# Supplementary material
Source: MDPI journal article supplement (https://www.mdpi.com/2304-6740/3/4/534)
Supplement: s1 [file s1]

Archive with 2 entries (2 files):
- big cif.cif
- checkcif.pdf
