# Supplementary material
Source: MDPI journal article supplement (https://www.mdpi.com/2304-6740/3/4/534)
Supplement: s1 [file s1 › big cif.cif]

data_1

_manchester_internal_coll_name         adpm60
_manchester_internal_coll_client       FO/HZ/DPM
_manchester_internal_coll_type         'custom'
_manchester_internal_coll_frame_time   '165s'
_manchester_internal_coll_frame_width  '1'
_manchester_internal_coll_frame_method '\w scans'
_manchester_internal_coll_user         FO
_manchester_internal_coll_date         02/07/2014
_manchester_internal_process_user      FO
_manchester_internal_process_date      02/07/2014
_manchester_internal_solution_user     FO
_manchester_internal_solution_date     02/07/2014
_manchester_internal_refinement_user   FO
_manchester_internal_refinement_date   13/08/2015
_manchester_internal_validation_user   FO
_manchester_internal_validation_date   13/08/2015
_manchester_internal_archive_date      13/08/2015

_refine_special_details           
;
Restraints were applied to the anistropic displacement parameters
of the solvent molecule present in the lattice (toluene).
;

# start Validation Reply Form
_vrf_PLAT910_1
;
PROBLEM: Missing # of FCF Reflection(s) Below Th(Min) ...         16 Report
RESPONSE: Reduction of beam stop mask did not yield significant
          improvement. Most of those missing strong reflections 
          appeared to be very strong and were treated as overflows.
;
_vrf_PLAT971_1
;
PROBLEM: Check Calcd Residual Density  1.05A From     Ce1       3.46 eA-3  
RESPONSE: The residual density could not be modelled as any chemically
          sensible species. Since the peak is in the proximity of a strong
          absorber, this could be due to imperfections in the absorption
          corrections.
;
# end Validation Reply Form

_audit_creation_date              2015-08-13
_audit_creation_method
;
Olex2 1.2
(compiled 2015.01.26 svn.r3150 for OlexSys, GUI svn.r4998)
;
_publ_contact_author_address     
;
School  of Chemistry, University of Manchester
;
_publ_contact_author_email        
;
david.mills@manchester.ac.uk
;
_publ_contact_author_name         'David P. Mills'
_publ_contact_author_phone        '0161 275-4606'
_publ_section_references
;
Burla, M.C., Caliandro, R., Camalli, M., Carrozzini, B., Cascarano, G.L.,
 De Caro, L., Giacovazzo, C., Polidori, G., Siliqi, D., Spagna, R.
 (2007). J. Appl. Cryst. 40, 609-613.

Dolomanov, O.V., Bourhis, L.J., Gildea, R.J, Howard, J.A.K. & Puschmann, H.
 (2009), J. Appl. Cryst. 42, 339-341.

Sheldrick, G.M. (2008). Acta Cryst. A64, 112-122.

Sheldrick, G.M. (2015). Acta Cryst. C71, 3-8.
;
_chemical_name_common             ?
_chemical_name_systematic         ?
_chemical_formula_moiety          'C35 H51 B2 Ce N14, C7 H8'
_chemical_formula_sum             'C42 H59 B2 Ce N14'
_chemical_formula_weight          921.77
_chemical_melting_point           ?
_chemical_oxdiff_formula          C60H70N14Ce
loop_
  _atom_type_symbol
  _atom_type_description
  _atom_type_scat_dispersion_real
  _atom_type_scat_dispersion_imag
  _atom_type_scat_source
 'C' 'C' 0.0033 0.0016 'International Tables Vol C Tables 4.2.6.8 and 6.1.1.4'
 'H' 'H' 0.0000 0.0000 'International Tables Vol C Tables 4.2.6.8 and 6.1.1.4'
 'B' 'B' 0.0013 0.0007 'International Tables Vol C Tables 4.2.6.8 and 6.1.1.4'
 'Ce' 'Ce' -0.2486 2.6331
 'International Tables Vol C Tables 4.2.6.8 and 6.1.1.4'
 'N' 'N' 0.0061 0.0033 'International Tables Vol C Tables 4.2.6.8 and 6.1.1.4'

_shelx_space_group_comment
;
The symmetry employed for this shelxl refinement is uniquely defined
by the following loop, which should always be used as a source of
symmetry information in preference to the above space-group names.
They are only intended as comments.
;
_space_group_crystal_system       'triclinic'
_space_group_IT_number            2
_space_group_name_H-M_alt         'P -1'
_space_group_name_Hall            '-P 1'
loop_
  _space_group_symop_operation_xyz
 'x, y, z'
 '-x, -y, -z'

_cell_length_a                    11.1262(9)
_cell_length_b                    14.6920(14)
_cell_length_c                    14.7874(14)
_cell_angle_alpha                 70.037(9)
_cell_angle_beta                  85.302(8)
_cell_angle_gamma                 81.302(7)
_cell_volume                      2244.7(4)
_cell_formula_units_Z             2
_cell_measurement_reflns_used     5725
_cell_measurement_temperature     150(1)
_cell_measurement_theta_max       27.8380
_cell_measurement_theta_min       3.6400
_shelx_estimated_absorpt_T_max    ?
_shelx_estimated_absorpt_T_min    ?
_exptl_absorpt_coefficient_mu     1.061
_exptl_absorpt_correction_T_max   1.000
_exptl_absorpt_correction_T_min   0.806
_exptl_absorpt_correction_type    gaussian
_exptl_absorpt_process_details
;
CrysAlisPro, Agilent Technologies,
Version 1.171.36.32 (release 02-08-2013 CrysAlis171 .NET)
(compiled Aug  2 2013,16:46:58)
Numerical absorption correction based on gaussian integration over
			a multifaceted crystal model
;
_exptl_absorpt_special_details    ?
_exptl_crystal_colour             'yellow'
_exptl_crystal_density_diffrn     1.364
_exptl_crystal_density_meas       ?
_exptl_crystal_density_method     ?
_exptl_crystal_description        'block'
_exptl_crystal_F_000              954
_exptl_crystal_size_max           0.171
_exptl_crystal_size_mid           0.1522
_exptl_crystal_size_min           0.0945
_exptl_transmission_factor_max    ?
_exptl_transmission_factor_min    ?
_diffrn_reflns_av_R_equivalents   0.0954
_diffrn_reflns_av_unetI/netI      0.1388
_diffrn_reflns_Laue_measured_fraction_full 0.996
_diffrn_reflns_Laue_measured_fraction_max 0.996
_diffrn_reflns_limit_h_max        13
_diffrn_reflns_limit_h_min        -12
_diffrn_reflns_limit_k_max        16
_diffrn_reflns_limit_k_min        -17
_diffrn_reflns_limit_l_max        13
_diffrn_reflns_limit_l_min        -17
_diffrn_reflns_number             15541
_diffrn_reflns_point_group_measured_fraction_full 0.996
_diffrn_reflns_point_group_measured_fraction_max 0.996
_diffrn_reflns_theta_full         25.242
_diffrn_reflns_theta_max          25.350
_diffrn_reflns_theta_min          3.131
_diffrn_ambient_temperature       150(1)
_diffrn_detector_area_resol_mean  8.0714
_diffrn_measured_fraction_theta_full 0.996
_diffrn_measured_fraction_theta_max 0.996
_diffrn_measurement_details
;
#__ type_ start__ end____ width___ exp.time_
  1 omega    2.00   62.00   1.0000  165.0000
omega____ theta____ kappa____ phi______ frames
    -       19.8682   57.0000  -30.0000 60

#__ type_ start__ end____ width___ exp.time_
  2 omega    1.00   79.00   1.0000  165.0000
omega____ theta____ kappa____ phi______ frames
    -       19.8682   77.0000 -150.0000 78

#__ type_ start__ end____ width___ exp.time_
  3 omega   37.00   63.00   1.0000  165.0000
omega____ theta____ kappa____ phi______ frames
    -       19.8682  -99.0000  -30.0000 26

#__ type_ start__ end____ width___ exp.time_
  4 omega  -53.00   47.00   1.0000  165.0000
omega____ theta____ kappa____ phi______ frames
    -       19.8682  -37.0000   60.0000 100

#__ type_ start__ end____ width___ exp.time_
  5 omega   21.00   74.00   1.0000  165.0000
omega____ theta____ kappa____ phi______ frames
    -       19.8682 -118.0000  151.0000 53

#__ type_ start__ end____ width___ exp.time_
  6 omega  -52.00   46.00   1.0000  165.0000
omega____ theta____ kappa____ phi______ frames
    -       19.8682  -37.0000  -30.0000 98
;
_diffrn_measurement_device_type   'SuperNova, Single source at offset, Eos'
_diffrn_measurement_method        '\w scans'
_diffrn_orient_matrix_UB_11       -0.0064008000
_diffrn_orient_matrix_UB_12       0.0298472000
_diffrn_orient_matrix_UB_13       -0.0489230000
_diffrn_orient_matrix_UB_21       0.0528737000
_diffrn_orient_matrix_UB_22       -0.0271213000
_diffrn_orient_matrix_UB_23       -0.0128077000
_diffrn_orient_matrix_UB_31       -0.0364289000
_diffrn_orient_matrix_UB_32       -0.0325324000
_diffrn_orient_matrix_UB_33       -0.0070465000
_diffrn_radiation_monochromator   mirror
_diffrn_radiation_type            MoK\a
_diffrn_radiation_wavelength      0.71073
_diffrn_source                    'SuperNova (Mo) X-ray Source'
_reflns_Friedel_coverage          0.000
_reflns_Friedel_fraction_full     .
_reflns_Friedel_fraction_max      .
_reflns_number_gt                 6502
_reflns_number_total              8201
_reflns_odcompleteness_completeness 99.54
_reflns_odcompleteness_iscentric  1
_reflns_odcompleteness_theta      26.32
_reflns_special_details
;
 Reflections were merged by SHELXL according to the crystal
 class for the calculation of statistics and refinement.
 
 _reflns_Friedel_fraction is defined as the number of unique
 Friedel pairs measured divided by the number that would be
 possible theoretically, ignoring centric projections and
 systematic absences.
;
_reflns_threshold_expression      'I > 2\s(I)'
_computing_cell_refinement
;
CrysAlisPro, Agilent Technologies,
Version 1.171.36.32 (release 02-08-2013 CrysAlis171 .NET)
(compiled Aug  2 2013,16:46:58)
;
_computing_data_collection
;
CrysAlisPro, Agilent Technologies,
Version 1.171.36.32 (release 02-08-2013 CrysAlis171 .NET)
(compiled Aug  2 2013,16:46:58)
;
_computing_data_reduction
;
CrysAlisPro, Agilent Technologies,
Version 1.171.36.32 (release 02-08-2013 CrysAlis171 .NET)
(compiled Aug  2 2013,16:46:58)
;
_computing_molecular_graphics     'Olex2 (Dolomanov et al., 2009)'
_computing_publication_material   'Olex2 (Dolomanov et al., 2009)'
_computing_structure_refinement   'ShelXL (Sheldrick, 2015)'
_computing_structure_solution     'ShelXS (Sheldrick, 2008)'
_refine_diff_density_max          3.588
_refine_diff_density_min          -1.670
_refine_diff_density_rms          0.159
_refine_ls_extinction_coef        .
_refine_ls_extinction_method      none
_refine_ls_goodness_of_fit_ref    1.037
_refine_ls_hydrogen_treatment     constr
_refine_ls_matrix_type            full
_refine_ls_number_parameters      547
_refine_ls_number_reflns          8201
_refine_ls_number_restraints      51
_refine_ls_R_factor_all           0.0845
_refine_ls_R_factor_gt            0.0642
_refine_ls_restrained_S_all       1.046
_refine_ls_shift/su_max           0.001
_refine_ls_shift/su_mean          0.000
_refine_ls_structure_factor_coef  Fsqd
_refine_ls_weighting_details
'w=1/[\s^2^(Fo^2^)+(0.0495P)^2^] where P=(Fo^2^+2Fc^2^)/3'
_refine_ls_weighting_scheme       calc
_refine_ls_wR_factor_gt           0.1312
_refine_ls_wR_factor_ref          0.1414

_olex2_refinement_description
;
1. Fixed Uiso
 At 1.2 times of:
  All B(H) groups, All C(H) groups
 At 1.5 times of:
  All C(H,H,H) groups
2. Uiso/Uaniso restraints and constraints
Uanis(C36) \\sim Ueq: with sigma of 0.004 and sigma for terminal atoms of 0.004
3. Rigid body (RIGU) restrains
 C42, C36, C41, C40, C39, C38, C37
 with sigma for 1-2 distances of 0.004 and sigma for 1-3 distances of 0.004
4.a Ternary CH refined with riding coordinates:
 B1(H1), B2(H2A)
4.b Aromatic/amide H refined with riding coordinates:
 C2(H2), C7(H7), C12(H12), C17(H17), C22(H22), C27(H27), C32(H32), C37(H37),
 C38(H38), C39(H39), C40(H40), C41(H41)
4.c Idealised Me refined as rotating group:
 C4(H4A,H4B,H4C), C5(H5A,H5B,H5C), C9(H9A,H9B,H9C), C10(H10A,H10B,H10C),
 C14(H14A,H14B,H14C), C15(H15A,H15B,H15C), C19(H19A,H19B,H19C), C20(H20A,H20B,
 H20C), C24(H24A,H24B,H24C), C25(H25A,H25B,H25C), C29(H29A,H29B,H29C), C30(H30A,
 H30B,H30C), C34(H34A,H34B,H34C), C35(H35A,H35B,H35C), C42(H42A,H42B,H42C)
;
_atom_sites_solution_hydrogens    geom
_atom_sites_solution_primary      ?
_atom_sites_solution_secondary    ?
loop_
  _atom_site_label
  _atom_site_type_symbol
  _atom_site_fract_x
  _atom_site_fract_y
  _atom_site_fract_z
  _atom_site_U_iso_or_equiv
  _atom_site_adp_type
  _atom_site_occupancy
  _atom_site_site_symmetry_order
  _atom_site_calc_flag
  _atom_site_refinement_flags_posn
  _atom_site_refinement_flags_adp
  _atom_site_refinement_flags_occupancy
  _atom_site_disorder_assembly
  _atom_site_disorder_group
 Ce1 Ce 0.68831(3) 0.81119(2) 0.84045(2) 0.01485(12) Uani 1 1 d . . . . .
 N1 N 0.6974(4) 0.5600(4) 0.9486(3) 0.0178(11) Uani 1 1 d . . . . .
 N2 N 0.7079(4) 0.6242(4) 0.8562(3) 0.0182(11) Uani 1 1 d . . . . .
 N3 N 0.6369(4) 0.6476(4) 1.0696(3) 0.0185(12) Uani 1 1 d . . . . .
 N4 N 0.5913(4) 0.7364(3) 1.0096(3) 0.0171(11) Uani 1 1 d . . . . .
 N5 N 0.8567(4) 0.6211(4) 1.0166(3) 0.0161(11) Uani 1 1 d . . . . .
 N6 N 0.8731(4) 0.7093(4) 0.9465(3) 0.0160(11) Uani 1 1 d . . . . .
 N7 N 0.6413(4) 1.0615(4) 0.7335(3) 0.0191(12) Uani 1 1 d . . . . .
 N8 N 0.5710(4) 0.9889(4) 0.7805(3) 0.0202(12) Uani 1 1 d . . . . .
 N9 N 0.8604(4) 0.9929(4) 0.7061(3) 0.0208(12) Uani 1 1 d . . . . .
 N10 N 0.8545(4) 0.8951(4) 0.7281(3) 0.0182(11) Uani 1 1 d . . . . .
 N11 N 0.7942(4) 1.0163(4) 0.8630(3) 0.0162(11) Uani 1 1 d . . . . .
 N12 N 0.7634(4) 0.9279(4) 0.9222(3) 0.0169(11) Uani 1 1 d . . . . .
 N13 N 0.6266(4) 0.8390(4) 0.6815(3) 0.0226(12) Uani 1 1 d . . . . .
 N14 N 0.5296(4) 0.7996(4) 0.7355(3) 0.0240(13) Uani 1 1 d . . . . .
 C1 C 0.6635(5) 0.4768(4) 0.9476(4) 0.0189(13) Uani 1 1 d . . . . .
 C2 C 0.6553(5) 0.4851(5) 0.8537(4) 0.0244(15) Uani 1 1 d . . . . .
 H2 H 0.6346 0.4381 0.8308 0.029 Uiso 1 1 calc R . . . .
 C3 C 0.6834(5) 0.5758(5) 0.7994(4) 0.0216(14) Uani 1 1 d . . . . .
 C4 C 0.6404(6) 0.3942(5) 1.0352(4) 0.0296(16) Uani 1 1 d . . . . .
 H4A H 0.7146 0.3673 1.0689 0.044 Uiso 1 1 calc GR . . . .
 H4B H 0.6105 0.3449 1.0175 0.044 Uiso 1 1 calc GR . . . .
 H4C H 0.5809 0.4170 1.0762 0.044 Uiso 1 1 calc GR . . . .
 C5 C 0.6887(7) 0.6190(5) 0.6938(4) 0.0354(18) Uani 1 1 d . . . . .
 H5A H 0.7152 0.5685 0.6663 0.053 Uiso 1 1 calc GR . . . .
 H5B H 0.7450 0.6662 0.6748 0.053 Uiso 1 1 calc GR . . . .
 H5C H 0.6095 0.6504 0.6714 0.053 Uiso 1 1 calc GR . . . .
 C6 C 0.5888(5) 0.6336(5) 1.1586(4) 0.0220(15) Uani 1 1 d . . . . .
 C7 C 0.5112(6) 0.7148(5) 1.1563(4) 0.0254(16) Uani 1 1 d . . . . .
 H7 H 0.4644 0.7256 1.2077 0.031 Uiso 1 1 calc R . . . .
 C8 C 0.5151(5) 0.7778(5) 1.0638(4) 0.0190(14) Uani 1 1 d . . . . .
 C9 C 0.6189(6) 0.5423(5) 1.2412(4) 0.0352(18) Uani 1 1 d . . . . .
 H9A H 0.5909 0.4888 1.2295 0.053 Uiso 1 1 calc GR . . . .
 H9B H 0.5800 0.5500 1.2990 0.053 Uiso 1 1 calc GR . . . .
 H9C H 0.7055 0.5292 1.2484 0.053 Uiso 1 1 calc GR . . . .
 C10 C 0.4531(6) 0.8777(5) 1.0230(5) 0.0318(16) Uani 1 1 d . . . . .
 H10A H 0.5010 0.9142 0.9697 0.048 Uiso 1 1 calc GR . . . .
 H10B H 0.4427 0.9084 1.0714 0.048 Uiso 1 1 calc GR . . . .
 H10C H 0.3749 0.8757 1.0012 0.048 Uiso 1 1 calc GR . . . .
 C11 C 0.9568(5) 0.5830(5) 1.0673(4) 0.0199(14) Uani 1 1 d . . . . .
 C12 C 1.0407(5) 0.6475(5) 1.0315(4) 0.0193(14) Uani 1 1 d . . . . .
 H12 H 1.1188 0.6409 1.0531 0.023 Uiso 1 1 calc R . . . .
 C13 C 0.9866(5) 0.7224(5) 0.9584(4) 0.0180(14) Uani 1 1 d . . . . .
 C14 C 0.9720(6) 0.4872(5) 1.1452(4) 0.0260(15) Uani 1 1 d . . . . .
 H14A H 0.9214 0.4909 1.1999 0.039 Uiso 1 1 calc GR . . . .
 H14B H 1.0555 0.4704 1.1631 0.039 Uiso 1 1 calc GR . . . .
 H14C H 0.9489 0.4383 1.1230 0.039 Uiso 1 1 calc GR . . . .
 C15 C 1.0429(5) 0.8093(5) 0.8970(4) 0.0244(15) Uani 1 1 d . . . . .
 H15A H 1.0691 0.8015 0.8363 0.037 Uiso 1 1 calc GR . . . .
 H15B H 1.1116 0.8158 0.9285 0.037 Uiso 1 1 calc GR . . . .
 H15C H 0.9843 0.8667 0.8866 0.037 Uiso 1 1 calc GR . . . .
 C16 C 0.5736(6) 1.1376(5) 0.6753(4) 0.0289(16) Uani 1 1 d . . . . .
 C17 C 0.4577(6) 1.1168(5) 0.6849(4) 0.0298(16) Uani 1 1 d . . . . .
 H17 H 0.3905 1.1573 0.6533 0.036 Uiso 1 1 calc R . . . .
 C18 C 0.4590(5) 1.0258(5) 0.7493(4) 0.0231(15) Uani 1 1 d . . . . .
 C19 C 0.6230(7) 1.2273(5) 0.6122(5) 0.0411(19) Uani 1 1 d . . . . .
 H19A H 0.6596 1.2557 0.6509 0.062 Uiso 1 1 calc GR . . . .
 H19B H 0.5582 1.2733 0.5769 0.062 Uiso 1 1 calc GR . . . .
 H19C H 0.6831 1.2108 0.5679 0.062 Uiso 1 1 calc GR . . . .
 C20 C 0.3546(6) 0.9691(5) 0.7864(5) 0.0321(17) Uani 1 1 d . . . . .
 H20A H 0.3846 0.9025 0.8214 0.048 Uiso 1 1 calc GR . . . .
 H20B H 0.3086 0.9714 0.7334 0.048 Uiso 1 1 calc GR . . . .
 H20C H 0.3034 0.9970 0.8283 0.048 Uiso 1 1 calc GR . . . .
 C21 C 0.9532(6) 1.0178(5) 0.6423(4) 0.0269(16) Uani 1 1 d . . . . .
 C22 C 1.0056(6) 0.9365(5) 0.6242(4) 0.0273(16) Uani 1 1 d . . . . .
 H22 H 1.0725 0.9322 0.5831 0.033 Uiso 1 1 calc R . . . .
 C23 C 0.9422(5) 0.8612(5) 0.6776(4) 0.0181(13) Uani 1 1 d . . . . .
 C24 C 0.9852(7) 1.1188(5) 0.6037(5) 0.046(2) Uani 1 1 d . . . . .
 H24A H 0.9134 1.1639 0.5812 0.070 Uiso 1 1 calc GR . . . .
 H24B H 1.0437 1.1239 0.5513 0.070 Uiso 1 1 calc GR . . . .
 H24C H 1.0193 1.1339 0.6537 0.070 Uiso 1 1 calc GR . . . .
 C25 C 0.9600(6) 0.7580(5) 0.6843(4) 0.0313(16) Uani 1 1 d . . . . .
 H25A H 0.9194 0.7205 0.7418 0.047 Uiso 1 1 calc GR . . . .
 H25B H 1.0453 0.7344 0.6865 0.047 Uiso 1 1 calc GR . . . .
 H25C H 0.9268 0.7518 0.6291 0.047 Uiso 1 1 calc GR . . . .
 C26 C 0.8466(5) 1.0596(5) 0.9139(4) 0.0190(14) Uani 1 1 d . . . . .
 C27 C 0.8503(5) 0.9991(5) 1.0063(4) 0.0211(14) Uani 1 1 d . . . . .
 H27 H 0.8821 1.0093 1.0578 0.025 Uiso 1 1 calc R . . . .
 C28 C 0.7971(5) 0.9193(4) 1.0088(4) 0.0156(13) Uani 1 1 d . . . . .
 C29 C 0.8869(6) 1.1567(5) 0.8710(4) 0.0302(17) Uani 1 1 d . . . . .
 H29A H 0.9384 1.1583 0.8153 0.045 Uiso 1 1 calc GR . . . .
 H29B H 0.9312 1.1698 0.9172 0.045 Uiso 1 1 calc GR . . . .
 H29C H 0.8172 1.2055 0.8524 0.045 Uiso 1 1 calc GR . . . .
 C30 C 0.7787(5) 0.8339(5) 1.0969(4) 0.0215(15) Uani 1 1 d . . . . .
 H30A H 0.8337 0.8303 1.1451 0.032 Uiso 1 1 calc GR . . . .
 H30B H 0.7940 0.7750 1.0810 0.032 Uiso 1 1 calc GR . . . .
 H30C H 0.6964 0.8415 1.1212 0.032 Uiso 1 1 calc GR . . . .
 C31 C 0.6022(6) 0.8692(5) 0.5895(4) 0.0246(15) Uani 1 1 d . . . . .
 C32 C 0.4883(6) 0.8487(5) 0.5809(4) 0.0313(17) Uani 1 1 d . . . . .
 H32 H 0.4483 0.8614 0.5242 0.038 Uiso 1 1 calc R . . . .
 C33 C 0.4459(6) 0.8057(5) 0.6728(4) 0.0271(16) Uani 1 1 d . . . . .
 C34 C 0.6927(6) 0.9142(6) 0.5150(4) 0.041(2) Uani 1 1 d . . . . .
 H34A H 0.7534 0.9343 0.5441 0.061 Uiso 1 1 calc GR . . . .
 H34B H 0.6528 0.9701 0.4668 0.061 Uiso 1 1 calc GR . . . .
 H34C H 0.7307 0.8675 0.4858 0.061 Uiso 1 1 calc GR . . . .
 C35 C 0.3281(6) 0.7668(6) 0.7026(5) 0.046(2) Uani 1 1 d . . . . .
 H35A H 0.2678 0.8171 0.7122 0.069 Uiso 1 1 calc GR . . . .
 H35B H 0.3373 0.7125 0.7615 0.069 Uiso 1 1 calc GR . . . .
 H35C H 0.3028 0.7456 0.6533 0.069 Uiso 1 1 calc GR . . . .
 B1 B 0.7342(6) 0.5797(5) 1.0376(5) 0.0184(16) Uani 1 1 d . . . . .
 H1 H 0.7454 0.5171 1.0904 0.022 Uiso 1 1 calc R . . . .
 B2 B 0.7759(6) 1.0543(5) 0.7553(4) 0.0215(16) Uani 1 1 d . . . . .
 H2A H 0.7983 1.1206 0.7304 0.026 Uiso 1 1 calc R . . . .
 C36 C 1.0429(10) 0.6186(8) 0.4509(7) 0.070(2) Uani 1 1 d . U . . .
 C37 C 1.0564(14) 0.6228(8) 0.3514(8) 0.104(3) Uani 1 1 d . U . . .
 H37 H 1.1318 0.6083 0.3238 0.125 Uiso 1 1 calc R . . . .
 C38 C 0.9509(13) 0.6496(7) 0.2993(7) 0.088(3) Uani 1 1 d . U . . .
 H38 H 0.9532 0.6503 0.2361 0.105 Uiso 1 1 calc R . . . .
 C39 C 0.8433(13) 0.6750(8) 0.3423(8) 0.099(3) Uani 1 1 d . U . . .
 H39 H 0.7760 0.6974 0.3035 0.118 Uiso 1 1 calc R . . . .
 C40 C 0.8249(12) 0.6713(8) 0.4329(7) 0.091(3) Uani 1 1 d . U . . .
 H40 H 0.7497 0.6872 0.4601 0.109 Uiso 1 1 calc R . . . .
 C41 C 0.9309(11) 0.6408(7) 0.4814(7) 0.071(2) Uani 1 1 d . U . . .
 H41 H 0.9230 0.6346 0.5462 0.086 Uiso 1 1 calc R . . . .
 C42 C 1.1483(12) 0.5922(9) 0.5129(9) 0.128(5) Uani 1 1 d . U . . .
 H42A H 1.2207 0.5788 0.4770 0.192 Uiso 1 1 calc GR . . . .
 H42B H 1.1368 0.5352 0.5673 0.192 Uiso 1 1 calc GR . . . .
 H42C H 1.1563 0.6454 0.5348 0.192 Uiso 1 1 calc GR . . . .

loop_
  _atom_site_aniso_label
  _atom_site_aniso_U_11
  _atom_site_aniso_U_22
  _atom_site_aniso_U_33
  _atom_site_aniso_U_23
  _atom_site_aniso_U_13
  _atom_site_aniso_U_12
 Ce1 0.01915(19) 0.0105(2) 0.01504(19) -0.00197(13) -0.00175(13) -0.00718(14)
 N1 0.022(3) 0.013(3) 0.018(2) -0.003(2) -0.003(2) -0.007(2)
 N2 0.022(3) 0.014(3) 0.019(3) -0.004(2) -0.005(2) -0.005(2)
 N3 0.018(3) 0.020(3) 0.016(2) -0.001(2) -0.001(2) -0.011(2)
 N4 0.020(3) 0.004(3) 0.025(3) 0.001(2) -0.002(2) -0.006(2)
 N5 0.018(2) 0.012(3) 0.016(2) 0.001(2) -0.007(2) -0.004(2)
 N6 0.012(2) 0.011(3) 0.020(2) 0.003(2) -0.004(2) -0.004(2)
 N7 0.030(3) 0.014(3) 0.014(2) -0.001(2) -0.010(2) -0.006(2)
 N8 0.024(3) 0.014(3) 0.022(3) -0.003(2) 0.001(2) -0.009(2)
 N9 0.024(3) 0.018(3) 0.020(3) -0.003(2) 0.002(2) -0.011(2)
 N10 0.021(3) 0.013(3) 0.020(3) -0.003(2) -0.001(2) -0.006(2)
 N11 0.020(2) 0.013(3) 0.015(2) -0.002(2) 0.000(2) -0.007(2)
 N12 0.024(3) 0.007(3) 0.021(3) -0.004(2) -0.001(2) -0.006(2)
 N13 0.026(3) 0.021(3) 0.022(3) -0.006(2) 0.002(2) -0.008(3)
 N14 0.021(3) 0.020(3) 0.028(3) -0.001(2) -0.008(2) -0.004(2)
 C1 0.015(3) 0.006(3) 0.034(3) -0.005(3) -0.002(3) -0.002(3)
 C2 0.018(3) 0.019(4) 0.042(4) -0.015(3) -0.004(3) -0.005(3)
 C3 0.025(3) 0.018(4) 0.029(3) -0.015(3) -0.004(3) -0.004(3)
 C4 0.032(4) 0.016(4) 0.040(4) -0.005(3) 0.002(3) -0.015(3)
 C5 0.048(4) 0.028(5) 0.034(4) -0.013(3) -0.010(3) -0.004(4)
 C6 0.025(3) 0.024(4) 0.017(3) -0.004(3) -0.001(3) -0.013(3)
 C7 0.027(3) 0.029(4) 0.024(3) -0.010(3) 0.008(3) -0.017(3)
 C8 0.020(3) 0.013(4) 0.027(3) -0.010(3) 0.004(3) -0.008(3)
 C9 0.036(4) 0.038(5) 0.024(3) 0.002(3) 0.002(3) -0.014(4)
 C10 0.033(4) 0.026(4) 0.037(4) -0.013(3) 0.010(3) -0.005(3)
 C11 0.022(3) 0.020(4) 0.017(3) -0.004(3) -0.003(3) -0.001(3)
 C12 0.016(3) 0.020(4) 0.024(3) -0.011(3) -0.004(3) -0.002(3)
 C13 0.016(3) 0.021(4) 0.022(3) -0.011(3) -0.003(3) -0.007(3)
 C14 0.028(3) 0.019(4) 0.027(3) -0.002(3) -0.009(3) 0.001(3)
 C15 0.021(3) 0.026(4) 0.027(3) -0.005(3) -0.004(3) -0.014(3)
 C16 0.043(4) 0.028(5) 0.014(3) -0.003(3) -0.010(3) -0.005(4)
 C17 0.029(4) 0.028(5) 0.029(4) -0.005(3) -0.019(3) 0.007(3)
 C18 0.025(3) 0.026(4) 0.020(3) -0.008(3) -0.008(3) -0.002(3)
 C19 0.055(5) 0.023(5) 0.033(4) 0.010(3) -0.016(4) -0.003(4)
 C20 0.026(3) 0.039(5) 0.036(4) -0.019(3) -0.002(3) -0.004(3)
 C21 0.038(4) 0.020(4) 0.022(3) -0.005(3) 0.008(3) -0.012(3)
 C22 0.032(4) 0.022(4) 0.025(3) -0.004(3) 0.006(3) -0.007(3)
 C23 0.022(3) 0.012(4) 0.018(3) -0.003(2) -0.002(3) -0.002(3)
 C24 0.058(5) 0.028(5) 0.050(4) -0.008(4) 0.032(4) -0.023(4)
 C25 0.039(4) 0.023(4) 0.032(4) -0.009(3) 0.005(3) -0.005(3)
 C26 0.017(3) 0.017(4) 0.026(3) -0.007(3) -0.003(3) -0.008(3)
 C27 0.018(3) 0.026(4) 0.021(3) -0.007(3) -0.003(3) -0.009(3)
 C28 0.013(3) 0.018(4) 0.014(3) -0.001(2) 0.000(2) -0.006(3)
 C29 0.037(4) 0.024(4) 0.033(4) -0.008(3) -0.004(3) -0.020(3)
 C30 0.025(3) 0.020(4) 0.019(3) -0.002(3) -0.008(3) -0.011(3)
 C31 0.032(4) 0.022(4) 0.015(3) -0.002(3) -0.009(3) 0.004(3)
 C32 0.038(4) 0.033(5) 0.020(3) -0.004(3) -0.013(3) -0.002(4)
 C33 0.030(4) 0.025(4) 0.028(3) -0.009(3) -0.009(3) -0.001(3)
 C34 0.040(4) 0.049(6) 0.022(4) 0.004(3) -0.005(3) -0.010(4)
 C35 0.022(4) 0.038(5) 0.070(5) -0.001(4) -0.019(4) -0.010(4)
 B1 0.027(4) 0.009(4) 0.020(3) -0.002(3) -0.003(3) -0.010(3)
 B2 0.028(4) 0.015(4) 0.019(3) -0.001(3) 0.000(3) -0.008(3)
 C36 0.091(4) 0.047(4) 0.071(4) -0.014(3) 0.000(3) -0.018(3)
 C37 0.182(9) 0.032(6) 0.087(5) 0.000(4) 0.009(5) -0.037(6)
 C38 0.176(9) 0.033(6) 0.056(5) -0.011(4) 0.011(5) -0.034(6)
 C39 0.182(9) 0.045(7) 0.065(5) -0.008(5) 0.001(5) -0.031(6)
 C40 0.131(7) 0.061(8) 0.075(6) -0.014(5) -0.007(5) -0.015(6)
 C41 0.120(6) 0.029(5) 0.068(5) -0.014(4) -0.012(4) -0.018(5)
 C42 0.143(8) 0.057(9) 0.163(9) 0.007(7) -0.037(7) -0.032(7)

_geom_special_details
;
 All esds (except the esd in the dihedral angle between two l.s. planes)
 are estimated using the full covariance matrix.  The cell esds are taken
 into account individually in the estimation of esds in distances, angles
 and torsion angles; correlations between esds in cell parameters are only
 used when they are defined by crystal symmetry.  An approximate (isotropic)
 treatment of cell esds is used for estimating esds involving l.s. planes.
;
loop_
  _geom_bond_atom_site_label_1
  _geom_bond_atom_site_label_2
  _geom_bond_distance
  _geom_bond_site_symmetry_2
  _geom_bond_publ_flag
 Ce1 N2 2.653(5) . ?
 Ce1 N4 2.582(4) . ?
 Ce1 N6 2.631(5) . ?
 Ce1 N8 2.624(5) . ?
 Ce1 N10 2.546(4) . ?
 Ce1 N12 2.667(4) . ?
 Ce1 N13 2.385(5) . ?
 Ce1 N14 2.505(5) . ?
 N1 N2 1.377(6) . ?
 N1 C1 1.338(7) . ?
 N1 B1 1.539(7) . ?
 N2 C3 1.337(7) . ?
 N3 N4 1.353(7) . ?
 N3 C6 1.339(7) . ?
 N3 B1 1.518(9) . ?
 N4 C8 1.340(7) . ?
 N5 N6 1.382(6) . ?
 N5 C11 1.333(7) . ?
 N5 B1 1.541(7) . ?
 N6 C13 1.341(6) . ?
 N7 N8 1.374(6) . ?
 N7 C16 1.324(8) . ?
 N7 B2 1.539(8) . ?
 N8 C18 1.333(8) . ?
 N9 N10 1.372(7) . ?
 N9 C21 1.345(7) . ?
 N9 B2 1.519(9) . ?
 N10 C23 1.322(7) . ?
 N11 N12 1.371(6) . ?
 N11 C26 1.350(6) . ?
 N11 B2 1.516(8) . ?
 N12 C28 1.324(7) . ?
 N13 N14 1.368(6) . ?
 N13 C31 1.315(7) . ?
 N14 C33 1.339(7) . ?
 C1 C2 1.361(8) . ?
 C1 C4 1.478(8) . ?
 C2 H2 0.9300 . ?
 C2 C3 1.369(8) . ?
 C3 C5 1.472(8) . ?
 C4 H4A 0.9600 . ?
 C4 H4B 0.9600 . ?
 C4 H4C 0.9600 . ?
 C5 H5A 0.9600 . ?
 C5 H5B 0.9600 . ?
 C5 H5C 0.9600 . ?
 C6 C7 1.355(9) . ?
 C6 C9 1.489(9) . ?
 C7 H7 0.9300 . ?
 C7 C8 1.367(8) . ?
 C8 C10 1.466(9) . ?
 C9 H9A 0.9600 . ?
 C9 H9B 0.9600 . ?
 C9 H9C 0.9600 . ?
 C10 H10A 0.9600 . ?
 C10 H10B 0.9600 . ?
 C10 H10C 0.9600 . ?
 C11 C12 1.377(7) . ?
 C11 C14 1.479(8) . ?
 C12 H12 0.9300 . ?
 C12 C13 1.355(8) . ?
 C13 C15 1.484(7) . ?
 C14 H14A 0.9600 . ?
 C14 H14B 0.9600 . ?
 C14 H14C 0.9600 . ?
 C15 H15A 0.9600 . ?
 C15 H15B 0.9600 . ?
 C15 H15C 0.9600 . ?
 C16 C17 1.355(8) . ?
 C16 C19 1.484(8) . ?
 C17 H17 0.9300 . ?
 C17 C18 1.350(9) . ?
 C18 C20 1.489(8) . ?
 C19 H19A 0.9600 . ?
 C19 H19B 0.9600 . ?
 C19 H19C 0.9600 . ?
 C20 H20A 0.9600 . ?
 C20 H20B 0.9600 . ?
 C20 H20C 0.9600 . ?
 C21 C22 1.348(9) . ?
 C21 C24 1.485(8) . ?
 C22 H22 0.9300 . ?
 C22 C23 1.377(8) . ?
 C23 C25 1.468(9) . ?
 C24 H24A 0.9600 . ?
 C24 H24B 0.9600 . ?
 C24 H24C 0.9600 . ?
 C25 H25A 0.9600 . ?
 C25 H25B 0.9600 . ?
 C25 H25C 0.9600 . ?
 C26 C27 1.353(8) . ?
 C26 C29 1.473(8) . ?
 C27 H27 0.9300 . ?
 C27 C28 1.378(7) . ?
 C28 C30 1.494(7) . ?
 C29 H29A 0.9600 . ?
 C29 H29B 0.9600 . ?
 C29 H29C 0.9600 . ?
 C30 H30A 0.9600 . ?
 C30 H30B 0.9600 . ?
 C30 H30C 0.9600 . ?
 C31 C32 1.372(8) . ?
 C31 C34 1.478(8) . ?
 C32 H32 0.9300 . ?
 C32 C33 1.366(8) . ?
 C33 C35 1.483(8) . ?
 C34 H34A 0.9600 . ?
 C34 H34B 0.9600 . ?
 C34 H34C 0.9600 . ?
 C35 H35A 0.9600 . ?
 C35 H35B 0.9600 . ?
 C35 H35C 0.9600 . ?
 B1 H1 0.9800 . ?
 B2 H2A 0.9800 . ?
 C36 C37 1.449(13) . ?
 C36 C41 1.322(13) . ?
 C36 C42 1.470(14) . ?
 C37 H37 0.9300 . ?
 C37 C38 1.388(16) . ?
 C38 H38 0.9300 . ?
 C38 C39 1.371(16) . ?
 C39 H39 0.9300 . ?
 C39 C40 1.323(13) . ?
 C40 H40 0.9300 . ?
 C40 C41 1.366(14) . ?
 C41 H41 0.9300 . ?
 C42 H42A 0.9600 . ?
 C42 H42B 0.9600 . ?
 C42 H42C 0.9600 . ?

loop_
  _geom_angle_atom_site_label_1
  _geom_angle_atom_site_label_2
  _geom_angle_atom_site_label_3
  _geom_angle
  _geom_angle_site_symmetry_1
  _geom_angle_site_symmetry_3
  _geom_angle_publ_flag
 N2 Ce1 N12 140.98(14) . . ?
 N4 Ce1 N2 78.47(14) . . ?
 N4 Ce1 N6 75.79(14) . . ?
 N4 Ce1 N8 102.90(15) . . ?
 N4 Ce1 N12 82.55(13) . . ?
 N6 Ce1 N2 69.01(14) . . ?
 N6 Ce1 N12 73.43(15) . . ?
 N8 Ce1 N2 150.15(14) . . ?
 N8 Ce1 N6 140.68(14) . . ?
 N8 Ce1 N12 67.51(15) . . ?
 N10 Ce1 N2 111.14(15) . . ?
 N10 Ce1 N4 152.10(14) . . ?
 N10 Ce1 N6 83.31(14) . . ?
 N10 Ce1 N8 81.80(15) . . ?
 N10 Ce1 N12 73.83(14) . . ?
 N13 Ce1 N2 84.00(16) . . ?
 N13 Ce1 N4 133.54(14) . . ?
 N13 Ce1 N6 135.71(17) . . ?
 N13 Ce1 N8 73.52(17) . . ?
 N13 Ce1 N10 74.32(14) . . ?
 N13 Ce1 N12 132.25(15) . . ?
 N13 Ce1 N14 32.38(14) . . ?
 N14 Ce1 N2 74.00(16) . . ?
 N14 Ce1 N4 101.17(14) . . ?
 N14 Ce1 N6 142.76(17) . . ?
 N14 Ce1 N8 76.53(16) . . ?
 N14 Ce1 N10 106.64(14) . . ?
 N14 Ce1 N12 143.68(18) . . ?
 N2 N1 B1 123.1(4) . . ?
 C1 N1 N2 110.5(4) . . ?
 C1 N1 B1 126.0(5) . . ?
 N1 N2 Ce1 115.4(3) . . ?
 C3 N2 Ce1 134.8(4) . . ?
 C3 N2 N1 105.0(5) . . ?
 N4 N3 B1 122.6(4) . . ?
 C6 N3 N4 110.1(5) . . ?
 C6 N3 B1 127.2(5) . . ?
 N3 N4 Ce1 121.3(3) . . ?
 C8 N4 Ce1 130.9(4) . . ?
 C8 N4 N3 106.0(4) . . ?
 N6 N5 B1 123.3(5) . . ?
 C11 N5 N6 110.7(4) . . ?
 C11 N5 B1 125.8(5) . . ?
 N5 N6 Ce1 118.9(3) . . ?
 C13 N6 Ce1 136.6(4) . . ?
 C13 N6 N5 104.2(4) . . ?
 N8 N7 B2 122.6(5) . . ?
 C16 N7 N8 110.0(5) . . ?
 C16 N7 B2 127.1(5) . . ?
 N7 N8 Ce1 115.5(4) . . ?
 C18 N8 Ce1 133.6(4) . . ?
 C18 N8 N7 104.8(5) . . ?
 N10 N9 B2 121.5(4) . . ?
 C21 N9 N10 108.7(5) . . ?
 C21 N9 B2 129.7(5) . . ?
 N9 N10 Ce1 121.8(3) . . ?
 C23 N10 Ce1 130.8(4) . . ?
 C23 N10 N9 107.4(4) . . ?
 N12 N11 B2 123.1(4) . . ?
 C26 N11 N12 110.1(4) . . ?
 C26 N11 B2 126.7(5) . . ?
 N11 N12 Ce1 117.8(3) . . ?
 C28 N12 Ce1 136.3(4) . . ?
 C28 N12 N11 105.2(4) . . ?
 N14 N13 Ce1 78.7(3) . . ?
 C31 N13 Ce1 169.3(4) . . ?
 C31 N13 N14 109.7(5) . . ?
 N13 N14 Ce1 69.0(3) . . ?
 C33 N14 Ce1 172.4(4) . . ?
 C33 N14 N13 106.1(5) . . ?
 N1 C1 C2 107.2(5) . . ?
 N1 C1 C4 123.9(5) . . ?
 C2 C1 C4 128.9(5) . . ?
 C1 C2 H2 126.6 . . ?
 C1 C2 C3 106.9(5) . . ?
 C3 C2 H2 126.6 . . ?
 N2 C3 C2 110.4(5) . . ?
 N2 C3 C5 121.9(5) . . ?
 C2 C3 C5 127.7(5) . . ?
 C1 C4 H4A 109.5 . . ?
 C1 C4 H4B 109.5 . . ?
 C1 C4 H4C 109.5 . . ?
 H4A C4 H4B 109.5 . . ?
 H4A C4 H4C 109.5 . . ?
 H4B C4 H4C 109.5 . . ?
 C3 C5 H5A 109.5 . . ?
 C3 C5 H5B 109.5 . . ?
 C3 C5 H5C 109.5 . . ?
 H5A C5 H5B 109.5 . . ?
 H5A C5 H5C 109.5 . . ?
 H5B C5 H5C 109.5 . . ?
 N3 C6 C7 107.7(5) . . ?
 N3 C6 C9 123.4(6) . . ?
 C7 C6 C9 129.0(6) . . ?
 C6 C7 H7 126.7 . . ?
 C6 C7 C8 106.6(6) . . ?
 C8 C7 H7 126.7 . . ?
 N4 C8 C7 109.7(6) . . ?
 N4 C8 C10 121.1(5) . . ?
 C7 C8 C10 129.1(6) . . ?
 C6 C9 H9A 109.5 . . ?
 C6 C9 H9B 109.5 . . ?
 C6 C9 H9C 109.5 . . ?
 H9A C9 H9B 109.5 . . ?
 H9A C9 H9C 109.5 . . ?
 H9B C9 H9C 109.5 . . ?
 C8 C10 H10A 109.5 . . ?
 C8 C10 H10B 109.5 . . ?
 C8 C10 H10C 109.5 . . ?
 H10A C10 H10B 109.5 . . ?
 H10A C10 H10C 109.5 . . ?
 H10B C10 H10C 109.5 . . ?
 N5 C11 C12 107.3(5) . . ?
 N5 C11 C14 124.7(5) . . ?
 C12 C11 C14 127.9(6) . . ?
 C11 C12 H12 126.9 . . ?
 C13 C12 C11 106.1(5) . . ?
 C13 C12 H12 126.9 . . ?
 N6 C13 C12 111.7(5) . . ?
 N6 C13 C15 122.6(5) . . ?
 C12 C13 C15 125.7(5) . . ?
 C11 C14 H14A 109.5 . . ?
 C11 C14 H14B 109.5 . . ?
 C11 C14 H14C 109.5 . . ?
 H14A C14 H14B 109.5 . . ?
 H14A C14 H14C 109.5 . . ?
 H14B C14 H14C 109.5 . . ?
 C13 C15 H15A 109.5 . . ?
 C13 C15 H15B 109.5 . . ?
 C13 C15 H15C 109.5 . . ?
 H15A C15 H15B 109.5 . . ?
 H15A C15 H15C 109.5 . . ?
 H15B C15 H15C 109.5 . . ?
 N7 C16 C17 107.8(6) . . ?
 N7 C16 C19 123.4(6) . . ?
 C17 C16 C19 128.8(7) . . ?
 C16 C17 H17 126.7 . . ?
 C18 C17 C16 106.6(6) . . ?
 C18 C17 H17 126.7 . . ?
 N8 C18 C17 110.8(5) . . ?
 N8 C18 C20 121.1(6) . . ?
 C17 C18 C20 128.1(6) . . ?
 C16 C19 H19A 109.5 . . ?
 C16 C19 H19B 109.5 . . ?
 C16 C19 H19C 109.5 . . ?
 H19A C19 H19B 109.5 . . ?
 H19A C19 H19C 109.5 . . ?
 H19B C19 H19C 109.5 . . ?
 C18 C20 H20A 109.5 . . ?
 C18 C20 H20B 109.5 . . ?
 C18 C20 H20C 109.5 . . ?
 H20A C20 H20B 109.5 . . ?
 H20A C20 H20C 109.5 . . ?
 H20B C20 H20C 109.5 . . ?
 N9 C21 C22 107.6(5) . . ?
 N9 C21 C24 122.5(6) . . ?
 C22 C21 C24 129.8(6) . . ?
 C21 C22 H22 126.2 . . ?
 C21 C22 C23 107.6(6) . . ?
 C23 C22 H22 126.2 . . ?
 N10 C23 C22 108.7(6) . . ?
 N10 C23 C25 121.0(5) . . ?
 C22 C23 C25 130.3(6) . . ?
 C21 C24 H24A 109.5 . . ?
 C21 C24 H24B 109.5 . . ?
 C21 C24 H24C 109.5 . . ?
 H24A C24 H24B 109.5 . . ?
 H24A C24 H24C 109.5 . . ?
 H24B C24 H24C 109.5 . . ?
 C23 C25 H25A 109.5 . . ?
 C23 C25 H25B 109.5 . . ?
 C23 C25 H25C 109.5 . . ?
 H25A C25 H25B 109.5 . . ?
 H25A C25 H25C 109.5 . . ?
 H25B C25 H25C 109.5 . . ?
 N11 C26 C27 107.5(5) . . ?
 N11 C26 C29 123.1(5) . . ?
 C27 C26 C29 129.3(5) . . ?
 C26 C27 H27 127.0 . . ?
 C26 C27 C28 106.1(5) . . ?
 C28 C27 H27 127.0 . . ?
 N12 C28 C27 111.1(5) . . ?
 N12 C28 C30 123.6(5) . . ?
 C27 C28 C30 125.3(5) . . ?
 C26 C29 H29A 109.5 . . ?
 C26 C29 H29B 109.5 . . ?
 C26 C29 H29C 109.5 . . ?
 H29A C29 H29B 109.5 . . ?
 H29A C29 H29C 109.5 . . ?
 H29B C29 H29C 109.5 . . ?
 C28 C30 H30A 109.5 . . ?
 C28 C30 H30B 109.5 . . ?
 C28 C30 H30C 109.5 . . ?
 H30A C30 H30B 109.5 . . ?
 H30A C30 H30C 109.5 . . ?
 H30B C30 H30C 109.5 . . ?
 N13 C31 C32 108.6(5) . . ?
 N13 C31 C34 120.9(5) . . ?
 C32 C31 C34 130.5(5) . . ?
 C31 C32 H32 127.1 . . ?
 C33 C32 C31 105.8(5) . . ?
 C33 C32 H32 127.1 . . ?
 N14 C33 C32 109.9(5) . . ?
 N14 C33 C35 123.0(5) . . ?
 C32 C33 C35 127.1(6) . . ?
 C31 C34 H34A 109.5 . . ?
 C31 C34 H34B 109.5 . . ?
 C31 C34 H34C 109.5 . . ?
 H34A C34 H34B 109.5 . . ?
 H34A C34 H34C 109.5 . . ?
 H34B C34 H34C 109.5 . . ?
 C33 C35 H35A 109.5 . . ?
 C33 C35 H35B 109.5 . . ?
 C33 C35 H35C 109.5 . . ?
 H35A C35 H35B 109.5 . . ?
 H35A C35 H35C 109.5 . . ?
 H35B C35 H35C 109.5 . . ?
 N1 B1 N5 109.8(4) . . ?
 N1 B1 H1 108.0 . . ?
 N3 B1 N1 112.0(5) . . ?
 N3 B1 N5 110.9(5) . . ?
 N3 B1 H1 108.0 . . ?
 N5 B1 H1 108.0 . . ?
 N7 B2 H2A 107.4 . . ?
 N9 B2 N7 112.9(5) . . ?
 N9 B2 H2A 107.4 . . ?
 N11 B2 N7 110.9(5) . . ?
 N11 B2 N9 110.7(6) . . ?
 N11 B2 H2A 107.4 . . ?
 C37 C36 C42 121.4(12) . . ?
 C41 C36 C37 115.8(11) . . ?
 C41 C36 C42 122.8(10) . . ?
 C36 C37 H37 121.7 . . ?
 C38 C37 C36 116.5(12) . . ?
 C38 C37 H37 121.7 . . ?
 C37 C38 H38 120.4 . . ?
 C39 C38 C37 119.2(11) . . ?
 C39 C38 H38 120.4 . . ?
 C38 C39 H39 116.5 . . ?
 C40 C39 C38 127.0(14) . . ?
 C40 C39 H39 116.5 . . ?
 C39 C40 H40 124.5 . . ?
 C39 C40 C41 111.0(13) . . ?
 C41 C40 H40 124.5 . . ?
 C36 C41 C40 130.4(11) . . ?
 C36 C41 H41 114.8 . . ?
 C40 C41 H41 114.8 . . ?
 C36 C42 H42A 109.5 . . ?
 C36 C42 H42B 109.5 . . ?
 C36 C42 H42C 109.5 . . ?
 H42A C42 H42B 109.5 . . ?
 H42A C42 H42C 109.5 . . ?
 H42B C42 H42C 109.5 . . ?

loop_
  _geom_torsion_atom_site_label_1
  _geom_torsion_atom_site_label_2
  _geom_torsion_atom_site_label_3
  _geom_torsion_atom_site_label_4
  _geom_torsion
  _geom_torsion_site_symmetry_1
  _geom_torsion_site_symmetry_2
  _geom_torsion_site_symmetry_3
  _geom_torsion_site_symmetry_4
  _geom_torsion_publ_flag
 Ce1 N2 C3 C2 -151.6(4) . . . . ?
 Ce1 N2 C3 C5 28.8(9) . . . . ?
 Ce1 N4 C8 C7 -165.5(4) . . . . ?
 Ce1 N4 C8 C10 12.7(8) . . . . ?
 Ce1 N6 C13 C12 173.9(4) . . . . ?
 Ce1 N6 C13 C15 -6.5(9) . . . . ?
 Ce1 N8 C18 C17 -149.5(5) . . . . ?
 Ce1 N8 C18 C20 31.6(8) . . . . ?
 Ce1 N10 C23 C22 177.1(4) . . . . ?
 Ce1 N10 C23 C25 -3.2(8) . . . . ?
 Ce1 N12 C28 C27 168.2(4) . . . . ?
 Ce1 N12 C28 C30 -12.0(9) . . . . ?
 Ce1 N13 N14 C33 174.0(5) . . . . ?
 Ce1 N13 C31 C32 -142(2) . . . . ?
 Ce1 N13 C31 C34 40(3) . . . . ?
 N1 N2 C3 C2 1.5(7) . . . . ?
 N1 N2 C3 C5 -178.2(6) . . . . ?
 N1 C1 C2 C3 -0.9(7) . . . . ?
 N2 N1 C1 C2 1.9(7) . . . . ?
 N2 N1 C1 C4 -177.9(6) . . . . ?
 N2 N1 B1 N3 80.3(6) . . . . ?
 N2 N1 B1 N5 -43.4(8) . . . . ?
 N3 N4 C8 C7 -1.2(6) . . . . ?
 N3 N4 C8 C10 177.0(5) . . . . ?
 N3 C6 C7 C8 -0.4(6) . . . . ?
 N4 N3 C6 C7 -0.3(6) . . . . ?
 N4 N3 C6 C9 179.1(5) . . . . ?
 N4 N3 B1 N1 -54.3(6) . . . . ?
 N4 N3 B1 N5 68.8(6) . . . . ?
 N5 N6 C13 C12 0.1(6) . . . . ?
 N5 N6 C13 C15 179.7(6) . . . . ?
 N5 C11 C12 C13 -0.8(7) . . . . ?
 N6 N5 C11 C12 0.9(7) . . . . ?
 N6 N5 C11 C14 -177.4(6) . . . . ?
 N6 N5 B1 N1 63.1(7) . . . . ?
 N6 N5 B1 N3 -61.3(7) . . . . ?
 N7 N8 C18 C17 0.5(7) . . . . ?
 N7 N8 C18 C20 -178.3(5) . . . . ?
 N7 C16 C17 C18 -0.8(7) . . . . ?
 N8 N7 C16 C17 1.2(7) . . . . ?
 N8 N7 C16 C19 -178.4(6) . . . . ?
 N8 N7 B2 N9 80.6(6) . . . . ?
 N8 N7 B2 N11 -44.2(8) . . . . ?
 N9 N10 C23 C22 0.9(6) . . . . ?
 N9 N10 C23 C25 -179.5(5) . . . . ?
 N9 C21 C22 C23 0.6(7) . . . . ?
 N10 N9 C21 C22 -0.1(7) . . . . ?
 N10 N9 C21 C24 -179.6(6) . . . . ?
 N10 N9 B2 N7 -64.0(7) . . . . ?
 N10 N9 B2 N11 61.0(6) . . . . ?
 N11 N12 C28 C27 -0.9(7) . . . . ?
 N11 N12 C28 C30 178.9(5) . . . . ?
 N11 C26 C27 C28 -0.7(7) . . . . ?
 N12 N11 C26 C27 0.2(7) . . . . ?
 N12 N11 C26 C29 -178.3(6) . . . . ?
 N12 N11 B2 N7 58.3(8) . . . . ?
 N12 N11 B2 N9 -67.8(7) . . . . ?
 N13 N14 C33 C32 -0.4(8) . . . . ?
 N13 N14 C33 C35 177.4(6) . . . . ?
 N13 C31 C32 C33 0.7(8) . . . . ?
 N14 N13 C31 C32 -1.0(8) . . . . ?
 N14 N13 C31 C34 -179.4(6) . . . . ?
 C1 N1 N2 Ce1 157.1(4) . . . . ?
 C1 N1 N2 C3 -2.1(6) . . . . ?
 C1 N1 B1 N3 -106.9(7) . . . . ?
 C1 N1 B1 N5 129.3(6) . . . . ?
 C1 C2 C3 N2 -0.4(7) . . . . ?
 C1 C2 C3 C5 179.2(7) . . . . ?
 C4 C1 C2 C3 178.9(6) . . . . ?
 C6 N3 N4 Ce1 167.1(3) . . . . ?
 C6 N3 N4 C8 1.0(5) . . . . ?
 C6 N3 B1 N1 129.7(5) . . . . ?
 C6 N3 B1 N5 -107.2(6) . . . . ?
 C6 C7 C8 N4 1.1(6) . . . . ?
 C6 C7 C8 C10 -177.0(6) . . . . ?
 C9 C6 C7 C8 -179.8(5) . . . . ?
 C11 N5 N6 Ce1 -175.8(3) . . . . ?
 C11 N5 N6 C13 -0.6(6) . . . . ?
 C11 N5 B1 N1 -123.2(6) . . . . ?
 C11 N5 B1 N3 112.4(6) . . . . ?
 C11 C12 C13 N6 0.4(7) . . . . ?
 C11 C12 C13 C15 -179.2(6) . . . . ?
 C14 C11 C12 C13 177.4(6) . . . . ?
 C16 N7 N8 Ce1 155.3(4) . . . . ?
 C16 N7 N8 C18 -1.1(6) . . . . ?
 C16 N7 B2 N9 -105.3(7) . . . . ?
 C16 N7 B2 N11 129.8(6) . . . . ?
 C16 C17 C18 N8 0.2(8) . . . . ?
 C16 C17 C18 C20 178.9(6) . . . . ?
 C19 C16 C17 C18 178.7(7) . . . . ?
 C21 N9 N10 Ce1 -177.2(4) . . . . ?
 C21 N9 N10 C23 -0.5(6) . . . . ?
 C21 N9 B2 N7 120.3(6) . . . . ?
 C21 N9 B2 N11 -114.7(6) . . . . ?
 C21 C22 C23 N10 -0.9(7) . . . . ?
 C21 C22 C23 C25 179.5(6) . . . . ?
 C24 C21 C22 C23 -179.9(7) . . . . ?
 C26 N11 N12 Ce1 -171.0(4) . . . . ?
 C26 N11 N12 C28 0.4(6) . . . . ?
 C26 N11 B2 N7 -125.0(6) . . . . ?
 C26 N11 B2 N9 108.9(7) . . . . ?
 C26 C27 C28 N12 1.0(7) . . . . ?
 C26 C27 C28 C30 -178.7(6) . . . . ?
 C29 C26 C27 C28 177.7(6) . . . . ?
 C31 N13 N14 Ce1 -173.1(5) . . . . ?
 C31 N13 N14 C33 0.9(7) . . . . ?
 C31 C32 C33 N14 -0.2(9) . . . . ?
 C31 C32 C33 C35 -177.9(7) . . . . ?
 C34 C31 C32 C33 178.9(8) . . . . ?
 B1 N1 N2 Ce1 -29.2(6) . . . . ?
 B1 N1 N2 C3 171.6(5) . . . . ?
 B1 N1 C1 C2 -171.6(5) . . . . ?
 B1 N1 C1 C4 8.6(9) . . . . ?
 B1 N3 N4 Ce1 -9.5(6) . . . . ?
 B1 N3 N4 C8 -175.6(4) . . . . ?
 B1 N3 C6 C7 176.1(5) . . . . ?
 B1 N3 C6 C9 -4.5(8) . . . . ?
 B1 N5 N6 Ce1 -1.3(7) . . . . ?
 B1 N5 N6 C13 173.9(5) . . . . ?
 B1 N5 C11 C12 -173.4(5) . . . . ?
 B1 N5 C11 C14 8.3(9) . . . . ?
 B2 N7 N8 Ce1 -29.7(6) . . . . ?
 B2 N7 N8 C18 173.9(5) . . . . ?
 B2 N7 C16 C17 -173.5(5) . . . . ?
 B2 N7 C16 C19 6.9(10) . . . . ?
 B2 N9 N10 Ce1 6.3(6) . . . . ?
 B2 N9 N10 C23 -177.0(5) . . . . ?
 B2 N9 C21 C22 176.0(6) . . . . ?
 B2 N9 C21 C24 -3.5(10) . . . . ?
 B2 N11 N12 Ce1 6.1(7) . . . . ?
 B2 N11 N12 C28 177.6(6) . . . . ?
 B2 N11 C26 C27 -176.9(6) . . . . ?
 B2 N11 C26 C29 4.6(10) . . . . ?
 C36 C37 C38 C39 3.3(14) . . . . ?
 C37 C36 C41 C40 -3.1(16) . . . . ?
 C37 C38 C39 C40 -4.8(17) . . . . ?
 C38 C39 C40 C41 2.2(16) . . . . ?
 C39 C40 C41 C36 2.0(16) . . . . ?
 C41 C36 C37 C38 0.1(14) . . . . ?
 C42 C36 C37 C38 -179.3(10) . . . . ?
 C42 C36 C41 C40 176.4(10) . . . . ?

_shelx_res_file
;
    adpm60.res created by SHELXL-2014/7

TITL CF solution in P-1
CELL 0.71073 11.126182 14.692022 14.787369 70.0366 85.3022 81.3024
ZERR 2 0.000943 0.001387 0.001432 0.0089 0.0076 0.0074
LATT 1
SFAC C H B Ce N
UNIT 84 118 4 2 28
RIGU C42 C36 C41 C40 C39 C38 C37
ISOR 0.004 0.004 C36

L.S. 10
PLAN  20
FREE N14 C32
FREE N5 N3
FREE N3 N1
BIND N12 Ce1
BOND
CONF
BOND $H
HTAB
MORE -1
CONF
fmap 2
acta
SHEL 100 0.83
OMIT 0 0 3
REM <olex2.extras>
REM <HklSrc "%.\\adpm60.hkl">
REM </olex2.extras>

WGHT    0.049500
FVAR       1.18788
CE1   4    0.688311    0.811193    0.840445    11.00000    0.01915    0.01050 =
         0.01504   -0.00197   -0.00175   -0.00718
N1    5    0.697384    0.560004    0.948575    11.00000    0.02156    0.01327 =
         0.01835   -0.00254   -0.00326   -0.00680
N2    5    0.707870    0.624189    0.856195    11.00000    0.02228    0.01355 =
         0.01927   -0.00398   -0.00516   -0.00481
N3    5    0.636896    0.647590    1.069627    11.00000    0.01825    0.02013 =
         0.01625   -0.00136   -0.00126   -0.01062
N4    5    0.591306    0.736391    1.009595    11.00000    0.02008    0.00369 =
         0.02483    0.00060   -0.00201   -0.00571
N5    5    0.856707    0.621053    1.016595    11.00000    0.01757    0.01162 =
         0.01633    0.00123   -0.00666   -0.00440
N6    5    0.873075    0.709255    0.946518    11.00000    0.01198    0.01076 =
         0.02037    0.00300   -0.00405   -0.00404
N7    5    0.641280    1.061479    0.733475    11.00000    0.02966    0.01366 =
         0.01378   -0.00098   -0.00986   -0.00630
N8    5    0.571003    0.988944    0.780548    11.00000    0.02361    0.01439 =
         0.02205   -0.00293    0.00053   -0.00907
N9    5    0.860380    0.992908    0.706068    11.00000    0.02397    0.01823 =
         0.01986   -0.00326    0.00188   -0.01052
N10   5    0.854458    0.895074    0.728134    11.00000    0.02126    0.01267 =
         0.02012   -0.00284   -0.00135   -0.00626
N11   5    0.794243    1.016323    0.862961    11.00000    0.02034    0.01274 =
         0.01520   -0.00240   -0.00002   -0.00689
N12   5    0.763424    0.927899    0.922180    11.00000    0.02375    0.00714 =
         0.02124   -0.00447   -0.00107   -0.00644
N13   5    0.626599    0.839010    0.681474    11.00000    0.02615    0.02075 =
         0.02151   -0.00633    0.00190   -0.00847
N14   5    0.529563    0.799557    0.735537    11.00000    0.02103    0.01985 =
         0.02773   -0.00121   -0.00755   -0.00432
C1    1    0.663489    0.476788    0.947580    11.00000    0.01488    0.00617 =
         0.03416   -0.00465   -0.00198   -0.00156
C2    1    0.655340    0.485062    0.853720    11.00000    0.01787    0.01854 =
         0.04201   -0.01531   -0.00436   -0.00452
AFIX  43
H2    2    0.634632    0.438064    0.830831    11.00000   -1.20000
AFIX   0
C3    1    0.683449    0.575781    0.799447    11.00000    0.02474    0.01769 =
         0.02865   -0.01460   -0.00424   -0.00397
C4    1    0.640350    0.394241    1.035219    11.00000    0.03188    0.01621 =
         0.04022   -0.00460    0.00219   -0.01462
AFIX 137
H4A   2    0.714625    0.367265    1.068897    11.00000   -1.50000
H4B   2    0.610505    0.344872    1.017519    11.00000   -1.50000
H4C   2    0.580887    0.416954    1.076182    11.00000   -1.50000
AFIX   0
C5    1    0.688748    0.618968    0.693812    11.00000    0.04763    0.02780 =
         0.03405   -0.01315   -0.01002   -0.00391
AFIX 137
H5A   2    0.715207    0.568498    0.666340    11.00000   -1.50000
H5B   2    0.745044    0.666165    0.674761    11.00000   -1.50000
H5C   2    0.609451    0.650413    0.671423    11.00000   -1.50000
AFIX   0
C6    1    0.588751    0.633600    1.158553    11.00000    0.02516    0.02423 =
         0.01735   -0.00352   -0.00098   -0.01304
C7    1    0.511176    0.714825    1.156302    11.00000    0.02690    0.02923 =
         0.02393   -0.01029    0.00847   -0.01695
AFIX  43
H7    2    0.464405    0.725594    1.207656    11.00000   -1.20000
AFIX   0
C8    1    0.515124    0.777830    1.063780    11.00000    0.01980    0.01336 =
         0.02694   -0.00960    0.00448   -0.00762
C9    1    0.618949    0.542284    1.241226    11.00000    0.03641    0.03831 =
         0.02378    0.00186    0.00178   -0.01427
AFIX 137
H9A   2    0.590858    0.488780    1.229523    11.00000   -1.50000
H9B   2    0.579994    0.550005    1.299014    11.00000   -1.50000
H9C   2    0.705459    0.529209    1.248428    11.00000   -1.50000
AFIX   0
C10   1    0.453077    0.877659    1.023013    11.00000    0.03288    0.02607 =
         0.03657   -0.01309    0.01048   -0.00458
AFIX 137
H10A  2    0.500999    0.914170    0.969749    11.00000   -1.50000
H10B  2    0.442725    0.908441    1.071405    11.00000   -1.50000
H10C  2    0.374878    0.875736    1.001188    11.00000   -1.50000
AFIX   0
C11   1    0.956755    0.582966    1.067321    11.00000    0.02201    0.01961 =
         0.01669   -0.00435   -0.00309   -0.00123
C12   1    1.040706    0.647468    1.031500    11.00000    0.01645    0.01981 =
         0.02441   -0.01060   -0.00375   -0.00199
AFIX  43
H12   2    1.118785    0.640923    1.053076    11.00000   -1.20000
AFIX   0
C13   1    0.986578    0.722422    0.958448    11.00000    0.01600    0.02101 =
         0.02201   -0.01130   -0.00257   -0.00687
C14   1    0.971965    0.487234    1.145164    11.00000    0.02769    0.01912 =
         0.02702   -0.00190   -0.00910    0.00051
AFIX 137
H14A  2    0.921374    0.490876    1.199940    11.00000   -1.50000
H14B  2    1.055510    0.470400    1.163098    11.00000   -1.50000
H14C  2    0.948887    0.438270    1.122994    11.00000   -1.50000
AFIX   0
C15   1    1.042873    0.809284    0.897023    11.00000    0.02135    0.02622 =
         0.02709   -0.00531   -0.00402   -0.01409
AFIX 137
H15A  2    1.069083    0.801539    0.836282    11.00000   -1.50000
H15B  2    1.111631    0.815773    0.928495    11.00000   -1.50000
H15C  2    0.984315    0.866720    0.886563    11.00000   -1.50000
AFIX   0
C16   1    0.573619    1.137635    0.675301    11.00000    0.04251    0.02843 =
         0.01432   -0.00315   -0.01048   -0.00480
C17   1    0.457720    1.116811    0.684916    11.00000    0.02880    0.02785 =
         0.02906   -0.00526   -0.01905    0.00715
AFIX  43
H17   2    0.390457    1.157301    0.653340    11.00000   -1.20000
AFIX   0
C18   1    0.459020    1.025762    0.749320    11.00000    0.02497    0.02595 =
         0.01971   -0.00836   -0.00816   -0.00171
C19   1    0.622969    1.227289    0.612185    11.00000    0.05496    0.02254 =
         0.03309    0.00952   -0.01593   -0.00332
AFIX 137
H19A  2    0.659601    1.255745    0.650889    11.00000   -1.50000
H19B  2    0.558173    1.273272    0.576940    11.00000   -1.50000
H19C  2    0.683053    1.210840    0.567902    11.00000   -1.50000
AFIX   0
C20   1    0.354627    0.969133    0.786399    11.00000    0.02635    0.03939 =
         0.03595   -0.01932   -0.00231   -0.00414
AFIX 137
H20A  2    0.384605    0.902474    0.821395    11.00000   -1.50000
H20B  2    0.308552    0.971427    0.733362    11.00000   -1.50000
H20C  2    0.303437    0.996997    0.828340    11.00000   -1.50000
AFIX   0
C21   1    0.953167    1.017751    0.642262    11.00000    0.03821    0.01980 =
         0.02245   -0.00516    0.00804   -0.01222
C22   1    1.005632    0.936533    0.624153    11.00000    0.03161    0.02215 =
         0.02531   -0.00445    0.00630   -0.00741
AFIX  43
H22   2    1.072500    0.932209    0.583054    11.00000   -1.20000
AFIX   0
C23   1    0.942217    0.861176    0.677565    11.00000    0.02237    0.01233 =
         0.01832   -0.00298   -0.00213   -0.00230
C24   1    0.985213    1.118773    0.603716    11.00000    0.05764    0.02769 =
         0.05020   -0.00837    0.03178   -0.02326
AFIX 137
H24A  2    0.913387    1.163899    0.581214    11.00000   -1.50000
H24B  2    1.043700    1.123890    0.551333    11.00000   -1.50000
H24C  2    1.019276    1.133856    0.653677    11.00000   -1.50000
AFIX   0
C25   1    0.959966    0.758045    0.684329    11.00000    0.03882    0.02257 =
         0.03198   -0.00947    0.00485   -0.00522
AFIX 137
H25A  2    0.919386    0.720537    0.741758    11.00000   -1.50000
H25B  2    1.045331    0.734366    0.686509    11.00000   -1.50000
H25C  2    0.926790    0.751776    0.629144    11.00000   -1.50000
AFIX   0
C26   1    0.846629    1.059596    0.913866    11.00000    0.01735    0.01681 =
         0.02553   -0.00730   -0.00309   -0.00842
C27   1    0.850262    0.999100    1.006327    11.00000    0.01755    0.02635 =
         0.02140   -0.00737   -0.00273   -0.00888
AFIX  43
H27   2    0.882147    1.009259    1.057784    11.00000   -1.20000
AFIX   0
C28   1    0.797135    0.919341    1.008843    11.00000    0.01292    0.01811 =
         0.01383   -0.00121   -0.00037   -0.00575
C29   1    0.886871    1.156750    0.870960    11.00000    0.03729    0.02444 =
         0.03329   -0.00800   -0.00382   -0.02011
AFIX 137
H29A  2    0.938423    1.158319    0.815259    11.00000   -1.50000
H29B  2    0.931234    1.169789    0.917217    11.00000   -1.50000
H29C  2    0.817189    1.205473    0.852435    11.00000   -1.50000
AFIX   0
C30   1    0.778651    0.833886    1.096884    11.00000    0.02500    0.02000 =
         0.01940   -0.00153   -0.00832   -0.01075
AFIX 137
H30A  2    0.833692    0.830279    1.145078    11.00000   -1.50000
H30B  2    0.793975    0.774973    1.080965    11.00000   -1.50000
H30C  2    0.696407    0.841491    1.121188    11.00000   -1.50000
AFIX   0
C31   1    0.602241    0.869229    0.589548    11.00000    0.03240    0.02198 =
         0.01513   -0.00212   -0.00867    0.00394
C32   1    0.488347    0.848697    0.580920    11.00000    0.03779    0.03310 =
         0.02011   -0.00380   -0.01258   -0.00184
AFIX  43
H32   2    0.448293    0.861404    0.524249    11.00000   -1.20000
AFIX   0
C33   1    0.445913    0.805719    0.672788    11.00000    0.02956    0.02453 =
         0.02790   -0.00869   -0.00904   -0.00136
C34   1    0.692700    0.914209    0.515049    11.00000    0.04043    0.04920 =
         0.02198    0.00438   -0.00522   -0.01014
AFIX 137
H34A  2    0.753363    0.934254    0.544145    11.00000   -1.50000
H34B  2    0.652767    0.970077    0.466822    11.00000   -1.50000
H34C  2    0.730708    0.867505    0.485804    11.00000   -1.50000
AFIX   0
C35   1    0.328081    0.766823    0.702564    11.00000    0.02196    0.03805 =
         0.06977   -0.00057   -0.01864   -0.01016
AFIX 137
H35A  2    0.267830    0.817109    0.712164    11.00000   -1.50000
H35B  2    0.337290    0.712548    0.761519    11.00000   -1.50000
H35C  2    0.302848    0.745634    0.653285    11.00000   -1.50000
AFIX   0
B1    3    0.734231    0.579656    1.037576    11.00000    0.02654    0.00922 =
         0.01997   -0.00169   -0.00318   -0.00999
AFIX  13
H1    2    0.745394    0.517130    1.090367    11.00000   -1.20000
AFIX   0
B2    3    0.775930    1.054285    0.755328    11.00000    0.02845    0.01473 =
         0.01916   -0.00103   -0.00023   -0.00754
AFIX  13
H2A   2    0.798314    1.120605    0.730443    11.00000   -1.20000
AFIX   0

C36   1    1.042909    0.618622    0.450922    11.00000    0.09083    0.04676 =
         0.07122   -0.01415   -0.00002   -0.01799
C37   1    1.056403    0.622821    0.351354    11.00000    0.18230    0.03195 =
         0.08712   -0.00021    0.00857   -0.03739
AFIX  43
H37   2    1.131803    0.608326    0.323757    11.00000   -1.20000
AFIX   0
C38   1    0.950933    0.649601    0.299318    11.00000    0.17566    0.03252 =
         0.05576   -0.01053    0.01109   -0.03443
AFIX  43
H38   2    0.953233    0.650285    0.236082    11.00000   -1.20000
AFIX   0
C39   1    0.843287    0.675041    0.342278    11.00000    0.18181    0.04513 =
         0.06478   -0.00773    0.00126   -0.03103
AFIX  43
H39   2    0.775973    0.697366    0.303503    11.00000   -1.20000
AFIX   0
C40   1    0.824857    0.671253    0.432948    11.00000    0.13054    0.06085 =
         0.07488   -0.01391   -0.00677   -0.01495
AFIX  43
H40   2    0.749716    0.687216    0.460077    11.00000   -1.20000
AFIX   0
C41   1    0.930882    0.640778    0.481391    11.00000    0.11976    0.02872 =
         0.06817   -0.01355   -0.01155   -0.01817
AFIX  43
H41   2    0.923022    0.634619    0.546244    11.00000   -1.20000
AFIX   0
C42   1    1.148328    0.592182    0.512901    11.00000    0.14269    0.05700 =
         0.16258    0.00660   -0.03681   -0.03168
AFIX 137
H42A  2    1.220678    0.578775    0.477031    11.00000   -1.50000
H42B  2    1.136795    0.535154    0.567343    11.00000   -1.50000
H42C  2    1.156341    0.645355    0.534798    11.00000   -1.50000
AFIX   0
HKLF 4

REM  CF solution in P-1
REM R1 =  0.0642 for    6502 Fo > 4sig(Fo)  and  0.0845 for all    8201 data
REM    547 parameters refined using     51 restraints

END

WGHT      0.0495      0.0000

REM Instructions for potential hydrogen bonds
HTAB C5 N14
HTAB C15 N12
HTAB C20 N14
HTAB C30 N6

REM Highest difference peak  3.588,  deepest hole -1.670,  1-sigma level  0.159
Q1    1   0.7575  0.7588  0.8799  11.00000  0.05    3.59
Q2    1   0.6123  0.8608  0.7975  11.00000  0.05    2.14
Q3    1   0.6664  0.8479  0.7725  11.00000  0.05    1.66
Q4    1   0.6856  0.8611  0.8550  11.00000  0.05    1.01
Q5    1   0.3591  0.7612  0.6371  11.00000  0.05    0.96
Q6    1   0.7531  0.8640  0.7154  11.00000  0.05    0.95
Q7    1   0.6960  0.7616  0.8197  11.00000  0.05    0.93
Q8    1   0.6212  0.7624  0.9542  11.00000  0.05    0.93
Q9    1   1.1523  0.6028  0.3834  11.00000  0.05    0.87
Q10   1   0.5827  0.7712  1.0154  11.00000  0.05    0.75
Q11   1   0.7789  0.6855  0.9143  11.00000  0.05    0.69
Q12   1   1.0954  0.6152  0.4409  11.00000  0.05    0.68
Q13   1   1.0852  0.6007  0.2971  11.00000  0.05    0.67
Q14   1   0.8590  0.7585  0.8833  11.00000  0.05    0.66
Q15   1   0.9161  0.9987  0.9560  11.00000  0.05    0.64
Q16   1   0.5200  0.8439  0.8037  11.00000  0.05    0.61
Q17   1   0.6344  0.8615  1.0818  11.00000  0.05    0.60
Q18   1   0.5403  0.7580  0.8023  11.00000  0.05    0.59
Q19   1   0.5326  0.9025  0.8370  11.00000  0.05    0.57
Q20   1   0.6363  0.7191  0.7870  11.00000  0.05    0.57
;
_shelx_res_checksum               93157
_shelx_hkl_file
;
   0   0   3 1422.31 193.140   6
   0   0   3 1448.94 92.6082   2
   0   0  -3 1655.54 100.758   2
   0   0  -3 1597.75 202.776   6
   0   0  -4 2092.29 267.378   6
   0   0   4 1788.69 116.366   2
   0   0  -4 2003.61 127.228   2
   0   0   4 1901.29 245.844   6
   0   0   5 636.464 75.1899   2
   0   0  -5 817.606 91.6561   2
   0   0  -5 675.484 158.084   6
   0   0  -6 14542.2 828.074   6
   0   0  -6 13899.0 474.516   2
   0   0  -7 7901.25 364.929   2
   0   0  -7 9051.97 689.938   6
   0   0  -7 8252.11 341.933   3
   0   0  -8 1008.82 244.527   6
   0   0  -8 833.526 103.013   3
   0   0  -8 979.579 133.510   2
   0   0  -9 8084.50 729.611   6
   0   0  -9 7384.64 411.149   2
   0   0  -9 8068.81 383.886   3
   0   0 -10 6044.43 346.906   3
   0   0 -10 6201.50 673.576   6
   0   0 -10 5429.95 373.505   2
   0   0 -11 1144.20 165.954   3
   0   0 -11 763.278 140.003   2
   0   0 -11 1035.83 299.848   6
   0   0 -12 4878.60 670.791   6
   0   0 -12 3638.34 345.563   2
   0   0 -13 5055.87 718.832   6
   0   0 -13 4501.58 414.291   2
   0   0 -14 68.4156 47.8182   2
   0   0 -14 127.756 202.015   6
   0   0 -15 681.071 168.246   2
   0   0 -15 1389.79 408.657   6
   0   0 -16 1411.43 459.278   6
   0   0 -16 998.736 228.828   2
   0   0 -17 467.328 313.911   6
   0   0 -18 1479.39 499.264   6
   0   1 -17 2268.84 586.129   6
   0   1 -16 2037.75 547.268   6
   0   1 -15 254.766 129.099   2
   0   1 -15 452.719 259.280   6
   0   1 -14 1461.86 437.587   6
   0   1 -14 923.261 200.673   2
   0   1 -13 1326.64 222.143   2
   0   1 -13 1737.18 437.522   6
   0   1 -12 101.329 130.630   6
   0   1 -12 21.7844 43.7140   2
   0   1 -11 1524.63 389.234   6
   0   1 -11 1388.25 190.266   2
   0   1 -11 1520.64 167.759   3
   0   1 -10 290.560 163.540   6
   0   1 -10 212.788 49.4788   3
   0   1 -10 162.880 61.0550   2
   0   1  -9 23.2769 25.0310   2
   0   1  -9 131.000 146.869   6
   0   1  -8 10925.8 465.262   2
   0   1  -8 12020.1 897.544   6
   0   1  -7 8506.11 376.589   2
   0   1  -7 9750.98 747.975   6
   0   1  -6 2014.06 159.789   2
   0   1  -6 2277.15 336.949   6
   0   1  -5 9583.08 628.320   6
   0  -1   5 7408.22 340.933   2
   0   1  -5 8858.81 330.912   2
   0   1  -4 5596.24 228.676   2
   0  -1   4 4475.52 379.685   6
   0  -1   4 4410.68 233.958   2
   0   1  -4 5523.56 426.974   6
   0   1  -3 1945.66 216.912   6
   0   1  -3 1514.63 107.447   2
   0  -1   3 1647.24 199.503   6
   0  -1   3 1596.82 119.253   2
   0   1  -2 1487.33 172.883   6
   0  -1   2 1352.58 100.958   2
   0  -1   2 1386.92 167.119   6
   0  -1  -3 4774.23 207.720   3
   0   1   3 4478.58 188.574   2
   0   1   3 4866.53 321.620   6
   0  -1  -3 4736.17 304.813   6
   0  -1  -3 4600.54 201.958   2
   0  -1  -4 751.888 135.667   6
   0   1   4 722.864 74.7609   2
   0   1   4 835.730 155.694   6
   0  -1  -4 759.240 84.8653   3
   0  -1  -4 763.672 86.5881   2
   0   1   5 7790.62 296.640   2
   0  -1  -5 8919.25 342.386   3
   0  -1  -5 8167.23 336.057   2
   0   1   5 8643.94 570.905   6
   0  -1  -5 8546.41 540.957   6
   0  -1  -6 2533.46 179.897   3
   0  -1  -6 2313.65 177.728   2
   0   1   6 2005.49 148.843   2
   0  -1  -6 2488.17 318.035   6
   0  -1  -7 515.260 91.4168   2
   0  -1  -7 813.959 108.904   3
   0  -1  -7 802.575 212.582   6
   0  -1  -8 2167.01 338.916   6
   0  -1  -8 1915.69 192.717   2
   0  -1  -8 2217.36 196.528   3
   0  -1  -9 6.02666 41.2111   2
   0  -1  -9-53.7999 73.4807   6
   0  -1  -9 152.587 81.2452   3
   0  -1 -10 2482.01 406.494   6
   0  -1 -10 3001.50 261.661   3
   0  -1 -10 2343.28 246.209   2
   0  -1 -11 7637.39 778.171   6
   0  -1 -11 6341.04 442.648   2
   0  -1 -12 5928.46 449.756   2
   0  -1 -12 6872.30 770.940   6
   0  -1 -13 103.405 184.923   6
   0  -1 -13-76.2509 83.9324   2
   0  -1 -14 498.650 145.666   2
   0  -1 -14 998.324 351.694   6
   0  -1 -15 422.370 131.368   2
   0  -1 -15 821.923 331.061   6
   0  -1 -16 8.53584 143.973   6
   0  -1 -17 1798.34 540.206   6
   0  -1 -18 3204.74 710.370   6
   0   2 -17 785.406 333.759   6
   0   2 -16 846.002 387.324   6
   0   2 -15 4010.33 758.297   6
   0   2 -15 3756.95 417.609   2
   0   2 -14 2892.27 617.517   6
   0   2 -14 2306.98 310.327   2
   0   2 -13 412.982 125.077   2
   0   2 -13 64.5107 159.433   6
   0   2 -12 3937.43 349.199   2
   0   2 -12 4739.72 702.636   6
   0   2 -11 2966.58 281.739   2
   0   2 -11 3588.39 586.426   6
   0   2 -10 30.7366 26.4969   2
   0   2 -10 233.009 206.368   6
   0   2  -9 3754.38 552.525   6
   0   2  -9 3125.85 255.833   2
   0   2  -8 8296.86 410.799   2
   0   2  -8 9770.67 835.915   6
   0   2  -7 22.3550 27.3144   2
   0   2  -7-12.7318 76.0150   6
   0  -2   6 8370.81 249.785   5
   0   2  -6 11544.6 794.203   6
   0   2  -6 11465.4 418.737   2
   0   2  -5 1754.26 281.306   6
   0  -2   5 1441.93 87.1893   5
   0   2  -5 1634.10 142.708   2
   0   2  -4 1191.91 218.390   6
   0  -2   4 1011.55 123.066   2
   0   2  -4 1128.35 125.190   2
   0   2  -3 1820.12 239.405   6
   0   2  -3 938.105 273.024   4
   0   2  -3 1932.00 152.337   2
   0   2  -2-0.73699 97.8570   4
   0   2  -2 343.513 65.7852   2
   0   2  -1 7007.61 595.747   4
   0   2   2 104.805 62.9150   6
   0   2   2 54.8834 37.6147   4
   0  -2  -3 229.615 79.5953   6
   0   2   3 192.183 81.5742   6
   0   2   3 247.039 73.7415   3
   0   2   4 31801.7 853.500   3
   0   2   4 31921.3 832.975   2
   0  -2  -4 29488.6 1036.21   6
   0   2   4 32722.5 1103.73   6
   0  -2  -4 33341.0 873.979   3
   0  -2  -5 2838.16 210.235   3
   0   2   5 2691.56 307.245   6
   0  -2  -5 2500.23 285.455   6
   0   2   5 2495.39 177.220   2
   0  -2  -6 4423.43 279.047   2
   0  -2  -6 4580.70 173.101   5
   0  -2  -6 4318.87 406.756   6
   0  -2  -6 5102.16 295.795   3
   0  -2  -7 16394.9 615.658   2
   0  -2  -7 14632.4 387.302   5
   0  -2  -7 19191.7 648.229   3
   0  -2  -7 17381.0 913.283   6
   0  -2  -8 64.2731 18.3357   5
   0  -2  -8 77.4990 102.534   6
   0  -2  -8 348.379 107.136   3
   0  -2  -8 83.8991 73.4081   2
   0  -2  -9 1494.77 190.997   2
   0  -2  -9 1655.51 312.785   6
   0  -2  -9 2036.55 218.423   3
   0  -2 -10 6128.07 634.637   6
   0  -2 -10 5219.17 389.559   2
   0  -2 -11 3589.97 528.459   6
   0  -2 -11 3296.10 323.432   2
   0  -2 -12 927.819 167.443   2
   0  -2 -12 352.986 192.018   6
   0  -2 -13 3364.21 562.963   6
   0  -2 -14 827.506 338.760   6
   0  -2 -15 178.121 217.244   6
   0  -2 -16 2894.07 626.889   6
   0  -2 -17 1494.80 432.272   6
   0  -2 -18 486.806 301.381   6
   0   3 -17 1442.21 578.259   6
   0   3 -16 1589.00 525.703   6
   0   3 -15 724.886 372.457   6
   0   3 -14 470.668 329.695   6
   0   3 -14 140.390 77.8954   2
   0   3 -13 3324.50 350.461   2
   0   3 -13 3819.21 674.942   6
   0   3 -12 3121.74 314.184   2
   0   3 -12 3295.17 634.536   6
   0   3 -11 2088.46 244.100   2
   0   3 -11 2585.71 531.890   6
   0   3 -10 1653.19 410.029   6
   0   3 -10 1608.69 198.370   2
   0   3  -9 644.662 122.124   2
   0   3  -9 986.644 304.997   6
   0  -3   8 96.4865 22.5382   5
   0   3  -8 153.435 143.162   6
   0   3  -8 199.336 65.6381   2
   0   3  -7 9194.74 421.024   2
   0   3  -7 9351.62 801.309   6
   0  -3   7 7601.77 264.430   5
   0  -3   6 1804.80 116.285   5
   0   3  -6 1768.33 181.510   2
   0   3  -6 1962.29 339.437   6
   0  -3   5 359.753 63.5120   5
   0   3  -5 224.913 99.7499   6
   0   3  -5 314.476 82.8010   2
   0   3  -4 8080.13 613.279   6
   0   3  -4 7793.89 389.785   2
   0   3  -3 15268.2 826.460   6
   0   3  -3 14899.0 573.898   2
   0   3  -2 918.571 294.476   4
   0  -3   2 1131.10 356.685   4
   0  -3   1 9129.46 884.343   4
   0   3  -1 10240.3 841.471   4
   0   3   0 5059.16 516.309   4
   0  -3   0 4804.67 556.632   4
   0   3   1 2613.54 311.556   4
   0  -3  -1 2890.28 354.322   4
   0  -3  -2 12769.1 580.195   4
   0   3   2 13481.9 584.967   4
   0   3   2 10935.0 603.621   6
   0  -3  -3 10443.9 575.438   6
   0  -3  -3 11338.6 516.509   4
   0   3   3 13703.0 543.573   4
   0   3   3 11841.1 614.485   6
   0  -3  -4 38634.5 1308.63   6
   0  -3  -4 42982.4 1175.36   4
   0   3   4 42882.8 1377.61   6
   0   3   4 43115.8 1158.14   3
   0  -3  -5 85.5460 101.111   6
   0   3   5 44.2399 41.3283   3
   0   3   5 36.8197 38.2272   2
   0   3   6 8942.42 424.572   3
   0  -3  -6 7913.74 574.681   6
   0  -3  -7 1870.96 287.388   6
   0  -3  -8 5414.12 222.264   5
   0  -3  -8 5102.39 512.457   6
   0  -3  -9 10286.8 773.253   6
   0  -3  -9 8622.52 289.175   5
   0  -3 -10 1109.86 81.0788   5
   0  -3 -10 1306.39 293.159   6
   0  -3 -11 733.034 249.383   6
   0  -3 -11 335.240 36.7546   5
   0  -3 -12 5173.34 650.165   6
   0  -3 -13 174.123 155.912   6
   0  -3 -14 2476.71 500.566   6
   0  -3 -15 913.125 332.109   6
   0  -3 -16 682.525 321.827   6
   0  -3 -17 80.4597 176.095   6
   0  -3 -18 1475.10 511.946   6
   0   4 -16 797.028 403.358   6
   0   4 -15 1792.84 552.047   6
   0   4 -14 1207.85 227.928   2
   0   4 -14 1712.47 526.632   6
   0   4 -13 1252.09 411.775   6
   0   4 -13 903.166 178.432   2
   0   4 -12 301.479 212.100   6
   0   4 -12 32.3595 61.0157   2
   0   4 -11 6316.98 860.332   6
   0   4 -11 5547.31 413.399   2
   0   4 -10 121.883 154.195   6
   0   4 -10 10.4380 51.7902   2
   0  -4   9 672.847 67.7901   5
   0   4  -9 1076.54 162.304   2
   0   4  -9 1156.84 335.904   6
   0   4  -8 3917.94 298.409   2
   0  -4   8 3219.19 178.713   5
   0   4  -8 3961.64 583.046   6
   0   4  -7 5430.79 625.028   6
   0  -4   7 5062.34 237.961   5
   0   4  -7 4449.19 328.171   2
   0   4  -6 1084.29 261.549   6
   0  -4   6 1314.17 122.854   5
   0   4  -6 1366.88 189.328   2
   0  -4   5 14884.8 484.452   5
   0   4  -5 15576.2 991.095   6
   0   4  -5 16188.4 667.049   2
   0   4  -4 6134.83 589.755   6
   0   4  -4 6224.58 386.637   2
   0  -4   3 241.758 249.535   4
   0   4  -3 111.634 53.0694   2
   0  -4   2 12461.2 1226.89   4
   0   4  -1 5724.38 681.954   4
   0  -4   1 5422.66 774.764   4
   0  -4   0 5377.62 676.882   4
   0   4   0 4538.07 558.381   4
   0   4   1 49575.4 1827.36   4
   0  -4  -1 47453.5 1935.01   4
   0  -4  -2 189.431 115.024   4
   0   4   2 98.9575 141.689   6
   0   4   2 305.308 112.833   4
   0  -4  -3 2682.11 348.140   6
   0   4   3 4487.51 437.009   6
   0  -4  -3 4357.14 369.002   4
   0   4   3 5151.13 390.974   4
   0  -4  -4 5436.02 388.500   4
   0  -4  -4 5399.79 469.595   6
   0   4   4 5547.79 374.347   3
   0   4   4 6081.65 495.388   6
   0  -4  -5 7558.34 549.279   6
   0  -4  -5 7247.93 447.602   4
   0  -4  -6 7082.96 545.297   6
   0  -4  -7 4131.67 438.333   6
   0  -4  -8 16501.7 974.612   6
   0  -4  -8 17687.4 539.926   5
   0  -4  -9 569.092 194.431   6
   0  -4  -9 643.347 86.6495   5
   0  -4 -10 2237.44 386.130   6
   0  -4 -10 2088.43 143.354   5
   0  -4 -11 5080.89 225.718   5
   0  -4 -11 5915.15 667.101   6
   0  -4 -12 1526.06 369.465   6
   0  -4 -12 829.956 74.4010   5
   0  -4 -13 2901.44 519.994   6
   0  -4 -14 4772.56 681.606   6
   0  -4 -15 1200.69 367.917   6
   0  -4 -16 268.356 251.376   6
   0  -4 -17 1127.65 417.869   6
   0  -4 -18 1319.69 473.738   6
   0   5 -16 1494.98 611.491   6
   0   5 -15 2856.67 740.817   6
   0   5 -14 527.394 383.602   6
   0   5 -13 667.982 345.544   6
   0   5 -13 722.130 171.031   2
   0   5 -12 1409.66 450.159   6
   0   5 -12 1589.24 239.021   2
   0   5 -11 1920.98 526.744   6
   0   5 -11 1286.01 200.118   2
   0   5 -10 1170.13 370.313   6
   0   5 -10 1301.41 194.520   2
   0   5  -9 3888.90 638.658   6
   0   5  -9 4004.99 330.301   2
   0  -5   8 1658.14 138.582   5
   0   5  -8 2390.85 476.406   6
   0   5  -8 2031.38 240.335   2
   0  -5   7 3814.64 233.014   5
   0   5  -7 3838.42 346.791   2
   0   5  -7 4219.48 579.738   6
   0   5  -6 9845.41 867.772   6
   0  -5   6 8964.79 388.014   5
   0   5  -6 9817.30 557.356   2
   0   5  -5 1781.94 224.070   2
   0   5  -5 1851.30 358.528   6
   0  -5   5 1627.20 156.510   5
   0   5  -4 38.3493 67.8594   2
   0  -5   3 2805.41 701.176   4
   0  -5   2 2366.04 619.182   4
   0  -5   1 1966.93 556.792   4
   0  -5   0 22045.2 1575.80   4
   0   5   1 5934.25 637.982   4
   0  -5  -1 5827.58 708.265   4
   0   5   2 2648.71 382.501   4
   0  -5  -2 1950.67 366.412   4
   0   5   3 21427.3 977.269   4
   0   5   3 17419.5 1010.31   6
   0  -5  -3 16501.8 947.457   4
   0   5   4 14783.8 742.192   4
   0  -5  -4 12183.1 689.214   4
   0  -5  -5 627.750 147.513   4
   0  -5  -5 532.249 182.478   6
   0  -5  -6 4545.02 384.920   4
   0  -5  -6 4065.25 437.593   6
   0  -5  -7 795.133 166.563   4
   0  -5  -7 904.248 223.426   6
   0  -5  -8 1151.00 200.717   4
   0  -5  -8 859.650 198.492   6
   0  -5  -9 718.560 207.153   6
   0  -5  -9 1114.81 138.065   5
   0  -5 -10 3782.01 235.900   5
   0  -5 -10 3366.47 464.170   6
   0  -5 -11 2001.73 381.124   6
   0  -5 -11 2181.60 166.910   5
   0  -5 -12 616.576 219.098   6
   0  -5 -12 462.665 64.5118   5
   0  -5 -13 6347.91 771.850   6
   0  -5 -14 609.451 262.593   6
   0  -5 -15 1061.66 367.184   6
   0  -5 -16 1885.83 480.151   6
   0  -5 -17 426.924 300.976   6
   0  -5 -18 714.590 330.968   6
   0   6 -15 510.589 319.142   6
   0   6 -14 2700.03 699.977   6
   0   6 -13 2163.86 612.652   6
   0   6 -13 2764.36 343.839   2
   0   6 -12 271.351 283.410   6
   0   6 -12 95.7038 77.2925   2
   0   6 -11 2562.41 599.463   6
   0   6 -11 2177.32 277.628   2
   0   6 -10 2833.83 590.230   6
   0   6 -10 2669.80 300.347   2
   0   6  -9 62.5210 127.916   6
   0   6  -9 45.6719 66.2351   2
   0   6  -8 1040.65 336.549   6
   0   6  -8 1106.54 198.734   2
   0  -6   8 736.525 101.580   5
   0  -6   7 7536.72 382.188   5
   0   6  -7 8740.80 914.587   6
   0   6  -7 8664.27 578.631   2
   0   6  -6 809.353 285.381   6
   0  -6   6 825.966 122.922   5
   0   6  -6 928.708 169.629   2
   0  -6   5 8056.56 400.860   5
   0   6  -5 8812.13 840.730   6
   0   6  -5 8805.51 565.232   2
   0   6  -4 17561.1 854.924   2
   0  -6   3 8457.52 1252.29   4
   0  -6   1 5986.71 959.205   4
   0  -6   0 6566.28 933.305   4
   0  -6  -1 2116.32 463.206   4
   0  -6  -2 20655.2 1391.99   4
   0  -6  -3 6137.89 672.920   4
   0   6   3 4800.64 208.594   1
   0  -6  -4 1448.68 275.230   4
   0  -6  -5 9478.51 779.180   6
   0  -6  -5 14124.2 798.152   4
   0  -6  -6 14436.0 791.678   4
   0  -6  -6 11898.7 846.906   6
   0  -6  -7 709.440 91.7846   1
   0  -6  -7 727.597 166.981   4
   0  -6  -7 812.519 241.476   6
   0  -6  -8 3620.61 460.876   6
   0  -6  -8 3988.60 269.884   1
   0  -6  -8 3370.25 368.699   4
   0  -6  -9 758.069 188.375   4
   0  -6  -9 921.269 234.856   6
   0  -6  -9 797.418 139.427   1
   0  -6 -10 1671.00 178.934   5
   0  -6 -10 1186.22 280.845   6
   0  -6 -10 1328.55 244.879   4
   0  -6 -11 214.864 82.5671   5
   0  -6 -11 125.839 103.655   4
   0  -6 -11 209.223 185.628   6
   0  -6 -12 5791.65 315.641   5
   0  -6 -12 5059.99 639.303   6
   0  -6 -13 255.995 156.062   6
   0  -6 -14 2241.75 485.596   6
   0  -6 -15 3028.81 570.478   6
   0  -6 -16 1016.44 361.294   6
   0  -6 -17 1215.96 423.411   6
   0  -6 -18 1800.62 494.361   6
   0   7 -15 1498.89 583.202   6
   0   7 -14 1517.96 542.691   6
   0   7 -13 85.6011 274.691   6
   0   7 -12 2850.89 350.552   2
   0   7 -12 2965.66 694.226   6
   0   7 -11 4229.45 797.421   6
   0   7 -11 4333.61 411.713   2
   0   7 -10 22.8122 72.8431   2
   0   7 -10 106.320 246.941   6
   0   7  -9 4235.41 721.899   6
   0   7  -9 2710.33 319.113   2
   0  -7   8 2074.34 208.191   5
   0   7  -8 2706.49 560.464   6
   0   7  -8 2686.46 339.659   2
   0   7  -7 1613.89 403.166   6
   0  -7   7 1008.36 141.842   5
   0   7  -7 1293.26 228.311   2
   0   7  -6 344.033 130.088   2
   0  -7   6 350.525 103.804   5
   0   7  -6 313.053 170.739   6
   0  -7   5 3444.49 283.834   5
   0   7  -5 3535.78 376.356   2
   0   7  -5 3518.43 559.439   6
   0   7  -4 1031.09 199.326   2
   0  -7   3 3381.59 878.740   4
   0  -7   1 647.735 440.628   4
   0  -7   0 1722.27 538.988   4
   0  -7  -1 4074.96 755.852   4
   0  -7  -2 3293.84 613.101   4
   0   7   2 2599.53 211.303   1
   0  -7  -3 1066.01 310.773   4
   0   7   3 1054.28 111.375   1
   0  -7  -4 9907.54 876.015   4
   0  -7  -5 13493.6 919.656   4
   0  -7  -6 685.747 241.269   6
   0  -7  -6 1334.85 256.566   4
   0  -7  -7 10283.9 712.446   4
   0  -7  -7 8771.07 787.905   6
   0  -7  -8 6586.84 560.748   4
   0  -7  -8 5815.36 266.726   1
   0  -7  -8 5630.08 621.643   6
   0  -7  -9 1899.86 296.939   4
   0  -7  -9 2191.72 379.801   6
   0  -7  -9 1895.08 180.430   1
   0  -7 -10 3565.32 520.633   6
   0  -7 -10 3285.26 406.225   4
   0  -7 -10 4827.53 327.497   5
   0  -7 -10 3802.02 304.320   1
   0  -7 -11 42.0188 55.5878   4
   0  -7 -11 81.1560 155.228   6
   0  -7 -11 152.021 80.9191   5
   0  -7 -12 72.6911 62.5923   4
   0  -7 -12 50.8846 46.7642   5
   0  -7 -12 278.841 159.020   6
   0  -7 -13 4352.15 504.952   4
   0  -7 -13 4868.31 669.501   6
   0  -7 -13 5309.91 324.603   5
   0  -7 -14 4550.81 531.090   4
   0  -7 -14 5103.59 717.101   6
   0  -7 -15 321.433 230.770   6
   0  -7 -15 255.276 140.712   4
   0  -7 -16 407.244 278.588   6
   0  -7 -16 294.079 146.364   4
   0  -7 -17 3318.69 669.643   6
   0  -7 -17 2805.61 480.098   4
   0  -7 -18 363.483 205.029   4
   0  -7 -18 278.974 315.553   6
   0  -7 -19 865.647 310.620   4
   0  -7 -20 1204.70 368.721   4
   0   8 -14 20.7863 298.635   6
   0   8 -13 1123.41 487.986   6
   0   8 -12 3699.72 405.875   2
   0   8 -12 4090.55 822.346   6
   0   8 -11 117.997 77.3407   2
   0   8 -11 64.7948 168.048   6
   0   8 -10 4500.90 442.129   2
   0   8 -10 4641.57 802.938   6
   0   8  -9 1884.09 302.552   2
   0   8  -9 2219.83 549.069   6
   0   8  -8 240.360 128.109   2
   0   8  -8 224.520 191.060   6
   0  -8   7-13.6507 44.4619   5
   0   8  -7 47.8640 67.1926   2
   0   8  -7-4.59699 167.788   6
   0  -8   6 108.913 91.1207   5
   0   8  -6 87.0083 71.5794   2
   0   8  -6 163.724 155.917   6
   0  -8   5 672.781 154.582   5
   0   8  -5 479.246 264.145   6
   0   8  -5 366.843 151.338   2
   0  -8   4 3947.78 325.860   5
   0  -8   4 1848.90 735.351   4
   0  -8   3 8681.06 1489.24   4
   0  -8   1 2406.84 738.093   4
   0  -8   0 796.443 423.509   4
   0  -8  -1 2427.46 638.055   4
   0  -8  -2 3589.30 708.750   4
   0   8   2 3015.72 251.048   1
   0   8   3 8416.02 379.839   1
   0  -8  -3 9223.77 1050.52   4
   0  -8  -4 2145.12 473.413   4
   0  -8  -5 2588.46 459.673   4
   0  -8  -6 4702.49 564.047   4
   0  -8  -7 1260.50 272.039   4
   0  -8  -7 449.424 168.372   6
   0  -8  -8 390.353 166.855   4
   0  -8  -8 277.215 179.760   6
   0  -8  -9 8525.25 825.424   6
   0  -8  -9 6753.33 273.727   1
   0  -8  -9 10833.4 774.742   4
   0  -8 -10 3207.36 295.499   5
   0  -8 -10 2043.81 180.209   1
   0  -8 -10 2092.78 417.977   6
   0  -8 -10 2397.79 365.505   4
   0  -8 -11 1867.41 329.010   4
   0  -8 -11 1753.86 412.243   6
   0  -8 -11 2543.67 260.771   5
   0  -8 -12 2688.75 268.303   5
   0  -8 -12 2045.94 350.004   4
   0  -8 -12 2220.88 442.306   6
   0  -8 -13 297.096 129.401   4
   0  -8 -13 432.528 104.371   5
   0  -8 -13 924.008 312.827   6
   0  -8 -14 85.9122 99.2745   4
   0  -8 -14 271.176 197.104   6
   0  -8 -15 1741.01 352.342   4
   0  -8 -15 2211.80 523.930   6
   0  -8 -16 1837.60 379.642   4
   0  -8 -16 2272.85 534.801   6
   0  -8 -17 660.892 321.912   6
   0  -8 -17 174.725 125.060   4
   0  -8 -18 827.085 279.033   4
   0  -8 -18 1332.28 479.407   6
   0  -8 -19 977.148 309.434   4
   0  -8 -20 29.6203 86.7722   4
   0   9 -13 1321.80 503.084   6
   0   9 -12 432.220 378.139   6
   0   9 -11 2051.29 307.922   2
   0   9 -11 1638.40 533.265   6
   0   9 -10 4548.76 463.747   2
   0   9 -10 4160.86 799.620   6
   0   9  -9 1095.94 262.020   2
   0   9  -9 1304.52 425.042   6
   0   9  -8 4907.85 840.832   6
   0   9  -8 3556.17 445.803   2
   0   9  -7 3840.03 740.127   6
   0   9  -7 4521.37 491.811   2
   0  -9   7 3471.72 315.555   5
   0   9  -6 311.775 159.119   2
   0   9  -6 678.684 348.414   6
   0  -9   6 148.894 72.0597   5
   0  -9   5 2544.88 285.332   5
   0   9  -5 3050.41 413.322   2
   0  -9   4 4443.19 365.126   5
   0  -9   4 1186.95 720.391   4
   0  -9   3 377.810 389.724   4
   0  -9   1 10511.8 1628.86   4
   0  -9   0 747.056 493.448   4
   0  -9  -1 2697.65 707.272   4
   0   9   2 6118.19 394.884   1
   0  -9  -2 6626.47 1040.82   4
   0  -9  -3 6959.37 1010.46   4
   0   9   3 6600.50 363.089   1
   0   9   4 33.1969 33.9598   1
   0  -9  -4 135.204 190.892   4
   0  -9  -5 3549.51 607.946   4
   0  -9  -6 1901.61 414.387   4
   0  -9  -7 813.387 247.291   4
   0  -9  -8 1742.29 393.451   6
   0  -9  -8 4108.77 524.684   4
   0  -9  -9 4770.24 688.985   6
   0  -9  -9 5614.76 596.453   4
   0  -9 -10 859.529 196.082   5
   0  -9 -10 497.615 185.952   4
   0  -9 -10 600.487 246.722   6
   0  -9 -11 5939.18 422.133   5
   0  -9 -11 3494.18 580.777   6
   0  -9 -11 4321.05 536.847   4
   0  -9 -12 1974.79 369.944   4
   0  -9 -12 3194.91 304.363   5
   0  -9 -12 1813.01 420.271   6
   0  -9 -13 85.6967 76.3842   4
   0  -9 -13 197.641 168.320   6
   0  -9 -13 70.3609 78.8962   5
   0  -9 -14 2344.88 406.014   4
   0  -9 -14 2723.92 549.392   6
   0  -9 -15 1696.23 373.018   4
   0  -9 -15 1749.29 467.083   6
   0  -9 -16-63.4915 82.4412   4
   0  -9 -16 183.422 200.532   6
   0  -9 -17 419.460 201.240   4
   0  -9 -17 340.187 247.466   6
   0  -9 -18 1433.02 518.475   6
   0  -9 -18 617.020 231.185   4
   0  -9 -19-1.80779 76.7741   4
   0  -9 -20 549.594 247.316   4
   0  10 -12 2471.05 696.200   6
   0  10 -11 1720.35 594.283   6
   0  10 -11 2091.90 330.100   2
   0  10 -10 100.984 94.7772   2
   0  10 -10 461.433 323.735   6
   0  10  -9 3708.62 482.004   2
   0  10  -9 4127.35 788.443   6
   0  10  -8 1892.64 346.747   2
   0  10  -8 1987.47 569.839   6
   0  10  -7 230.310 131.639   2
   0  10  -7 369.384 278.355   6
   0 -10   6 4015.66 368.740   5
   0  10  -6 3906.77 486.826   2
   0  10  -6 3665.87 713.017   6
   0 -10   5 4782.68 407.634   5
   0  10  -5 4863.92 555.057   2
   0 -10   4 19.5209 205.890   4
   0 -10   4 432.615 153.420   5
   0 -10   3 4766.81 1284.45   4
   0 -10   3 8246.82 533.183   5
   0 -10   2 737.433 572.344   4
   0 -10   1-44.0212 189.713   4
   0 -10   0 2233.62 792.338   4
   0 -10  -1 6104.64 1165.97   4
   0 -10  -2 289.751 318.681   4
   0  10   3 1185.00 165.401   1
   0 -10  -3 1386.06 512.274   4
   0 -10  -4 1524.43 437.449   4
   0  10   4 1488.81 160.545   1
   0 -10  -5 1157.43 370.186   4
   0 -10  -6 3508.48 632.651   4
   0 -10  -7 7020.71 849.244   4
   0 -10  -8 2450.26 452.249   4
   0 -10  -9 1281.80 311.594   4
   0 -10 -10 3243.99 584.484   6
   0 -10 -10 5032.53 606.280   4
   0 -10 -11 2834.96 319.608   5
   0 -10 -11 1589.28 333.223   4
   0 -10 -11 1493.28 401.821   6
   0 -10 -12 27.7656 65.6836   4
   0 -10 -12 132.528 105.170   5
   0 -10 -12 202.252 225.075   6
   0 -10 -13 2191.19 503.980   6
   0 -10 -13 3150.77 332.961   5
   0 -10 -13 1966.35 406.032   4
   0 -10 -14 1386.74 335.399   4
   0 -10 -14 1922.78 510.609   6
   0 -10 -14 2502.78 292.233   5
   0 -10 -15 373.204 158.086   4
   0 -10 -15 471.918 291.725   6
   0 -10 -16 2196.01 432.939   4
   0 -10 -16 2650.07 610.049   6
   0 -10 -17 427.814 189.905   4
   0 -10 -17 592.279 325.504   6
   0 -10 -18 616.695 361.793   6
   0 -10 -18 80.8311 82.0214   4
   0 -10 -19 661.610 281.088   4
   0  11 -11 380.447 300.442   6
   0  11 -10 2330.79 381.890   2
   0  11 -10 2532.94 655.333   6
   0  11  -9 2069.78 666.203   6
   0  11  -9 1238.28 316.486   2
   0  11  -8 532.296 313.298   6
   0  11  -8 1185.96 291.664   2
   0  11  -7 2640.19 637.792   6
   0  11  -7 3587.83 482.162   2
   0 -11   6 1860.80 265.333   5
   0  11  -6 2452.37 409.007   2
   0  11  -6 2857.89 643.278   6
   0 -11   5 59.0632 66.8624   5
   0  11  -5-70.0444 112.479   2
   0 -11   4 1381.29 244.343   5
   0 -11   4 419.081 518.342   4
   0 -11   3 3958.43 1244.42   4
   0 -11   3 4965.66 430.622   5
   0 -11   2 454.693 536.953   4
   0 -11   2 1699.24 270.410   5
   0 -11   1 5430.57 1318.86   4
   0 -11   0 4551.80 1191.52   4
   0 -11  -1 609.851 440.014   4
   0 -11  -2 3258.08 832.932   4
   0  11   3 2754.12 277.040   1
   0 -11  -3 3099.49 818.750   4
   0  11   4-7.95193 37.5944   1
   0 -11  -4 25.7248 162.836   4
   0 -11  -5 650.996 361.051   4
   0 -11  -6 9657.74 1161.40   4
   0 -11  -7 2502.85 557.279   4
   0 -11  -8 879.013 309.257   4
   0 -11  -9 3457.65 582.275   4
   0 -11 -10 735.143 285.601   4
   0 -11 -10 1018.44 229.172   5
   0 -11 -11 1994.46 287.947   5
   0 -11 -11 643.419 246.259   6
   0 -11 -11 1561.30 360.912   4
   0 -11 -12 2548.83 316.633   5
   0 -11 -12 1575.41 369.014   4
   0 -11 -12 1097.07 377.716   6
   0 -11 -13 1873.53 271.752   5
   0 -11 -13 759.337 318.891   6
   0 -11 -13 1556.10 358.412   4
   0 -11 -14-86.3459 120.962   4
   0 -11 -14 29.5871 80.5502   5
   0 -11 -15 3133.15 532.177   4
   0 -11 -15 3420.81 697.432   6
   0 -11 -16 1059.18 324.570   4
   0 -11 -16 1648.26 498.278   6
   0 -11 -17 1170.52 443.259   6
   0 -11 -17 735.734 282.167   4
   0 -11 -18 1566.75 401.905   4
   0 -11 -19 1007.72 340.459   4
   0  12  -9 1250.00 323.586   2
   0  12  -9 1074.82 484.916   6
   0  12  -8 1556.52 505.628   6
   0  12  -8 2288.79 410.125   2
   0  12  -7 491.348 199.453   2
   0  12  -7 594.271 346.806   6
   0 -12   6 54.6605 71.0555   5
   0  12  -6 333.390 325.387   6
   0  12  -6 217.860 118.975   2
   0  12  -5 2112.27 395.394   2
   0 -12   5 2295.53 313.728   5
   0 -12   4 1552.87 268.835   5
   0 -12   3 726.665 638.431   4
   0 -12   3 619.895 189.917   5
   0 -12   2 4142.46 1326.59   4
   0 -12   2 6303.72 508.829   5
   0 -12   1 4597.83 448.772   5
   0 -12   1 2612.43 1015.06   4
   0 -12   0 446.966 577.966   4
   0 -12  -1 2542.56 865.806   4
   0 -12  -2 3439.40 988.315   4
   0 -12  -3 899.226 544.784   4
   0 -12  -4 2191.48 688.357   4
   0 -12  -5 918.225 418.758   4
   0 -12  -6 190.434 227.580   4
   0 -12  -7 1651.05 502.347   4
   0 -12  -8 2823.80 610.703   4
   0 -12  -9 338.621 199.282   5
   0 -12  -9 36.7923 176.262   4
   0 -12 -10 6332.68 516.626   5
   0 -12 -10 4192.48 692.508   4
   0 -12 -11 5346.09 737.176   4
   0 -12 -11 6433.97 522.202   5
   0 -12 -12 386.871 227.401   4
   0 -12 -12 405.497 161.285   5
   0 -12 -13 301.233 186.537   4
   0 -12 -13 319.091 137.735   5
   0 -12 -13-176.789 142.030   6
   0 -12 -14 378.740 135.290   5
   0 -12 -14 559.199 335.262   6
   0 -12 -14 360.062 218.329   4
   0 -12 -15 379.968 218.389   4
   0 -12 -15 287.514 268.065   6
   0 -12 -16 472.224 255.474   6
   0 -12 -16 648.021 255.497   4
   0 -12 -17 2823.27 668.852   6
   0 -12 -17 2421.78 505.787   4
   0 -12 -18 655.414 289.988   4
   0 -12 -19 489.947 219.954   4
   0  13  -9 2862.53 525.880   2
   0  13  -8 616.377 258.889   2
   0  13  -8 772.791 380.000   6
   0  13  -7 330.672 182.177   2
   0  13  -7 794.557 600.099   6
   0  13  -6 4081.14 870.527   6
   0  13  -6 3448.36 541.363   2
   0  13  -5 1065.17 304.442   2
   0 -13   5 763.028 208.111   5
   0  13  -5 1643.24 591.472   6
   0  13  -4 250.274 129.616   2
   0 -13   4 159.520 97.7773   5
   0 -13   3 975.758 740.226   4
   0 -13   3 1690.93 288.697   5
   0 -13   2 1678.99 298.855   5
   0 -13   2 1679.39 943.273   4
   0 -13   1 594.555 208.684   5
   0 -13   0 1583.40 778.991   4
   0 -13   0 3119.26 385.369   5
   0 -13  -1 2181.11 1001.04   4
   0 -13  -1 4472.03 456.421   5
   0 -13  -2-41.7668 273.191   4
   0 -13  -3 6789.68 1382.24   4
   0 -13  -4 2253.56 760.174   4
   0 -13  -5 142.620 244.466   4
   0 -13  -6 1172.05 528.784   4
   0 -13  -7 2526.75 658.764   4
   0 -13  -8 477.145 217.119   5
   0 -13  -8 359.152 306.367   4
   0 -13  -9 5180.61 493.066   5
   0 -13  -9 3796.48 728.174   4
   0 -13 -10 5717.30 512.451   5
   0 -13 -10 3972.66 726.548   4
   0 -13 -11 68.8123 172.449   4
   0 -13 -11 297.930 178.252   5
   0 -13 -12 1901.06 311.165   5
   0 -13 -12 708.323 285.106   4
   0 -13 -13 1974.05 482.078   4
   0 -13 -13 2669.13 350.985   5
   0 -13 -14 334.116 130.384   5
   0 -13 -14 528.636 274.539   4
   0 -13 -15 297.736 254.996   4
   0 -13 -15 356.456 250.948   6
   0 -13 -16 1798.83 454.928   4
   0 -13 -16 713.800 329.561   6
   0 -13 -17 1151.19 385.450   4
   0 -13 -18 520.073 299.624   4
   0  14  -8 1210.79 353.222   2
   0  14  -7 1913.90 388.487   2
   0  14  -6 552.221 240.961   2
   0  14  -6 168.764 257.133   6
   0 -14   5 1389.66 250.316   5
   0  14  -5 1969.21 631.886   6
   0  14  -5 2226.96 453.770   2
   0 -14   4 4371.77 465.796   5
   0  14  -4 4637.19 661.288   2
   0 -14   3 638.108 190.168   5
   0 -14   3 121.372 371.843   4
   0 -14   2-14.2527 333.292   4
   0 -14   2 531.919 196.328   5
   0 -14   1 1633.19 303.025   5
   0 -14   1 1303.15 891.921   4
   0 -14   0 610.825 822.234   4
   0 -14   0 722.389 224.786   5
   0 -14  -1 1673.08 302.901   5
   0 -14  -1 703.218 684.994   4
   0 -14  -2 3005.09 1076.84   4
   0 -14  -2 5719.67 527.134   5
   0 -14  -3 2960.23 1011.97   4
   0 -14  -3 3622.43 445.616   5
   0 -14  -4 1707.51 319.809   5
   0 -14  -4 1493.97 653.177   4
   0 -14  -5 6901.39 590.440   5
   0 -14  -5 5006.90 1140.95   4
   0 -14  -6 3554.26 434.747   5
   0 -14  -6 2532.66 760.780   4
   0 -14  -7 798.016 446.672   4
   0 -14  -7 786.363 230.680   5
   0 -14  -8 721.291 430.100   4
   0 -14  -8 1563.98 296.048   5
   0 -14  -9 2901.91 401.008   5
   0 -14  -9 1770.47 570.764   4
   0 -14 -10-189.205 234.618   4
   0 -14 -10 353.961 194.598   5
   0 -14 -11 2061.38 571.407   4
   0 -14 -11 3258.65 417.995   5
   0 -14 -12 703.230 335.307   4
   0 -14 -12 1227.55 275.045   5
   0 -14 -13-148.818 190.995   4
   0 -14 -13 88.4107 133.595   5
   0 -14 -14 2014.65 324.148   5
   0 -14 -14 976.690 350.610   4
   0 -14 -15 2385.40 554.567   4
   0 -14 -15 2762.30 386.558   5
   0 -14 -16 515.204 291.559   4
   0 -14 -17 524.873 313.980   4
   0 -14 -18 712.470 320.244   4
   0  15  -7 270.007 234.685   2
   0  15  -6 1105.37 340.588   2
   0  15  -5 2988.87 541.795   2
   0 -15   4 309.593 130.849   5
   0  15  -4 232.698 172.280   2
   0 -15   3 878.931 234.839   5
   0 -15   3 527.389 582.230   4
   0 -15   2 3888.73 451.653   5
   0 -15   2 2803.90 1282.11   4
   0 -15   1 1249.80 863.044   4
   0 -15   1 1056.37 252.919   5
   0 -15   0 828.289 739.741   4
   0 -15   0 1458.22 304.434   5
   0 -15  -1 3541.62 443.267   5
   0 -15  -1 2096.57 963.559   4
   0 -15  -2 3171.60 419.149   5
   0 -15  -2 2477.77 1023.95   4
   0 -15  -3 589.789 227.921   5
   0 -15  -3 721.743 696.823   4
   0 -15  -4 2031.30 352.836   5
   0 -15  -4 1221.59 739.720   4
   0 -15  -5 2798.22 407.626   5
   0 -15  -5 2020.57 832.016   4
   0 -15  -6 279.475 407.574   4
   0 -15  -6 384.485 219.299   5
   0 -15  -7 4625.52 501.613   5
   0 -15  -7 3073.01 868.117   4
   0 -15  -8 2912.81 858.969   4
   0 -15  -8 4177.30 476.002   5
   0 -15  -9 762.253 257.947   5
   0 -15  -9 441.876 315.473   4
   0 -15 -10 2040.62 677.413   4
   0 -15 -10 2289.83 368.294   5
   0 -15 -11 1595.62 567.293   4
   0 -15 -11 2349.33 368.695   5
   0 -15 -12 106.205 177.635   4
   0 -15 -12 331.260 196.568   5
   0 -15 -13 934.008 422.180   4
   0 -15 -13 1076.81 258.172   5
   0 -15 -14 2964.39 754.799   4
   0 -15 -14 1345.69 275.984   5
   0 -15 -15 74.2038 108.325   5
   0 -15 -15 133.676 185.881   4
   0 -15 -16 554.722 283.832   4
   0 -15 -17 903.914 370.067   4
   0  16  -5 439.397 218.466   2
   0  16  -4 802.593 311.195   2
   0 -16   3 619.060 210.212   5
   0 -16   2 1390.83 928.247   4
   0 -16   2 26.1550 86.8622   5
   0 -16   1 1831.48 1061.27   4
   0 -16   1 1281.80 287.969   5
   0 -16   0 4549.29 517.186   5
   0 -16   0 2601.85 1231.50   4
   0 -16  -1 817.942 760.540   4
   0 -16  -1 372.934 185.588   5
   0 -16  -2 2294.45 369.574   5
   0 -16  -2 1927.26 950.835   4
   0 -16  -3 3908.55 489.488   5
   0 -16  -3 1784.86 886.230   4
   0 -16  -4 2591.79 396.310   5
   0 -16  -4 1524.31 810.711   4
   0 -16  -5 456.510 226.547   5
   0 -16  -5 435.742 560.120   4
   0 -16  -6 3339.34 439.277   5
   0 -16  -6 2629.66 898.005   4
   0 -16  -7 2535.68 399.329   5
   0 -16  -7 1702.23 717.501   4
   0 -16  -8 396.103 198.370   5
   0 -16  -8 122.217 382.923   4
   0 -16  -9 1262.95 574.707   4
   0 -16  -9 1272.21 293.055   5
   0 -16 -10 278.087 305.874   4
   0 -16 -10 591.858 221.778   5
   0 -16 -11 413.485 205.221   5
   0 -16 -11 438.675 334.207   4
   0 -16 -12 3439.90 854.700   4
   0 -16 -12 5173.01 558.266   5
   0 -16 -13 1506.75 530.471   4
   0 -16 -13 2134.25 350.538   5
   0 -16 -14-11.4545 141.366   4
   0 -16 -14 96.2589 90.0201   5
   0 -16 -15 1332.66 262.590   5
   0 -16 -15 1196.53 475.813   4
   0 -16 -16 550.625 284.979   4
   0 -17   3-263.782 193.469   5
   0 -17   2 1478.75 298.589   5
   0 -17   1 2531.68 1370.65   4
   0 -17   1 3475.55 491.816   5
   0 -17   0 1208.42 1017.39   4
   0 -17   0 713.172 217.012   5
   0 -17  -1 1576.73 328.237   5
   0 -17  -1 324.612 702.824   4
   0 -17  -2 2709.99 409.063   5
   0 -17  -2 1593.26 1008.89   4
   0 -17  -3 243.159 162.269   5
   0 -17  -3 924.060 838.324   4
   0 -17  -4 993.296 764.837   4
   0 -17  -4 1875.38 350.235   5
   0 -17  -5 2695.83 420.397   5
   0 -17  -5 2083.19 911.380   4
   0 -17  -6 282.762 434.024   4
   0 -17  -6 617.943 216.784   5
   0 -17  -7 945.422 299.845   5
   0 -17  -7 658.685 546.071   4
   0 -17  -8 1471.05 671.862   4
   0 -17  -8 2256.80 395.020   5
   0 -17  -9 1108.75 281.155   5
   0 -17  -9 932.799 573.773   4
   0 -17 -10 971.842 279.114   5
   0 -17 -10 440.265 361.924   4
   0 -17 -11 2585.10 411.243   5
   0 -17 -11 1647.49 606.565   4
   0 -17 -12 1947.05 363.822   5
   0 -17 -12 1233.67 543.836   4
   0 -17 -13 64.5675 111.973   5
   0 -17 -13 395.476 367.422   4
   0 -17 -14 2177.08 366.028   5
   0 -17 -14 1880.03 640.202   4
   0 -17 -15 1052.51 474.533   4
   0 -17 -15 1495.96 319.374   5
   0 -18  -1 1126.27 289.842   5
   0 -18  -2 324.301 459.201   4
   0 -18  -2 369.409 183.930   5
   0 -18  -3 1104.18 898.065   4
   0 -18  -3 1572.32 358.822   5
   0 -18  -4 1021.02 1000.79   4
   0 -18  -4 1969.58 385.790   5
   0 -18  -5 712.031 688.690   4
   0 -18  -5 395.885 199.684   5
   0 -18  -6 1734.89 907.338   4
   0 -18  -6 2413.36 417.960   5
   0 -18  -7 2814.36 438.578   5
   0 -18  -7 1579.43 810.816   4
   0 -18  -8 257.167 201.306   4
   0 -18  -8 405.248 222.588   5
   0 -18  -9 670.112 493.682   4
   0 -18  -9 679.805 238.913   5
   0 -18 -10 1600.05 700.966   4
   0 -18 -10 1917.83 363.929   5
   0 -18 -11 530.444 203.667   5
   0 -18 -11 955.870 581.908   4
   0 -18 -12 1247.50 579.649   4
   0 -18 -13 1103.33 576.525   4
   0 -19  -7 572.331 646.321   4
   0 -19  -8 981.375 713.764   4
   0 -19  -9 1765.12 850.961   4
   1 -18 -11 1050.60 598.743   4
   1 -18 -10 767.679 539.231   4
   1 -18  -9 1777.11 747.058   4
   1 -18  -8 1014.41 304.119   5
   1 -18  -8 237.201 195.742   4
   1 -18  -7 650.984 259.073   5
   1 -18  -7 43.3724 236.665   4
   1 -18  -6 1587.51 363.723   5
   1 -18  -6 682.827 525.256   4
   1 -18  -5 1744.33 374.410   5
   1 -18  -5 1670.08 996.079   4
   1 -18  -4 4289.59 1393.18   4
   1 -18  -4 807.320 289.409   5
   1 -18  -3 3012.71 468.013   5
   1 -18  -3 1901.19 1126.91   4
   1 -17 -15 260.864 190.057   5
   1 -17 -14 613.550 464.761   4
   1 -17 -14 872.576 254.969   5
   1 -17 -13 2892.76 456.611   5
   1 -17 -13 1628.61 576.320   4
   1 -17 -12 954.811 527.762   4
   1 -17 -12 1784.78 370.551   5
   1 -17 -11 2081.89 385.006   5
   1 -17 -11 1754.88 724.658   4
   1 -17 -10 2473.08 431.661   5
   1 -17 -10 1485.99 641.179   4
   1 -17  -9 1178.74 329.118   5
   1 -17  -9 193.964 182.629   4
   1 -17  -8 605.479 444.210   4
   1 -17  -8 1068.53 320.043   5
   1 -17  -7 1184.74 596.943   4
   1 -17  -7 2071.27 400.602   5
   1 -17  -6 1949.81 849.039   4
   1 -17  -6 2711.99 436.465   5
   1 -17  -5 724.866 676.503   4
   1 -17  -5 954.722 292.960   5
   1 -17  -4 2464.31 416.349   5
   1 -17  -4 1160.62 848.973   4
   1 -17  -3 1643.08 352.870   5
   1 -17  -3 323.896 680.101   4
   1 -17  -2 871.526 276.062   5
   1 -17  -2 290.798 720.640   4
   1 -17  -1 3544.26 478.860   5
   1 -17  -1 1258.07 875.131   4
   1 -17   0 3050.41 441.227   5
   1 -17   1 759.031 270.929   5
   1 -17   2 1235.16 304.882   5
   1 -17   3 841.077 258.186   5
   1 -16 -15 2151.50 397.334   5
   1 -16 -15 575.647 369.901   4
   1 -16 -14 1437.40 504.378   4
   1 -16 -14 3286.30 464.864   5
   1 -16 -13 1118.20 318.866   5
   1 -16 -13 382.132 300.325   4
   1 -16 -12 422.197 325.394   4
   1 -16 -12 1391.99 329.097   5
   1 -16 -11 2438.41 736.375   4
   1 -16 -11 3116.49 455.224   5
   1 -16 -10 874.027 300.945   5
   1 -16 -10 457.339 397.545   4
   1 -16  -9 788.051 460.816   4
   1 -16  -9 2238.50 405.015   5
   1 -16  -8 3340.39 905.588   4
   1 -16  -7 390.575 435.198   4
   1 -16  -6 969.684 567.977   4
   1 -16  -5 654.085 525.690   4
   1 -16  -4 645.288 513.232   4
   1 -16  -3 1022.08 700.380   4
   1 -16  -2 2390.09 1113.80   4
   1 -16  -2 4453.21 510.898   5
   1 -16  -1 2945.03 429.075   5
   1 -16  -1 495.179 332.390   4
   1 -16   0 131.653 638.183   4
   1 -16   0 783.458 257.274   5
   1 -16   1 1569.04 1070.04   4
   1 -16   1 4912.29 547.152   5
   1 -16   2 1894.29 1223.24   4
   1 -16   2 2891.03 420.845   5
   1 -16   3 385.992 228.587   5
  -1  16  -4 1620.26 424.991   2
  -1  16  -5 1078.44 445.951   2
   1 -15 -16 850.618 355.613   4
   1 -15 -15 978.105 402.015   4
   1 -15 -15 2304.06 369.183   5
   1 -15 -14 530.030 218.152   5
   1 -15 -14-17.4373 106.413   4
   1 -15 -13 481.740 271.339   4
   1 -15 -13 603.777 233.784   5
   1 -15 -12 867.742 408.805   4
   1 -15 -12 1482.09 321.050   5
   1 -15 -11 767.723 264.051   5
   1 -15 -11 105.791 190.116   4
   1 -15 -10 2244.05 655.883   4
   1 -15  -9 1074.14 523.551   4
   1 -15  -8 201.652 402.998   4
   1 -15  -7 4185.36 1000.52   4
   1 -15  -6 5067.16 1122.19   4
   1 -15  -5 659.087 504.051   4
   1 -15  -4 1317.31 643.597   4
   1 -15  -3 2491.16 1042.29   4
   1 -15  -2 1536.51 898.829   4
   1 -15  -1 693.813 677.149   4
   1 -15   0 1212.42 879.899   4
   1 -15   1 2115.56 357.705   5
   1 -15   2 314.620 588.054   4
   1 -15   2 1251.97 284.214   5
   1 -15   3 4079.35 478.211   5
   1 -15   3 1394.47 912.940   4
  -1  15  -4 1069.53 286.850   2
   1 -15   4 1447.26 323.405   5
  -1  15  -5 281.470 192.932   2
  -1  15  -6 2244.85 455.355   2
  -1  15  -6 1994.19 716.031   6
   1 -14 -17 1118.96 399.448   4
   1 -14 -16 1061.35 391.987   4
   1 -14 -15 383.694 249.438   4
   1 -14 -14 2851.63 403.333   5
   1 -14 -14 1820.09 472.801   4
   1 -14 -13 1082.53 385.829   4
   1 -14 -13 2191.72 375.228   5
   1 -14 -12 702.534 253.042   5
   1 -14 -12-39.6664 184.919   4
   1 -14 -11 1340.44 445.920   4
   1 -14 -10 3335.67 741.986   4
   1 -14  -9 159.027 200.239   4
   1 -14  -8 1998.90 593.445   4
   1 -14  -7 1889.12 604.421   4
   1 -14  -6-27.9112 223.644   4
   1 -14  -5 278.733 343.216   4
   1 -14  -4 6092.20 1305.74   4
   1 -14  -3 1702.27 715.819   4
   1 -14  -2 801.810 652.885   4
   1 -14  -1 580.458 541.760   4
   1 -14   0-179.443 424.235   4
   1 -14   1 701.962 756.721   4
   1 -14   2 3564.56 442.758   5
   1 -14   2 2766.49 1248.10   4
   1 -14   3 1748.19 321.031   5
   1 -14   3 1144.76 700.039   4
   1 -14   4 332.733 166.270   5
   1 -14   4 837.257 783.998   4
  -1  14  -5 2937.17 515.443   2
   1 -14   5 2622.11 374.650   5
  -1  14  -6 780.979 234.349   2
  -1  14  -6 1321.07 541.026   6
  -1  14  -7 494.246 380.259   6
  -1  14  -7 133.161 189.928   2
  -1  14  -8 2224.84 740.198   6
   1 -13 -18 730.036 325.014   4
   1 -13 -17 312.102 229.883   4
   1 -13 -16 209.759 200.899   4
   1 -13 -15 2148.03 498.097   4
   1 -13 -14 1436.69 419.359   4
   1 -13 -14 1847.53 317.203   5
   1 -13 -13 524.984 213.680   5
   1 -13 -13 736.157 327.050   4
   1 -13 -12 1457.28 426.953   4
   1 -13 -12 2700.45 386.037   5
   1 -13 -11 3185.14 646.814   4
   1 -13 -10 26.7750 120.028   4
   1 -13  -9 1288.59 439.134   4
   1 -13  -8 2188.26 576.278   4
   1 -13  -7 620.626 365.342   4
   1 -13  -6 3840.46 863.764   4
   1 -13  -5 2038.68 674.923   4
   1 -13  -4 2002.57 766.382   4
   1 -13  -3 296.429 312.809   4
   1 -13  -2 5232.38 1274.76   4
   1 -13  -1 19.0861 495.725   4
   1 -13   0 801.786 618.475   4
   1 -13   1 1094.93 678.005   4
   1 -13   2-149.278 393.494   4
   1 -13   3 1207.06 272.628   5
   1 -13   3 1388.38 851.575   4
   1 -13   4 3602.59 415.169   5
   1 -13   4 1478.82 900.283   4
  -1  13  -5 356.983 182.765   2
   1 -13   5 369.534 176.621   5
  -1  13  -6 1500.47 605.869   6
  -1  13  -6 589.906 212.190   2
  -1  13  -7 1461.77 591.665   6
  -1  13  -7 2726.65 461.442   2
  -1  13  -8 1867.61 648.261   6
  -1  13  -9 491.785 459.576   6
   1 -12 -18-32.8077 100.673   4
   1 -12 -17 124.125 272.242   6
   1 -12 -17 269.601 199.320   4
   1 -12 -16 324.227 271.041   6
   1 -12 -16 407.222 241.169   4
   1 -12 -15 117.389 173.172   6
   1 -12 -15 572.572 251.487   4
   1 -12 -14 192.201 178.891   4
   1 -12 -14 286.299 173.010   5
   1 -12 -13 2963.65 378.148   5
   1 -12 -13 1754.67 419.952   4
   1 -12 -12 590.730 256.024   4
   1 -12 -11 397.501 249.869   4
   1 -12 -10 4807.72 721.574   4
   1 -12  -9 3900.86 689.742   4
   1 -12  -8-57.2385 104.857   4
   1 -12  -7 5658.21 918.507   4
   1 -12  -6 2476.90 675.047   4
   1 -12  -5 897.135 459.775   4
   1 -12  -4 2571.78 737.221   4
   1 -12  -3 5179.24 1079.22   4
   1 -12  -2 692.032 352.787   4
   1 -12  -1 4195.92 1150.24   4
   1 -12   0 6683.59 1489.36   4
   1 -12   1 635.482 567.616   4
   1 -12   3 1596.73 894.343   4
   1 -12   4 141.452 446.204   4
   1 -12   4 787.321 221.652   5
  -1  12  -5 1619.26 360.108   2
   1 -12   5 1910.49 298.321   5
   1 -12   6 2183.60 314.294   5
  -1  12  -6 2123.05 618.283   6
  -1  12  -6 2173.00 402.022   2
  -1  12  -7 1107.22 276.034   2
  -1  12  -7 1071.05 501.514   6
  -1  12  -8 307.537 156.623   2
  -1  12  -8 27.4527 238.064   6
  -1  12  -9 3700.63 873.297   6
  -1  12 -10 1284.36 532.256   6
   1 -11 -18 573.298 284.636   4
   1 -11 -17 1530.97 527.104   6
   1 -11 -17 1009.60 332.705   4
   1 -11 -16 494.578 304.105   6
   1 -11 -16 526.724 230.427   4
   1 -11 -15 248.052 160.451   4
   1 -11 -15 437.172 310.394   6
   1 -11 -14 2027.18 298.315   5
   1 -11 -14 1024.04 417.413   6
   1 -11 -14 1103.28 325.389   4
   1 -11 -13 195.521 120.812   4
   1 -11 -13-81.0164 229.128   6
   1 -11 -12 924.389 302.909   4
   1 -11 -11 1253.91 326.722   4
   1 -11 -10 1340.19 342.805   4
   1 -11  -9 233.546 170.279   4
   1 -11  -8 3886.07 638.261   4
   1 -11  -7 4570.68 744.807   4
   1 -11  -6 382.697 254.997   4
   1 -11  -5 4641.74 838.221   4
   1 -11  -4 1673.77 505.926   4
   1 -11  -3 238.772 213.894   4
   1 -11  -2 616.246 405.953   4
   1 -11  -1 1526.33 677.857   4
   1 -11   0-65.7939 349.600   4
   1 -11   1 3725.51 1144.13   4
   1 -11   2 906.383 650.669   4
   1 -11   3 178.370 370.474   4
   1 -11   4 1565.43 820.928   4
  -1  11  -5 4250.19 551.084   2
   1 -11   5 4249.61 418.203   5
  -1  11  -6 294.470 203.906   6
  -1  11  -6 34.2472 107.924   2
   1 -11   6 343.344 149.802   5
  -1  11  -7 403.709 392.627   6
  -1  11  -7 449.266 203.179   2
  -1  11  -8 2089.17 645.168   6
  -1  11  -8 1532.55 324.267   2
  -1  11  -9 2034.42 870.432   6
  -1  11  -9 1650.06 343.010   2
  -1  11 -10 1241.79 498.561   6
  -1  11 -11 1683.52 671.578   6
   1 -10 -19 345.406 206.813   4
   1 -10 -18 565.168 239.269   4
   1 -10 -17 232.969 172.954   4
   1 -10 -17 414.334 309.049   6
   1 -10 -16 307.387 156.502   4
   1 -10 -16 279.580 284.137   6
   1 -10 -15 4193.92 743.564   6
   1 -10 -15 4036.15 590.767   4
   1 -10 -14 444.531 295.321   6
   1 -10 -14 477.656 161.490   5
   1 -10 -14 97.1992 105.339   4
   1 -10 -13 5813.23 693.947   4
   1 -10 -13 4684.09 762.690   6
   1 -10 -12 2542.09 546.871   6
   1 -10 -12 3475.62 519.380   4
   1 -10 -11 945.146 255.480   4
   1 -10 -11 536.401 256.646   6
   1 -10 -10 288.961 181.124   4
   1 -10  -9 2957.32 471.588   4
   1 -10  -8 1946.29 406.777   4
   1 -10  -7 2287.60 469.605   4
   1 -10  -6 7827.96 934.812   4
   1 -10  -5 1852.81 479.702   4
  -1  10   4 117.242 72.0049   1
   1 -10  -4 112.130 215.693   4
   1 -10  -3 6559.02 1073.28   4
  -1  10   3 6352.27 428.983   1
   1 -10  -2 6097.95 1091.09   4
   1 -10  -1-96.4763 198.521   4
   1 -10   0 3979.96 1085.89   4
   1 -10   1 3727.59 1073.72   4
   1 -10   2 109.509 313.628   4
   1 -10   3 1791.13 818.182   4
   1 -10   4 4980.23 1387.94   4
  -1  10  -5 443.503 174.047   2
  -1  10  -6 6345.62 966.215   6
   1 -10   6 5258.10 434.280   5
  -1  10  -6 5993.39 609.140   2
  -1  10  -7 2138.21 350.219   2
  -1  10  -7 1503.17 497.904   6
  -1  10  -8 1630.49 311.907   2
  -1  10  -8 2024.14 588.335   6
  -1  10  -9 1098.45 292.979   2
  -1  10  -9 842.501 402.471   6
  -1  10 -10 2879.68 722.764   6
  -1  10 -11 585.311 379.925   6
  -1  10 -12 483.630 387.152   6
   1  -9 -19 821.468 295.693   4
   1  -9 -18 254.865 186.344   4
   1  -9 -18 270.130 240.276   6
   1  -9 -17 742.985 351.075   6
   1  -9 -17 302.763 168.466   4
   1  -9 -16 152.993 152.751   6
   1  -9 -16 317.071 176.063   4
   1  -9 -15 541.763 333.354   6
   1  -9 -15 264.583 156.820   4
   1  -9 -14 1736.28 451.449   6
   1  -9 -14 1767.60 371.028   4
   1  -9 -13 4722.25 382.579   5
   1  -9 -13 2920.21 580.687   6
   1  -9 -13 2713.68 441.426   4
   1  -9 -12 735.342 274.008   6
   1  -9 -12 453.530 180.437   4
   1  -9 -11 6073.06 652.074   4
   1  -9 -11 4868.13 701.380   6
   1  -9 -10 7033.28 702.291   4
   1  -9 -10 4753.15 690.552   6
   1  -9  -9 2166.90 378.045   4
   1  -9  -9 572.936 244.144   6
   1  -9  -8 539.731 204.514   4
   1  -9  -7 2375.80 421.756   4
   1  -9  -6-15.0128 66.5635   4
   1  -9  -5 463.386 258.448   4
   1  -9  -4 2215.32 505.969   4
  -1   9   4 1785.48 181.496   1
   1  -9  -3 5413.52 865.120   4
  -1   9   3 5913.60 387.654   1
   1  -9  -2 3430.12 764.975   4
  -1   9   2 2459.24 266.214   1
   1  -9  -1 15430.4 1744.83   4
   1  -9   0 6443.67 1243.61   4
   1  -9   1 115.339 279.505   4
   1  -9   2 1459.06 771.480   4
   1  -9   3 852.352 699.629   4
   1  -9   4 479.993 446.771   4
  -1   9  -5 4999.49 543.352   2
  -1   9  -6 4244.39 474.762   2
  -1   9  -6 3735.69 704.040   6
   1  -9   7 994.782 183.322   5
  -1   9  -7 1408.95 466.474   6
  -1   9  -7 1231.97 266.460   2
  -1   9  -8 1760.93 561.753   6
  -1   9  -8 2145.17 342.690   2
  -1   9  -9 3095.73 689.620   6
  -1   9  -9 3249.22 420.180   2
  -1   9 -10 396.834 138.007   2
  -1   9 -10 1366.44 533.709   6
  -1   9 -11 3039.65 742.626   6
  -1   9 -12 2494.27 743.690   6
  -1   9 -13 166.979 345.573   6
   1  -8 -19 162.742 206.970   4
   1  -8 -18 1038.93 320.066   4
   1  -8 -18 1811.81 534.721   6
   1  -8 -17 1024.37 312.027   4
   1  -8 -17 1153.80 439.249   6
   1  -8 -16 73.0844 98.7047   4
   1  -8 -16 154.506 245.776   6
   1  -8 -15 1740.50 451.463   6
   1  -8 -15 906.711 260.399   4
   1  -8 -14 3097.09 471.221   4
   1  -8 -14 4369.23 689.405   6
   1  -8 -13 2582.54 268.254   5
   1  -8 -13 1418.73 304.589   4
   1  -8 -13 2066.21 457.766   6
   1  -8 -12 187.361 107.625   4
   1  -8 -12 62.3069 120.415   6
   1  -8 -11 2942.30 422.205   4
   1  -8 -11 3168.96 545.372   6
   1  -8 -10 970.901 290.676   6
   1  -8 -10 1076.88 254.854   4
   1  -8  -9 3318.96 540.518   6
   1  -8  -9 4452.15 507.965   4
   1  -8  -9 3982.43 225.002   1
   1  -8  -8 8438.85 711.522   4
   1  -8  -8 4490.92 633.934   6
   1  -8  -7 1140.54 272.831   4
   1  -8  -6 2440.75 405.273   4
   1  -8  -5 1122.78 279.000   4
   1  -8  -4 1372.56 360.839   4
  -1   8   3 122.090 63.5021   1
   1  -8  -3 70.5158 157.798   4
   1  -8  -2 12558.1 1327.30   4
  -1   8   2 12336.1 586.255   1
   1  -8  -1 2155.43 629.541   4
   1  -8   0 293.259 289.041   4
   1  -8   1 1189.87 553.015   4
   1  -8   2 2008.00 827.854   4
   1  -8   3 284.655 399.629   4
   1  -8   4 1515.36 678.766   4
  -1   8  -5 1087.28 227.825   2
  -1   8  -6 1117.51 230.499   2
  -1   8  -6 1212.62 420.272   6
   1  -8   7 6440.97 423.341   5
  -1   8  -7 7100.37 575.658   2
  -1   8  -7 6757.88 926.242   6
  -1   8  -8 2518.65 344.260   2
  -1   8  -8 2321.76 563.319   6
  -1   8  -9 90.7115 97.8247   2
  -1   8  -9 294.139 287.282   6
  -1   8 -10 3887.03 392.750   2
  -1   8 -10 3950.24 791.779   6
  -1   8 -11 2658.30 327.983   2
  -1   8 -11 2469.05 617.345   6
  -1   8 -12 116.294 317.650   6
  -1   8 -13 2010.33 646.631   6
  -1   8 -14 1293.95 547.215   6
   1  -7 -19 1419.08 387.664   4
   1  -7 -18 1482.28 376.271   4
   1  -7 -18 2315.33 592.852   6
   1  -7 -17 300.171 194.769   4
   1  -7 -17 214.835 247.003   6
   1  -7 -16 846.170 256.039   4
   1  -7 -16 1248.75 427.736   6
   1  -7 -15 1271.07 298.007   4
   1  -7 -15 1344.97 427.985   6
   1  -7 -14 31.6112 50.2349   4
   1  -7 -14 506.543 277.144   6
   1  -7 -13 1388.89 181.327   5
   1  -7 -13 1098.55 262.296   4
   1  -7 -13 992.343 330.264   6
   1  -7 -12 2375.95 457.754   6
   1  -7 -12 1575.89 309.461   4
   1  -7 -11 560.993 178.391   4
   1  -7 -11 591.772 244.337   6
   1  -7 -10 2283.75 433.278   6
   1  -7 -10 2042.70 331.228   4
   1  -7  -9 12170.7 1000.44   6
   1  -7  -9 13876.8 875.247   4
   1  -7  -8 1614.47 361.924   6
   1  -7  -8 2151.59 333.462   4
   1  -7  -7 3284.75 515.120   6
   1  -7  -7 4730.13 490.185   4
   1  -7  -6 4157.71 470.827   4
   1  -7  -5 1092.58 257.502   4
   1  -7  -4 1564.74 333.250   4
   1  -7  -3 7420.63 826.558   4
  -1   7   3 8398.37 401.453   1
  -1   7   2 4191.16 308.692   1
   1  -7  -2 4258.31 717.137   4
   1  -7  -1 3987.56 709.435   4
  -1   7   1 3657.36 307.681   1
   1  -7   0 2445.81 597.928   4
   1  -7   1 256.931 244.910   4
   1  -7   2 85.7500 177.109   4
   1  -7   3 696.533 490.526   4
   1  -7   4 4920.74 1122.67   4
  -1   7  -5 81.2238 85.8299   2
  -1   7  -6 2229.89 478.557   6
  -1   7  -6 2672.54 321.539   2
  -1   7  -7 97.8779 233.409   6
  -1   7  -7 23.5413 57.0711   2
  -1   7  -8 587.282 309.034   6
  -1   7  -8 629.979 185.109   2
   1  -7   8 501.636 120.373   5
  -1   7  -9 4522.38 797.436   6
  -1   7  -9 3807.20 383.853   2
  -1   7 -10 6807.43 986.663   6
  -1   7 -10 7336.21 508.778   2
  -1   7 -11-44.0947 140.737   6
  -1   7 -11 68.5749 66.8303   2
  -1   7 -12 2091.62 589.845   6
  -1   7 -13 2383.79 697.703   6
  -1   7 -14 157.820 320.769   6
   1  -6 -18 623.221 402.392   6
   1  -6 -17 1520.61 486.467   6
   1  -6 -16 918.203 350.445   6
   1  -6 -15 174.923 261.496   6
   1  -6 -14 5864.91 780.728   6
   1  -6 -13 2648.66 502.001   6
   1  -6 -12 608.569 127.128   5
   1  -6 -12 333.049 204.184   6
   1  -6 -11 1245.39 320.448   6
   1  -6 -11 971.583 223.095   4
   1  -6 -10 120.217 136.744   6
   1  -6 -10 43.6466 39.7019   4
   1  -6  -9 1972.52 367.696   6
   1  -6  -9 1729.98 290.864   4
   1  -6  -8 11760.2 921.073   6
   1  -6  -8 12566.2 764.311   4
   1  -6  -7 33562.8 1626.06   6
   1  -6  -7 38251.3 1440.20   4
   1  -6  -6 3638.24 514.567   6
   1  -6  -6 4645.21 463.016   4
   1  -6  -5 9235.92 662.332   4
   1  -6  -4 4126.48 451.878   4
   1  -6  -4 3013.59 152.403   1
   1  -6  -3 6506.85 668.229   4
  -1   6   3 7617.37 340.584   1
   1  -6  -2 11423.4 1023.59   4
  -1   6   2 8945.24 433.659   1
   1  -6  -1 29358.5 1863.68   4
  -1   6   1 26347.2 901.174   1
   1  -6   0 381.877 281.101   4
  -1   6   0 500.722 126.584   1
   1  -6   1 2143.67 559.640   4
   1  -6   2 3499.88 827.056   4
   1  -6   3 306.752 301.458   4
   1  -6   4 93.3276 240.070   4
  -1   6  -5 8716.42 568.610   2
  -1   6  -6 9638.92 588.266   2
  -1   6  -6 10119.4 1000.65   6
  -1   6  -7 2676.49 546.713   6
  -1   6  -7 3009.91 324.378   2
   1  -6   8 5627.26 334.397   5
  -1   6  -8 6815.49 876.844   6
  -1   6  -8 5772.70 456.968   2
  -1   6  -9 6611.57 463.019   2
  -1   6  -9 6267.38 863.589   6
  -1   6 -10 479.545 122.150   2
  -1   6 -10 298.604 243.723   6
  -1   6 -11 2719.97 631.359   6
  -1   6 -11 2518.31 286.934   2
  -1   6 -12 1473.73 230.529   2
  -1   6 -12 2151.53 631.403   6
  -1   6 -13 302.917 266.187   6
  -1   6 -14 1350.79 647.942   6
  -1   6 -15 2563.28 747.169   6
   1  -5 -18 1429.26 471.077   6
   1  -5 -17 241.023 216.010   6
   1  -5 -16 873.579 332.848   6
   1  -5 -15 1908.74 455.443   6
   1  -5 -14 1918.14 429.525   6
   1  -5 -13 1436.42 383.547   6
   1  -5 -12 5362.40 285.432   5
   1  -5 -12 4312.61 600.141   6
   1  -5 -11 1427.73 322.228   6
   1  -5 -10 864.897 237.798   6
   1  -5  -9 4651.22 540.614   6
   1  -5  -8 1262.97 216.932   4
   1  -5  -8 1158.24 261.052   6
   1  -5  -7 97.6301 135.780   6
   1  -5  -7-29.7195 55.8118   4
   1  -5  -6 3436.46 353.941   4
   1  -5  -6 2983.12 409.249   6
   1  -5  -5 17759.3 1086.67   6
   1  -5  -5 22331.6 984.126   4
   1  -5  -4 364.689 59.2236   1
   1  -5  -4 607.940 179.072   4
   1  -5  -3 1573.61 274.380   4
   1  -5  -3 971.102 92.9068   1
   1  -5  -2 38710.1 1743.39   4
  -1   5   2 41184.8 1082.76   1
   1  -5  -1 119.083 161.338   4
  -1   5   1 294.005 101.087   1
   1  -5   0 12871.6 1189.22   4
  -1   5   0 13234.0 599.144   1
   1  -5   1 1051.62 362.407   4
  -1   5  -1 1114.30 185.603   1
   1  -5   2 787.640 403.331   4
   1  -5   3 4493.51 894.680   4
   1  -5   4 11672.8 1433.20   4
  -1   5  -5 12430.0 628.836   2
  -1   5  -5 12218.0 1011.37   6
  -1   5  -6 65.7687 96.0651   6
  -1   5  -6 45.2042 46.8524   2
  -1   5  -7 7073.86 822.725   6
  -1   5  -7 6351.96 440.139   2
   1  -5   8 471.225 102.164   5
  -1   5  -8 247.402 192.972   6
  -1   5  -8 161.331 76.8661   2
  -1   5  -9 3285.46 289.787   2
  -1   5  -9 2990.24 577.317   6
  -1   5 -10 5385.96 803.751   6
  -1   5 -10 4873.86 367.331   2
  -1   5 -11 3549.88 693.809   6
  -1   5 -11 2713.88 290.230   2
  -1   5 -12 490.960 331.715   6
  -1   5 -12-11.9141 39.3213   2
  -1   5 -13 1326.25 512.977   6
  -1   5 -14 2733.66 791.796   6
  -1   5 -15 732.791 471.421   6
   1  -4 -18 111.060 190.766   6
   1  -4 -17 929.705 373.918   6
   1  -4 -16 1272.11 397.389   6
   1  -4 -15 1162.18 391.379   6
   1  -4 -14-13.8638 128.395   6
   1  -4 -13 3402.71 567.721   6
   1  -4 -12 999.320 93.2444   5
   1  -4 -12 1097.93 297.436   6
   1  -4 -11 664.661 93.6258   5
   1  -4 -11 480.379 193.682   6
   1  -4 -10 7566.81 713.360   6
   1  -4  -9 3075.92 432.748   6
   1  -4  -8 4567.36 504.333   6
   1  -4  -7 3539.51 419.363   6
   1  -4  -6 83.2803 53.2660   4
   1  -4  -6 96.0322 127.679   6
   1  -4  -5 1022.56 175.695   4
   1  -4  -5 880.184 202.020   6
   1  -4  -4 910.351 168.046   4
   1  -4  -4 749.519 212.445   6
  -1   4   3 38294.0 1239.58   4
  -1   4   3 33687.8 1420.57   6
   1  -4  -3 32702.0 1151.97   4
   1  -4  -3 27035.9 725.696   1
  -1   4   2 14685.0 780.922   4
   1  -4  -2 12398.5 767.861   4
   1  -4  -2 13081.4 430.330   1
  -1   4   2 13413.5 466.075   1
   1  -4  -1 21479.7 681.298   1
  -1   4   1 23455.1 1129.95   4
  -1   4   1 21863.9 706.874   1
   1  -4  -1 24258.2 1274.46   4
  -1   4   0 15087.0 612.646   1
  -1   4   0 16030.4 1051.93   4
   1  -4   0 18524.5 1261.17   4
  -1   4  -1 121.816 156.487   4
  -1   4  -1 174.695 69.9266   1
   1  -4   1 276.857 246.875   4
   1  -4   2 5097.07 823.351   4
   1  -4   3 4986.71 832.575   4
   1  -4   4 105.301 209.337   4
  -1   4  -4-50.2844 76.2098   2
  -1   4  -5 5064.22 599.074   6
  -1   4  -5 5138.18 342.644   2
  -1   4  -6 3922.93 307.047   2
  -1   4  -6 4057.94 556.471   6
  -1   4  -7 437.595 99.3316   2
  -1   4  -7 492.073 229.843   6
  -1   4  -8 989.732 300.176   6
   1  -4   8 901.157 109.872   5
  -1   4  -8 923.902 138.472   2
  -1   4  -9 3736.67 288.543   2
  -1   4  -9 3523.55 608.017   6
   1  -4   9 2700.71 164.949   5
  -1   4 -10 1143.21 169.157   2
  -1   4 -10 1936.07 490.864   6
  -1   4 -11 1965.74 499.335   6
  -1   4 -11 1679.43 213.624   2
  -1   4 -12 3362.94 685.955   6
  -1   4 -12 2249.08 259.915   2
  -1   4 -13 943.460 399.159   6
  -1   4 -13 855.989 180.272   2
  -1   4 -14 322.544 227.078   6
  -1   4 -15 2010.88 623.261   6
  -1   4 -16 2085.84 615.228   6
   1  -3 -18 944.091 356.055   6
   1  -3 -17 2289.04 570.413   6
   1  -3 -16 114.556 186.117   6
   1  -3 -15 925.540 335.159   6
   1  -3 -14 2318.66 510.391   6
   1  -3 -13 1682.35 392.215   6
   1  -3 -12 227.241 160.273   6
   1  -3 -11 5384.17 634.328   6
   1  -3 -11 3925.18 168.697   5
   1  -3 -10 3679.16 499.639   6
   1  -3  -9 2411.64 377.100   6
   1  -3  -8 17526.6 999.119   6
  -1   3   7 4081.43 301.177   3
   1  -3  -7 3195.17 392.886   6
   1  -3  -6 5259.89 474.633   6
  -1   3   6 6886.85 393.240   3
   1  -3  -5 9805.36 630.305   6
  -1   3   4 22213.3 731.398   2
   1  -3  -4 20422.8 949.192   6
  -1   3   4 23588.7 1013.53   6
   1  -3  -4 22187.8 810.528   4
  -1   3   3 49215.1 1236.31   4
  -1   3   3 43549.8 1433.74   6
   1  -3  -3 38478.5 1155.57   4
  -1   3   2 246.100 89.4618   4
  -1   3   2 95.3807 96.3965   6
   1  -3  -2 245.329 93.4928   4
   1  -3  -2 228.287 51.0964   1
  -1   3   1 25209.2 966.231   4
   1  -3  -1 20004.7 596.529   1
  -1   3   1 20121.8 627.716   1
   1  -3  -1 19460.7 950.999   4
   1  -3   0 19481.9 1121.94   4
   1  -3   0 17820.4 624.344   1
  -1   3   0 19931.3 1035.13   4
  -1   3   0 18400.0 634.121   1
   1  -3   1 964.339 272.310   4
  -1   3  -1 877.078 148.227   1
  -1   3  -1 989.667 255.369   4
  -1   3  -2 9155.35 502.459   1
  -1   3  -2 7048.55 731.152   4
   1  -3   2 6148.81 825.013   4
   1  -3   3 3126.32 586.609   4
  -1   3  -4 3174.09 233.333   2
  -1   3  -4 3125.14 413.530   6
  -1   3  -5 11713.7 493.625   2
  -1   3  -5 11956.4 869.242   6
  -1   3  -6 210.173 105.908   6
  -1   3  -6 218.075 69.0625   2
  -1   3  -7 4314.82 271.643   2
  -1   3  -7 3932.56 539.843   6
  -1   3  -8 3923.78 573.581   6
   1  -3   8 2919.93 156.957   5
  -1   3  -8 3658.14 254.489   2
  -1   3  -9 1037.71 354.058   6
   1  -3   9 214.717 33.2862   5
  -1   3  -9 571.773 112.614   2
  -1   3 -10 734.633 128.717   2
  -1   3 -10 985.946 334.341   6
  -1   3 -11 8264.41 975.068   6
  -1   3 -11 7026.21 435.408   2
  -1   3 -12 629.011 325.931   6
  -1   3 -12 725.661 151.870   2
  -1   3 -13 772.438 163.916   2
  -1   3 -13 1134.21 389.411   6
  -1   3 -14 2424.85 614.169   6
  -1   3 -15 682.723 313.133   6
  -1   3 -16 513.756 306.305   6
   1  -2 -18 1826.11 555.746   6
   1  -2 -17 253.465 194.301   6
   1  -2 -16 2831.60 622.869   6
   1  -2 -15 838.207 332.782   6
   1  -2 -14 204.708 164.610   6
   1  -2 -14 22.5481 49.9504   2
   1  -2 -13 1241.95 217.967   2
   1  -2 -13 1978.35 433.035   6
   1  -2 -12 5467.80 669.184   6
   1  -2 -12 4499.56 407.721   2
   1  -2 -11 1484.95 229.639   2
   1  -2 -11 1855.61 363.435   6
   1  -2 -10 1135.88 188.817   2
   1  -2 -10 1124.73 263.172   6
   1  -2  -9 11849.9 840.738   6
   1  -2  -9 10935.0 571.506   2
   1  -2  -8 477.825 165.002   6
   1  -2  -8 307.733 89.9167   2
   1  -2  -7 589.839 165.530   6
  -1   2   7 527.833 83.8760   3
   1  -2  -7 586.006 113.850   2
   1  -2  -6 8136.72 577.610   6
   1  -2  -6 8754.13 424.396   2
  -1   2   6 9434.08 406.533   3
   1  -2  -5 1898.55 258.475   6
  -1   2   5 2535.85 202.861   3
   1  -2  -5 2114.62 185.014   2
   1  -2  -4 14414.5 698.125   6
  -1   2   4 15900.7 733.672   6
  -1   2   4 14851.8 504.394   2
  -1   2   3 3810.78 218.757   2
  -1   2   3 3989.73 335.927   6
   1  -2  -3 3534.05 317.993   6
   1  -2  -2 802.051 166.599   6
  -1   2   2 1535.14 156.876   4
  -1   2   2 1264.87 204.217   6
   1  -2  -2 1240.01 141.210   4
  -1   2   1 424.596 95.7340   4
  -1   2   1 285.135 56.3872   1
   1  -2   0 6761.23 509.866   4
  -1   2   0 5910.37 294.405   1
  -1   2   0 6468.21 476.471   4
  -1   2  -1 202.135 135.056   4
   1  -2   1 106.964 121.278   4
   1  -2   1 208.598 82.2221   1
  -1   2  -1 194.048 85.0787   1
  -1   2  -2 141.227 141.268   4
   1  -2   2 50.3026 133.076   4
  -1   2  -2 70.5692 79.1534   1
   1  -2   3 4563.71 624.664   4
  -1   2  -3 7656.48 468.785   1
  -1   2  -3 3792.12 559.340   4
  -1   2  -3 8477.74 334.777   2
  -1   2  -4 6892.50 561.491   6
  -1   2  -4 6750.87 298.957   2
  -1   2  -5 23.5323 119.344   6
  -1   2  -5 8.45469 39.1410   2
  -1   2  -6 15105.9 966.338   6
  -1   2  -6 14780.2 490.389   2
  -1   2  -7 17069.2 571.401   2
  -1   2  -7 17290.7 1106.84   6
  -1   2  -8 1183.83 315.164   6
   1  -2   8 421.723 40.3946   5
  -1   2  -8 770.092 110.965   2
  -1   2  -9 2420.88 453.204   6
  -1   2  -9 1986.86 191.342   2
  -1   2 -10 794.468 138.173   2
  -1   2 -10 1019.89 328.560   6
  -1   2 -11 488.067 114.736   2
  -1   2 -11 413.014 249.896   6
  -1   2 -12 3778.11 658.281   6
  -1   2 -12 3411.50 316.626   2
  -1   2 -13 6888.44 934.932   6
  -1   2 -13 5439.50 436.729   2
  -1   2 -14 2600.09 602.590   6
  -1   2 -14 2035.23 278.785   2
  -1   2 -15 1635.73 505.664   6
  -1   2 -16 1695.46 540.468   6
  -1   2 -17 910.999 450.438   6
   1  -1 -18 881.530 409.732   6
   1  -1 -17 619.658 311.742   6
   1  -1 -16 1175.34 261.933   2
   1  -1 -16 1603.93 487.471   6
   1  -1 -15-52.9820 69.3050   2
   1  -1 -15 518.820 275.999   6
   1  -1 -14 1657.18 279.104   2
   1  -1 -14 2248.23 500.024   6
   1  -1 -13 6048.98 762.284   6
   1  -1 -13 5476.58 475.095   2
   1  -1 -12 821.289 281.751   6
   1  -1 -12 971.630 179.589   2
   1  -1 -11 821.166 160.899   2
   1  -1 -11 1328.96 331.818   6
   1  -1 -10 4901.76 568.819   6
   1  -1 -10 4759.27 364.405   2
   1  -1  -9 1567.22 191.012   2
   1  -1  -9 1827.78 336.506   6
   1  -1  -8 1605.35 293.741   6
   1  -1  -8 1676.98 188.499   2
   1  -1  -7 3978.03 269.264   2
   1  -1  -7 4004.42 429.767   6
   1  -1  -6 217.031 68.6828   2
   1  -1  -6 284.263 119.619   6
  -1   1   5 379.949 60.0408   3
  -1   1   5 485.810 140.692   6
  -1   1   5 346.408 61.5398   2
   1  -1  -5 401.921 115.755   6
   1  -1  -5 374.672 77.0070   2
  -1   1   4 30597.1 1051.01   6
  -1   1   4 32050.1 790.821   3
   1  -1  -4 27329.5 1002.13   6
  -1   1   4 27167.8 749.992   2
   1  -1  -4 28180.6 784.936   2
   1  -1  -3 3708.32 191.534   2
   1  -1  -3 3598.86 277.168   6
  -1   1   3 3824.60 184.384   2
  -1   1   3 3830.40 285.582   6
  -1   1   2 126.379 72.4637   6
  -1   1   2 65.7413 21.2600   2
  -1   1  -1 49.9009 54.1921   1
   1  -1   2 204.078 130.669   4
  -1   1  -2 85.6505 81.8587   4
  -1   1  -2 273.098 39.0601   2
  -1   1  -2 323.345 97.9110   1
  -1   1  -3 3223.76 281.788   1
  -1   1  -3 2060.05 356.148   4
  -1   1  -3 3067.77 149.275   2
  -1   1  -3 3237.94 333.077   6
  -1   1  -4 938.762 192.172   6
  -1   1  -4 328.183 159.353   4
  -1   1  -4 982.651 78.9773   2
   1  -1   4 796.752 85.3900   2
  -1   1  -5 1298.68 104.407   2
  -1   1  -5 1279.32 253.630   6
   1  -1   5 978.034 105.108   2
   1  -1   6 15260.7 530.421   2
  -1   1  -6 19064.5 1034.25   6
  -1   1  -6 17357.6 514.713   2
  -1   1  -7 1307.62 126.476   2
  -1   1  -7 1686.29 334.770   6
  -1   1  -8 4035.38 251.065   2
  -1   1  -8 5089.44 597.765   6
  -1   1  -9 7313.29 380.302   2
  -1   1  -9 8663.85 824.781   6
  -1   1 -10 107.065 58.7985   2
  -1   1 -10 78.3732 105.580   6
  -1   1 -11 3653.73 602.338   6
  -1   1 -11 3044.22 277.259   2
  -1   1 -12 2979.55 297.855   2
  -1   1 -12 3306.88 596.868   6
  -1   1 -13 256.002 93.2744   2
  -1   1 -13 726.581 341.338   6
  -1   1 -14 128.686 77.7219   2
  -1   1 -14 562.515 293.952   6
  -1   1 -15 5176.07 854.005   6
  -1   1 -16 644.307 342.160   6
  -1   1 -17 550.348 353.918   6
   1   0 -18 2275.18 604.942   6
   1   0 -17 641.811 201.836   2
   1   0 -17 920.823 380.488   6
   1   0 -16 15.3566 173.419   6
   1   0 -16-71.5548 97.1903   2
   1   0 -15 1468.66 418.048   6
   1   0 -15 474.129 163.464   2
   1   0 -14 1024.53 331.340   6
   1   0 -14 742.690 181.788   2
   1   0 -13 175.318 74.2278   2
   1   0 -13 68.6830 98.5259   6
   1   0 -12 8994.04 568.010   2
   1   0 -12 10027.9 940.582   6
   1   0 -11 3007.11 479.458   6
   1   0 -11 2729.41 286.271   2
   1   0 -10 316.429 99.1609   2
   1   0 -10 604.139 235.893   6
   1   0  -9 3743.09 477.782   6
   1   0  -9 3079.33 268.245   2
   1   0  -8 11678.0 516.881   2
   1   0  -8 13520.9 869.466   6
   1   0  -7 346.975 80.4710   2
   1   0  -7 312.089 117.285   6
   1   0  -6 6338.48 314.040   2
   1   0  -6 6494.53 508.303   6
   1   0  -5 27039.4 742.246   2
   1   0  -5 27798.5 1057.05   6
  -1   0   5 26657.4 1074.22   6
   1   0  -4 9074.71 330.578   2
  -1   0   4 8418.87 504.114   6
  -1   0   4 8782.80 318.219   2
   1   0  -4 8841.75 494.594   6
   1   0  -3 7474.73 267.460   2
   1   0  -3 7286.25 391.686   6
  -1   0   3 7426.90 264.697   2
  -1   0   3 7642.30 402.729   6
  -1   0   2 44256.2 1143.02   6
  -1   0   2 46858.3 994.926   2
   1   0   2 277.148 109.835   6
  -1   0  -2 372.342 107.707   1
  -1   0  -3 2784.37 243.992   1
   1   0   3 2161.56 245.970   6
  -1   0  -3 2871.57 111.876   2
   1   0   3 2445.81 103.626   2
  -1   0  -3 2556.28 269.052   6
   1   0   4 913.225 179.974   6
  -1   0  -4 955.367 74.0792   2
   1   0   4 896.663 68.7224   2
  -1   0  -4 1052.46 161.104   1
  -1   0  -4 1045.35 196.929   6
   1   0   5 3697.80 121.683   5
  -1   0  -5 3780.17 180.833   2
  -1   0  -5 4371.58 424.123   6
   1   0   5 3197.40 162.425   2
  -1   0  -6 651.908 80.5226   2
   1   0   6 480.041 67.5453   2
  -1   0  -6 790.262 206.765   6
  -1   0  -7 6520.51 306.963   2
  -1   0  -7 7604.04 658.433   6
  -1   0  -8 5711.86 315.450   2
  -1   0  -8 6139.66 639.315   6
  -1   0  -9-14.3408 108.294   6
  -1   0  -9 18.3704 24.6307   2
  -1   0 -10 5791.54 368.182   2
  -1   0 -10 6179.31 704.840   6
  -1   0 -11 7802.08 438.355   3
  -1   0 -11 8031.82 834.790   6
  -1   0 -11 7153.65 443.801   2
  -1   0 -12-41.3832 73.0208   2
  -1   0 -12-68.5859 96.9928   3
  -1   0 -12 155.406 180.933   6
  -1   0 -13 936.894 178.569   2
  -1   0 -13 1353.43 377.496   6
  -1   0 -14 511.498 143.370   2
  -1   0 -14 802.725 310.293   6
  -1   0 -15 122.163 69.8789   2
  -1   0 -15 155.083 232.302   6
  -1   0 -16 954.716 401.053   6
  -1   0 -17 1978.48 592.957   6
   1   1 -17 714.661 402.185   6
   1   1 -16 2660.66 599.631   6
   1   1 -16 1688.11 316.192   2
   1   1 -15 681.563 181.017   2
   1   1 -15 1016.11 357.942   6
   1   1 -14 128.610 193.631   6
   1   1 -14 78.9970 86.0600   2
   1   1 -13 1418.23 234.580   2
   1   1 -13 1712.60 436.289   6
   1   1 -12 7110.66 803.085   6
   1   1 -12 5503.55 436.915   2
   1   1 -11-67.2028 61.5128   2
   1   1 -11 67.1478 132.522   6
   1   1 -10 1888.27 221.758   2
   1   1 -10 2138.41 404.194   6
   1   1  -9 4542.58 552.118   6
   1   1  -9 4560.16 322.420   2
   1   1  -8 2144.88 353.671   6
   1   1  -8 2007.49 197.363   2
   1   1  -7 5976.00 327.046   2
   1   1  -7 6916.07 592.814   6
   1   1  -6 10105.4 312.703   3
   1   1  -6 13409.3 780.938   6
   1   1  -6 11761.4 446.687   2
   1   1  -5 27.7551 18.1551   5
   1   1  -5 41.7197 23.4661   2
   1   1  -5 122.057 92.5706   6
   1   1  -4 4386.67 214.507   2
  -1  -1   4 3725.97 328.427   6
   1   1  -4 3022.91 121.702   5
  -1  -1   4 3606.31 226.390   2
   1   1  -4 4268.24 357.799   6
   1   1  -3 11056.6 291.212   5
  -1  -1   3 10584.1 394.602   2
   1   1  -3 12806.6 383.437   2
  -1  -1   3 11087.7 515.459   6
   1   1  -3 12140.8 546.852   6
   1   1  -2 5346.76 288.705   6
  -1  -1   2 4622.39 266.448   6
   1   1  -2 5154.98 168.866   5
  -1  -1   2 4985.63 230.539   2
  -1  -1   2 6990.24 193.451   5
   1   1  -2 4703.81 214.811   2
   1   1   2 586.347 99.7486   6
   1   1   3 8595.49 273.111   2
  -1  -1  -3 9155.52 410.728   1
  -1  -1  -3 9279.22 476.734   6
  -1  -1  -3 12776.1 298.039   5
   1   1   3 8944.46 475.390   6
   1   1   3 9589.40 421.049   1
   1   1   3 9150.95 258.020   5
   1   1   4 3055.74 118.742   5
   1   1   4 3137.72 141.308   2
  -1  -1  -4 3497.24 318.313   6
   1   1   4 3419.17 314.007   6
  -1  -1  -4 3714.23 275.426   1
   1   1   5 1855.24 89.6122   5
  -1  -1  -5 1901.58 226.353   1
   1   1   5 1849.76 115.382   2
  -1  -1  -5 1984.16 283.417   6
  -1  -1  -5 1959.39 144.790   2
  -1  -1  -6 10285.9 677.372   6
   1   1   6 8305.45 304.236   2
  -1  -1  -6 9188.28 367.414   2
  -1  -1  -7 2859.92 400.676   6
   1   1   7 2695.07 168.655   2
  -1  -1  -7 2643.08 205.758   2
  -1  -1  -8 1911.97 328.380   6
  -1  -1  -8 1359.21 156.889   2
  -1  -1  -9 2934.92 436.715   6
  -1  -1  -9 2283.85 215.663   2
  -1  -1  -9 2491.57 226.124   3
  -1  -1 -10 6386.58 684.833   6
  -1  -1 -10 5737.54 377.153   2
  -1  -1 -10 6321.93 389.052   3
  -1  -1 -11 795.407 144.239   3
  -1  -1 -11 812.398 148.803   2
  -1  -1 -11 1198.23 310.890   6
  -1  -1 -12 3960.07 338.094   3
  -1  -1 -12 3428.75 332.018   2
  -1  -1 -12 4189.93 618.456   6
  -1  -1 -13 4267.40 649.436   6
  -1  -1 -13 4482.33 380.237   3
  -1  -1 -13 3252.31 346.262   2
  -1  -1 -14 363.488 239.755   6
  -1  -1 -15 1676.35 460.616   6
  -1  -1 -16 2021.96 529.581   6
  -1  -1 -17 615.057 355.659   6
  -1  -1 -18 1111.94 466.339   6
   1   2 -17 2237.69 609.378   6
   1   2 -16 1946.69 570.752   6
   1   2 -16 1520.00 306.806   2
   1   2 -15-45.5904 187.607   6
   1   2 -15 121.919 86.2736   2
   1   2 -14 835.765 331.995   6
   1   2 -14 655.447 178.950   2
   1   2 -13 1305.24 380.359   6
   1   2 -13 1440.74 240.552   2
   1   2 -12 409.867 121.872   2
   1   2 -12 334.458 222.771   6
   1   2 -11 5828.96 418.623   2
   1   2 -11 6595.99 764.722   6
   1   2 -10 1787.09 394.448   6
   1   2 -10 1442.34 190.829   2
   1   2  -9 55.8332 30.7390   2
   1   2  -9 33.3811 120.404   6
   1   2  -8 3882.19 176.879   3
   1   2  -8 5292.42 330.832   2
   1   2  -8 5896.32 620.293   6
   1   2  -7 400.419 176.734   6
   1   2  -7 324.875 77.1730   2
   1   2  -7 131.441 27.8117   3
   1   2  -6 29.2969 32.9269   2
   1   2  -6 111.315 116.998   6
   1   2  -5 13408.0 493.990   2
   1   2  -5 13246.7 765.753   6
  -1  -2   5 14612.0 380.040   5
  -1  -2   4 17945.7 638.597   2
   1   2  -4 18328.9 619.266   2
  -1  -2   4 17769.2 819.822   6
  -1  -2   4 20753.5 488.526   5
   1   2  -4 21745.7 897.256   6
   1   2  -3 4228.75 330.886   6
  -1  -2   3 4451.70 173.269   5
  -1  -2   3 3906.56 316.869   6
  -1  -2   3 3819.96 244.425   2
   1   2  -3 3628.42 157.211   5
   1   2  -3 4154.27 248.423   2
  -1  -2   2 9640.24 414.886   2
   1   2  -2 11866.5 496.933   6
  -1  -2   2 12302.2 335.442   5
   1   2  -2 10191.7 310.484   5
   1   2  -2 12270.2 436.796   2
   1   2  -1 171.432 139.645   4
  -1  -2   1 392.370 46.1638   5
   1   2  -1 396.175 50.2573   5
   1   2  -1 363.314 55.2447   3
   1   2  -1 324.466 67.4706   2
   1   2   0 1078.03 77.5509   5
   1   2   0 1127.04 88.1577   3
   1   2   0 585.443 165.987   4
   1   2   1 229.390 43.7615   3
   1   2   2 16037.9 477.553   1
  -1  -2  -2 15365.0 455.706   1
  -1  -2  -2 16686.0 490.913   4
   1   2   2 15987.0 551.321   6
   1   2   2 14234.6 407.064   5
   1   2   2 16194.2 468.283   4
  -1  -2  -3 9372.82 353.703   3
  -1  -2  -3 8855.73 363.522   1
   1   2   3 9189.70 279.486   5
  -1  -2  -3 9245.24 443.816   6
   1   2   3 9362.13 464.257   6
   1   2   3 9135.92 368.008   1
  -1  -2  -3 8964.69 279.901   5
   1   2   4 55620.9 1618.19   6
  -1  -2  -4 56387.4 1322.83   3
   1   2   4 54652.5 1167.13   5
  -1  -2  -4 54145.4 1389.53   1
  -1  -2  -4 57297.1 1572.51   6
  -1  -2  -4 53946.3 1168.06   5
   1   2   5 11608.6 678.031   6
  -1  -2  -5 11410.0 537.822   1
  -1  -2  -5 11584.0 640.133   6
  -1  -2  -5 10966.2 319.085   5
   1   2   5 10663.0 381.650   2
  -1  -2  -5 11689.9 450.931   3
  -1  -2  -6-2.88489 87.5623   6
  -1  -2  -6 57.4170 68.3375   1
  -1  -2  -6-46.6787 64.2279   3
  -1  -2  -6 34.4228 19.0004   5
   1   2   6 31.3001 32.2075   2
  -1  -2  -7 996.041 126.411   3
  -1  -2  -7 1047.81 220.434   6
  -1  -2  -7 1085.11 77.6609   5
  -1  -2  -8 11038.1 512.140   3
  -1  -2  -8 11212.2 799.805   6
  -1  -2  -9 1680.47 194.778   3
  -1  -2  -9 1744.30 337.391   6
  -1  -2 -10 203.148 121.507   6
  -1  -2 -10 345.035 95.5356   3
  -1  -2 -11 4479.71 589.028   6
  -1  -2 -11 4847.93 371.525   3
  -1  -2 -12 3589.78 344.655   3
  -1  -2 -12 3249.28 521.576   6
  -1  -2 -13 1197.22 215.000   3
  -1  -2 -13 776.243 286.256   6
  -1  -2 -14 4401.85 673.417   6
  -1  -2 -15 3487.71 630.030   6
  -1  -2 -16 432.564 273.458   6
  -1  -2 -17 1953.35 568.980   6
  -1  -2 -18 1680.52 538.344   6
   1   3 -17 890.433 466.845   6
   1   3 -16 323.616 218.290   6
   1   3 -15 2650.13 594.930   6
   1   3 -15 2719.31 375.593   2
   1   3 -14 1035.58 219.765   2
   1   3 -14 1298.24 430.388   6
   1   3 -13-116.354 135.424   6
   1   3 -13 57.5333 81.3635   2
   1   3 -12 3850.73 363.965   2
   1   3 -12 4624.97 685.978   6
   1   3 -11 1411.86 377.935   6
   1   3 -11 1398.35 208.164   2
   1   3 -10 1372.26 193.291   2
   1   3 -10 1484.21 381.824   6
   1   3  -9 1494.52 104.428   3
   1   3  -9 3453.11 543.576   6
   1   3  -9 3126.51 272.475   2
   1   3  -8 6835.76 398.760   2
   1   3  -8 6939.78 704.581   6
  -1  -3   7 1466.61 104.461   5
   1   3  -7 1312.29 160.830   2
   1   3  -7 1400.75 297.006   6
   1   3  -6 1002.45 139.946   2
  -1  -3   6 859.721 79.6969   5
   1   3  -6 1146.25 254.928   6
   1   3  -5 3040.99 271.515   2
  -1  -3   5 2710.84 152.516   5
   1   3  -5 2671.88 354.763   6
   1   3  -4 870.387 197.892   6
  -1  -3   4 821.230 81.9551   5
   1   3  -4 1024.92 143.378   2
  -1  -3   3 10528.3 352.947   5
   1   3  -3 11035.3 473.945   2
   1   3  -3 10185.3 589.181   6
   1   3  -2 2825.18 469.047   4
   1   3  -2 3776.04 263.754   2
  -1  -3   2 3766.27 186.786   5
   1   3  -1 4135.85 557.753   4
  -1  -3   1 4929.99 619.230   4
  -1  -3   0 18359.8 475.054   5
   1   3   0 15555.4 439.716   5
  -1  -3   0 9027.31 789.594   4
   1   3   0 11201.3 814.401   4
   1   3   0 16381.0 516.218   3
   1   3   1 5064.78 262.436   3
   1   3   1 4587.65 207.179   5
   1   3   1 5288.39 444.609   4
  -1  -3  -1 4438.60 438.774   4
  -1  -3  -1 5244.28 222.786   5
   1   3   1 3540.37 300.828   6
   1   3   2 9909.14 335.548   5
  -1  -3  -2 11019.0 357.170   5
  -1  -3  -2 10121.7 470.426   6
   1   3   2 11076.2 491.724   6
  -1  -3  -2 10442.3 549.863   4
   1   3   2 12661.0 523.496   4
   1   3   2 10471.1 417.810   3
  -1  -3  -2 10673.1 413.664   3
   1   3   3 25845.1 871.696   6
  -1  -3  -3 23969.5 637.705   1
   1   3   3 25202.0 655.794   1
  -1  -3  -3 22616.5 820.874   6
   1   3   3 30908.9 793.158   4
  -1  -3  -3 24405.2 748.051   3
  -1  -3  -3 25834.8 648.485   5
   1   3   3 24234.3 737.973   3
  -1  -3  -3 26067.6 790.560   4
  -1  -3  -4 8920.25 411.273   3
  -1  -3  -4 9790.56 415.665   4
  -1  -3  -4 8227.24 487.663   6
  -1  -3  -4 9293.60 322.260   5
  -1  -3  -4 8839.25 371.330   1
   1   3   4 9426.67 535.699   6
  -1  -3  -5 88.6754 60.0911   3
  -1  -3  -5 111.109 61.5423   1
  -1  -3  -5 24.5149 62.1958   6
  -1  -3  -5 29.2616 21.4511   5
  -1  -3  -6 18181.2 722.027   1
   1   3   6 19041.4 627.884   2
  -1  -3  -6 18078.6 506.638   5
  -1  -3  -6 19715.8 696.307   3
  -1  -3  -6 17597.4 870.020   6
  -1  -3  -7 25104.6 647.942   5
  -1  -3  -7 27304.9 886.529   3
  -1  -3  -7 25545.4 965.126   1
  -1  -3  -7 25689.5 1150.44   6
  -1  -3  -8 3460.52 429.251   6
  -1  -3  -8 3293.49 163.675   5
  -1  -3  -8 3743.03 297.707   3
  -1  -3  -9 1011.23 80.8423   5
  -1  -3  -9 1284.42 275.400   6
  -1  -3  -9 1172.14 180.605   3
  -1  -3 -10 5669.81 616.477   6
  -1  -3 -10 6408.48 439.028   3
  -1  -3 -11 2408.44 291.177   3
  -1  -3 -11 1921.30 380.973   6
  -1  -3 -12 274.622 143.346   3
  -1  -3 -12 181.515 145.764   6
  -1  -3 -13 1858.91 401.038   6
  -1  -3 -13 2259.96 318.898   3
  -1  -3 -14 664.798 276.745   6
  -1  -3 -15 441.444 241.042   6
  -1  -3 -16 1340.76 428.226   6
  -1  -3 -17 1045.28 391.676   6
  -1  -3 -18 110.452 263.703   6
   1   4 -16 2245.30 630.526   6
   1   4 -15 1287.28 261.982   2
   1   4 -15 1422.70 498.026   6
   1   4 -14 318.159 176.212   6
   1   4 -14 108.989 92.0594   2
   1   4 -13 1044.12 217.202   2
   1   4 -13 1340.49 453.526   6
   1   4 -12 1037.71 200.373   2
   1   4 -12 1328.72 392.125   6
   1   4 -11 2069.94 262.078   2
   1   4 -11 2274.19 482.236   6
   1   4 -10 6607.90 801.914   6
   1   4 -10 5710.10 423.131   2
   1   4  -9 1532.24 359.416   6
   1   4  -9 1508.12 197.611   2
   1   4  -8 848.129 251.416   6
   1   4  -8 809.439 134.667   2
  -1  -4   8 838.402 86.6846   5
   1   4  -7 8645.38 770.301   6
   1   4  -7 8897.09 480.094   2
  -1  -4   7 7647.20 300.731   5
  -1  -4   6 7747.86 315.311   5
   1   4  -6 8145.49 703.294   6
   1   4  -6 7347.76 448.100   2
   1   4  -5-4.93094 32.3676   2
   1   4  -5 25.4542 77.0804   6
  -1  -4   5-9.33709 40.2260   5
  -1  -4   4 8491.04 341.037   5
   1   4  -4 8868.42 642.579   6
   1   4  -4 9223.16 482.320   2
   1   4  -3 1468.88 187.848   2
   1   4  -3 1439.66 234.274   6
  -1  -4   3 1411.46 130.283   5
  -1  -4   2 593.792 89.9203   5
  -1  -4   1 26708.2 699.012   5
  -1  -4   1 20597.1 1458.51   4
  -1  -4   0 1232.36 343.049   4
   1   4   0 1551.30 350.956   4
  -1  -4   0 2051.66 158.561   5
   1   4   1 3036.38 400.498   4
  -1  -4  -1 2740.36 428.330   4
   1   4   1 3024.58 243.056   3
  -1  -4  -1 3222.22 199.393   5
  -1  -4  -2 33349.7 1372.62   4
   1   4   2 33867.5 1238.36   4
   1   4   2 34281.5 1143.96   6
  -1  -4  -2 30972.0 841.519   5
   1   4   2 30709.0 958.033   3
  -1  -4  -3 26278.9 952.508   4
   1   4   3 20972.5 573.490   1
   1   4   3 21255.8 862.924   6
  -1  -4  -3 19998.2 846.600   6
  -1  -4  -3 20964.3 623.582   5
   1   4   3 20200.8 733.650   3
   1   4   3 24388.6 860.732   4
   1   4   4 10153.5 580.060   6
  -1  -4  -4 8678.41 536.732   6
  -1  -4  -4 10197.1 374.599   5
  -1  -4  -4 8834.86 321.387   1
  -1  -4  -4 9473.99 459.419   3
   1   4   4 9708.95 466.179   3
  -1  -4  -4 9459.48 493.603   4
   1   4   4 9051.81 329.419   1
  -1  -4  -5 791.083 102.853   1
  -1  -4  -5 978.493 148.853   3
  -1  -4  -5 824.216 136.291   4
  -1  -4  -5 898.372 102.662   5
  -1  -4  -5 755.959 159.501   6
  -1  -4  -6 7504.52 428.932   3
  -1  -4  -6 6750.26 516.689   6
  -1  -4  -6 6825.40 368.396   1
  -1  -4  -6 7351.98 309.146   5
  -1  -4  -7 1480.80 190.456   3
  -1  -4  -7 1286.23 120.522   5
  -1  -4  -7 1158.75 160.993   1
  -1  -4  -7 1060.84 228.063   6
  -1  -4  -8 14419.8 658.315   3
  -1  -4  -8 12544.4 811.849   6
  -1  -4  -8 13180.8 439.158   5
  -1  -4  -8 12792.8 659.136   1
  -1  -4  -9 9375.41 352.123   5
  -1  -4  -9 10296.5 568.557   3
  -1  -4  -9 9634.69 751.786   6
  -1  -4 -10 582.619 72.9653   5
  -1  -4 -10 850.311 188.266   3
  -1  -4 -10 467.843 182.917   6
  -1  -4 -11 983.737 207.192   3
  -1  -4 -11 643.714 71.0294   5
  -1  -4 -11 912.405 271.421   6
  -1  -4 -12 4548.07 602.493   6
  -1  -4 -13 1530.88 365.966   6
  -1  -4 -14 508.167 231.006   6
  -1  -4 -15 2984.99 577.859   6
  -1  -4 -16 1310.39 382.484   6
  -1  -4 -17-76.9070 168.054   6
  -1  -4 -18 746.721 390.374   6
   1   5 -16 740.003 430.366   6
   1   5 -15 204.426 288.404   6
   1   5 -14 4147.43 764.927   6
   1   5 -14 3208.46 389.646   2
   1   5 -13 796.260 387.101   6
   1   5 -13 434.269 142.390   2
   1   5 -12 902.363 384.454   6
   1   5 -12 408.040 132.565   2
   1   5 -11 1377.12 218.654   2
   1   5 -11 1796.54 440.612   6
   1   5 -10 53.5932 154.227   6
   1   5 -10 75.5301 62.1362   2
   1   5  -9 2346.97 258.785   2
   1   5  -9 2560.55 478.002   6
   1   5  -8 11452.3 588.117   2
  -1  -5   8 9612.27 375.860   5
   1   5  -8 11256.2 971.199   6
  -1  -5   7 3954.11 237.197   5
   1   5  -7 3878.25 347.179   2
   1   5  -7 4016.70 539.171   6
  -1  -5   6 413.590 76.8791   5
   1   5  -6 534.408 206.583   6
   1   5  -6 567.195 142.569   2
  -1  -5   5 18519.3 611.546   5
   1   5  -5 19410.7 1119.40   6
   1   5  -5 20137.7 838.424   2
   1   5  -4 19001.0 1059.23   6
  -1  -5   4 18268.9 606.603   5
   1   5  -4 20184.8 827.405   2
   1   5  -3-74.3876 75.6770   2
  -1  -5   3 44.5118 57.0800   5
  -1  -5   2 746.440 317.318   4
  -1  -5   2 1513.32 154.840   5
  -1  -5   1 16677.3 560.781   5
  -1  -5   1 5776.25 884.714   4
  -1  -5   0 1003.76 335.463   4
   1   5   0 1017.12 290.605   4
  -1  -5   0 1899.20 175.194   5
   1   5   1 36158.3 1705.12   4
  -1  -5  -1 38983.5 1016.13   5
  -1  -5  -1 32215.6 1805.48   4
  -1  -5  -2 237.329 183.781   4
  -1  -5  -2 416.513 104.721   5
   1   5   2 396.616 146.358   3
   1   5   2 232.883 128.394   4
   1   5   2 256.122 147.813   6
  -1  -5  -3 1102.07 139.264   5
   1   5   3 1148.51 224.535   6
   1   5   3 1280.53 222.280   4
  -1  -5  -3 823.169 205.041   4
  -1  -5  -3 413.883 134.746   6
   1   5   4 7493.57 547.733   6
  -1  -5  -4 5613.18 481.433   6
  -1  -5  -4 8580.23 552.542   4
  -1  -5  -4 7405.96 347.621   5
   1   5   4 8755.37 522.237   4
  -1  -5  -5 8012.83 565.767   6
  -1  -5  -5 8770.75 524.339   4
  -1  -5  -5 9426.63 390.002   5
  -1  -5  -5 7524.98 291.985   1
  -1  -5  -6 7611.05 344.791   5
  -1  -5  -6 6471.91 321.193   1
  -1  -5  -6 6933.48 546.821   6
  -1  -5  -6 7169.88 466.395   4
  -1  -5  -7 612.273 133.077   4
  -1  -5  -7 655.294 116.485   1
  -1  -5  -7 693.428 190.433   6
  -1  -5  -7 744.974 101.132   5
  -1  -5  -8 12101.4 819.017   6
  -1  -5  -8 14426.2 700.230   4
  -1  -5  -8 14150.0 501.260   5
  -1  -5  -8 12843.0 604.620   1
  -1  -5  -9 847.225 106.604   5
  -1  -5  -9 856.785 222.125   6
  -1  -5 -10 1159.73 261.418   6
  -1  -5 -10 1177.70 120.261   5
  -1  -5 -11 4682.50 586.815   6
  -1  -5 -11 4817.92 258.226   5
  -1  -5 -12 3374.51 524.705   6
  -1  -5 -12 3037.06 185.592   5
  -1  -5 -13 216.344 124.925   6
  -1  -5 -14 2491.68 492.229   6
  -1  -5 -15 815.439 312.300   6
  -1  -5 -16 348.431 282.614   6
  -1  -5 -17 1283.52 413.040   6
  -1  -5 -18 125.875 198.436   6
   1   6 -15 1490.12 567.012   6
   1   6 -14-52.0955 54.7195   2
   1   6 -14-92.4022 178.472   6
   1   6 -13 2973.13 364.076   2
   1   6 -13 3626.72 789.873   6
   1   6 -12 5259.33 828.311   6
   1   6 -12 4662.12 442.987   2
   1   6 -11 281.207 234.933   6
   1   6 -11 173.579 102.752   2
   1   6 -10 1491.85 227.339   2
   1   6 -10 1414.21 444.192   6
   1   6  -9 3236.98 571.309   6
   1   6  -9 3796.10 359.264   2
  -1  -6   8 4403.23 270.363   5
   1   6  -8 4954.44 667.892   6
   1   6  -8 4008.25 381.022   2
  -1  -6   7 2584.85 209.155   5
   1   6  -7 3204.04 516.765   6
   1   6  -7 3003.77 341.984   2
   1   6  -6 6298.11 691.838   6
  -1  -6   6 5396.19 315.559   5
   1   6  -6 7092.25 511.287   2
  -1  -6   5 5104.94 304.404   5
   1   6  -5 5811.00 450.488   2
   1   6  -5 5144.62 599.861   6
   1   6  -4 96.4973 79.0428   6
   1   6  -4 10.0985 83.2570   2
  -1  -6   4 99.8159 56.4854   5
   1   6  -3 12298.9 698.575   2
  -1  -6   3 12654.3 518.261   5
  -1  -6   2 2732.56 696.742   4
  -1  -6   2 3834.60 270.255   5
  -1  -6   1 6478.37 358.456   5
  -1  -6   0 1503.51 455.470   4
  -1  -6   0 2548.80 221.544   5
  -1  -6  -1 349.833 249.710   4
  -1  -6  -1 154.895 87.7796   5
  -1  -6  -2 1100.47 157.440   5
  -1  -6  -2 731.895 295.945   4
   1   6   2 342.786 176.655   6
  -1  -6  -3 11466.8 932.602   4
  -1  -6  -3 11444.5 487.546   5
   1   6   3 12152.0 801.034   6
  -1  -6  -4 23231.3 1209.72   4
  -1  -6  -4 26564.2 779.821   5
  -1  -6  -5 1964.69 189.984   5
  -1  -6  -5 1726.51 265.681   4
  -1  -6  -5 1373.20 257.121   6
  -1  -6  -6 5913.65 332.583   5
  -1  -6  -6 4582.30 473.264   6
  -1  -6  -6 5053.75 436.560   4
  -1  -6  -7 1797.17 159.542   1
  -1  -6  -7 1858.57 256.330   4
  -1  -6  -7 1819.48 305.602   6
  -1  -6  -7 2412.69 205.816   5
  -1  -6  -8 773.347 115.542   5
  -1  -6  -8 767.894 169.793   4
  -1  -6  -8 710.689 114.806   1
  -1  -6  -8 858.173 215.454   6
  -1  -6  -9 4404.67 333.249   1
  -1  -6  -9 3781.94 385.561   4
  -1  -6  -9 4234.82 507.831   6
  -1  -6  -9 5131.79 302.882   5
  -1  -6 -10 4937.11 574.898   6
  -1  -6 -10 5086.43 457.930   4
  -1  -6 -10 5388.10 310.962   5
  -1  -6 -11 814.503 261.975   6
  -1  -6 -11 546.114 83.3952   5
  -1  -6 -12 2219.62 424.093   6
  -1  -6 -12 2434.44 198.158   5
  -1  -6 -13 4760.65 658.221   6
  -1  -6 -14 665.256 253.499   6
  -1  -6 -15 787.452 302.552   6
  -1  -6 -16 2607.85 556.051   6
  -1  -6 -17 531.742 305.355   6
  -1  -6 -18 827.815 353.775   6
   1   7 -15 145.463 287.798   6
   1   7 -14 616.057 322.447   6
   1   7 -13 3218.18 396.743   2
   1   7 -13 3001.05 677.785   6
   1   7 -12 283.679 126.523   2
   1   7 -12 520.716 308.652   6
   1   7 -11 1539.48 465.021   6
   1   7 -11 1835.37 271.194   2
   1   7 -10 3066.30 612.482   6
   1   7 -10 2543.63 311.527   2
   1   7  -9 42.0174 119.564   6
   1   7  -9 27.5861 59.8893   2
   1   7  -8 724.604 187.744   2
   1   7  -8 743.897 311.695   6
  -1  -7   8 694.949 121.607   5
  -1  -7   7 2776.72 235.184   5
   1   7  -7 3543.47 609.714   6
   1   7  -7 3227.35 376.674   2
   1   7  -6 911.103 295.099   6
  -1  -7   6 757.840 131.004   5
   1   7  -6 1090.51 211.123   2
   1   7  -5 276.212 150.085   6
  -1  -7   5 488.399 107.607   5
   1   7  -5 550.627 141.599   2
  -1  -7   4 5233.09 337.815   5
   1   7  -4 5142.11 467.602   2
  -1  -7   3 3362.55 268.232   5
  -1  -7   2 1112.05 467.704   4
  -1  -7   2 1076.73 156.393   5
  -1  -7   1 2197.99 219.876   5
  -1  -7   1 715.241 351.046   4
  -1  -7   0 1753.54 529.063   4
  -1  -7   0 3130.72 262.733   5
  -1  -7  -1 6154.65 951.055   4
  -1  -7  -1 7810.53 433.413   5
  -1  -7  -2 7768.28 428.663   5
  -1  -7  -2 5206.29 813.619   4
  -1  -7  -3 3775.84 297.896   5
  -1  -7  -3 3271.26 553.614   4
  -1  -7  -4 317.448 124.522   5
  -1  -7  -4-76.2882 89.2351   4
  -1  -7  -5 17524.8 647.013   5
  -1  -7  -5 14373.6 965.630   4
  -1  -7  -6 9633.57 466.975   5
  -1  -7  -6 7022.19 659.964   6
  -1  -7  -6 9442.28 687.973   4
  -1  -7  -7 246.996 101.304   5
  -1  -7  -7 103.489 113.843   6
  -1  -7  -7 144.767 97.7248   4
  -1  -7  -8 3839.26 409.888   4
  -1  -7  -8 4361.71 506.397   6
  -1  -7  -8 5247.13 336.894   5
  -1  -7  -8 3695.24 227.392   1
  -1  -7  -9 1716.61 331.293   6
  -1  -7  -9 1410.05 162.379   1
  -1  -7  -9 1715.40 272.861   4
  -1  -7  -9 1862.16 197.248   5
  -1  -7 -10 59.3190 56.1548   4
  -1  -7 -10 146.949 63.0583   5
  -1  -7 -10 122.227 41.5795   1
  -1  -7 -10 204.431 140.829   6
  -1  -7 -11 3551.23 514.717   6
  -1  -7 -11 3206.27 392.900   4
  -1  -7 -11 4128.92 292.136   5
  -1  -7 -12 3966.69 277.700   5
  -1  -7 -12 3081.61 503.717   6
  -1  -7 -12 2874.71 392.475   4
  -1  -7 -13 82.0260 89.5758   4
  -1  -7 -13 57.5302 125.770   6
  -1  -7 -13-0.58292 41.8489   5
  -1  -7 -14 3110.10 425.776   4
  -1  -7 -14 3206.90 567.290   6
  -1  -7 -15 6669.16 851.750   6
  -1  -7 -15 5538.95 589.549   4
  -1  -7 -16 1239.17 289.133   4
  -1  -7 -16 1504.97 415.815   6
  -1  -7 -17 451.242 210.012   4
  -1  -7 -17 464.980 297.185   6
  -1  -7 -18 2811.72 650.023   6
  -1  -7 -18 1986.45 409.970   4
  -1  -7 -19 170.136 143.514   4
   1   8 -14 1246.13 489.587   6
   1   8 -13 95.8433 206.880   6
   1   8 -13 10.1823 89.3444   2
   1   8 -12 2075.31 593.590   6
   1   8 -12 2375.90 336.839   2
   1   8 -11 4693.86 825.107   6
   1   8 -11 4305.65 443.097   2
   1   8 -10 408.603 231.296   6
   1   8 -10 143.598 103.825   2
   1   8  -9 1245.09 396.028   6
   1   8  -9 1309.92 255.290   2
   1   8  -8 1394.79 273.981   2
   1   8  -8 1127.18 358.363   6
   1   8  -7 24.4546 172.202   6
   1   8  -7 80.7930 84.6721   2
  -1  -8   7-156.079 91.7007   5
   1   8  -6 1209.71 369.112   6
   1   8  -6 949.076 212.222   2
  -1  -8   6 896.554 141.070   5
   1   8  -5 1037.41 282.370   6
  -1  -8   5 1216.03 170.470   5
   1   8  -5 1254.02 242.689   2
   1   8  -4 2667.15 354.871   2
  -1  -8   4 2276.06 243.217   5
  -1  -8   3 2307.10 743.732   4
  -1  -8   3 5405.24 375.630   5
  -1  -8   2 14483.2 1809.06   4
  -1  -8   2 18527.6 739.351   5
  -1  -8   1 2117.87 714.358   4
  -1  -8   1 7477.46 441.699   5
  -1  -8   0 1725.01 599.280   4
  -1  -8   0 3611.75 302.137   5
  -1  -8  -1 2422.61 675.816   4
  -1  -8  -1 3067.49 289.189   5
  -1  -8  -2 7473.53 439.692   5
  -1  -8  -2 5564.52 898.352   4
  -1  -8  -3 363.341 143.766   5
  -1  -8  -3 406.237 271.929   4
  -1  -8  -4 3570.84 608.533   4
  -1  -8  -4 3834.25 314.702   5
  -1  -8  -5 3838.05 317.932   5
  -1  -8  -5 3528.83 548.409   4
  -1  -8  -6 1894.72 377.323   6
  -1  -8  -6 3626.04 504.209   4
  -1  -8  -6 4403.75 332.376   5
  -1  -8  -7 6863.66 629.293   4
  -1  -8  -7 7266.00 436.385   5
  -1  -8  -7 4563.17 577.373   6
  -1  -8  -8 4858.45 351.590   5
  -1  -8  -8 4211.59 470.022   4
  -1  -8  -8 3583.46 533.999   6
  -1  -8  -9 1045.31 168.887   5
  -1  -8  -9 599.138 177.203   4
  -1  -8  -9 439.420 67.0099   1
  -1  -8  -9 695.778 243.597   6
  -1  -8 -10 8558.68 419.257   1
  -1  -8 -10 9650.99 727.494   4
  -1  -8 -10 9238.67 829.048   6
  -1  -8 -10 13133.5 589.120   5
  -1  -8 -11 3696.44 447.326   4
  -1  -8 -11 3648.75 546.109   6
  -1  -8 -11 4436.61 327.640   5
  -1  -8 -12 9.64625 48.5774   5
  -1  -8 -12 34.8361 73.7407   4
  -1  -8 -12 233.278 203.232   6
  -1  -8 -13 725.788 210.312   4
  -1  -8 -13 694.842 107.311   5
  -1  -8 -13 868.689 292.147   6
  -1  -8 -14 2955.51 537.773   6
  -1  -8 -14 2671.42 410.616   4
  -1  -8 -15 1045.36 359.641   6
  -1  -8 -15 646.902 206.612   4
  -1  -8 -16 181.073 192.897   6
  -1  -8 -16 419.582 188.982   4
  -1  -8 -17 646.532 239.318   4
  -1  -8 -17 866.851 352.568   6
  -1  -8 -18 131.261 244.710   6
  -1  -8 -18 35.4768 141.142   4
  -1  -8 -19 450.747 234.980   4
   1   9 -12 1164.56 249.454   2
   1   9 -12 1604.68 530.557   6
   1   9 -11 145.748 109.810   2
   1   9 -11-95.9004 185.556   6
   1   9 -10 1888.76 535.209   6
   1   9 -10 2504.95 347.792   2
   1   9  -9 3693.21 709.110   6
   1   9  -9 2758.42 385.583   2
   1   9  -8 61.1563 97.8195   2
   1   9  -8 221.472 250.223   6
   1   9  -7 6574.94 868.634   6
  -1  -9   7 4940.17 371.911   5
   1   9  -7 6309.81 589.655   2
  -1  -9   6 6764.91 452.019   5
   1   9  -6 7740.80 913.872   6
   1   9  -6 8083.80 668.893   2
   1   9  -5 425.929 236.539   6
   1   9  -5 421.547 198.128   2
  -1  -9   5 58.3447 55.7083   5
   1   9  -4 1529.24 279.965   2
  -1  -9   4 1507.77 208.706   5
  -1  -9   3 3234.07 958.536   4
  -1  -9   3 6986.19 450.494   5
  -1  -9   2 621.541 503.336   4
  -1  -9   2 721.249 160.831   5
  -1  -9   1 2769.54 289.475   5
  -1  -9   0 4225.39 992.372   4
  -1  -9   0 7380.25 466.530   5
  -1  -9  -1 2250.22 261.274   5
  -1  -9  -1 1486.53 612.638   4
  -1  -9  -2 3517.37 810.112   4
  -1  -9  -2 4332.69 363.057   5
  -1  -9  -3 3301.45 708.989   4
  -1  -9  -3 5122.92 390.683   5
  -1  -9  -4 4505.60 751.534   4
  -1  -9  -4 5372.37 396.219   5
  -1  -9  -5 1141.32 390.818   4
  -1  -9  -5 1937.89 257.304   5
  -1  -9  -6 9537.91 533.428   5
  -1  -9  -6 8111.92 868.341   4
  -1  -9  -7 1248.70 323.988   6
  -1  -9  -7 3958.99 345.069   5
  -1  -9  -7 2989.37 507.259   4
  -1  -9  -8 594.048 244.747   6
  -1  -9  -8 1028.45 264.953   4
  -1  -9  -8 1196.45 193.478   5
  -1  -9  -9 7528.54 470.007   5
  -1  -9  -9 4639.33 619.359   6
  -1  -9  -9 5337.13 579.833   4
  -1  -9 -10 4267.35 348.140   5
  -1  -9 -10 2834.65 484.114   6
  -1  -9 -10 3358.40 446.396   4
  -1  -9 -11 46.0101 68.1310   5
  -1  -9 -11 75.9290 119.925   4
  -1  -9 -11 247.431 185.813   6
  -1  -9 -12 2904.31 283.799   5
  -1  -9 -12 2110.92 368.586   4
  -1  -9 -12 2631.48 484.760   6
  -1  -9 -13 686.569 131.043   5
  -1  -9 -13 843.146 307.972   6
  -1  -9 -13 665.569 228.011   4
  -1  -9 -14 163.519 109.714   4
  -1  -9 -14 325.284 252.965   6
  -1  -9 -15 694.596 234.879   4
  -1  -9 -15 1062.82 381.549   6
  -1  -9 -16 4007.56 710.772   6
  -1  -9 -16 2928.32 474.978   4
  -1  -9 -17 1.84676 79.9428   4
  -1  -9 -17 962.483 404.560   6
  -1  -9 -18 565.005 239.070   4
  -1  -9 -18 1419.54 486.885   6
  -1  -9 -19 574.924 270.688   4
   1  10 -12 136.548 125.532   2
   1  10 -11 1071.54 501.247   6
   1  10 -11 643.389 183.757   2
   1  10 -10 1197.91 470.251   6
   1  10 -10 1234.12 258.808   2
   1  10  -9 365.858 292.508   6
   1  10  -9-118.961 129.837   2
   1  10  -8 3578.11 482.126   2
   1  10  -8 3610.47 687.182   6
   1  10  -7 4923.55 808.351   6
   1  10  -7 5448.47 586.762   2
   1  10  -6 218.722 182.028   6
  -1 -10   6-9.63509 110.718   5
   1  10  -6 251.949 163.363   2
   1  10  -5 2773.54 410.355   2
  -1 -10   5 2595.85 283.420   5
  -1 -10   4 3540.93 340.751   5
   1  10  -4 3574.24 477.083   2
  -1 -10   3 765.568 168.656   5
  -1 -10   3 116.435 306.467   4
  -1 -10   2 2231.28 913.772   4
  -1 -10   2 3409.36 343.346   5
  -1 -10   1 8287.08 533.945   5
  -1 -10   0 958.026 528.846   4
  -1 -10   0 2101.47 275.777   5
  -1 -10  -1 623.699 417.562   4
  -1 -10  -1 1540.63 241.296   5
  -1 -10  -2 1889.96 256.970   5
  -1 -10  -2 1362.53 542.745   4
  -1 -10  -3 334.170 151.217   5
  -1 -10  -3 260.735 288.346   4
  -1 -10  -4 954.745 398.373   4
   1  10   4 591.143 98.7827   1
  -1 -10  -4 922.884 215.381   5
  -1 -10  -5 7918.50 515.113   5
  -1 -10  -5 6403.22 935.795   4
  -1 -10  -6 7570.98 939.106   4
  -1 -10  -6 8204.31 530.321   5
  -1 -10  -7 636.725 168.709   5
  -1 -10  -7 278.892 198.093   4
  -1 -10  -8 1859.30 401.256   4
  -1 -10  -8 2545.52 299.684   5
  -1 -10  -9 1943.77 262.468   5
  -1 -10  -9 1555.67 347.033   4
  -1 -10  -9 460.174 203.124   6
  -1 -10 -10 1735.72 239.773   5
  -1 -10 -10 1328.99 306.285   4
  -1 -10 -10 865.183 273.194   6
  -1 -10 -11 5863.38 436.093   5
  -1 -10 -11 3702.70 513.273   4
  -1 -10 -11 3133.79 558.641   6
  -1 -10 -12 4554.77 380.867   5
  -1 -10 -12 3447.52 495.396   4
  -1 -10 -12 3690.51 609.769   6
  -1 -10 -13 91.6408 98.8247   4
  -1 -10 -13-64.8891 105.119   5
  -1 -10 -13 295.693 256.345   6
  -1 -10 -14 1240.13 399.616   6
  -1 -10 -14 1153.54 171.842   5
  -1 -10 -14 1078.18 274.710   4
  -1 -10 -15 756.444 246.902   4
  -1 -10 -15 1405.92 438.312   6
  -1 -10 -16 426.982 304.323   6
  -1 -10 -16-1.59383 64.0867   4
  -1 -10 -17 842.448 291.295   4
  -1 -10 -17 1614.06 485.736   6
  -1 -10 -18 1773.74 549.211   6
  -1 -10 -18 763.860 272.030   4
   1  11 -11 1445.82 301.667   2
   1  11 -10 413.776 161.057   2
   1  11  -9 2796.31 649.659   6
   1  11  -9 2355.84 398.495   2
   1  11  -8 1782.47 354.244   2
   1  11  -8 1832.24 544.344   6
   1  11  -7-78.6247 112.092   2
   1  11  -7 507.830 304.692   6
  -1 -11   6 3712.03 364.527   5
   1  11  -6 4583.10 555.872   2
   1  11  -6 4432.28 783.993   6
   1  11  -5 2363.58 401.091   2
  -1 -11   5 1617.28 240.189   5
   1  11  -5 1978.40 530.785   6
  -1 -11   4 27.7783 62.8816   5
   1  11  -4-175.176 184.884   2
  -1 -11   3 6625.45 497.074   5
  -1 -11   3 2898.50 1021.93   4
  -1 -11   2 9648.88 1794.01   4
  -1 -11   2 14469.7 748.527   5
  -1 -11   1 963.022 213.700   5
  -1 -11   1-94.3549 345.369   4
  -1 -11   0 1092.02 638.917   4
  -1 -11   0 1181.08 233.606   5
  -1 -11  -1 3810.63 382.301   5
  -1 -11  -1 2025.36 742.439   4
  -1 -11  -2-64.4662 259.654   4
  -1 -11  -2 407.235 171.151   5
  -1 -11  -3 3762.16 870.129   4
  -1 -11  -3 4345.11 407.009   5
   1  11   4 2585.67 222.278   1
  -1 -11  -4 3164.45 752.996   4
  -1 -11  -4 3836.75 378.876   5
  -1 -11  -5 816.539 204.336   5
  -1 -11  -5 520.776 309.489   4
   1  11   5 266.750 53.3197   1
  -1 -11  -6 1308.29 248.632   5
  -1 -11  -6 875.716 414.482   4
  -1 -11  -7 11518.2 1215.40   4
  -1 -11  -7 13509.2 726.475   5
  -1 -11  -8 5228.76 441.435   5
  -1 -11  -8 3895.13 651.266   4
  -1 -11  -9 1620.57 249.057   5
  -1 -11  -9 1048.99 335.718   4
  -1 -11 -10 4972.76 676.531   4
  -1 -11 -10 6121.71 470.847   5
  -1 -11 -11 2296.59 287.302   5
  -1 -11 -11 1638.48 365.934   4
  -1 -11 -11 1006.74 322.522   6
  -1 -11 -12 620.735 285.348   6
  -1 -11 -12 628.965 155.221   5
  -1 -11 -12 867.409 270.646   4
  -1 -11 -13 2694.51 302.644   5
  -1 -11 -13 1951.84 463.829   6
  -1 -11 -13 1984.23 406.799   4
  -1 -11 -14 675.531 131.076   5
  -1 -11 -14 553.272 218.442   4
  -1 -11 -14 440.101 220.958   6
  -1 -11 -15 96.0960 195.720   6
  -1 -11 -15 163.716 89.7666   4
  -1 -11 -16 2559.78 486.939   4
  -1 -11 -16 3304.92 695.443   6
  -1 -11 -17 1147.64 331.458   4
  -1 -11 -17 1927.57 671.804   6
  -1 -11 -18 224.801 172.529   4
  -1 -11 -18 430.810 311.759   6
   1  12 -10 1757.62 351.830   2
   1  12  -9 1221.84 351.611   2
   1  12  -8 550.023 230.764   2
   1  12  -7 1915.43 537.897   6
   1  12  -7 2164.66 397.475   2
  -1 -12   6 1470.90 240.885   5
   1  12  -6 1677.76 513.486   6
   1  12  -6 1690.61 362.812   2
  -1 -12   5-149.121 135.206   5
   1  12  -5 249.533 245.975   6
   1  12  -5 199.383 168.008   2
  -1 -12   4 750.522 172.480   5
   1  12  -4 967.144 242.735   2
  -1 -12   3 1438.55 244.787   5
  -1 -12   3 577.300 577.641   4
  -1 -12   2 132.100 113.230   5
  -1 -12   2 9.46368 271.490   4
  -1 -12   1 4867.13 447.620   5
  -1 -12   1 2348.65 948.771   4
  -1 -12   0 2951.10 1026.94   4
  -1 -12   0 5562.12 479.539   5
  -1 -12  -1 207.507 153.698   5
  -1 -12  -1 225.174 360.592   4
  -1 -12  -2 763.195 488.075   4
  -1 -12  -2 1693.89 271.580   5
  -1 -12  -3 6513.82 522.658   5
  -1 -12  -3 4385.23 1046.53   4
  -1 -12  -4 386.987 186.689   5
  -1 -12  -4 233.670 287.271   4
  -1 -12  -5 4749.83 443.173   5
  -1 -12  -5 3383.40 784.351   4
  -1 -12  -6 1718.86 276.719   5
  -1 -12  -6 1563.48 670.649   4
  -1 -12  -7 123.094 130.200   5
  -1 -12  -7 349.541 327.739   4
  -1 -12  -8 2585.36 330.320   5
  -1 -12  -8 1658.24 496.450   4
  -1 -12  -9 6119.04 884.154   4
  -1 -12  -9 9461.52 622.140   5
  -1 -12 -10 698.353 258.559   4
  -1 -12 -10 1409.15 258.304   5
  -1 -12 -11 1291.24 359.777   4
  -1 -12 -11 1783.21 268.714   5
  -1 -12 -12 3110.14 350.784   5
  -1 -12 -12 1429.47 413.562   6
  -1 -12 -12 2738.50 516.287   4
  -1 -12 -13 635.008 145.329   5
  -1 -12 -13 797.873 279.934   4
  -1 -12 -13 353.181 191.492   6
  -1 -12 -14 283.618 69.9332   5
  -1 -12 -14 335.541 218.020   4
  -1 -12 -14 224.775 249.398   6
  -1 -12 -15 929.026 358.858   6
  -1 -12 -15 1658.42 396.121   4
  -1 -12 -16 1240.32 347.420   4
  -1 -12 -16 1312.78 452.028   6
  -1 -12 -17 204.648 175.288   4
  -1 -12 -17 424.959 327.615   6
  -1 -12 -18 1443.61 400.257   4
   1  13 -10-248.539 168.666   2
   1  13  -9 820.996 282.540   2
   1  13  -8 2226.36 437.140   2
   1  13  -7 716.002 254.101   2
   1  13  -6 655.421 335.489   6
   1  13  -6 732.943 262.308   2
  -1 -13   5 3046.11 375.029   5
   1  13  -5 4319.96 802.346   6
   1  13  -5 4143.85 592.503   2
  -1 -13   4 1195.47 227.243   5
   1  13  -4 1300.72 337.840   2
  -1 -13   3 6.48826 94.5096   5
  -1 -13   2 1964.96 295.034   5
  -1 -13   2 1647.15 854.707   4
  -1 -13   1 376.730 421.533   4
  -1 -13   1 804.491 210.083   5
  -1 -13   0 285.003 435.958   4
  -1 -13   0 272.179 125.451   5
  -1 -13  -1 5543.55 502.435   5
  -1 -13  -1 3321.22 1097.10   4
  -1 -13  -2 5703.16 506.060   5
  -1 -13  -2 3587.44 1079.24   4
  -1 -13  -3 99.0574 485.984   4
  -1 -13  -3 212.371 166.412   5
  -1 -13  -4 5011.01 475.397   5
  -1 -13  -4 3202.53 933.541   4
  -1 -13  -5 2427.37 754.001   4
  -1 -13  -5 3659.54 412.948   5
  -1 -13  -6 1886.75 612.048   4
  -1 -13  -6 2130.03 320.195   5
  -1 -13  -7 4722.00 463.250   5
  -1 -13  -7 3498.69 794.841   4
  -1 -13  -8 2814.17 673.326   4
  -1 -13  -8 4040.79 434.393   5
  -1 -13  -9 874.072 388.462   4
  -1 -13  -9 895.298 222.519   5
  -1 -13 -10 1805.90 497.045   4
  -1 -13 -10 2757.30 360.541   5
  -1 -13 -11 5575.30 506.086   5
  -1 -13 -11 3660.93 689.761   4
  -1 -13 -12 226.116 187.183   4
  -1 -13 -12 107.339 95.0515   5
  -1 -13 -13 2008.75 293.641   5
  -1 -13 -13 1097.67 372.624   4
  -1 -13 -14 1669.21 484.761   6
  -1 -13 -14 3877.91 650.818   4
  -1 -13 -14 4163.00 436.272   5
  -1 -13 -15 1386.91 402.813   4
  -1 -13 -15 800.146 367.537   6
  -1 -13 -16 302.416 252.757   6
  -1 -13 -16 336.883 232.338   4
  -1 -13 -17 1563.63 522.201   6
  -1 -13 -17 1847.88 461.866   4
   1  14  -8 693.633 266.978   2
   1  14  -7 196.519 116.377   2
   1  14  -6 4291.67 609.070   2
   1  14  -5 2540.67 454.384   2
  -1 -14   5 2193.89 324.613   5
  -1 -14   4 62.9016 104.951   5
   1  14  -4 658.324 250.693   2
  -1 -14   3 2558.74 351.071   5
  -1 -14   2 334.765 439.171   4
  -1 -14   2 1124.19 243.787   5
  -1 -14   1 449.641 164.983   5
  -1 -14   1 715.244 700.693   4
  -1 -14   0 1575.67 290.492   5
  -1 -14  -1 1532.18 282.133   5
  -1 -14  -1 886.393 768.720   4
  -1 -14  -2 105.753 126.334   5
  -1 -14  -2 316.584 539.337   4
  -1 -14  -3 1897.04 302.969   5
  -1 -14  -3 985.343 480.422   4
  -1 -14  -4 3312.37 414.190   5
  -1 -14  -4 2193.37 806.343   4
  -1 -14  -5 165.392 418.145   4
  -1 -14  -5 219.387 160.065   5
  -1 -14  -6 3446.28 418.779   5
  -1 -14  -6 2645.00 814.863   4
  -1 -14  -7 4413.58 971.716   4
  -1 -14  -7 4999.25 500.354   5
  -1 -14  -8 497.806 351.969   4
  -1 -14  -8 590.870 195.858   5
  -1 -14  -9 418.371 308.003   4
  -1 -14  -9 634.421 183.924   5
  -1 -14 -10 1778.39 301.762   5
  -1 -14 -10 1558.41 546.478   4
  -1 -14 -11-55.8720 164.914   4
  -1 -14 -11 125.638 112.614   5
  -1 -14 -12 668.172 192.179   5
  -1 -14 -12 424.334 270.239   4
  -1 -14 -13 1042.18 349.432   4
  -1 -14 -13 1301.33 248.983   5
  -1 -14 -14 336.722 107.322   5
  -1 -14 -14 284.476 172.071   4
  -1 -14 -15 365.144 117.626   5
  -1 -14 -15 668.695 305.467   4
  -1 -14 -16 1362.03 393.609   4
  -1 -14 -16 420.894 258.143   6
  -1 -14 -17 130.844 194.902   4
   1  15  -6 784.359 288.562   2
   1  15  -5 716.844 272.714   2
   1  15  -4 4879.85 719.559   2
  -1 -15   4 4364.31 492.976   5
   1  15  -3 598.371 246.092   2
  -1 -15   3 522.898 190.118   5
  -1 -15   2 625.407 693.062   4
  -1 -15   2 647.170 175.976   5
  -1 -15   1 3147.99 407.506   5
  -1 -15   1 2354.92 1131.61   4
  -1 -15   0 818.997 735.119   4
  -1 -15   0 846.212 221.833   5
  -1 -15  -1 194.559 249.119   4
  -1 -15  -1 750.351 211.792   5
  -1 -15  -2 5034.87 521.690   5
  -1 -15  -2 3196.80 1202.16   4
  -1 -15  -3 4596.52 493.735   5
  -1 -15  -3 2121.59 895.386   4
  -1 -15  -4 786.273 224.173   5
  -1 -15  -4 503.402 536.849   4
  -1 -15  -5 2667.62 382.025   5
  -1 -15  -5 1794.65 799.060   4
  -1 -15  -6 2700.24 840.431   4
  -1 -15  -6 4159.40 479.300   5
  -1 -15  -7 220.653 149.319   5
  -1 -15  -7 354.916 302.927   4
  -1 -15  -8 3046.77 411.202   5
  -1 -15  -8 1850.86 641.661   4
  -1 -15  -9 2406.98 366.747   5
  -1 -15  -9 2107.80 719.813   4
  -1 -15 -10 433.117 367.733   4
  -1 -15 -10-2.04959 111.685   5
  -1 -15 -11 2630.38 375.946   5
  -1 -15 -11 2703.19 733.900   4
  -1 -15 -12 2154.80 627.554   4
  -1 -15 -12 2612.41 367.550   5
  -1 -15 -13 225.021 85.3767   5
  -1 -15 -13 461.691 266.889   4
  -1 -15 -14 555.778 322.428   4
  -1 -15 -14 1168.90 247.770   5
  -1 -15 -15 2461.99 613.701   4
  -1 -15 -15 2615.58 364.909   5
  -1 -15 -16-87.1657 146.024   4
   1  16  -4 335.964 207.463   2
  -1 -16   3-34.8316 132.174   5
   1  16  -3 677.680 261.254   2
  -1 -16   2 2374.47 363.467   5
  -1 -16   2 1111.23 778.953   4
  -1 -16   1 666.159 771.683   4
  -1 -16   1 825.807 244.498   5
  -1 -16   0 806.990 767.204   4
  -1 -16   0 413.746 165.559   5
  -1 -16  -1 3828.49 477.685   5
  -1 -16  -2 1096.04 267.233   5
  -1 -16  -2 1389.26 900.124   4
  -1 -16  -3 153.106 493.533   4
  -1 -16  -3 370.581 174.123   5
  -1 -16  -4 1031.60 258.951   5
  -1 -16  -4 1471.31 822.786   4
  -1 -16  -5 487.212 183.916   5
  -1 -16  -5 547.733 745.193   4
  -1 -16  -6 530.541 538.782   4
  -1 -16  -6 375.455 177.342   5
  -1 -16  -7 3337.04 448.722   5
  -1 -16  -7 2170.88 796.045   4
  -1 -16  -8 1072.77 590.235   4
  -1 -16  -8 1655.45 324.041   5
  -1 -16  -9 705.319 235.172   5
  -1 -16  -9 334.348 266.293   4
  -1 -16 -10 2967.05 420.744   5
  -1 -16 -10 2039.43 697.432   4
  -1 -16 -11 1615.85 596.493   4
  -1 -16 -11 1872.48 331.927   5
  -1 -16 -12-84.3047 158.183   5
  -1 -16 -12 141.376 264.188   4
  -1 -16 -13 1403.63 546.091   4
  -1 -16 -13 1928.71 333.698   5
  -1 -16 -14 2008.12 593.464   4
  -1 -16 -14 2847.49 423.363   5
  -1 -16 -15 377.284 282.763   4
  -1 -16 -15-164.968 180.005   5
  -1 -17   3 1560.48 298.172   5
  -1 -17   2-102.712 167.111   5
  -1 -17   1 589.028 664.096   4
  -1 -17   1 607.721 174.737   5
  -1 -17   0 1618.32 298.566   5
  -1 -17   0 1223.79 882.027   4
  -1 -17  -1 738.833 1065.20   4
  -1 -17  -1 1325.09 293.307   5
  -1 -17  -2 611.402 723.127   4
  -1 -17  -2 350.612 173.205   5
  -1 -17  -3 3781.08 489.861   5
  -1 -17  -3 1638.56 864.581   4
  -1 -17  -4 306.048 511.165   4
  -1 -17  -4 401.316 179.157   5
  -1 -17  -5 1014.29 260.988   5
  -1 -17  -5 1367.69 782.339   4
  -1 -17  -6 2394.25 1026.99   4
  -1 -17  -6 2778.98 430.330   5
  -1 -17  -7 535.009 454.071   4
  -1 -17  -7 547.243 201.225   5
  -1 -17  -8 222.730 148.422   5
  -1 -17  -8 348.051 336.617   4
  -1 -17  -9 1899.51 349.857   5
  -1 -17  -9 820.368 463.621   4
  -1 -17 -10 544.933 210.519   5
  -1 -17 -10 1279.46 692.643   4
  -1 -17 -11 358.460 421.740   4
  -1 -17 -11 119.522 94.1412   5
  -1 -17 -12 2425.71 382.947   5
  -1 -17 -12 1437.82 580.939   4
  -1 -17 -13 2873.41 424.127   5
  -1 -17 -13 1819.98 623.856   4
  -1 -17 -14-39.7980 159.090   5
  -1 -17 -14 895.314 440.591   4
  -1 -17 -15 1198.46 537.688   4
  -1 -17 -15 1429.00 276.729   5
  -1 -18   0-179.135 156.826   5
  -1 -18  -1 423.468 170.284   5
  -1 -18  -1 1139.81 984.418   4
  -1 -18  -2 2403.25 418.221   5
  -1 -18  -3 576.532 835.054   4
  -1 -18  -3 682.510 216.938   5
  -1 -18  -4 1506.86 918.203   4
  -1 -18  -4 1279.83 292.377   5
  -1 -18  -5 825.071 719.654   4
  -1 -18  -5 2439.84 397.394   5
  -1 -18  -6 1031.22 754.989   4
  -1 -18  -6 446.500 182.041   5
  -1 -18  -7 1458.52 780.659   4
  -1 -18  -7 1501.41 319.959   5
  -1 -18  -8 3957.12 517.420   5
  -1 -18  -8 2383.33 866.881   4
  -1 -18  -9 722.221 467.350   4
  -1 -18  -9 1211.55 305.368   5
  -1 -18 -10 124.759 91.0812   5
  -1 -18 -10 221.139 351.534   4
  -1 -18 -11 1074.20 617.115   4
  -1 -18 -11 1129.19 276.252   5
  -1 -18 -12 652.670 474.461   4
  -1 -18 -12 761.399 245.323   5
  -1 -18 -13 294.550 474.806   4
  -1 -18 -14 1491.54 626.319   4
  -1 -19  -5 587.574 608.570   4
  -1 -19  -6 58.9782 441.893   4
  -1 -19  -7 1065.94 795.818   4
  -1 -19  -8 729.663 723.069   4
  -1 -19  -9 1312.72 732.975   4
  -1 -19 -10 1753.09 764.013   4
  -1 -19 -11 548.615 445.522   4
  -1 -19 -12 365.652 500.228   4
   2 -18  -7 2266.66 888.612   4
   2 -18  -6 1232.82 733.402   4
   2 -17 -13 1077.60 328.577   5
   2 -17 -12 3006.87 494.190   5
   2 -17 -12 1365.72 570.776   4
   2 -17 -11 1552.75 634.336   4
   2 -17 -10 992.375 573.781   4
   2 -17  -9 1277.42 648.011   4
   2 -17  -8 140.035 302.400   4
   2 -17  -7 203.069 395.290   4
   2 -17  -6 432.508 454.991   4
   2 -17  -5 1560.11 833.835   4
   2 -17  -4 568.349 689.042   4
   2 -17  -3 2298.54 1057.97   4
   2 -17  -2 1325.44 846.879   4
   2 -17  -1 737.206 896.629   4
   2 -17   0 2336.04 407.499   5
   2 -17   1 1958.14 377.244   5
   2 -17   2 617.065 248.432   5
   2 -17   3 1643.28 360.614   5
   2 -16 -15 769.396 278.724   5
   2 -16 -14 1438.92 335.575   5
   2 -16 -14 221.664 226.912   4
   2 -16 -13 2125.10 411.640   5
   2 -16 -13 579.067 292.508   4
   2 -16 -12 534.017 331.799   4
   2 -16 -11 920.891 488.975   4
   2 -16 -10 2479.03 735.441   4
   2 -16  -9 1017.88 493.388   4
   2 -16  -8 1807.43 670.125   4
   2 -16  -7 1847.68 681.838   4
   2 -16  -6 378.955 381.811   4
   2 -16  -5 355.680 471.984   4
   2 -16  -4 1537.06 750.175   4
   2 -16  -3 1970.43 857.843   4
   2 -16  -2 883.578 828.234   4
   2 -16  -1 2524.47 1166.70   4
   2 -16   0 1765.33 1075.83   4
   2 -16   2 1522.48 1066.35   4
   2 -16   2 2734.81 426.382   5
   2 -16   3 2745.10 414.388   5
  -2  16  -4-394.550 276.796   2
   2 -15 -15 2776.03 424.373   5
   2 -15 -15 2189.20 571.893   4
   2 -15 -14 2139.50 392.218   5
   2 -15 -14 720.963 351.864   4
   2 -15 -13 166.265 194.040   4
   2 -15 -12 635.194 343.533   4
   2 -15 -11 1816.65 561.257   4
   2 -15 -10 179.736 279.331   4
   2 -15  -9 2167.90 696.001   4
   2 -15  -8 4844.27 1035.69   4
   2 -15  -7 296.027 299.799   4
   2 -15  -6 953.586 556.743   4
   2 -15  -5 1600.48 687.923   4
   2 -15  -4 1191.53 750.767   4
   2 -15  -3 60.8321 271.760   4
   2 -15  -2 2695.06 1050.55   4
   2 -15  -1 1297.57 784.007   4
   2 -15   0 25.2079 279.242   4
   2 -15   1 1221.69 879.132   4
   2 -15   2 1249.23 1142.36   4
   2 -15   3 244.110 757.592   4
   2 -15   4 2275.93 1389.24   4
   2 -15   4 3182.11 438.869   5
  -2  15  -5 982.509 318.415   2
  -2  15  -6-15.0722 286.018   6
   2 -14 -16 2192.97 552.752   4
   2 -14 -15 2295.70 554.358   4
   2 -14 -14 241.281 240.364   4
   2 -14 -14 570.027 261.986   5
   2 -14 -13 551.645 276.436   4
   2 -14 -12 684.335 327.636   4
   2 -14 -11 2.66923 144.553   4
   2 -14 -10 1350.00 467.919   4
   2 -14  -9 1979.83 592.568   4
   2 -14  -8 281.025 273.683   4
   2 -14  -7 1674.23 603.802   4
   2 -14  -6 2004.34 654.831   4
   2 -14  -5 1475.34 659.155   4
   2 -14  -4 11.0900 178.881   4
   2 -14  -3 1638.86 738.858   4
   2 -14  -2 599.068 636.877   4
   2 -14  -1 521.782 583.884   4
   2 -14   0 2019.07 1017.70   4
   2 -14   1 850.740 733.340   4
   2 -14   3 3055.70 1304.57   4
   2 -14   4 1954.64 1050.82   4
   2 -14   5 889.686 245.924   5
  -2  14  -5 98.8595 116.221   2
  -2  14  -6 1285.80 619.744   6
  -2  14  -7 1472.54 606.009   6
   2 -13 -17 562.423 326.171   4
   2 -13 -16 1881.52 479.144   4
   2 -13 -15 424.654 263.324   4
   2 -13 -14 1697.79 461.146   4
   2 -13 -13 1122.55 376.467   4
   2 -13 -12 141.799 117.644   4
   2 -13 -11 1514.47 429.380   4
   2 -13 -10 4122.47 743.535   4
   2 -13  -9 131.611 157.958   4
   2 -13  -8 247.513 201.863   4
   2 -13  -7 931.609 430.841   4
   2 -13  -6 61.1293 140.293   4
   2 -13  -5 704.456 480.916   4
   2 -13  -4 5515.08 1135.02   4
   2 -13  -3 2218.98 780.517   4
   2 -13  -2 237.253 199.819   4
   2 -13  -1 1779.33 820.384   4
   2 -13   0 298.649 560.763   4
   2 -13   1 348.072 562.228   4
   2 -13   2 561.400 692.122   4
   2 -13   3 1368.55 857.258   4
   2 -13   4 713.553 734.490   4
  -2  13  -5 2215.03 441.551   2
  -2  13  -6 701.417 266.730   2
  -2  13  -6-77.4793 252.350   6
  -2  13  -7 348.052 400.311   6
  -2  13  -8 1827.52 731.356   6
   2 -12 -17-45.0486 138.481   4
   2 -12 -16-11.3709 101.361   4
   2 -12 -15 1485.53 396.564   4
   2 -12 -14 1706.15 430.369   4
   2 -12 -13 247.205 187.327   4
   2 -12 -12 1828.41 439.847   4
   2 -12 -11 1347.28 375.729   4
   2 -12 -10 398.644 228.410   4
   2 -12  -9 3517.86 648.549   4
   2 -12  -8 3919.74 722.383   4
   2 -12  -7 69.6016 190.257   4
   2 -12  -6 3479.48 770.687   4
   2 -12  -5 4743.81 932.044   4
   2 -12  -4 162.400 161.054   4
   2 -12  -3 571.785 371.726   4
   2 -12  -2 891.210 473.104   4
   2 -12  -1 61.0442 190.688   4
   2 -12   0 4283.57 1256.56   4
   2 -12   1 4887.45 1379.66   4
   2 -12   2 522.841 523.064   4
   2 -12   3-184.982 376.150   4
   2 -12   4 2782.66 1104.90   4
   2 -12   5 1057.29 703.480   4
  -2  12  -5 637.515 227.542   2
  -2  12  -6 567.031 221.617   2
  -2  12  -7 2053.87 624.018   6
  -2  12  -7 2351.81 420.231   2
  -2  12  -8 2193.39 679.395   6
  -2  12  -9 723.024 522.461   6
  -2  12 -10 2097.46 724.112   6
   2 -11 -18 410.363 233.438   4
   2 -11 -17 351.535 211.565   4
   2 -11 -17 89.4478 246.717   6
   2 -11 -16 1126.00 366.681   4
   2 -11 -16 415.233 284.240   6
   2 -11 -15 34.6191 202.195   6
   2 -11 -15 148.986 157.685   4
   2 -11 -14 302.739 243.068   6
   2 -11 -14 70.8851 80.2538   4
   2 -11 -13 2719.55 501.529   4
   2 -11 -12 1837.18 417.808   4
   2 -11 -11 62.5694 91.2277   4
   2 -11 -10 1806.25 406.906   4
   2 -11  -9 2299.52 476.565   4
   2 -11  -8 76.5008 109.309   4
   2 -11  -7 5033.59 787.330   4
   2 -11  -6 2300.18 566.713   4
   2 -11  -5 218.204 223.348   4
   2 -11  -4 4727.31 961.609   4
   2 -11  -3 6029.17 1128.79   4
   2 -11  -2 248.629 325.690   4
   2 -11  -1-256.570 271.653   4
   2 -11   0 2190.56 867.739   4
   2 -11   1 318.303 529.057   4
   2 -11   2 4709.18 1341.05   4
   2 -11   4 2101.59 1081.49   4
   2 -11   5 358.483 492.225   4
  -2  11  -6 3169.98 467.376   2
  -2  11  -7 1284.94 493.436   6
  -2  11  -7 1302.97 288.693   2
  -2  11  -8 369.994 182.097   2
  -2  11  -8 335.639 348.519   6
  -2  11  -9 1650.05 601.870   6
  -2  11 -10 1333.71 606.351   6
  -2  11 -11 386.949 354.016   6
   2 -10 -18 697.807 292.406   4
   2 -10 -17 928.266 406.273   6
   2 -10 -17 684.069 281.436   4
   2 -10 -16 329.866 287.059   6
   2 -10 -16 224.354 173.956   4
   2 -10 -15 1818.92 407.885   4
   2 -10 -15 1982.30 552.305   6
   2 -10 -14 3122.19 530.197   4
   2 -10 -14 2516.20 603.261   6
   2 -10 -13 260.488 169.764   4
   2 -10 -13 63.7936 185.803   6
   2 -10 -12 1577.79 357.961   4
   2 -10 -12 913.219 389.748   6
   2 -10 -11 4824.62 626.199   4
   2 -10 -10 536.402 218.029   4
   2 -10  -9 330.960 180.061   4
   2 -10  -8 3295.31 528.851   4
   2 -10  -7 2709.94 502.335   4
   2 -10  -6 435.351 239.775   4
   2 -10  -5 4003.27 714.503   4
   2 -10  -4 6454.89 982.467   4
   2 -10  -3 303.877 260.995   4
   2 -10  -2 12558.9 1555.11   4
   2 -10  -1 3157.74 843.274   4
   2 -10   0 159.472 396.266   4
   2 -10   1 942.031 601.463   4
   2 -10   2 2343.19 857.849   4
   2 -10   3 244.362 493.976   4
   2 -10   4 5753.56 1492.68   4
   2 -10   5 3903.47 1260.33   4
  -2  10  -6 1736.47 315.320   2
  -2  10  -7 1254.21 514.510   6
  -2  10  -7 856.976 234.844   2
  -2  10  -8 2410.06 647.226   6
  -2  10  -8 2034.60 344.918   2
  -2  10  -9 842.112 397.191   6
  -2  10 -10 664.446 417.963   6
  -2  10 -11 2301.97 697.208   6
  -2  10 -12 429.349 405.098   6
   2  -9 -18 573.524 262.223   4
   2  -9 -17 128.680 315.397   6
   2  -9 -17 28.2326 126.631   4
   2  -9 -16 954.486 380.031   6
   2  -9 -16 683.899 257.381   4
   2  -9 -15 2727.24 613.571   6
   2  -9 -15 2408.46 458.499   4
   2  -9 -14 361.116 172.124   4
   2  -9 -14 546.623 311.184   6
   2  -9 -13 1975.29 391.481   4
   2  -9 -13 2172.92 506.967   6
   2  -9 -12 4960.73 605.985   4
   2  -9 -12 3576.11 642.259   6
   2  -9 -11 1213.61 298.996   4
   2  -9 -11 774.955 285.746   6
   2  -9 -10-1.57403 57.3924   4
   2  -9  -9 1632.77 329.551   4
   2  -9  -9 656.884 86.0196   1
   2  -9  -8 1056.48 282.570   4
   2  -9  -7-10.0864 71.4231   4
   2  -9  -6 1314.80 342.277   4
   2  -9  -5 363.867 215.354   4
   2  -9  -4 741.764 317.753   4
  -2   9   3 13482.9 677.313   1
   2  -9  -3 11215.3 1279.95   4
   2  -9  -2 11062.8 1367.88   4
   2  -9  -1 57.4324 223.427   4
   2  -9   0 3431.56 876.501   4
   2  -9   1 955.378 588.029   4
   2  -9   2-4.87695 269.168   4
   2  -9   3 498.030 544.152   4
   2  -9   4 4636.32 1210.19   4
   2  -9   5-23.2777 353.505   4
  -2   9  -6 5390.71 541.305   2
  -2   9  -7 2359.54 348.649   2
  -2   9  -7 2988.29 671.017   6
  -2   9  -8 210.392 318.711   6
  -2   9  -8-6.46531 73.7757   2
  -2   9  -9 2061.45 606.285   6
  -2   9  -9 2188.70 337.634   2
  -2   9 -10 1022.37 471.596   6
  -2   9 -11 902.932 425.832   6
  -2   9 -12 374.866 349.188   6
   2  -8 -18 24.0130 124.635   4
   2  -8 -18 324.398 295.858   6
   2  -8 -17 1355.14 455.512   6
   2  -8 -17 552.499 235.574   4
   2  -8 -16 1592.61 507.924   6
   2  -8 -16 1718.73 388.264   4
   2  -8 -15 403.527 193.140   4
   2  -8 -15 427.858 275.449   6
   2  -8 -14 740.756 329.953   6
   2  -8 -14 435.293 194.881   4
   2  -8 -13 1744.06 355.161   4
   2  -8 -13 1582.63 435.276   6
   2  -8 -12 2578.46 526.212   6
   2  -8 -12 1585.73 325.080   4
   2  -8 -11 3345.76 577.026   6
   2  -8 -11 3690.35 487.326   4
   2  -8 -10 5808.86 772.242   6
   2  -8 -10 7594.95 703.627   4
   2  -8  -9 231.005 155.565   6
   2  -8  -9 549.760 175.167   4
   2  -8  -8 19.1489 28.8057   1
   2  -8  -8-71.1829 116.940   4
   2  -8  -7 1907.30 346.107   4
   2  -8  -7 1178.52 121.499   1
   2  -8  -6 193.633 50.4944   1
   2  -8  -6 207.891 132.359   4
   2  -8  -5 1157.77 310.045   4
   2  -8  -5 1199.48 130.750   1
   2  -8  -4 2254.23 460.950   4
   2  -8  -3 4717.23 735.701   4
  -2   8   3 5295.98 388.347   1
  -2   8   2 1268.27 209.073   1
   2  -8  -2 1339.55 413.013   4
   2  -8  -1 17028.8 1667.85   4
   2  -8   0 5954.72 1083.28   4
   2  -8   1 50.9834 194.288   4
   2  -8   2 451.360 315.836   4
   2  -8   3 1064.84 678.067   4
   2  -8   4 503.386 496.166   4
   2  -8   5 3430.90 1090.97   4
  -2   8  -6 4634.79 464.607   2
  -2   8  -7 635.556 173.171   2
  -2   8  -7 630.124 292.350   6
  -2   8  -8 5310.30 892.213   6
  -2   8  -8 5604.66 503.830   2
  -2   8  -9 3557.27 733.705   6
  -2   8  -9 3158.26 380.191   2
  -2   8 -10 280.056 269.631   6
  -2   8 -11 1848.27 584.892   6
  -2   8 -12 2153.28 689.035   6
  -2   8 -13 914.239 466.141   6
   2  -7 -18 775.971 289.931   4
   2  -7 -18 1589.54 503.262   6
   2  -7 -17 1073.13 433.990   6
   2  -7 -17 661.682 281.165   4
   2  -7 -16 384.244 193.227   4
   2  -7 -16 443.247 276.870   6
   2  -7 -15 1288.22 412.847   6
   2  -7 -15 1097.85 291.768   4
   2  -7 -14 3368.69 609.190   6
   2  -7 -14 2808.03 448.497   4
   2  -7 -13 221.639 158.192   6
   2  -7 -13 130.781 99.1447   4
   2  -7 -12 196.016 127.312   4
   2  -7 -12 220.740 184.959   6
   2  -7 -11 2986.72 426.530   4
   2  -7 -11 3383.02 576.823   6
   2  -7 -10 278.400 133.870   4
   2  -7 -10 295.461 226.553   6
   2  -7  -9 7082.65 632.895   4
   2  -7  -9 5688.36 722.977   6
   2  -7  -8 3931.38 595.908   6
   2  -7  -8 6503.02 599.870   4
   2  -7  -7 961.251 226.498   4
   2  -7  -6 2264.76 346.939   4
   2  -7  -6 1892.88 165.294   1
   2  -7  -5 4995.38 273.325   1
   2  -7  -5 6113.37 616.939   4
   2  -7  -4 2701.65 457.326   4
   2  -7  -4 2830.30 211.598   1
   2  -7  -3 151.104 172.635   4
   2  -7  -3 29.3821 62.7997   1
   2  -7  -2 6935.21 880.634   4
  -2   7   2 6861.75 460.000   1
   2  -7  -1 185.377 183.715   4
   2  -7   0 849.157 391.629   4
   2  -7   1 5022.20 970.849   4
   2  -7   2 1221.12 534.676   4
   2  -7   3 725.603 478.544   4
   2  -7   4 3785.58 1016.33   4
   2  -7   5 2491.39 899.602   4
  -2   7  -5 4309.92 423.717   2
  -2   7  -6 54.5170 50.9570   2
  -2   7  -6 369.739 247.754   6
  -2   7  -7 3626.82 686.719   6
  -2   7  -7 3499.54 371.376   2
  -2   7  -8 8401.93 587.217   2
  -2   7  -8 8530.71 1086.98   6
  -2   7  -9 216.790 96.7873   2
  -2   7  -9 398.004 296.003   6
  -2   7 -10 3131.78 697.151   6
  -2   7 -10 3313.38 330.458   2
  -2   7 -11 1671.51 578.052   6
  -2   7 -12 712.853 443.870   6
  -2   7 -13 745.728 446.376   6
  -2   7 -14 835.022 487.628   6
   2  -6 -18 1219.42 467.350   6
   2  -6 -17 764.195 347.093   6
   2  -6 -16 1079.43 417.241   6
   2  -6 -15 1890.33 487.741   6
   2  -6 -14 554.815 281.540   6
   2  -6 -13 6950.57 821.506   6
   2  -6 -12 3856.62 589.019   6
   2  -6 -12 3264.79 436.748   4
   2  -6 -11 251.801 132.994   4
   2  -6 -11 333.966 225.642   6
   2  -6 -10 5027.72 514.440   4
   2  -6 -10 4743.59 620.531   6
   2  -6  -9 7278.07 766.283   6
   2  -6  -9 7515.54 621.822   4
   2  -6  -8 1179.60 297.411   6
   2  -6  -8 1369.28 258.556   4
   2  -6  -7 1729.86 290.374   4
   2  -6  -7 1127.78 303.713   6
   2  -6  -6 6693.26 574.127   4
   2  -6  -5 156.800 109.258   4
   2  -6  -5 54.7219 38.8222   1
   2  -6  -4 10725.0 761.112   4
   2  -6  -4 7816.44 373.640   1
   2  -6  -3 12705.7 953.103   4
   2  -6  -3 13867.5 540.770   1
  -2   6   2 2564.52 261.597   1
   2  -6  -2 2142.84 442.835   4
   2  -6  -2 2009.08 213.760   1
   2  -6  -1 7207.48 891.014   4
  -2   6   1 6906.02 466.964   1
   2  -6   0 7260.97 979.768   4
   2  -6   1 4251.62 824.572   4
   2  -6   2 147.549 399.012   4
   2  -6   3 3619.72 941.345   4
   2  -6   4 9378.48 1457.93   4
  -2   6  -5-18.4350 66.3031   2
   2  -6   5 36.8743 179.667   4
  -2   6  -6 5310.56 768.632   6
  -2   6  -6 5529.10 430.587   2
  -2   6  -7 2901.60 306.199   2
  -2   6  -7 3495.62 657.764   6
  -2   6  -8 452.356 249.944   6
  -2   6  -8 637.358 169.528   2
  -2   6  -9 3895.09 711.029   6
  -2   6  -9 3965.08 342.346   2
  -2   6 -10 7642.50 1030.97   6
  -2   6 -10 7449.08 462.434   2
  -2   6 -11 0.38052 147.615   6
  -2   6 -12 2390.17 649.298   6
  -2   6 -13 1885.45 651.993   6
  -2   6 -14 704.097 481.100   6
   2  -5 -18 1371.98 501.144   6
   2  -5 -17 2300.06 579.472   6
   2  -5 -16 804.872 348.062   6
   2  -5 -15 314.407 252.721   6
   2  -5 -14 2864.44 553.995   6
   2  -5 -13 3494.73 586.930   6
   2  -5 -12 265.378 176.680   6
   2  -5 -11 2764.67 475.573   6
   2  -5 -10 2237.56 409.290   6
   2  -5  -9 1135.72 293.620   6
   2  -5  -8 10338.3 682.246   4
   2  -5  -8 9291.52 811.864   6
   2  -5  -7 10726.4 860.347   6
   2  -5  -7 10475.4 678.294   4
   2  -5  -6 3902.70 523.657   6
   2  -5  -6 5346.61 471.765   4
   2  -5  -5 553.839 146.570   4
   2  -5  -4 4881.47 465.361   4
   2  -5  -4 4565.99 269.064   1
   2  -5  -3 3677.97 253.779   1
   2  -5  -3 3701.85 431.787   4
   2  -5  -2 8725.17 767.228   4
   2  -5  -2 8834.49 431.916   1
  -2   5   2 11077.6 521.151   1
   2  -5  -1 18445.5 1294.28   4
   2  -5  -1 15584.7 664.497   1
  -2   5   1 17397.9 739.187   1
   2  -5   0 1215.39 360.233   4
   2  -5   0 891.581 162.591   1
  -2   5   0 994.314 178.374   1
   2  -5   1 2363.43 556.923   4
   2  -5   2 4486.84 870.188   4
   2  -5   3 1063.24 495.711   4
   2  -5   4 1138.16 508.318   4
  -2   5  -5 12837.7 634.564   2
   2  -5   5 6265.66 1132.85   4
  -2   5  -6 7498.81 459.010   2
  -2   5  -6 7144.86 855.224   6
  -2   5  -7 58.0826 55.6413   2
  -2   5  -7 54.7500 191.709   6
  -2   5  -8 5357.23 782.034   6
  -2   5  -8 4099.15 328.940   2
  -2   5  -9 2757.05 574.521   6
  -2   5  -9 2695.88 246.674   2
  -2   5 -10 166.199 69.9064   2
  -2   5 -10 108.974 195.795   6
  -2   5 -11 722.611 400.623   6
  -2   5 -11 692.527 141.788   2
  -2   5 -12 2287.88 592.449   6
  -2   5 -13-81.7628 142.934   6
  -2   5 -14 3686.10 867.595   6
  -2   5 -15 1658.76 620.953   6
   2  -4 -18 1646.62 518.830   6
   2  -4 -17 1294.29 424.330   6
   2  -4 -16 625.547 347.509   6
   2  -4 -15 1026.01 341.924   6
   2  -4 -14 402.269 208.462   6
   2  -4 -13 1101.04 351.529   6
   2  -4 -12 3057.27 502.274   6
   2  -4 -11 5616.40 657.982   6
   2  -4 -10 98.3352 132.178   6
   2  -4  -9 8517.21 751.084   6
   2  -4  -8 3782.80 480.332   6
   2  -4  -7-20.7192 67.6704   6
   2  -4  -6 403.933 124.436   4
   2  -4  -6 384.631 153.562   6
   2  -4  -5 4707.60 540.502   6
   2  -4  -5 5877.26 454.047   4
   2  -4  -4 6689.17 491.471   4
   2  -4  -3 12287.9 486.748   1
   2  -4  -3 13655.6 734.710   4
   2  -4  -2 29883.8 937.110   1
   2  -4  -2 38201.0 1385.05   4
  -2   4   1 1719.18 202.087   1
   2  -4  -1 1437.17 168.537   1
   2  -4  -1 1383.67 281.380   4
  -2   4   0 12607.0 619.142   1
   2  -4   0 13227.5 1052.20   4
   2  -4   0 11618.5 564.603   1
   2  -4   1 9134.64 987.964   4
   2  -4   1 8062.98 496.732   1
  -2   4  -1 8891.42 529.379   1
   2  -4   2 226.158 195.575   4
   2  -4   3 1283.01 486.116   4
   2  -4   4 4655.95 872.210   4
  -2   4  -5 1802.65 197.072   2
  -2   4  -5 2120.14 431.272   6
  -2   4  -6 4358.10 308.752   2
  -2   4  -6 5082.33 670.019   6
  -2   4  -7 4551.22 316.005   2
  -2   4  -7 5393.92 708.769   6
  -2   4  -8 3429.28 596.685   6
  -2   4  -8 3626.81 262.771   2
  -2   4  -9 472.271 99.8292   2
  -2   4  -9 614.946 279.140   6
  -2   4 -10 7277.71 420.190   2
  -2   4 -10 7638.07 962.764   6
  -2   4 -11 2412.90 565.162   6
  -2   4 -11 2275.84 235.681   2
  -2   4 -12-232.257 220.825   6
  -2   4 -12-29.4349 50.6560   2
  -2   4 -13 1213.23 481.951   6
  -2   4 -14 1808.02 573.153   6
  -2   4 -15 259.054 345.523   6
  -2   4 -16 1260.37 563.740   6
   2  -3 -18 200.491 196.304   6
   2  -3 -17 781.918 367.981   6
   2  -3 -16 3356.12 656.458   6
   2  -3 -15 1537.84 421.359   6
   2  -3 -14 138.923 136.590   6
   2  -3 -13 1902.58 424.678   6
   2  -3 -12 141.746 85.6950   6
   2  -3 -11 21.8152 102.430   6
   2  -3 -10 8479.91 761.102   6
   2  -3 -10 8612.39 554.235   2
   2  -3  -9 6278.70 624.561   6
   2  -3  -9 6335.45 448.165   2
   2  -3  -8 2135.88 241.889   2
   2  -3  -8 2414.71 375.012   6
   2  -3  -7 15176.0 918.051   6
   2  -3  -6 8567.17 655.296   6
   2  -3  -5 2222.16 340.267   6
   2  -3  -4 3057.45 291.500   4
   2  -3  -4 1984.58 327.579   6
  -2   3   3 321.894 187.666   6
   2  -3  -3 253.790 89.4708   4
  -2   3   3 234.791 65.8582   2
   2  -3  -2 2587.95 205.190   1
   2  -3  -2 2845.93 292.759   4
  -2   3   2 3264.52 309.172   4
   2  -3  -1 49981.2 1484.60   1
  -2   3   1 58186.6 1562.82   1
  -2   3   1 62818.8 1834.79   4
   2  -3  -1 56772.6 1851.87   4
   2  -3   0 674.610 211.605   4
  -2   3   0 558.871 178.132   4
  -2   3   0 649.160 134.503   1
   2  -3   0 658.580 130.303   1
  -2   3  -1 375.214 180.436   4
  -2   3  -1 360.390 110.210   1
   2  -3   1 300.996 101.268   1
   2  -3   1 308.891 155.954   4
  -2   3  -2 6135.28 683.104   4
   2  -3   2 4692.13 729.719   4
  -2   3  -2 6072.00 437.287   1
   2  -3   2 6268.75 445.948   1
   2  -3   3 10861.2 1144.40   4
  -2   3  -4 489.474 90.2712   2
   2  -3   4 577.257 359.618   4
  -2   3  -5 4635.05 275.804   2
  -2   3  -5 4668.24 568.942   6
  -2   3  -6 6446.11 339.797   2
  -2   3  -6 6618.88 714.131   6
  -2   3  -7 74.6642 44.6721   2
  -2   3  -7 122.529 168.073   6
  -2   3  -8 415.380 84.2032   2
  -2   3  -8 339.944 204.793   6
  -2   3  -9 3169.46 238.327   2
  -2   3  -9 3782.16 614.828   6
  -2   3 -10 599.779 111.923   2
  -2   3 -10 961.567 334.622   6
  -2   3 -11 3852.16 302.983   2
  -2   3 -11 5002.70 777.756   6
  -2   3 -12 4302.97 343.908   2
  -2   3 -12 4564.79 794.451   6
  -2   3 -13 1035.84 436.482   6
  -2   3 -14 114.174 137.013   6
  -2   3 -15 2953.35 728.207   6
  -2   3 -16 1764.52 559.463   6
   2  -2 -18 329.647 244.836   6
   2  -2 -17 1845.85 526.766   6
   2  -2 -16 388.174 300.656   6
   2  -2 -15 1006.67 362.543   6
   2  -2 -15 323.936 142.119   2
   2  -2 -14 4027.07 443.816   2
   2  -2 -14 3926.78 635.261   6
   2  -2 -13 1515.11 259.820   2
   2  -2 -13 1465.49 362.893   6
   2  -2 -12 837.534 185.117   2
   2  -2 -12 953.762 283.723   6
   2  -2 -11 1728.00 253.068   2
   2  -2 -11 1640.29 372.004   6
   2  -2 -10 3269.84 325.515   2
   2  -2 -10 3444.70 477.517   6
   2  -2  -9 636.833 212.027   6
   2  -2  -9 493.532 118.821   2
   2  -2  -8 4760.54 351.013   2
  -2   2   8 5676.26 320.622   3
   2  -2  -8 4993.70 518.962   6
  -2   2   7 335.064 91.4734   3
   2  -2  -7 357.666 149.598   6
   2  -2  -7 261.957 77.4603   2
   2  -2  -6 626.605 104.076   2
   2  -2  -6 774.161 179.271   6
   2  -2  -5 8651.50 596.529   6
   2  -2  -5 8871.58 418.558   2
   2  -2  -4 12010.2 479.348   2
  -2   2   4 13235.9 720.092   6
   2  -2  -4 10431.1 669.207   6
   2  -2  -3 643.239 176.653   6
  -2   2   3 1167.17 123.293   2
  -2   2   3 1349.32 242.112   6
  -2   2   2 1200.94 250.346   6
  -2   2   2 1796.95 152.351   2
   2  -2  -2 1786.48 194.227   4
   2  -2  -1 71.3800 53.3966   1
   2  -2  -1 118.336 68.7552   4
  -2   2   1 104.416 66.9972   4
   2  -2   0 4071.30 292.682   1
   2  -2   0 4352.96 408.973   4
  -2   2   0 5547.48 401.128   4
  -2   2   0 5140.22 338.905   1
   2  -2   1 11646.7 549.172   1
   2  -2   1 13258.3 892.744   4
  -2   2  -1 13508.5 800.606   4
  -2   2  -1 12020.6 579.621   1
  -2   2  -2 13674.9 643.699   1
   2  -2   2 12990.0 625.607   1
  -2   2  -2 13116.9 895.637   4
   2  -2   2 9940.58 917.124   4
   2  -2   3 17.8244 136.932   4
  -2   2  -3 60.4146 145.599   4
   2  -2   3 88.1539 77.0815   1
  -2   2  -4 6075.21 582.054   6
  -2   2  -4 6316.96 268.772   2
  -2   2  -4 2728.06 503.676   4
  -2   2  -5 12231.3 862.886   6
  -2   2  -5 10849.3 392.034   2
  -2   2  -6 1008.63 277.120   6
  -2   2  -6 907.974 92.3750   2
  -2   2  -7 1182.09 117.018   2
  -2   2  -7 1378.21 337.246   6
  -2   2  -8 2705.18 470.400   6
  -2   2  -8 2399.42 182.612   2
  -2   2  -9 366.108 197.245   6
  -2   2  -9 380.145 72.8442   2
  -2   2 -10 1404.03 374.990   6
  -2   2 -10 1353.01 157.689   2
  -2   2 -11 6306.32 385.311   2
  -2   2 -11 6592.71 862.761   6
  -2   2 -12 755.502 328.384   6
  -2   2 -12 556.816 132.786   2
  -2   2 -13 744.132 341.603   6
  -2   2 -14 2916.35 655.749   6
  -2   2 -15 1392.94 505.305   6
  -2   2 -16 601.808 358.751   6
   2  -1 -18 935.622 401.724   6
   2  -1 -17 266.815 249.400   6
   2  -1 -16 1630.25 471.104   6
   2  -1 -16 1201.92 266.423   2
   2  -1 -15 2780.62 569.225   6
   2  -1 -15 2331.81 345.574   2
   2  -1 -14-59.7302 85.0585   2
   2  -1 -14 56.3216 191.755   6
   2  -1 -13 6580.57 538.273   2
   2  -1 -13 6565.18 787.255   6
   2  -1 -12 9576.08 617.114   2
   2  -1 -12 10371.0 964.385   6
   2  -1 -11 1398.01 335.295   6
   2  -1 -11 1468.31 225.537   2
   2  -1 -10 313.093 165.136   6
   2  -1 -10 308.117 107.787   2
   2  -1 -10 139.477 23.7167   5
   2  -1  -9 5617.79 385.595   2
   2  -1  -9 5096.05 559.467   6
   2  -1  -8 1705.08 296.053   6
   2  -1  -8 1748.20 200.494   2
  -2   1   7 402.197 69.9041   3
   2  -1  -7 500.330 105.551   2
   2  -1  -7 585.866 172.943   6
   2  -1  -6 13562.8 781.781   6
   2  -1  -6 14850.0 578.685   2
  -2   1   6 17374.6 540.798   3
   2  -1  -5 4263.68 260.547   2
   2  -1  -5 4128.62 381.122   6
   2  -1  -4 1921.19 155.767   2
   2  -1  -4 2013.30 247.680   6
  -2   1   4 1998.26 150.133   2
  -2   1   4 2303.19 264.146   6
   2  -1  -3 51765.6 1284.90   2
  -2   1   3 56041.8 1280.30   2
   2  -1  -3 54623.1 1618.20   6
  -2   1   3 59236.5 1622.13   6
  -2   1   2 12633.3 649.508   6
   2  -1  -2 12824.7 416.243   2
  -2   1   2 13589.3 411.418   2
   2  -1  -1 206.653 64.5961   4
  -2   1   1 236.066 43.6231   2
   2  -1  -1 188.929 41.0479   2
   2  -1   0 6159.47 353.580   4
   2  -1   0 5356.29 315.569   1
  -2   1   0 5350.05 320.664   1
  -2   1   0 5884.59 214.062   2
  -2   1   0 6115.89 335.887   4
  -2   1  -1 47679.5 1309.72   1
  -2   1  -1 44990.8 1415.95   4
   2  -1   1 47603.0 1573.59   4
   2  -1   1 43729.9 1272.20   1
   2  -1   2 2437.78 389.468   4
  -2   1  -2 3039.65 362.496   4
  -2   1  -2 3854.03 323.667   1
   2  -1   2 3572.99 303.223   1
   2  -1   3 28926.2 1523.92   4
  -2   1  -3 37405.1 1187.08   1
  -2   1  -3 38963.1 762.334   2
   2  -1   3 39539.7 1214.28   1
  -2   1  -4 9020.17 660.239   6
  -2   1  -4 9454.27 266.739   2
  -2   1  -5 5935.04 215.722   2
  -2   1  -5 5897.21 550.470   6
   2  -1   6 1824.23 151.193   2
  -2   1  -6 2735.13 410.846   6
  -2   1  -6 2258.36 136.127   2
  -2   1  -7 19314.8 1161.24   6
   2  -1   7 13927.6 528.111   2
  -2   1  -7 17292.7 506.947   2
  -2   1  -8 2345.71 420.929   6
  -2   1  -8 2194.85 172.150   2
  -2   1  -9 2597.71 202.022   2
   2  -1   9 1590.63 84.6575   5
  -2   1  -9 3249.35 519.614   6
  -2   1 -10 6120.34 361.648   2
  -2   1 -10 7887.93 860.737   6
  -2   1 -11-89.7462 121.621   6
  -2   1 -11 88.5387 49.0198   2
  -2   1 -12 745.591 266.649   6
  -2   1 -12 673.403 129.796   2
  -2   1 -13 2560.02 559.717   6
  -2   1 -13 1901.75 249.281   2
  -2   1 -14 2522.38 599.336   6
  -2   1 -15 491.276 311.426   6
  -2   1 -16 1786.43 531.861   6
  -2   1 -17 332.071 260.605   6
   2   0 -18-23.1662 135.997   2
   2   0 -18 85.3297 237.898   6
   2   0 -17 844.729 238.891   2
   2   0 -17 782.921 349.887   6
   2   0 -16 1299.67 434.943   6
   2   0 -16 951.838 240.391   2
   2   0 -15 75.7895 216.554   6
   2   0 -15-141.665 117.106   2
   2   0 -14 1893.84 299.410   2
   2   0 -14 2044.37 462.348   6
   2   0 -13 3739.53 398.852   2
   2   0 -13 4636.57 657.530   6
   2   0 -12 536.214 236.044   6
   2   0 -12 48.1334 74.1129   2
   2   0 -11 372.843 114.380   2
   2   0 -11 493.172 199.816   6
   2   0 -10 2716.56 281.498   2
   2   0 -10 3092.08 460.286   6
   2   0  -9 1074.12 163.496   2
   2   0  -9 896.428 240.932   6
   2   0  -9 382.407 36.0128   5
   2   0  -8 2408.96 117.406   5
   2   0  -8 3209.78 262.344   2
   2   0  -8 3577.93 433.282   6
   2   0  -7 9709.38 468.862   2
   2   0  -7 9929.47 688.080   6
   2   0  -7 12133.3 354.901   5
   2   0  -6 1597.74 159.615   2
   2   0  -6 1702.40 258.302   6
  -2   0   5 7964.53 277.424   3
  -2   0   5 7876.01 530.609   6
   2   0  -5 7772.74 350.708   2
   2   0  -5 7633.95 506.168   6
   2   0  -4 16498.2 722.161   6
   2   0  -4 16954.3 530.768   2
  -2   0   4 16726.2 521.986   2
  -2   0   4 17861.7 746.937   6
   2   0  -3 10406.2 361.918   2
  -2   0   3 11382.6 517.234   6
  -2   0   3 10702.5 364.580   2
   2   0  -3 10761.2 509.757   6
  -2   0   2 1565.47 109.901   2
   2   0  -2 1457.42 105.940   2
   2   0  -2 1440.74 178.838   6
  -2   0   2 1592.26 172.303   6
   2   0  -1 23047.1 484.211   2
  -2   0   1 24905.4 499.011   2
   2   0   0 38.8291 16.7874   2
  -2   0   0 56.2461 20.0539   2
   2   0   0 25.7199 25.2051   4
   2   0   1 3733.07 269.376   1
  -2   0  -1 4520.27 229.984   4
   2   0   1 4291.77 282.812   4
  -2   0  -1 4171.69 278.426   1
   2   0   2 1586.31 231.436   4
  -2   0  -2 2360.58 248.585   4
  -2   0  -2 2897.83 249.026   1
   2   0   2 3068.21 252.469   1
   2   0   3 28697.0 955.259   1
  -2   0  -3 28978.0 966.269   1
  -2   0  -3 30159.2 1075.04   6
   2   0   4 5756.09 414.554   1
   2   0   4 4882.15 166.135   2
  -2   0  -4 3832.37 463.211   4
  -2   0  -4 5941.25 478.107   6
  -2   0  -4 5085.37 166.080   2
  -2   0  -4 5710.37 407.947   1
  -2   0  -5 6658.33 552.055   6
  -2   0  -5 5687.22 208.210   2
   2   0   5 4943.33 199.139   2
   2   0   6 3789.03 191.410   2
  -2   0  -6 4241.23 199.444   2
  -2   0  -6 5076.35 513.544   6
  -2   0  -7 3.35708 20.7918   2
   2   0   7 3.05317 16.5796   5
  -2   0  -7 184.618 112.205   6
   2   0   7 24.0133 29.2568   2
   2   0   8 2755.07 127.404   5
  -2   0  -8 3090.69 208.293   2
  -2   0  -8 3839.53 524.628   6
   2   0   8 2682.24 192.995   2
  -2   0  -9 5425.14 646.119   6
  -2   0  -9 4463.88 273.996   2
  -2   0 -10 119.896 51.6762   2
  -2   0 -10 145.147 147.851   6
  -2   0 -11 2413.96 492.760   6
  -2   0 -11 2347.90 239.985   2
  -2   0 -12 3721.31 623.458   6
  -2   0 -12 2712.62 274.667   2
  -2   0 -13-148.686 108.952   2
  -2   0 -13-8.81492 144.981   6
  -2   0 -13-109.786 107.612   3
  -2   0 -14 549.040 300.313   6
  -2   0 -15 3009.19 636.049   6
  -2   0 -16 987.769 430.079   6
  -2   0 -17 167.061 195.679   6
   2   1 -17 1168.76 446.999   6
   2   1 -17 1125.40 295.124   2
   2   1 -16 42.2485 76.8415   2
   2   1 -16 120.114 184.839   6
   2   1 -15 2703.60 576.588   6
   2   1 -15 2463.51 360.656   2
   2   1 -14 3604.58 622.652   6
   2   1 -14 3550.18 406.953   2
   2   1 -13 315.374 185.848   6
   2   1 -13 37.4390 60.1699   2
   2   1 -12 3124.74 533.473   6
   2   1 -12 3147.09 337.040   2
   2   1 -11 2243.48 265.837   2
   2   1 -11 2396.25 437.747   6
   2   1 -10 268.682 155.182   6
   2   1 -10 297.350 99.1437   2
   2   1  -9 4052.04 499.554   6
   2   1  -9 3554.36 297.108   2
   2   1  -8 8788.05 684.584   6
   2   1  -8 8168.72 417.515   2
   2   1  -7 3531.67 409.864   6
   2   1  -7 3500.14 257.893   2
   2   1  -7 2716.25 132.159   5
   2   1  -6 600.773 62.4665   5
   2   1  -6 914.390 199.623   6
   2   1  -6 780.499 115.574   2
   2   1  -5 12180.9 648.033   6
  -2  -1   5 11476.3 650.323   6
   2   1  -5 10175.8 312.415   5
   2   1  -5 11325.2 442.056   2
  -2  -1   4 477.813 123.677   6
   2   1  -4 411.949 72.9369   2
   2   1  -4 456.516 132.005   6
   2   1  -4 379.263 52.2060   5
  -2  -1   3 3183.80 257.802   6
   2   1  -3 3708.00 267.569   6
   2   1  -3 3536.68 195.651   2
  -2  -1   3 3135.82 214.144   2
   2   1  -3 4184.56 179.960   5
   2   1  -2 18580.6 490.759   2
   2   1  -2 17467.8 564.415   6
  -2  -1   2 17692.8 559.932   6
  -2  -1   2 15806.4 518.584   2
   2   1  -1 1948.22 153.637   6
  -2  -1   1 2149.03 143.050   2
  -2  -1   1 2267.12 135.219   6
   2   1  -1 2090.49 126.479   2
  -2  -1   0 4670.57 195.476   2
   2   1   0 4212.22 180.517   2
  -2  -1  -1 5586.98 275.198   6
   2   1   1 5773.52 197.244   2
   2   1   1 5532.11 314.068   1
   2   1   2 3324.25 260.275   6
  -2  -1  -2 3576.96 254.603   6
   2   1   2 3760.69 271.947   1
  -2  -1  -2 3575.09 260.954   1
   2   1   3 993.531 153.872   6
   2   1   3 1318.19 92.4483   5
   2   1   3 1275.75 168.253   1
  -2  -1  -3 1062.20 147.996   1
  -2  -1  -3 1160.51 168.580   6
  -2  -1  -4 26284.2 1047.03   6
   2   1   4 22132.1 592.894   2
   2   1   4 32414.2 704.160   5
  -2  -1  -4 25849.0 950.252   1
   2   1   4 24098.1 942.018   1
   2   1   4 22791.0 996.124   6
   2   1   5 951.906 77.0111   5
  -2  -1  -5 1133.47 232.776   6
   2   1   5 826.737 63.1351   2
  -2  -1  -5 893.946 181.313   1
  -2  -1  -6 2416.08 347.293   6
   2   1   6 1856.31 111.159   2
   2   1   6 2148.72 118.357   5
   2   1   7 7696.40 255.039   5
   2   1   7 7271.52 268.258   2
  -2  -1  -7 8591.79 700.249   6
  -2  -1  -8 4654.04 547.153   6
  -2  -1  -8 4079.58 261.309   2
   2   1   8 4458.94 215.391   2
   2   1   8 4055.58 168.593   5
  -2  -1  -9 362.675 184.186   6
  -2  -1  -9 226.127 60.0040   2
  -2  -1 -10 5039.75 637.482   6
  -2  -1 -11 7677.72 828.250   6
  -2  -1 -12 592.866 226.975   6
  -2  -1 -12 449.983 108.917   3
  -2  -1 -13 2563.38 518.548   6
  -2  -1 -13 2305.68 273.526   3
  -2  -1 -14 3528.47 629.542   6
  -2  -1 -15 408.151 295.186   6
  -2  -1 -16 1011.23 379.284   6
  -2  -1 -17 2102.36 592.481   6
   2   2 -17 597.140 350.758   6
   2   2 -17 88.6972 99.8898   2
   2   2 -16 1694.22 328.002   2
   2   2 -16 1873.31 548.959   6
   2   2 -15 2252.67 346.463   2
   2   2 -15 3051.25 632.639   6
   2   2 -14 459.359 149.252   2
   2   2 -14 368.101 242.394   6
   2   2 -13 2423.94 530.206   6
   2   2 -13 2371.18 312.665   2
   2   2 -12 2411.25 294.850   2
   2   2 -12 3512.72 583.067   6
   2   2 -11 111.854 144.867   6
   2   2 -11 56.6285 65.0727   2
   2   2 -10 2314.59 253.752   2
   2   2 -10 2370.64 406.588   6
   2   2  -9 3944.26 502.514   6
   2   2  -9 3228.89 286.379   2
   2   2  -8 72.9535 40.9857   2
   2   2  -8 36.9366 121.867   6
   2   2  -7 133.833 50.1981   2
   2   2  -7 294.006 54.8071   5
   2   2  -7 330.733 159.385   6
   2   2  -6 1227.66 95.9559   5
   2   2  -6 1579.24 168.444   2
   2   2  -6 1698.42 275.916   6
   2   2  -5 603.200 137.588   6
   2   2  -5 508.273 86.2708   2
   2   2  -5 530.888 60.0947   5
   2   2  -4 15775.0 459.499   5
   2   2  -4 18406.5 773.899   6
  -2  -2   4 15580.3 721.543   6
   2   2  -4 19547.7 595.985   2
  -2  -2   3 19473.2 654.617   2
  -2  -2   3 19011.0 709.192   6
   2   2  -3 21324.0 740.110   6
   2   2  -3 18587.6 624.771   2
   2   2  -3 19088.2 517.559   5
   2   2  -2 4233.74 249.855   2
  -2  -2   2 4008.21 240.235   6
   2   2  -2 3899.52 186.576   5
  -2  -2   2 5389.73 221.987   5
   2   2  -2 4583.61 250.221   6
  -2  -2   2 3980.35 248.764   2
  -2  -2   1 5054.38 273.379   2
  -2  -2   1 6683.94 250.538   5
   2   2  -1 5443.91 268.544   2
   2   2  -1 5081.48 213.166   5
  -2  -2   0 273.015 47.5196   5
   2   2   0 125.646 44.3501   2
   2   2   0 220.008 42.5817   5
   2   2   1 7626.81 269.143   5
   2   2   1 4586.38 334.135   4
   2   2   1 7869.01 275.194   6
  -2  -2  -1 8767.99 287.926   5
   2   2   2 94.8759 56.5851   1
  -2  -2  -2 100.748 52.8458   6
   2   2   2 118.274 37.9694   5
  -2  -2  -2 93.7907 34.7519   5
   2   2   2 123.750 54.7554   6
   2   2   3 14404.5 636.356   6
  -2  -2  -3 18490.4 486.503   5
   2   2   3 15551.8 627.863   1
  -2  -2  -3 14679.0 631.364   6
  -2  -2  -3 15177.8 608.740   1
   2   2   3 15378.6 448.644   5
   2   2   4 8874.79 537.472   6
  -2  -2  -4 10908.3 346.032   5
   2   2   4 9360.21 322.727   5
  -2  -2  -4 9093.67 538.880   6
  -2  -2  -4 9234.71 486.407   1
   2   2   4 9799.79 498.127   1
  -2  -2  -5 6500.87 489.105   6
   2   2   5 5494.46 238.932   2
   2   2   5 5868.61 232.959   5
   2   2   5 5950.81 411.242   1
  -2  -2  -5 6043.66 405.929   1
  -2  -2  -6 15852.4 859.700   6
   2   2   6 13778.1 431.147   2
   2   2   6 14707.8 422.617   5
   2   2   7 8193.90 284.025   5
  -2  -2  -7 9356.18 688.169   6
   2   2   7 7807.93 298.685   2
  -2  -2  -8 287.662 150.426   6
   2   2   8 321.484 56.3780   5
  -2  -2  -9 2446.81 406.071   6
  -2  -2 -10 2323.31 409.839   6
  -2  -2 -10 1959.46 226.760   3
  -2  -2 -11 261.455 169.328   6
  -2  -2 -11-57.7981 86.9791   3
  -2  -2 -12 1879.28 254.118   3
  -2  -2 -12 2089.93 472.435   6
  -2  -2 -13 2245.25 295.438   3
  -2  -2 -13 2587.54 521.690   6
  -2  -2 -14 31.0183 76.1010   3
  -2  -2 -14 383.780 247.801   6
  -2  -2 -15 3250.67 643.053   6
  -2  -2 -16 2089.17 531.258   6
  -2  -2 -17 284.454 268.494   6
  -2  -2 -18 886.009 397.161   6
   2   3 -17 1267.11 525.768   6
   2   3 -16 1143.07 279.541   2
   2   3 -16 1614.81 498.791   6
   2   3 -15 352.251 200.220   2
   2   3 -15 356.239 270.073   6
   2   3 -14 2436.16 546.518   6
   2   3 -14 2156.17 324.295   2
   2   3 -13 1709.23 441.902   6
   2   3 -13 1569.13 259.391   2
   2   3 -12 915.414 337.944   6
   2   3 -12 799.111 168.073   2
   2   3 -11 4821.43 395.890   2
   2   3 -11 5664.73 705.372   6
   2   3 -10 4954.68 638.520   6
   2   3 -10 5111.15 391.161   2
   2   3  -9 14.0988 54.3645   2
   2   3  -9 32.2693 122.034   6
   2   3  -8 6755.55 654.879   6
   2   3  -8 6019.31 391.477   2
   2   3  -7 279.970 79.1481   2
   2   3  -7 227.644 140.151   6
   2   3  -6 301.944 144.320   6
   2   3  -6 541.761 112.249   2
   2   3  -5 5962.61 361.389   2
  -2  -3   5 8656.64 314.106   5
   2   3  -5 5249.94 242.887   5
   2   3  -5 6977.02 541.355   6
   2   3  -4 12019.5 409.584   5
  -2  -3   4 15935.5 451.086   5
   2   3  -4 13658.4 576.482   2
  -2  -3   4 12091.7 660.693   6
   2   3  -4 15085.0 732.026   6
   2   3  -3 505.218 118.537   6
   2   3  -3 302.907 75.2571   2
   2   3  -3 251.434 49.8906   5
  -2  -3   3 328.139 56.1886   5
   2   3  -2 18649.6 639.592   2
  -2  -3   2 17275.6 498.561   5
   2   3  -2 14757.4 473.508   5
   2   3  -2 17346.1 614.527   6
   2   3  -1 1509.16 117.434   5
   2   3  -1 1796.94 175.091   2
   2   3  -1 935.072 242.694   4
  -2  -3   1 1759.70 133.772   3
  -2  -3   1 1935.56 138.220   5
   2   3  -1 1895.02 146.568   6
   2   3   0 2538.15 154.294   5
  -2  -3   0 3177.76 176.322   5
  -2  -3   0 2857.13 177.402   3
   2   3   0 860.018 239.821   4
   2   3   1 12211.8 385.892   5
  -2  -3  -1 10087.8 416.147   6
  -2  -3  -1 13090.8 431.922   3
   2   3   1 10455.1 655.431   4
  -2  -3  -1 13932.6 419.115   5
   2   3   1 13108.6 397.326   6
   2   3   2 39011.6 1002.28   6
  -2  -3  -2 39049.1 910.002   5
  -2  -3  -2 34940.5 961.551   6
   2   3   2 42451.2 1114.69   4
  -2  -3  -2 36808.0 961.465   3
   2   3   2 34236.5 875.224   5
  -2  -3  -2 31978.5 1149.02   4
   2   3   3 20801.4 775.827   6
   2   3   3 22606.7 760.305   1
  -2  -3  -3 20208.3 734.112   6
  -2  -3  -3 21675.9 602.618   5
  -2  -3  -3 26349.9 711.931   4
   2   3   3 19695.3 578.777   5
  -2  -3  -4 1456.75 119.840   5
  -2  -3  -4 1651.18 178.154   1
   2   3   4 1544.10 176.698   1
   2   3   4 1373.28 112.032   5
   2   3   4 1535.55 222.223   6
  -2  -3  -4 1601.29 210.629   6
  -2  -3  -4 1458.93 133.153   4
  -2  -3  -5 11833.4 561.046   1
  -2  -3  -5 11450.0 383.342   5
   2   3   5 12029.1 571.147   1
  -2  -3  -5 12099.5 659.374   6
   2   3   5 12014.6 392.290   5
  -2  -3  -6 271.071 124.035   6
  -2  -3  -6 191.371 41.9979   5
  -2  -3  -6 118.709 76.2712   1
   2   3   6 230.271 58.6694   5
  -2  -3  -7 7620.05 602.051   6
  -2  -3  -7 7740.82 423.832   3
   2   3   7 7047.46 330.211   2
   2   3   7 7584.46 297.159   5
  -2  -3  -7 8036.41 300.878   5
  -2  -3  -8 18097.1 732.112   3
  -2  -3  -8 17618.6 1008.82   6
  -2  -3  -9 7382.63 675.011   6
  -2  -3  -9 7036.55 449.401   3
  -2  -3 -10 130.139 139.286   6
  -2  -3 -10 40.6359 50.8168   3
  -2  -3 -11 4234.72 371.542   3
  -2  -3 -11 4265.90 566.640   6
  -2  -3 -12 1000.05 195.569   3
  -2  -3 -12 936.139 291.152   6
  -2  -3 -13 121.831 80.1870   3
  -2  -3 -13 171.482 117.459   6
  -2  -3 -14 4753.98 696.935   6
  -2  -3 -14 4925.78 457.434   3
  -2  -3 -15 5545.80 806.960   6
  -2  -3 -16-117.386 165.112   6
  -2  -3 -17 2567.33 595.817   6
  -2  -3 -18 1423.13 508.225   6
   2   4 -17 234.638 288.877   6
   2   4 -16 117.541 497.629   6
   2   4 -16 176.865 115.836   2
   2   4 -15 1518.42 530.279   6
   2   4 -15 1158.90 271.861   2
   2   4 -14 1261.44 251.502   2
   2   4 -14 1809.32 484.616   6
   2   4 -13 193.338 111.528   2
   2   4 -13 58.3309 179.968   6
   2   4 -12 3009.57 561.647   6
   2   4 -12 2341.26 301.552   2
   2   4 -11 702.400 162.222   2
   2   4 -11 936.829 325.951   6
   2   4 -10 354.540 173.090   6
   2   4 -10 523.973 123.779   2
   2   4  -9 3481.09 318.548   2
   2   4  -9 3798.45 535.050   6
   2   4  -8 4719.05 575.488   6
   2   4  -8 4767.09 355.509   2
   2   4  -7 117.231 111.407   6
   2   4  -7 40.6838 43.2479   2
   2   4  -6 2837.71 266.240   2
  -2  -4   6 3418.82 199.779   5
   2   4  -6 3514.47 436.980   6
   2   4  -5 4263.35 343.184   2
   2   4  -5 4815.32 465.186   6
  -2  -4   5 4470.29 233.877   5
   2   4  -4 66.2936 38.0505   2
   2   4  -4 15.6404 20.9108   3
  -2  -4   4 88.4523 46.0297   5
   2   4  -4 65.6433 97.6354   6
  -2  -4   3 1731.23 146.172   5
   2   4  -3 1565.24 225.341   6
   2   4  -3 1553.15 120.513   3
   2   4  -3 1274.02 122.593   5
   2   4  -3 1567.58 195.407   2
   2   4  -2 4144.27 230.492   5
   2   4  -2 4804.67 359.839   6
   2   4  -2 5412.78 364.808   2
   2   4  -2 5395.56 254.216   3
  -2  -4   2 5527.07 275.986   5
   2   4  -1 4276.61 235.114   3
   2   4  -1 3780.75 213.598   5
  -2  -4   1 4438.20 240.932   5
   2   4  -1 1271.05 374.496   4
  -2  -4   0 21919.1 673.653   3
   2   4   0 19520.3 590.894   5
  -2  -4   0 12995.3 1053.91   4
   2   4   0 10713.4 956.598   4
  -2  -4   0 22830.4 638.665   5
   2   4   0 22412.2 658.804   3
  -2  -4  -1 3154.16 197.344   5
  -2  -4  -1 3285.98 233.134   3
  -2  -4  -1 1965.20 357.922   4
   2   4   1 2894.95 184.493   5
   2   4   1 2771.89 383.288   4
   2   4   1 3262.82 249.836   6
   2   4   1 3120.68 215.168   3
   2   4   2 1412.34 129.305   5
  -2  -4  -2 1220.86 177.843   6
  -2  -4  -2 1441.10 153.999   3
  -2  -4  -2 1233.47 242.985   4
  -2  -4  -2 1492.56 131.551   5
   2   4   2 1458.29 170.038   6
   2   4   2 1727.46 250.764   4
  -2  -4  -3 7399.07 323.943   5
   2   4   3 6662.06 297.576   5
   2   4   3 9006.10 438.614   4
  -2  -4  -3 8236.33 533.288   4
   2   4   3 8076.51 384.956   1
   2   4   3 7269.17 424.916   6
  -2  -4  -3 7001.79 374.269   3
  -2  -4  -3 7148.75 415.148   6
   2   4   4 5484.10 336.255   1
  -2  -4  -4 4842.86 370.083   6
  -2  -4  -4 5310.66 329.595   3
   2   4   4 5769.29 411.167   6
   2   4   4 5156.88 254.836   5
  -2  -4  -4 5714.89 346.915   4
  -2  -4  -4 5491.96 268.482   5
  -2  -4  -5 1778.51 190.655   1
  -2  -4  -5 1649.06 145.065   5
   2   4   5 1650.32 142.026   5
  -2  -4  -5 1536.24 224.066   6
  -2  -4  -5 1662.18 175.562   4
   2   4   5 1647.40 190.064   1
  -2  -4  -5 1363.80 173.749   3
  -2  -4  -6 4043.71 281.918   4
  -2  -4  -6 3608.90 290.726   3
  -2  -4  -6 3731.80 218.248   5
   2   4   6 3727.90 213.050   5
  -2  -4  -6 3682.16 373.654   6
  -2  -4  -6 3507.59 293.133   1
  -2  -4  -7 20869.5 852.495   1
  -2  -4  -7 21848.6 638.214   5
  -2  -4  -7 22387.7 839.452   3
  -2  -4  -7 20937.8 1029.55   6
  -2  -4  -8 1362.73 198.901   3
  -2  -4  -8 1256.22 118.734   5
  -2  -4  -8 1453.82 288.563   6
  -2  -4  -9 1144.91 109.927   5
  -2  -4  -9 1282.11 199.790   3
  -2  -4  -9 1114.18 253.586   6
  -2  -4 -10 2952.97 186.919   5
  -2  -4 -10 2475.45 288.570   3
  -2  -4 -10 2334.83 385.901   6
  -2  -4 -11 1643.11 357.365   6
  -2  -4 -11 1537.92 235.768   3
  -2  -4 -12 27.5605 81.4061   6
  -2  -4 -12 156.787 91.8211   3
  -2  -4 -13 1131.54 341.102   6
  -2  -4 -13 1062.00 214.464   3
  -2  -4 -14 1680.84 285.969   3
  -2  -4 -14 1545.56 385.020   6
  -2  -4 -15-56.4698 131.391   6
  -2  -4 -15 251.785 163.833   3
  -2  -4 -16 1873.19 474.576   6
  -2  -4 -17 694.677 332.981   6
  -2  -4 -18 135.408 217.627   6
   2   5 -16 2067.80 591.871   6
   2   5 -15 251.996 256.784   6
   2   5 -15 398.094 162.126   2
   2   5 -14 476.524 157.894   2
   2   5 -14 675.543 308.215   6
   2   5 -13 3926.47 417.461   2
   2   5 -13 3941.54 689.149   6
   2   5 -12 418.403 135.438   2
   2   5 -12 317.086 227.578   6
   2   5 -11 2736.81 519.320   6
   2   5 -11 2247.14 286.549   2
   2   5 -10 5753.12 451.528   2
   2   5 -10 5467.58 726.477   6
   2   5  -9 9720.42 929.934   6
   2   5  -9 9569.76 562.262   2
   2   5  -8 248.245 102.048   2
   2   5  -8 361.449 163.081   6
   2   5  -7 8114.01 735.731   6
   2   5  -7 7040.79 474.183   2
  -2  -5   7 7994.45 350.285   5
  -2  -5   6 8539.24 356.832   5
   2   5  -6 9956.22 762.461   6
   2   5  -6 6105.60 248.494   3
   2   5  -6 8381.11 526.310   2
   2   5  -5 1096.96 197.547   2
  -2  -5   5 1075.81 127.974   5
   2   5  -5 1281.78 265.601   6
   2   5  -5 958.722 100.361   3
  -2  -5   4 17272.9 596.807   5
   2   5  -4 16599.5 899.165   6
   2   5  -4 17929.6 559.198   3
   2   5  -4 17481.2 774.962   2
   2   5  -3 8039.46 357.934   3
   2   5  -3 8135.22 496.432   2
  -2  -5   3 7631.51 361.138   5
   2   5  -3 7578.57 543.374   6
   2   5  -2 80.3270 49.8121   2
  -2  -5   2 75.1355 33.4078   5
   2   5  -2 145.062 64.1290   3
  -2  -5   1 7715.83 361.322   5
   2   5  -1 7488.42 381.349   3
   2   5   0 15805.6 599.771   3
  -2  -5   0 16196.2 557.896   5
  -2  -5   0 13160.8 1145.38   4
   2   5   0 9547.47 951.105   4
   2   5   1 5165.42 598.835   4
  -2  -5  -1 5749.88 301.911   5
  -2  -5  -1 3570.63 568.504   4
   2   5   1 3561.32 361.768   6
   2   5   1 5879.94 345.286   3
   2   5   2 26073.8 929.195   6
   2   5   2 27072.7 1259.95   4
  -2  -5  -2 18120.5 1218.65   4
  -2  -5  -2 25305.6 750.884   5
  -2  -5  -2 23272.6 813.949   3
   2   5   3 13290.7 651.536   6
  -2  -5  -3 12931.5 567.824   3
  -2  -5  -3 12746.2 840.819   4
   2   5   3 17126.7 779.576   4
  -2  -5  -3 13185.8 498.845   5
  -2  -5  -3 10282.1 616.482   6
  -2  -5  -4 11693.7 559.960   3
   2   5   4 13062.1 516.510   1
   2   5   4 12497.7 669.308   6
  -2  -5  -4 12344.3 476.755   5
  -2  -5  -4 10906.9 616.230   6
  -2  -5  -4 11649.4 693.757   4
   2   5   4 14267.3 628.762   4
  -2  -5  -5 736.365 102.550   5
  -2  -5  -5 676.814 136.928   3
   2   5   5 857.781 122.314   1
  -2  -5  -5 797.584 150.987   4
  -2  -5  -5 696.534 147.979   6
  -2  -5  -6 11156.9 495.694   1
  -2  -5  -6 11300.3 568.223   3
  -2  -5  -6 11554.9 450.204   5
  -2  -5  -6 10855.7 673.735   6
  -2  -5  -6 11194.5 565.570   4
   2   5   6 10744.3 506.013   1
  -2  -5  -7 13752.4 654.289   4
  -2  -5  -7 15840.1 549.728   5
  -2  -5  -7 15436.7 706.186   3
  -2  -5  -7 14569.3 641.558   1
  -2  -5  -7 14676.9 842.736   6
  -2  -5  -8 1217.30 250.423   6
  -2  -5  -8 1143.13 185.958   3
  -2  -5  -8 1385.46 195.719   4
  -2  -5  -8 1150.56 180.777   1
  -2  -5  -8 1304.54 137.449   5
  -2  -5  -9 5895.06 302.837   5
  -2  -5  -9 5705.96 439.828   3
  -2  -5  -9 5512.19 563.287   6
  -2  -5 -10 576.261 160.186   3
  -2  -5 -10 205.006 55.0051   5
  -2  -5 -10 177.083 138.645   6
  -2  -5 -11 62.8292 25.4957   5
  -2  -5 -11 234.994 130.257   3
  -2  -5 -11 81.4037 129.169   6
  -2  -5 -12 969.276 226.077   3
  -2  -5 -12 572.999 227.407   6
  -2  -5 -13 2184.99 319.718   3
  -2  -5 -13 1805.57 396.204   6
  -2  -5 -14 449.274 192.133   3
  -2  -5 -14 5.30098 101.386   6
  -2  -5 -15 2785.31 543.355   6
  -2  -5 -16 1740.27 454.371   6
  -2  -5 -17-114.249 175.620   6
  -2  -5 -18 825.964 334.284   6
   2   6 -15 1178.43 438.453   6
   2   6 -15 1405.66 297.642   2
   2   6 -14 2211.15 342.209   2
   2   6 -14 2359.09 604.018   6
   2   6 -13 1015.70 396.482   6
   2   6 -13 752.162 207.238   2
   2   6 -12 1025.14 357.653   6
   2   6 -12 1055.14 221.096   2
   2   6 -11 4730.78 721.139   6
   2   6 -11 4047.44 406.623   2
   2   6 -10 156.679 84.1020   2
   2   6 -10 59.8237 117.394   6
   2   6  -9 916.046 175.149   2
   2   6  -9 878.209 325.975   6
  -2  -6   8 5555.10 311.062   5
   2   6  -8 5822.78 450.277   2
   2   6  -8 5446.58 677.266   6
   2   6  -7 6475.72 691.658   6
  -2  -6   7 6397.61 337.861   5
   2   6  -7 6442.34 499.787   2
  -2  -6   6 948.857 128.333   5
   2   6  -6 892.521 112.405   3
   2   6  -6 1075.11 205.453   2
   2   6  -6 1364.64 306.124   6
   2   6  -5 3201.18 226.687   3
  -2  -6   5 3061.56 237.086   5
   2   6  -5 3171.14 336.143   2
   2   6  -5 3089.25 420.959   6
   2   6  -4 3378.31 340.711   2
   2   6  -4 3401.23 245.534   3
  -2  -6   4 2966.14 232.711   5
   2   6  -4 3318.68 418.838   6
   2   6  -3 1904.54 193.343   3
   2   6  -3 1661.76 277.009   6
   2   6  -3 1698.21 237.986   2
  -2  -6   3 1354.17 154.082   5
   2   6  -2 8508.35 438.790   3
  -2  -6   2 7977.21 398.077   5
   2   6  -1 4765.74 330.798   3
  -2  -6   1 2744.41 620.325   4
  -2  -6   1 4608.51 292.387   5
  -2  -6   0 4249.23 279.700   5
  -2  -6   0 1569.30 474.643   4
  -2  -6  -1 8617.43 1013.28   4
  -2  -6  -1 15447.6 580.659   5
  -2  -6  -2 6464.87 353.587   5
  -2  -6  -2 5508.34 726.030   4
   2   6   2 6814.00 683.919   4
   2   6   2 6350.21 514.374   6
  -2  -6  -3 124.688 65.0110   5
   2   6   3 114.941 99.4476   6
  -2  -6  -3 90.8381 125.522   4
   2   6   3 178.781 109.945   4
  -2  -6  -4 3581.68 318.999   3
   2   6   4 3953.91 264.156   1
  -2  -6  -4 3796.31 263.726   5
  -2  -6  -4 2811.20 352.701   6
  -2  -6  -4 3761.67 474.526   4
   2   6   4 4202.79 397.873   4
  -2  -6  -5 13275.4 648.397   3
  -2  -6  -5 14343.2 559.316   5
  -2  -6  -5 12247.3 762.735   4
  -2  -6  -5 12272.6 731.551   6
   2   6   5 15090.5 715.371   4
   2   6   5 14530.0 534.501   1
  -2  -6  -6 1555.80 233.914   4
   2   6   6 1280.87 147.331   1
  -2  -6  -6 1505.72 162.747   5
  -2  -6  -6 1220.86 234.659   6
  -2  -6  -6 1528.65 217.242   3
  -2  -6  -7 5672.38 421.230   3
  -2  -6  -7 4759.23 303.204   1
  -2  -6  -7 5358.41 315.448   5
  -2  -6  -7 4884.12 484.327   6
  -2  -6  -7 5256.48 425.248   4
  -2  -6  -8 4989.57 300.994   5
  -2  -6  -8 5281.50 419.005   3
  -2  -6  -8 4860.38 408.961   4
  -2  -6  -8 4564.90 333.462   1
  -2  -6  -8 4487.69 492.773   6
  -2  -6  -9 221.618 80.3799   4
  -2  -6  -9 159.940 72.9307   1
  -2  -6  -9 328.711 75.3989   5
  -2  -6  -9 287.167 146.691   6
  -2  -6  -9 404.722 148.492   3
  -2  -6 -10 3377.45 358.282   4
  -2  -6 -10 4038.32 269.581   5
  -2  -6 -10 4146.96 402.581   3
  -2  -6 -10 3437.02 475.393   6
  -2  -6 -11 7277.25 551.772   3
  -2  -6 -11 6444.65 339.921   5
  -2  -6 -11 6028.85 671.189   6
  -2  -6 -12 800.434 109.546   5
  -2  -6 -12 1628.90 299.242   3
  -2  -6 -12 899.622 285.410   6
  -2  -6 -13 468.295 213.433   6
  -2  -6 -14 3985.86 614.693   6
  -2  -6 -15 1149.76 359.253   6
  -2  -6 -16 932.421 348.831   6
  -2  -6 -17 2517.03 576.983   6
  -2  -6 -18 1170.33 418.454   6
   2   7 -14 85.3013 88.0574   2
   2   7 -13 1833.43 517.042   6
   2   7 -13 1406.72 276.037   2
   2   7 -12 4513.25 754.282   6
   2   7 -12 3641.97 417.615   2
   2   7 -11 771.635 322.831   6
   2   7 -11 875.075 205.991   2
   2   7 -10 1155.04 427.628   6
   2   7 -10 1457.09 239.994   2
   2   7  -9 1038.22 201.992   2
   2   7  -9 1306.43 397.733   6
   2   7  -8 4.93774 146.636   6
   2   7  -8 6.34545 70.0299   2
  -2  -7   8 108.289 53.6921   5
   2   7  -7 462.251 231.711   6
  -2  -7   7 364.331 91.0255   5
   2   7  -7 639.817 177.640   2
  -2  -7   6 714.983 121.699   5
   2   7  -6 767.546 182.919   2
   2   7  -6 778.321 249.372   6
   2   7  -5 2027.45 281.105   2
   2   7  -5 1804.44 354.075   6
   2   7  -5 1940.62 209.168   3
  -2  -7   5 1795.75 195.258   5
  -2  -7   4 485.982 89.5945   5
   2   7  -4 656.861 192.422   6
   2   7  -4 633.128 152.309   2
  -2  -7   3 2316.42 217.401   5
   2   7  -3 2538.57 324.467   2
  -2  -7   2 4185.68 297.411   5
  -2  -7   1 7137.63 1088.55   4
  -2  -7   1 11801.7 534.547   5
  -2  -7   0 15592.0 632.735   5
  -2  -7  -1 2239.73 222.572   5
  -2  -7  -1 1399.75 449.666   4
  -2  -7  -2 378.130 99.1421   5
  -2  -7  -2 76.5195 181.059   4
   2   7   2 201.617 151.722   6
  -2  -7  -3 6633.65 814.265   4
  -2  -7  -3 7565.53 419.560   5
  -2  -7  -4 5964.58 357.227   5
  -2  -7  -4 5336.20 656.536   4
   2   7   5 75.2946 51.9696   1
  -2  -7  -5 45.7765 128.998   6
  -2  -7  -5 3.58415 37.1996   5
  -2  -7  -5 58.4060 94.9472   4
  -2  -7  -6 12796.6 547.815   5
  -2  -7  -6 11575.3 789.747   4
  -2  -7  -6 11369.3 773.961   6
   2   7   6 10903.2 429.687   1
  -2  -7  -7 8378.69 669.587   6
  -2  -7  -7 9898.61 478.423   5
  -2  -7  -7 9188.34 638.188   4
  -2  -7  -8 38.7815 38.3584   4
  -2  -7  -8 22.5811 43.3285   5
  -2  -7  -8 161.724 63.9897   1
  -2  -7  -8 211.939 137.372   6
  -2  -7  -9 6122.08 505.932   4
  -2  -7  -9 6883.04 383.561   5
  -2  -7  -9 5657.12 369.428   1
  -2  -7  -9 6014.45 611.199   6
  -2  -7 -10 4736.29 376.185   1
  -2  -7 -10 5412.81 599.387   6
  -2  -7 -10 5377.20 480.093   4
  -2  -7 -10 5952.47 353.532   5
  -2  -7 -11 1016.45 218.391   4
  -2  -7 -11 1166.67 148.974   5
  -2  -7 -11 1135.86 285.824   6
  -2  -7 -12 4315.09 597.905   6
  -2  -7 -12 3665.49 426.017   4
  -2  -7 -12 5024.41 318.943   5
  -2  -7 -13 5290.83 525.259   4
  -2  -7 -13 5741.97 327.964   5
  -2  -7 -13 5283.47 691.229   6
  -2  -7 -14 563.437 171.393   4
  -2  -7 -14 547.707 258.698   6
  -2  -7 -15 795.688 225.222   4
  -2  -7 -15 722.023 278.977   6
  -2  -7 -16 1663.91 321.190   4
  -2  -7 -16 2087.65 515.250   6
  -2  -7 -17 546.879 281.192   6
  -2  -7 -17 623.959 225.640   4
  -2  -7 -18 330.548 197.969   4
  -2  -7 -18 22.6050 146.067   6
   2   8 -14 419.242 147.586   2
   2   8 -13 1382.06 285.930   2
   2   8 -12 587.662 319.244   6
   2   8 -12 499.825 174.890   2
   2   8 -11 563.070 296.041   6
   2   8 -11 1193.31 238.219   2
   2   8 -10 2963.96 626.138   6
   2   8 -10 3182.08 376.686   2
   2   8  -9 159.007 195.419   6
   2   8  -9 16.5043 76.1630   2
   2   8  -8 1843.24 446.114   6
   2   8  -8 2022.67 318.803   2
  -2  -8   7 5867.68 384.242   5
   2   8  -7 5960.34 545.997   2
   2   8  -7 6037.87 744.954   6
  -2  -8   6 1171.38 172.442   5
   2   8  -6 1158.35 319.863   6
   2   8  -6 1468.65 269.573   2
  -2  -8   5 199.599 48.5753   5
   2   8  -5 411.499 147.097   2
   2   8  -5 181.376 133.163   6
   2   8  -4 2347.41 407.434   6
  -2  -8   4 2018.50 216.621   5
   2   8  -4 2386.05 332.430   2
   2   8  -3 705.331 179.721   2
  -2  -8   3 389.288 84.2661   5
  -2  -8   2 824.168 140.291   5
  -2  -8   1 6660.57 417.649   5
  -2  -8   1 3861.91 892.851   4
  -2  -8   0 19612.6 768.330   5
  -2  -8  -1 7190.08 430.921   5
  -2  -8  -1 3787.98 815.587   4
  -2  -8  -2 4245.80 790.865   4
  -2  -8  -2 5956.60 398.949   5
  -2  -8  -3 3016.32 592.243   4
  -2  -8  -3 3565.95 303.783   5
  -2  -8  -4 489.322 243.461   4
  -2  -8  -4 286.702 97.3031   5
   2   8   5 5494.34 307.698   1
  -2  -8  -5 6431.37 398.899   5
  -2  -8  -5 5379.35 702.250   4
  -2  -8  -6 13014.8 582.683   5
  -2  -8  -6 8956.90 760.907   6
   2   8   6 10261.1 378.682   1
  -2  -8  -6 11597.0 926.109   4
  -2  -8  -7 20.2814 57.2190   4
  -2  -8  -7 61.7095 103.280   6
  -2  -8  -7-4.88569 45.0636   5
  -2  -8  -8 7392.93 436.421   5
  -2  -8  -8 6362.44 630.042   6
  -2  -8  -8 6917.63 596.265   4
  -2  -8  -9 1801.60 337.951   6
  -2  -8  -9 1854.87 208.174   5
  -2  -8  -9 1444.43 264.449   4
  -2  -8 -10 118.068 103.983   4
  -2  -8 -10 101.207 55.7580   1
  -2  -8 -10 23.6305 82.0836   5
  -2  -8 -10 135.834 127.875   6
  -2  -8 -11 1325.75 177.654   5
  -2  -8 -11 1401.52 313.065   6
  -2  -8 -11 1234.38 253.587   4
  -2  -8 -12 3347.97 521.435   6
  -2  -8 -12 2876.14 384.713   4
  -2  -8 -12 3761.78 299.276   5
  -2  -8 -13 284.703 152.811   6
  -2  -8 -13 701.354 130.048   5
  -2  -8 -13 700.162 214.203   4
  -2  -8 -14 757.127 216.047   4
  -2  -8 -14 630.530 232.579   6
  -2  -8 -15 1337.66 295.121   4
  -2  -8 -15 2212.47 494.264   6
  -2  -8 -16 56.2850 107.903   6
  -2  -8 -16-64.9147 53.3359   4
  -2  -8 -17 891.818 325.617   6
  -2  -8 -17 400.850 188.180   4
  -2  -8 -18 1340.88 456.721   6
   2   9 -13-109.247 117.666   2
   2   9 -12 1737.35 315.322   2
   2   9 -11 3246.46 401.809   2
   2   9 -10 497.661 338.626   6
   2   9 -10 569.368 182.343   2
   2   9  -9 857.767 357.372   6
   2   9  -9 521.470 177.695   2
   2   9  -8 4293.05 705.867   6
   2   9  -8 3884.24 478.204   2
  -2  -9   7 135.284 72.4354   5
   2   9  -7 221.036 156.062   2
   2   9  -7 246.238 180.386   6
  -2  -9   6 7832.70 482.925   5
   2   9  -6 7522.29 846.921   6
   2   9  -6 8134.84 673.633   2
   2   9  -5 6283.54 739.568   6
  -2  -9   5 6052.71 420.338   5
   2   9  -5 7542.25 635.037   2
  -2  -9   4 384.072 92.5888   5
   2   9  -4 1022.00 339.743   6
   2   9  -4 840.424 213.095   2
   2   9  -3 1339.30 256.645   2
  -2  -9   3 1047.64 161.768   5
  -2  -9   2 6945.62 448.566   5
  -2  -9   2 3119.32 875.801   4
  -2  -9   1 4359.47 977.229   4
  -2  -9   1 5096.74 383.404   5
  -2  -9   0 487.344 128.202   5
  -2  -9  -1 4207.75 363.059   5
  -2  -9  -1 2108.40 698.701   4
  -2  -9  -2 3554.06 806.942   4
  -2  -9  -2 5963.00 412.646   5
  -2  -9  -3 4244.77 826.339   4
  -2  -9  -3 6330.09 434.206   5
  -2  -9  -4 6215.46 431.116   5
  -2  -9  -4 5718.44 858.375   4
  -2  -9  -5 4799.09 726.339   4
  -2  -9  -5 5356.28 388.638   5
  -2  -9  -6 57.1348 91.9679   4
  -2  -9  -6 122.577 75.6464   5
   2   9   6 50.9723 26.2606   1
  -2  -9  -7 7257.04 456.225   5
  -2  -9  -7 5781.72 695.191   4
  -2  -9  -7 3880.03 552.389   6
  -2  -9  -8 2960.19 453.501   6
  -2  -9  -8 4488.01 353.738   5
  -2  -9  -8 3180.68 476.384   4
  -2  -9  -9 1395.43 298.450   4
  -2  -9  -9 1176.88 170.459   5
  -2  -9  -9 860.888 267.169   6
  -2  -9 -10 5358.21 386.311   5
  -2  -9 -10 4380.01 580.321   6
  -2  -9 -10 4480.57 508.383   4
  -2  -9 -11 5542.49 392.614   5
  -2  -9 -11 4517.13 593.112   6
  -2  -9 -11 4128.00 491.805   4
  -2  -9 -12 2591.23 490.142   6
  -2  -9 -12 2090.41 356.643   4
  -2  -9 -12 2553.50 259.754   5
  -2  -9 -13 601.274 310.395   6
  -2  -9 -13 518.979 119.233   5
  -2  -9 -13 182.540 104.732   4
  -2  -9 -14 2036.27 463.530   6
  -2  -9 -14 1680.14 339.656   4
  -2  -9 -15 442.971 251.653   6
  -2  -9 -15 92.6421 94.2125   4
  -2  -9 -16 1236.64 414.141   6
  -2  -9 -16 771.842 241.124   4
  -2  -9 -17 1191.09 307.277   4
  -2  -9 -17 1641.92 482.789   6
  -2  -9 -18-43.7369 171.675   6
   2  10 -13 2396.16 404.177   2
   2  10 -12 1581.20 308.442   2
   2  10 -11 110.003 107.564   2
   2  10 -10 824.486 227.807   2
   2  10  -9 1689.54 471.654   6
   2  10  -9 1068.75 259.531   2
   2  10  -8 458.425 192.962   2
   2  10  -8 348.969 248.845   6
   2  10  -7 2583.32 406.517   2
   2  10  -7 2330.16 517.992   6
   2  10  -6 11482.2 1100.63   6
  -2 -10   6 11444.2 636.873   5
   2  10  -6 12590.7 889.343   2
  -2 -10   5 169.835 55.2084   5
   2  10  -5 448.955 182.912   2
   2  10  -5 312.667 249.608   6
   2  10  -4 2416.22 474.496   6
  -2 -10   4 2366.30 266.166   5
   2  10  -4 2773.85 407.860   2
   2  10  -3 2424.99 383.378   2
  -2 -10   3 2181.23 257.137   5
  -2 -10   2 6.52997 72.7209   5
  -2 -10   2-93.9560 209.014   4
  -2 -10   1 411.676 414.389   4
  -2 -10   1 504.725 131.935   5
  -2 -10   0 7767.47 506.571   5
  -2 -10  -1 43.6269 67.2867   5
  -2 -10  -1 295.747 343.530   4
  -2 -10  -2 3243.48 829.626   4
  -2 -10  -2 6228.22 452.406   5
  -2 -10  -3 7311.58 501.210   5
  -2 -10  -3 5450.19 1000.29   4
  -2 -10  -4 4627.07 387.923   5
  -2 -10  -4 3499.43 733.427   4
  -2 -10  -5 71.5097 82.5459   5
  -2 -10  -5-0.08537 186.880   4
  -2 -10  -6 8504.08 526.066   5
  -2 -10  -6 6316.96 881.356   4
  -2 -10  -7 11482.7 623.250   5
  -2 -10  -7 9860.16 1030.58   4
  -2 -10  -8-43.8851 142.168   6
  -2 -10  -8 125.720 139.877   4
  -2 -10  -8 72.2621 64.6076   5
  -2 -10  -9 2971.09 481.321   4
  -2 -10  -9 4119.45 359.340   5
  -2 -10  -9 2407.42 453.570   6
  -2 -10 -10 706.620 259.977   6
  -2 -10 -10 1155.90 189.800   5
  -2 -10 -10 1268.20 301.323   4
  -2 -10 -11 198.295 154.378   4
  -2 -10 -11-99.1859 112.565   5
  -2 -10 -11-23.6067 83.7986   6
  -2 -10 -12 2566.72 483.030   6
  -2 -10 -12 2313.12 254.582   5
  -2 -10 -12 1958.43 373.861   4
  -2 -10 -13 2679.98 430.821   4
  -2 -10 -13 3885.21 346.889   5
  -2 -10 -13 3926.81 614.178   6
  -2 -10 -14 20.0442 79.4078   4
  -2 -10 -14 237.965 112.126   5
  -2 -10 -14 149.240 201.980   6
  -2 -10 -15 2480.86 432.243   4
  -2 -10 -15 2850.36 573.027   6
  -2 -10 -16 1311.67 330.905   4
  -2 -10 -16 1916.58 502.041   6
  -2 -10 -17 719.516 353.519   6
  -2 -10 -17 400.280 174.754   4
  -2 -10 -18 730.550 354.054   6
   2  11 -12 369.342 193.364   2
   2  11 -11 1850.63 339.739   2
   2  11 -10 772.734 243.313   2
   2  11  -9-239.769 180.239   2
   2  11  -8 771.533 245.340   2
   2  11  -7 2289.11 549.944   6
   2  11  -7 2231.58 396.741   2
   2  11  -6 146.987 205.988   6
  -2 -11   6 110.120 88.4332   5
   2  11  -6 178.051 152.275   2
   2  11  -5 3379.25 624.515   6
  -2 -11   5 2927.74 321.336   5
   2  11  -5 3327.37 471.475   2
   2  11  -4 3995.49 524.263   2
   2  11  -4 3344.13 569.008   6
  -2 -11   4 3772.32 367.880   5
  -2 -11   3-17.7242 86.6107   5
   2  11  -3-16.8574 125.360   2
  -2 -11   2 3810.62 359.194   5
  -2 -11   2 2307.92 891.301   4
  -2 -11   1 10036.8 612.660   5
  -2 -11   1 6621.17 1402.28   4
  -2 -11   0 1248.80 211.443   5
  -2 -11   0 398.717 398.623   4
  -2 -11  -1-417.222 397.413   4
  -2 -11  -1 144.814 103.005   5
  -2 -11  -2 550.534 497.090   4
  -2 -11  -2 668.548 151.598   5
  -2 -11  -3 175.851 115.211   5
  -2 -11  -3 141.316 256.497   4
  -2 -11  -4 2421.85 305.570   5
  -2 -11  -4 1738.19 573.099   4
  -2 -11  -5 6891.94 513.303   5
  -2 -11  -5 4581.80 892.650   4
  -2 -11  -6 2512.81 298.881   5
  -2 -11  -6 2381.80 588.592   4
  -2 -11  -7 1349.98 215.691   5
  -2 -11  -7 840.736 362.606   4
  -2 -11  -8 4995.48 762.531   4
  -2 -11  -8 6271.66 484.709   5
  -2 -11  -9 625.411 262.150   6
  -2 -11  -9 3318.60 333.218   5
  -2 -11  -9 2629.02 519.975   4
  -2 -11 -10 250.631 215.969   6
  -2 -11 -10 93.1517 67.5464   5
  -2 -11 -11 1203.15 319.728   4
  -2 -11 -11 1134.73 192.094   5
  -2 -11 -11 743.176 302.366   6
  -2 -11 -12 1670.63 234.109   5
  -2 -11 -12 1385.67 370.997   6
  -2 -11 -12 1984.23 397.233   4
  -2 -11 -13 121.604 179.863   6
  -2 -11 -13-42.5875 130.160   5
  -2 -11 -14 4120.74 380.368   5
  -2 -11 -14 3121.06 500.010   4
  -2 -11 -14 2849.81 583.994   6
  -2 -11 -15 249.519 166.818   4
  -2 -11 -15 391.232 257.612   6
  -2 -11 -16 1151.42 422.373   6
  -2 -11 -16 316.009 189.699   4
  -2 -11 -17 994.709 417.340   6
  -2 -11 -18 1660.25 519.790   6
   2  12 -10 410.942 172.732   2
   2  12  -9 3078.77 481.102   2
   2  12  -8 958.886 275.726   2
   2  12  -7-53.5276 120.944   2
  -2 -12   6 1700.76 270.863   5
   2  12  -6 1482.60 328.241   2
   2  12  -5 3493.57 644.786   6
   2  12  -5 3801.67 541.180   2
  -2 -12   5 2532.39 316.711   5
  -2 -12   4-81.9225 97.5267   5
   2  12  -4 18.3138 132.204   6
   2  12  -4-122.445 125.623   2
  -2 -12   3 1551.87 243.432   5
   2  12  -3 1824.89 372.046   2
  -2 -12   2 2461.11 312.096   5
  -2 -12   2 1106.43 742.628   4
  -2 -12   1-78.5454 261.367   4
  -2 -12   1 174.770 92.5343   5
  -2 -12   0 2687.72 328.333   5
  -2 -12   0 974.119 560.559   4
  -2 -12  -1 7923.07 1555.06   4
  -2 -12  -1 13438.2 749.624   5
  -2 -12  -2-45.1536 70.5993   5
  -2 -12  -2 355.184 501.128   4
  -2 -12  -3 2601.84 329.721   5
  -2 -12  -3 1915.04 788.758   4
  -2 -12  -4 7729.21 566.154   5
  -2 -12  -4 5253.50 1083.12   4
  -2 -12  -5 265.323 126.656   5
  -2 -12  -5 308.003 315.496   4
  -2 -12  -6 4096.96 403.141   5
  -2 -12  -6 3630.92 803.284   4
  -2 -12  -7 6102.16 504.530   5
  -2 -12  -7 4748.67 852.194   4
  -2 -12  -8 884.684 183.572   5
  -2 -12  -8 507.364 292.943   4
  -2 -12  -9 954.032 188.949   5
  -2 -12  -9 908.902 346.707   4
  -2 -12 -10 8440.19 591.577   5
  -2 -12 -10 6415.99 876.265   4
  -2 -12 -11 1905.75 474.744   6
  -2 -12 -11 4552.66 428.225   5
  -2 -12 -11 3738.97 625.027   4
  -2 -12 -12 269.800 152.645   6
  -2 -12 -12-94.3144 125.824   5
  -2 -12 -12 239.769 185.848   4
  -2 -12 -13 4772.51 437.576   5
  -2 -12 -13 4183.17 624.028   4
  -2 -12 -13 3178.44 611.312   6
  -2 -12 -14 2850.53 341.674   5
  -2 -12 -14 1832.12 410.430   4
  -2 -12 -14 1605.52 458.958   6
  -2 -12 -15 219.444 163.654   4
  -2 -12 -15 387.410 215.976   6
  -2 -12 -16 2291.94 568.797   6
  -2 -12 -16 1245.82 361.145   4
  -2 -12 -17 668.367 398.037   6
   2  13  -9 354.227 180.601   2
   2  13  -8 891.734 301.051   2
   2  13  -7 2531.34 454.658   2
   2  13  -6 1199.91 316.713   2
   2  13  -5 204.561 157.565   2
  -2 -13   5-201.969 151.395   5
  -2 -13   4 2525.11 334.122   5
   2  13  -4 2787.90 486.291   2
  -2 -13   3 1229.30 235.074   5
   2  13  -3 1509.61 341.753   2
  -2 -13   2 220.978 96.6204   5
  -2 -13   1 1042.74 768.826   4
  -2 -13   1 1412.58 236.476   5
  -2 -13   0 629.581 430.250   4
  -2 -13   0 745.138 184.431   5
  -2 -13  -1 786.603 179.508   5
  -2 -13  -1 29.4503 217.402   4
  -2 -13  -2 4738.78 1218.40   4
  -2 -13  -2 7929.46 597.720   5
  -2 -13  -3 6061.98 1329.60   4
  -2 -13  -3 9630.42 667.758   5
  -2 -13  -4 72.7997 129.542   5
  -2 -13  -4 258.065 423.988   4
  -2 -13  -5 5226.40 1095.74   4
  -2 -13  -5 7089.76 564.482   5
  -2 -13  -6 8976.32 647.015   5
  -2 -13  -6 7622.86 1253.88   4
  -2 -13  -7 87.0603 92.1811   5
  -2 -13  -7 47.2205 210.914   4
  -2 -13  -8 1757.69 564.288   4
  -2 -13  -8 2131.49 309.940   5
  -2 -13  -9 2078.16 301.273   5
  -2 -13  -9 1714.71 517.554   4
  -2 -13 -10 770.129 173.095   5
  -2 -13 -10 1286.48 414.413   4
  -2 -13 -11 799.238 177.205   5
  -2 -13 -11 687.958 305.590   4
  -2 -13 -12 3915.94 420.902   5
  -2 -13 -12 3340.79 644.619   4
  -2 -13 -13 1640.87 255.470   5
  -2 -13 -13 391.071 255.097   6
  -2 -13 -13 939.336 312.908   4
  -2 -13 -14 285.916 227.287   6
  -2 -13 -14 237.901 94.5447   5
  -2 -13 -14 735.497 310.401   4
  -2 -13 -15 2003.00 438.056   4
  -2 -13 -15 1467.40 486.040   6
  -2 -13 -16 614.472 347.802   6
  -2 -13 -17 637.719 383.670   6
   2  14  -8 1857.03 418.888   2
   2  14  -7 1446.79 395.227   2
   2  14  -6 580.359 322.050   2
  -2 -14   5 3982.03 439.671   5
   2  14  -5 5052.03 666.772   2
  -2 -14   4 1959.05 307.658   5
   2  14  -4 2221.03 438.958   2
  -2 -14   3 53.7803 151.208   5
   2  14  -3 48.0148 89.2695   2
  -2 -14   2 1995.08 304.431   5
  -2 -14   1 186.805 70.0686   5
  -2 -14   1 155.908 312.258   4
  -2 -14   0-163.056 139.186   5
  -2 -14   0 561.059 597.980   4
  -2 -14  -1 1354.48 249.754   5
  -2 -14  -2 6809.48 579.235   5
  -2 -14  -2 3189.31 1123.06   4
  -2 -14  -3 572.132 608.899   4
  -2 -14  -3 736.515 204.114   5
  -2 -14  -4 1333.30 271.296   5
  -2 -14  -4 862.802 582.953   4
  -2 -14  -5 3332.74 402.125   5
  -2 -14  -5 2777.19 824.671   4
  -2 -14  -6 697.070 206.607   5
  -2 -14  -6 718.396 432.819   4
  -2 -14  -7 3130.00 383.640   5
  -2 -14  -7 1827.41 615.174   4
  -2 -14  -8 4381.87 464.406   5
  -2 -14  -8 3811.90 859.966   4
  -2 -14  -9 314.520 150.742   5
  -2 -14  -9 80.1812 154.403   4
  -2 -14 -10-160.371 133.419   5
  -2 -14 -10 12.3589 174.973   4
  -2 -14 -11 543.825 161.159   5
  -2 -14 -11 244.105 214.792   4
  -2 -14 -12-71.6725 131.282   5
  -2 -14 -12 483.857 340.762   4
  -2 -14 -13 1071.70 405.739   4
  -2 -14 -13 1157.10 221.002   5
  -2 -14 -14 4095.15 438.695   5
  -2 -14 -14 2517.75 593.094   4
  -2 -14 -15 777.872 365.054   4
  -2 -14 -15 691.869 330.020   6
  -2 -14 -15 822.551 187.447   5
  -2 -14 -16 257.152 287.203   6
   2  15  -6 1570.33 383.844   2
   2  15  -5 847.513 294.313   2
  -2 -15   4-74.7352 185.343   5
   2  15  -4 250.145 158.582   2
  -2 -15   3 3905.39 442.011   5
   2  15  -3 3867.65 619.936   2
  -2 -15   2 468.564 122.689   5
  -2 -15   1 88.8450 333.021   4
  -2 -15   1-165.317 172.561   5
  -2 -15   0 2213.13 342.438   5
  -2 -15   0 1918.19 1070.08   4
  -2 -15  -1 863.226 210.642   5
  -2 -15  -1 841.587 746.161   4
  -2 -15  -2 162.863 457.119   4
  -2 -15  -2 174.325 129.523   5
  -2 -15  -3 472.426 452.591   4
  -2 -15  -3 2187.78 318.900   5
  -2 -15  -4 3090.59 405.351   5
  -2 -15  -4 1979.61 831.079   4
  -2 -15  -5 141.302 136.229   5
  -2 -15  -5 247.590 250.067   4
  -2 -15  -6 1514.15 617.971   4
  -2 -15  -6 1944.06 330.395   5
  -2 -15  -7 4828.19 507.666   5
  -2 -15  -7 3263.11 920.778   4
  -2 -15  -8 24.8546 128.790   5
  -2 -15  -8 356.187 319.986   4
  -2 -15  -9 2676.78 383.098   5
  -2 -15  -9 2150.45 707.880   4
  -2 -15 -10 925.620 204.595   5
  -2 -15 -10 1256.14 508.220   4
  -2 -15 -11-74.5396 138.285   5
  -2 -15 -11 251.115 192.109   4
  -2 -15 -12 1066.70 458.884   4
  -2 -15 -12 1172.14 240.679   5
  -2 -15 -13 5031.74 529.538   5
  -2 -15 -13 3544.91 772.337   4
  -2 -15 -14 690.608 284.395   4
  -2 -15 -14 657.554 123.248   5
  -2 -15 -15 601.454 148.781   5
   2  16  -4 2129.28 476.028   2
  -2 -16   3 186.156 108.545   5
   2  16  -3 410.776 241.044   2
  -2 -16   2 851.967 196.861   5
   2  16  -2 2385.88 508.207   2
  -2 -16   1 4216.06 490.483   5
  -2 -16   1 3094.63 1357.69   4
  -2 -16   0 752.986 188.352   5
  -2 -16   0 2078.75 983.071   4
  -2 -16  -1-114.821 137.869   5
  -2 -16  -1-146.718 378.495   4
  -2 -16  -2 3724.32 457.746   5
  -2 -16  -3 1737.93 317.643   5
  -2 -16  -3 1037.83 746.175   4
  -2 -16  -4 605.050 588.243   4
  -2 -16  -4 68.4037 86.5447   5
  -2 -16  -5 1323.34 270.798   5
  -2 -16  -5 1466.80 807.456   4
  -2 -16  -6 1571.85 292.067   5
  -2 -16  -6 1515.80 760.147   4
  -2 -16  -7-87.6510 90.4562   5
  -2 -16  -7 56.6813 392.961   4
  -2 -16  -8 5295.66 554.298   5
  -2 -16  -8 6250.15 1289.61   4
  -2 -16  -9 4573.22 516.905   5
  -2 -16  -9 4788.45 1160.32   4
  -2 -16 -10 200.799 99.6810   5
  -2 -16 -10 540.313 420.422   4
  -2 -16 -11 1893.59 327.835   5
  -2 -16 -11 1088.57 515.421   4
  -2 -16 -12 2356.98 703.932   4
  -2 -16 -12 2416.89 360.259   5
  -2 -16 -13-243.133 229.756   5
  -2 -16 -13 111.732 295.617   4
  -2 -16 -14 863.838 177.442   5
  -2 -16 -14 1161.24 486.702   4
  -2 -16 -15 1834.93 304.505   5
  -2 -17   3 310.803 93.7171   5
  -2 -17   2 924.817 221.352   5
  -2 -17   1-273.512 203.746   5
  -2 -17   0 382.331 129.075   5
  -2 -17   0 479.103 526.480   4
  -2 -17  -1 2315.60 366.795   5
  -2 -17  -1 1812.75 1061.47   4
  -2 -17  -2 1071.77 260.846   5
  -2 -17  -2 802.473 700.410   4
  -2 -17  -3 608.464 190.106   5
  -2 -17  -3 653.956 566.605   4
  -2 -17  -4 5374.33 581.261   5
  -2 -17  -4 4013.11 1315.69   4
  -2 -17  -5 418.944 197.422   5
  -2 -17  -5 851.581 696.502   4
  -2 -17  -6 800.807 186.053   5
  -2 -17  -6 193.287 328.826   4
  -2 -17  -7 1268.82 269.346   5
  -2 -17  -7 1618.50 748.238   4
  -2 -17  -8 666.358 212.401   5
  -2 -17  -8 547.231 378.945   4
  -2 -17  -9 281.580 102.665   5
  -2 -17  -9 244.919 327.091   4
  -2 -17 -10 2280.96 786.600   4
  -2 -17 -10 1901.64 332.482   5
  -2 -17 -11 1526.73 291.474   5
  -2 -17 -11 1524.75 606.076   4
  -2 -17 -12-239.137 168.567   5
  -2 -17 -12 418.055 469.794   4
  -2 -17 -13 1659.11 301.983   5
  -2 -17 -13 1458.31 611.550   4
  -2 -17 -14 1766.70 301.766   5
  -2 -17 -15-441.408 269.595   5
  -2 -18   1 412.568 149.408   5
  -2 -18   0 1020.32 258.805   5
  -2 -18  -1 150.177 118.013   5
  -2 -18  -1 479.791 700.781   4
  -2 -18  -2 90.5242 152.864   5
  -2 -18  -2 1045.07 949.408   4
  -2 -18  -3 3094.68 444.432   5
  -2 -18  -4 476.149 155.300   5
  -2 -18  -4 1071.94 808.488   4
  -2 -18  -5 1446.48 309.613   5
  -2 -18  -5 914.654 767.662   4
  -2 -18  -6 1314.12 709.330   4
  -2 -18  -6 2500.47 401.383   5
  -2 -18  -7 494.837 230.235   5
  -2 -18  -7 1553.02 1010.37   4
  -2 -18  -8-9.06451 150.075   5
  -2 -18  -8 816.842 643.400   4
  -2 -18  -9 1897.35 358.177   5
  -2 -18  -9 1308.16 655.129   4
  -2 -18 -10 1092.71 263.576   5
  -2 -18 -10 905.534 569.494   4
  -2 -18 -11-337.588 241.902   5
  -2 -18 -11 80.6887 246.327   4
  -2 -18 -12 1161.57 267.961   5
  -2 -18 -12 1182.46 610.938   4
  -2 -19  -4 530.734 586.374   4
  -2 -19  -5 1759.33 978.004   4
  -2 -19  -6 392.036 554.331   4
  -2 -19  -7 1239.12 929.645   4
  -2 -19  -8 2557.11 1131.86   4
  -2 -19  -9 1069.45 722.348   4
  -2 -19 -10 577.842 544.892   4
  -2 -19 -11 539.994 512.078   4
   3 -17 -10 1078.05 544.771   4
   3 -17  -9 76.3076 294.133   4
   3 -17  -8 495.378 418.400   4
   3 -17  -7 553.753 500.641   4
   3 -17  -6 59.8047 449.903   4
   3 -17  -5 3314.73 1114.13   4
   3 -17  -4 1857.08 912.806   4
   3 -17  -3 230.163 549.132   4
   3 -16 -12 2008.01 648.751   4
   3 -16 -11 594.543 424.567   4
   3 -16 -10 1190.87 586.159   4
   3 -16  -9 2773.24 810.467   4
   3 -16  -8 661.589 407.416   4
   3 -16  -7 441.998 356.508   4
   3 -16  -6 1593.54 717.049   4
   3 -16  -5 2269.99 865.939   4
   3 -16  -4 728.207 588.302   4
   3 -16  -3 4233.65 1339.87   4
   3 -16  -2 2863.15 1149.96   4
   3 -16  -1 50.9882 362.359   4
   3 -16   0 1646.91 894.479   4
   3 -16   1 563.968 605.238   4
   3 -15 -14 466.324 314.066   4
   3 -15 -13 730.058 365.176   4
   3 -15 -12 144.850 209.891   4
   3 -15 -11 735.554 415.542   4
   3 -15 -10 2331.80 638.315   4
   3 -15  -9 1573.86 635.493   4
   3 -15  -8 1214.69 581.632   4
   3 -15  -7 3034.59 846.915   4
   3 -15  -6 737.776 524.125   4
   3 -15  -5 129.130 262.888   4
   3 -15  -4 1994.64 865.617   4
   3 -15  -3 925.123 639.495   4
   3 -15  -2 16.5897 239.003   4
   3 -15  -1 2345.09 1107.07   4
   3 -15   0 1293.31 882.588   4
   3 -15   1 614.850 759.213   4
   3 -15   3 2707.30 1369.96   4
   3 -14 -15 795.102 342.810   4
   3 -14 -14 1052.27 388.807   4
   3 -14 -13 291.878 209.609   4
   3 -14 -12 514.695 282.235   4
   3 -14 -11 932.190 411.564   4
   3 -14 -10 168.685 176.980   4
   3 -14  -9 562.986 329.431   4
   3 -14  -8 2453.03 698.411   4
   3 -14  -7 580.056 406.631   4
   3 -14  -6 428.958 419.102   4
   3 -14  -5 3923.22 975.290   4
   3 -14  -4 925.484 548.727   4
   3 -14  -3 198.564 273.121   4
   3 -14  -2 393.830 485.823   4
   3 -14  -1 473.087 451.114   4
   3 -14   0-14.0006 509.762   4
   3 -14   1 1827.19 972.718   4
   3 -14   2 507.864 642.334   4
   3 -14   3 141.391 486.935   4
   3 -14   4 1517.73 1048.04   4
   3 -14   5 1208.16 1060.05   4
  -3  14  -6 309.875 517.148   6
   3 -13 -16 1240.64 428.659   4
   3 -13 -15 1042.75 368.543   4
   3 -13 -14 276.499 263.520   4
   3 -13 -13 1717.34 455.164   4
   3 -13 -12 3314.40 647.689   4
   3 -13 -11 182.405 193.791   4
   3 -13 -10 538.117 261.176   4
   3 -13  -9 1466.50 453.582   4
   3 -13  -8 259.413 237.709   4
   3 -13  -7 358.804 295.394   4
   3 -13  -6 2353.79 696.230   4
   3 -13  -5 2337.34 706.542   4
   3 -13  -4 2324.74 764.064   4
   3 -13  -3 3729.01 1060.09   4
   3 -13  -2 210.136 363.128   4
   3 -13  -1 692.711 393.606   4
   3 -13   0 3281.87 1181.68   4
   3 -13   1 3271.42 1180.14   4
   3 -13   2 1155.31 845.852   4
   3 -13   3 1349.49 1022.11   4
   3 -13   4 883.234 799.672   4
   3 -13   5 171.489 532.560   4
  -3  13  -7 1915.10 703.789   6
  -3  13  -8 505.874 367.854   6
   3 -12 -16 950.126 330.569   4
   3 -12 -15 307.915 211.688   4
   3 -12 -14 328.071 212.176   4
   3 -12 -13 593.623 265.066   4
   3 -12 -12 52.1200 112.438   4
   3 -12 -11 2985.21 570.995   4
   3 -12 -10 1947.70 466.835   4
   3 -12  -9 193.764 182.785   4
   3 -12  -8 2141.41 537.987   4
   3 -12  -7 2378.66 609.414   4
   3 -12  -6 516.990 314.620   4
   3 -12  -5 288.908 345.130   4
   3 -12  -4 6459.95 1166.41   4
   3 -12  -3 521.715 472.212   4
   3 -12  -2 2427.81 841.738   4
   3 -12  -1 295.909 316.069   4
   3 -12   0 308.452 485.075   4
   3 -12   1 837.744 594.681   4
   3 -12   2 2498.90 1112.90   4
   3 -12   3 1016.61 746.859   4
   3 -12   4 780.233 808.163   4
   3 -12   5 458.088 660.036   4
  -3  12  -6 739.389 254.109   2
  -3  12  -7 340.232 247.513   6
  -3  12  -8 2124.85 715.242   6
  -3  12  -9 1413.12 631.462   6
   3 -11 -17 376.331 248.158   4
   3 -11 -16 117.754 136.986   4
   3 -11 -15 2498.59 514.094   4
   3 -11 -14 1682.05 411.330   4
   3 -11 -13 382.687 215.111   4
   3 -11 -12 2766.41 510.458   4
   3 -11 -11 1281.74 354.307   4
   3 -11 -10 1421.25 380.672   4
   3 -11  -9 4603.15 697.904   4
   3 -11  -8 5020.65 743.405   4
   3 -11  -7 952.990 349.718   4
   3 -11  -6 712.956 344.693   4
   3 -11  -5 3470.60 741.387   4
   3 -11  -4 351.533 356.860   4
   3 -11  -3 3529.14 871.137   4
   3 -11  -2 3572.08 906.229   4
   3 -11  -1 181.849 244.941   4
   3 -11   0 2340.47 879.332   4
   3 -11   1 3682.05 1109.22   4
   3 -11   2 1766.11 854.602   4
   3 -11   3 1113.20 755.165   4
   3 -11   4 2832.15 1142.46   4
   3 -11   5 1689.56 960.943   4
  -3  11  -6 178.126 121.218   2
  -3  11  -7 1995.46 692.194   6
  -3  11  -8 2985.71 822.524   6
  -3  11  -9 165.142 208.104   6
  -3  11 -10 1830.18 686.516   6
   3 -10 -17 183.905 280.482   6
   3 -10 -17 309.935 216.254   4
   3 -10 -16 1890.56 570.762   6
   3 -10 -16 2509.22 518.712   4
   3 -10 -15-90.7071 146.831   6
   3 -10 -15 245.315 185.020   4
   3 -10 -14 1643.97 385.127   4
   3 -10 -13 2282.82 461.014   4
   3 -10 -12 1943.33 406.717   4
   3 -10 -11-4.03098 77.1507   4
   3 -10 -10 4145.47 587.768   4
   3 -10  -9 467.981 218.905   4
   3 -10  -8 359.949 211.044   4
   3 -10  -7 1355.91 144.055   1
   3 -10  -7 1202.82 337.812   4
   3 -10  -6 1796.57 464.383   4
   3 -10  -5-54.9944 174.758   4
   3 -10  -4 11496.0 1322.99   4
   3 -10  -3 9624.80 1282.75   4
   3 -10  -2 292.924 343.488   4
   3 -10  -1 1526.97 581.896   4
   3 -10   0 2779.71 856.328   4
   3 -10   1 455.659 412.437   4
   3 -10   2 1905.90 824.900   4
   3 -10   3 5667.26 1495.37   4
   3 -10   4 650.974 617.353   4
   3 -10   5 535.643 589.441   4
  -3  10  -6 936.653 259.463   2
  -3  10  -7 1655.09 299.230   2
  -3  10  -7 1733.42 556.741   6
  -3  10  -8 1336.87 527.894   6
  -3  10  -9 2441.73 739.757   6
  -3  10 -10 2159.45 644.220   6
  -3  10 -11 1033.99 595.991   6
   3  -9 -18 353.195 188.491   4
   3  -9 -17 901.791 296.243   4
   3  -9 -17 1061.00 463.356   6
   3  -9 -16 640.018 248.455   4
   3  -9 -16 597.897 352.525   6
   3  -9 -15 1045.46 309.881   4
   3  -9 -15 889.366 431.029   6
   3  -9 -14 2150.55 538.853   6
   3  -9 -14 2084.45 418.733   4
   3  -9 -13 1267.68 327.149   4
   3  -9 -13 617.160 300.482   6
   3  -9 -12 216.097 169.647   4
   3  -9 -12-65.0798 122.492   6
   3  -9 -11 1934.32 397.484   4
   3  -9 -10 321.612 158.402   4
   3  -9  -9 1162.67 146.144   1
   3  -9  -9 1648.48 350.607   4
   3  -9  -8 3064.50 230.634   1
   3  -9  -8 3704.31 537.663   4
   3  -9  -7 1061.24 290.507   4
   3  -9  -7 795.385 115.276   1
   3  -9  -6 66.2889 121.292   4
   3  -9  -6 113.221 59.6896   1
   3  -9  -5 2937.61 552.070   4
   3  -9  -5 2856.44 254.627   1
   3  -9  -4 6337.13 883.925   4
   3  -9  -3 292.999 244.080   4
   3  -9  -2 6164.83 1042.46   4
   3  -9  -1 4834.94 965.919   4
   3  -9   0 458.020 482.460   4
   3  -9   1 1693.06 647.779   4
   3  -9   2 1467.80 633.598   4
   3  -9   3 884.788 705.824   4
   3  -9   4 2497.60 1004.75   4
   3  -9   5 2946.96 1043.02   4
  -3   9  -6 58.4928 82.7584   2
   3  -9   6-86.8473 389.661   4
  -3   9  -7 1997.85 654.010   6
  -3   9  -7 2511.78 348.344   2
  -3   9  -8 3724.55 836.703   6
  -3   9  -9 1009.29 445.369   6
  -3   9 -10 2894.90 778.645   6
  -3   9 -11 1733.38 644.055   6
  -3   9 -12 977.122 513.117   6
   3  -8 -18 292.928 166.521   4
   3  -8 -17 503.492 326.725   6
   3  -8 -17 70.5745 99.6954   4
   3  -8 -16 65.8920 107.636   4
   3  -8 -16 615.076 375.586   6
   3  -8 -15 2101.20 429.957   4
   3  -8 -15 2279.13 555.050   6
   3  -8 -14 265.066 153.897   4
   3  -8 -14 500.479 305.581   6
   3  -8 -13 332.769 155.654   4
   3  -8 -13 245.348 180.477   6
   3  -8 -12 1231.85 409.536   6
   3  -8 -12 1869.42 369.349   4
   3  -8 -11 1308.09 377.418   6
   3  -8 -11 2181.50 395.415   4
   3  -8 -10 81.1032 71.5744   4
   3  -8  -9 1359.99 298.837   4
   3  -8  -8 44.3361 47.0757   1
   3  -8  -8-3.68214 61.1555   4
   3  -8  -7 473.433 98.0665   1
   3  -8  -7 534.648 190.941   4
   3  -8  -6 2928.48 457.838   4
   3  -8  -6 2541.44 223.710   1
   3  -8  -5 2805.65 483.916   4
   3  -8  -5 2122.93 213.118   1
   3  -8  -4 65.3462 143.202   4
   3  -8  -4 50.8093 81.1481   1
   3  -8  -3 9675.25 1064.25   4
   3  -8  -3 7419.87 471.505   1
   3  -8  -2 1165.54 451.659   4
   3  -8  -1 184.301 218.170   4
   3  -8   0 3090.39 764.119   4
   3  -8   1 1827.67 603.525   4
   3  -8   2 1742.13 701.097   4
   3  -8   3 1995.94 810.494   4
   3  -8   5 146.996 354.587   4
   3  -8   6 1814.43 823.675   4
  -3   8  -6 2983.39 370.312   2
  -3   8  -7 4782.94 453.697   2
  -3   8  -7 4255.08 841.379   6
  -3   8  -8 141.652 111.322   2
  -3   8  -8-27.5456 196.293   6
  -3   8  -9 4348.42 893.839   6
  -3   8 -10 2135.06 615.763   6
  -3   8 -11 653.067 439.469   6
  -3   8 -12 307.268 213.065   6
  -3   8 -13 932.604 519.202   6
   3  -7 -18 902.235 281.479   4
   3  -7 -18 700.230 423.653   6
   3  -7 -17 1023.49 387.990   6
   3  -7 -17 1302.17 350.010   4
   3  -7 -16 1490.55 489.199   6
   3  -7 -16 1260.75 334.382   4
   3  -7 -15 272.697 156.813   4
   3  -7 -15 1100.99 406.466   6
   3  -7 -14 1560.63 340.145   4
   3  -7 -14 1718.39 458.455   6
   3  -7 -13 2285.03 415.579   4
   3  -7 -13 2954.39 595.062   6
   3  -7 -12 1325.43 290.449   4
   3  -7 -12 1044.77 367.260   6
   3  -7 -11 1709.41 337.568   4
   3  -7 -11 1283.91 391.383   6
   3  -7 -10 4720.36 545.175   4
   3  -7 -10 3800.76 633.094   6
   3  -7  -9 890.811 222.406   4
   3  -7  -9 414.958 193.889   6
   3  -7  -8 1026.58 241.690   4
   3  -7  -7 4163.50 497.255   4
   3  -7  -6 3001.87 251.532   1
   3  -7  -6 3576.74 466.896   4
   3  -7  -5 2238.27 218.699   1
   3  -7  -5 2712.77 419.612   4
   3  -7  -4 23249.0 1356.25   4
   3  -7  -4 18606.3 737.262   1
   3  -7  -3 4383.93 342.021   1
   3  -7  -3 4350.09 642.330   4
   3  -7  -2 445.064 115.793   1
   3  -7  -2 457.075 258.334   4
   3  -7  -1 1903.08 255.613   1
   3  -7  -1 2093.40 545.942   4
   3  -7   0 9044.75 1209.12   4
   3  -7   1 466.820 292.250   4
   3  -7   2 2858.08 814.841   4
   3  -7   3 3059.46 893.388   4
   3  -7   4 158.493 305.654   4
   3  -7   5 1709.78 723.367   4
  -3   7  -6 6275.87 504.843   2
   3  -7   6 3170.61 1043.34   4
  -3   7  -7 4245.27 772.479   6
  -3   7  -7 4374.79 400.819   2
  -3   7  -8 2102.97 559.620   6
  -3   7  -8 1781.19 263.136   2
  -3   7  -9 4826.94 869.901   6
  -3   7  -9 4371.56 388.774   2
  -3   7 -10 396.625 350.763   6
  -3   7 -11 2162.30 692.882   6
  -3   7 -12 1202.66 518.560   6
  -3   7 -13 1029.77 516.782   6
   3  -6 -18 1257.33 524.747   6
   3  -6 -17 1086.36 466.897   6
   3  -6 -16 396.419 263.329   6
   3  -6 -15 1799.82 493.553   6
   3  -6 -14 2626.75 556.241   6
   3  -6 -14 2000.26 377.734   4
   3  -6 -13 18.3403 77.1798   4
   3  -6 -13 172.258 232.777   6
   3  -6 -12 3522.96 469.973   4
   3  -6 -12 3536.69 601.862   6
   3  -6 -11 3583.98 463.741   4
   3  -6 -11 3038.31 548.236   6
   3  -6 -10 68.2413 94.6997   6
   3  -6 -10 86.1569 93.9159   4
   3  -6  -9 3607.82 444.678   4
   3  -6  -9 2844.34 499.098   6
   3  -6  -8 4395.64 640.882   6
   3  -6  -8 6904.63 608.207   4
   3  -6  -7 202.849 118.156   4
   3  -6  -6 2574.01 368.977   4
   3  -6  -5 5486.64 548.605   4
   3  -6  -5 5161.78 344.751   1
   3  -6  -4 4228.26 316.191   1
   3  -6  -4 5158.06 546.883   4
   3  -6  -3 5317.66 620.709   4
   3  -6  -3 4584.95 344.611   1
  -3   6   2 10425.2 607.472   1
   3  -6  -2 9346.11 932.539   4
   3  -6  -2 8529.18 501.431   1
   3  -6  -1 313.769 112.933   1
   3  -6  -1 547.963 301.064   4
   3  -6   0 99.6740 62.7400   1
   3  -6   0 126.576 175.011   4
   3  -6   1 9783.44 1267.71   4
   3  -6   2 4910.23 1028.75   4
   3  -6   3 1064.40 493.869   4
   3  -6   4 2237.29 754.740   4
   3  -6   5 3776.97 989.732   4
  -3   6  -6 88.6778 68.5787   2
  -3   6  -7 2153.63 543.777   6
  -3   6  -7 1925.22 241.245   2
  -3   6  -8 7120.61 978.213   6
  -3   6  -8 6508.50 455.020   2
  -3   6  -9 70.0974 177.704   6
  -3   6  -9 114.530 63.9226   2
  -3   6 -10 3825.56 778.169   6
  -3   6 -11 2606.84 703.504   6
  -3   6 -12-215.246 294.218   6
  -3   6 -13 2172.03 654.698   6
  -3   6 -14 3078.27 780.501   6
   3  -5 -18 727.787 400.655   6
   3  -5 -17 530.170 374.534   6
   3  -5 -16 2674.95 595.177   6
   3  -5 -15 2189.25 519.578   6
   3  -5 -14 249.486 204.260   6
   3  -5 -13 1827.75 427.806   6
   3  -5 -12 3089.25 535.981   6
   3  -5 -11 295.755 203.805   6
   3  -5 -10 2880.38 497.421   6
   3  -5  -9 1291.08 351.794   6
   3  -5  -9 1747.90 299.715   4
   3  -5  -8 1345.46 253.809   4
   3  -5  -8 1014.19 280.839   6
   3  -5  -7 2063.28 307.359   4
   3  -5  -7 1169.84 300.484   6
   3  -5  -6 4074.04 432.371   4
   3  -5  -5 247.271 120.581   4
   3  -5  -4 2413.97 231.308   1
   3  -5  -4 2969.71 369.005   4
   3  -5  -3 13267.8 612.667   1
   3  -5  -3 14644.7 895.487   4
   3  -5  -2 7300.41 454.516   1
   3  -5  -2 7763.81 715.693   4
   3  -5  -1 3387.21 540.269   4
   3  -5  -1 3257.45 300.868   1
   3  -5   0 9287.96 1009.07   4
   3  -5   0 8490.12 539.254   1
   3  -5   1 6624.95 946.642   4
   3  -5   1 6596.85 502.932   1
   3  -5   2 202.755 189.769   4
   3  -5   2 204.314 99.6943   1
   3  -5   3 1133.92 471.906   4
   3  -5   4 1075.40 487.233   4
   3  -5   5 806.651 423.060   4
  -3   5  -6 9185.11 1011.60   6
  -3   5  -6 8738.78 485.070   2
  -3   5  -7 4149.63 326.293   2
  -3   5  -7 3804.24 656.314   6
  -3   5  -8 21.0871 142.235   6
  -3   5  -8-27.1917 40.8320   2
  -3   5  -9 1393.95 452.966   6
  -3   5  -9 1775.36 189.313   2
  -3   5 -10 5092.28 855.488   6
  -3   5 -10 4036.68 301.167   2
  -3   5 -11 447.575 334.571   6
  -3   5 -12 1610.08 494.967   6
  -3   5 -13 1901.11 612.057   6
  -3   5 -14 443.765 398.478   6
  -3   5 -15 1057.11 546.291   6
   3  -4 -18 921.818 435.368   6
   3  -4 -17 3190.18 691.585   6
   3  -4 -16 2933.68 611.315   6
   3  -4 -15 267.711 235.606   6
   3  -4 -14 1302.00 384.620   6
   3  -4 -13 135.581 160.956   6
   3  -4 -12 899.884 304.723   6
   3  -4 -11 3025.73 514.132   6
   3  -4 -10 8552.21 814.176   6
   3  -4  -9 458.653 197.914   6
   3  -4  -8 5486.44 626.312   6
   3  -4  -7 9379.07 824.779   6
   3  -4  -7 11481.8 694.005   4
   3  -4  -6 684.585 173.899   4
   3  -4  -6 102.487 101.391   6
   3  -4  -5 2926.69 338.171   4
   3  -4  -4 4077.82 404.459   4
   3  -4  -3 2009.65 215.610   1
   3  -4  -3 2264.95 301.660   4
   3  -4  -2 6998.35 431.023   1
   3  -4  -2 8236.68 619.583   4
   3  -4  -1 11857.0 610.259   1
  -3   4   1 14170.5 697.350   1
   3  -4  -1 12171.3 910.408   4
   3  -4   0 4779.43 644.353   4
   3  -4   0 3914.43 347.247   1
   3  -4   1 2190.99 491.756   4
   3  -4   1 1702.82 239.178   1
   3  -4   2 12055.9 1296.37   4
   3  -4   2 13523.7 750.158   1
   3  -4   3 1561.52 269.654   1
   3  -4   3 1279.51 478.775   4
   3  -4   5 5230.59 992.310   4
  -3   4  -5 8580.05 446.837   2
  -3   4  -6 3906.03 607.579   6
  -3   4  -6 4016.87 282.583   2
  -3   4  -7 592.719 252.557   6
  -3   4  -7 808.486 130.979   2
  -3   4  -8 3828.25 653.794   6
  -3   4  -8 3892.19 257.223   2
  -3   4  -9 587.118 103.426   2
  -3   4  -9 511.162 257.682   6
  -3   4 -10 990.516 353.188   6
  -3   4 -10 999.296 144.749   2
  -3   4 -11 1622.75 470.812   6
  -3   4 -12 2237.92 580.546   6
  -3   4 -13-201.445 159.834   6
  -3   4 -14 3645.72 869.331   6
  -3   4 -15 3042.69 836.675   6
   3  -3 -18 1237.66 491.232   6
   3  -3 -17 1480.13 476.377   6
   3  -3 -16 226.593 247.881   6
   3  -3 -15 2810.99 577.308   6
   3  -3 -14 766.010 277.269   6
   3  -3 -13 2307.50 505.501   6
   3  -3 -12 2419.50 473.620   6
   3  -3 -12 1993.39 302.410   2
   3  -3 -11 3591.39 544.461   6
   3  -3 -11 3578.72 378.893   2
   3  -3 -10 125.201 81.8472   2
   3  -3 -10 270.226 158.216   6
   3  -3  -9 3392.87 481.894   6
   3  -3  -9 3315.67 325.075   2
   3  -3  -8 3363.48 456.154   6
   3  -3  -8 3292.54 313.729   2
   3  -3  -7 737.240 239.256   6
   3  -3  -7 439.984 104.669   2
   3  -3  -6 10166.6 796.769   6
   3  -3  -5 5197.88 409.707   4
   3  -3  -5 3301.73 464.213   6
   3  -3  -4 171.632 97.4964   4
   3  -3  -3 2654.84 302.936   4
   3  -3  -2 458.280 111.600   1
   3  -3  -2 552.049 137.808   4
  -3   3   2 741.376 127.511   2
   3  -3  -1 3659.44 310.975   1
  -3   3   1 4771.09 421.257   4
   3  -3  -1 4435.77 427.401   4
   3  -3   0 20837.0 879.056   1
  -3   3   0 24544.3 977.457   1
   3  -3   0 24319.5 1295.40   4
  -3   3   0 27286.7 1143.33   4
   3  -3   1 20874.8 1361.75   4
  -3   3  -1 18661.5 1057.87   4
   3  -3   1 18466.4 817.593   1
   3  -3   2 4381.93 395.448   1
   3  -3   2 3972.44 648.220   4
   3  -3   3 2114.38 556.488   4
   3  -3   3 3001.89 351.995   1
   3  -3   4 2870.17 654.885   4
  -3   3  -5 172.904 49.8182   2
  -3   3  -5-6.49700 125.315   6
   3  -3   5 2.58254 133.569   4
  -3   3  -6 5701.91 297.665   2
  -3   3  -6 6055.01 720.813   6
  -3   3  -7 8331.07 879.274   6
  -3   3  -7 8644.54 351.365   2
  -3   3  -8 1751.83 431.226   6
  -3   3  -8 1561.18 141.688   2
  -3   3  -9 707.215 338.150   6
  -3   3  -9 782.803 110.031   2
  -3   3 -10 8175.72 985.023   6
  -3   3 -10 7061.54 365.101   2
  -3   3 -11 4813.14 792.616   6
  -3   3 -11 3469.37 269.506   2
  -3   3 -12 144.631 223.726   6
  -3   3 -13 1757.85 538.874   6
  -3   3 -14 1557.16 567.242   6
  -3   3 -15 366.614 266.074   6
  -3   3 -16 3389.47 823.311   6
   3  -2 -18 139.096 268.252   6
   3  -2 -17 256.664 297.768   6
   3  -2 -16 1850.15 490.290   6
   3  -2 -15 2709.82 569.312   6
   3  -2 -15 1975.58 342.674   2
   3  -2 -14 1042.02 335.739   6
   3  -2 -14 844.552 209.225   2
   3  -2 -13 6628.32 561.224   2
   3  -2 -13 7255.77 822.727   6
   3  -2 -12 598.844 157.006   2
   3  -2 -12 657.343 244.130   6
   3  -2 -11-11.9902 61.4556   2
   3  -2 -11 67.0029 124.162   6
   3  -2 -10 642.898 145.178   2
   3  -2 -10 504.273 229.958   6
   3  -2  -9 1377.11 309.096   6
   3  -2  -9 1337.14 199.483   2
  -3   2   9 1556.30 174.425   3
   3  -2  -8-35.0224 43.4824   2
   3  -2  -8 15.5538 86.1112   6
   3  -2  -7 7859.56 443.719   2
   3  -2  -7 8124.62 669.744   6
   3  -2  -6 5609.31 537.624   6
   3  -2  -6 5955.53 368.867   2
   3  -2  -5 333.189 79.9362   2
   3  -2  -5 225.355 130.618   6
   3  -2  -4 1612.19 169.485   2
   3  -2  -4 866.942 241.334   6
   3  -2  -3 1071.65 167.485   4
   3  -2  -3 874.576 117.357   2
  -3   2   3 754.485 218.878   6
   3  -2  -2 5759.06 395.473   4
  -3   2   2 5848.61 291.154   2
  -3   2   1 22657.5 858.942   4
   3  -2  -1 19041.1 766.782   1
  -3   2   1 22079.1 636.520   2
   3  -2  -1 19848.0 849.558   4
  -3   2   0 10432.4 569.178   1
   3  -2   0 9636.65 538.820   1
  -3   2   0 10879.1 400.921   2
   3  -2   0 9793.84 648.168   4
  -3   2   0 11316.8 605.828   4
   3  -2   1 633.724 141.435   1
  -3   2  -1 698.790 165.609   1
   3  -2   1 882.908 266.753   4
  -3   2  -1 783.376 184.950   4
   3  -2   2 4226.82 371.209   1
   3  -2   2 4152.60 602.877   4
  -3   2  -2 4730.46 514.259   4
   3  -2   3 8162.26 936.457   4
  -3   2  -3 11298.0 878.547   4
   3  -2   3 11865.2 678.248   1
  -3   2  -4 2901.86 169.445   2
   3  -2   4 2564.38 541.220   4
   3  -2   4 2533.63 332.381   1
  -3   2  -5 147.869 116.491   6
  -3   2  -5 272.025 56.7099   2
  -3   2  -6 8958.81 829.513   6
  -3   2  -6 8931.68 300.728   2
  -3   2  -7 2060.97 431.446   6
  -3   2  -7 1453.68 116.194   2
  -3   2  -8-114.175 123.871   6
  -3   2  -8 7.03673 18.9004   2
  -3   2  -9 2635.14 527.800   6
  -3   2  -9 2554.13 189.283   2
  -3   2 -10 1.97184 40.1158   2
  -3   2 -10 180.535 164.437   6
  -3   2 -11 3507.80 657.237   6
  -3   2 -11 2918.11 252.516   2
  -3   2 -12 12526.3 1308.66   6
  -3   2 -13 3150.14 691.498   6
  -3   2 -14 569.016 352.915   6
  -3   2 -15 1339.12 532.212   6
  -3   2 -16 1400.85 552.544   6
   3  -1 -18 1759.30 520.681   6
   3  -1 -17 1235.65 294.310   2
   3  -1 -17 1724.24 529.925   6
   3  -1 -16 420.076 162.304   2
   3  -1 -16 678.047 351.021   6
   3  -1 -15 384.393 160.737   2
   3  -1 -15 332.333 210.712   6
   3  -1 -14 4634.33 485.791   2
   3  -1 -14 4534.83 684.511   6
   3  -1 -13 864.359 200.175   2
   3  -1 -13 1071.31 354.867   6
   3  -1 -12 1584.04 256.264   2
   3  -1 -12 1858.43 424.069   6
   3  -1 -11 4378.81 401.721   2
   3  -1 -11 4548.47 600.676   6
   3  -1 -10 1214.56 284.927   6
   3  -1 -10 1220.80 195.694   2
   3  -1  -9 1338.48 197.467   2
   3  -1  -9 1440.55 292.936   6
  -3   1   8 4806.94 267.461   3
   3  -1  -8 4184.37 329.145   2
   3  -1  -8 4295.94 475.743   6
   3  -1  -7 10287.5 724.128   6
   3  -1  -7 10136.6 497.228   2
   3  -1  -6 2474.50 221.768   2
   3  -1  -6 2596.84 345.236   6
   3  -1  -5 21023.2 706.110   2
   3  -1  -5 20523.4 977.668   6
   3  -1  -4 6613.74 539.150   6
  -3   1   4 8156.54 548.466   6
   3  -1  -4 7293.81 350.527   2
  -3   1   3 703.173 162.702   6
   3  -1  -3 551.374 87.0566   2
  -3   1   3 600.135 85.2294   2
  -3   1   2 23127.2 1087.55   6
   3  -1  -2 25038.0 687.681   2
  -3   1   2 27451.8 687.541   2
   3  -1  -1 48819.2 1361.19   4
   3  -1  -1 48321.4 1162.25   2
  -3   1   1 53991.4 1156.32   2
  -3   1   0 16552.2 633.768   4
   3  -1   0 14110.1 459.580   2
  -3   1   0 17523.2 452.127   2
   3  -1   0 16106.5 675.248   4
   3  -1   0 14861.4 662.757   1
  -3   1  -1 1950.36 247.383   1
  -3   1  -1 2143.24 119.061   2
   3  -1   1 1567.11 249.074   4
  -3   1  -1 2037.48 227.205   4
   3  -1   1 1717.91 220.477   1
  -3   1  -2 10482.8 592.743   1
   3  -1   2 9088.73 750.370   4
  -3   1  -2 8711.26 252.875   2
  -3   1  -2 10734.0 657.655   4
   3  -1   2 9979.49 566.137   1
   3  -1   3 1588.27 373.640   4
   3  -1   3 2022.02 265.780   1
  -3   1  -3 2110.43 330.073   4
  -3   1  -4 1989.18 331.268   6
  -3   1  -4 1005.64 261.628   4
   3  -1   4 1811.91 271.525   1
   3  -1   4 1053.24 300.692   4
  -3   1  -5 7393.77 214.858   2
  -3   1  -5 5058.74 664.495   4
   3  -1   5 8211.34 608.316   1
  -3   1  -5 9038.08 744.415   6
  -3   1  -6 641.264 214.760   6
  -3   1  -6 499.474 54.9262   2
  -3   1  -7 4532.05 576.842   6
  -3   1  -7 3978.48 189.861   2
  -3   1  -8 5217.47 649.669   6
  -3   1  -8 4614.96 236.782   2
  -3   1  -9 704.523 102.532   2
  -3   1  -9 682.140 249.352   6
  -3   1 -10 80.6043 47.5502   2
  -3   1 -10 159.534 129.212   6
  -3   1 -11 2129.22 211.603   2
  -3   1 -11 2847.13 561.268   6
  -3   1 -12 294.280 69.3785   2
  -3   1 -12 661.086 299.949   6
  -3   1 -13 1637.46 475.832   6
  -3   1 -14 3476.39 704.980   6
  -3   1 -15 440.744 290.744   6
  -3   1 -16 364.171 298.647   6
  -3   1 -17 643.494 364.596   6
   3   0 -18 631.392 226.800   2
   3   0 -18 591.062 322.870   6
   3   0 -17 72.8331 118.891   2
   3   0 -17 940.637 537.861   6
   3   0 -16 977.494 243.986   2
   3   0 -16 993.957 378.171   6
   3   0 -15 2607.84 380.822   2
   3   0 -15 3296.33 618.874   6
   3   0 -14 1005.64 229.133   2
   3   0 -14 1224.03 377.079   6
   3   0 -13 1338.52 360.391   6
   3   0 -13 1431.00 254.683   2
   3   0 -12 2230.03 428.458   6
   3   0 -12 2450.48 314.656   2
   3   0 -11 494.311 140.714   2
   3   0 -11 449.424 199.374   6
   3   0 -10 981.363 272.400   6
   3   0 -10 1046.92 185.987   2
   3   0  -9 11437.4 573.851   2
   3   0  -9 9384.35 324.397   5
   3   0  -9 10684.2 815.070   6
   3   0  -8 3313.27 284.185   2
   3   0  -8 3280.43 426.902   6
   3   0  -8 3723.96 195.616   5
   3   0  -7 82.8117 88.4359   6
   3   0  -7 40.0726 59.0690   2
  -3   0   7 33.4669 26.6439   3
   3   0  -6 14847.7 572.780   2
   3   0  -6 14070.5 797.600   6
   3   0  -5 4115.10 262.349   2
   3   0  -5 4326.50 394.314   6
  -3   0   4 1985.67 243.372   6
   3   0  -4 1760.26 156.003   2
   3   0  -4 1860.49 255.148   6
   3   0  -3 11169.4 405.520   2
  -3   0   3 12559.3 590.218   6
   3   0  -3 10445.8 613.110   6
  -3   0   2 36860.5 1148.63   6
   3   0  -2 30726.1 842.379   2
  -3   0   2 32860.1 858.466   2
   3   0  -1 247.479 47.4521   2
  -3   0   1 279.276 51.0207   2
   3   0   0 32101.5 890.285   4
   3   0   0 30395.8 727.528   2
  -3   0   0 34005.4 743.106   2
   3   0   1 4723.98 167.227   2
   3   0   1 5178.06 324.327   4
  -3   0  -1 4585.66 259.041   4
   3   0   1 4668.53 353.675   1
  -3   0  -1 5376.21 172.957   2
   3   0   2 2142.69 289.264   4
  -3   0  -2 2709.85 284.333   1
   3   0   2 2597.42 278.015   1
  -3   0  -2 2013.02 213.521   4
  -3   0  -3 8360.47 539.559   1
  -3   0  -3 9098.72 614.961   6
   3   0   3 8095.69 521.612   1
   3   0   3 3901.61 484.826   4
  -3   0  -3 8482.94 570.402   4
  -3   0  -4 21595.6 1029.21   6
   3   0   4 20452.0 899.403   1
   3   0   5 99.4905 97.3821   1
  -3   0  -5 42.8051 98.0453   6
  -3   0  -5 192.309 184.253   4
  -3   0  -6 5503.29 570.136   6
   3   0   6 3582.18 168.176   2
  -3   0  -7 2320.33 384.825   6
  -3   0  -7 1745.45 130.618   2
   3   0   7 1611.91 121.157   2
   3   0   8 29.9892 24.1552   5
  -3   0  -8 6.59266 122.685   6
   3   0   8 39.4055 32.1411   2
  -3   0  -8-22.4205 35.1543   2
  -3   0  -9 3897.77 249.673   2
   3   0   9 3927.08 190.681   5
  -3   0  -9 5124.86 647.993   6
   3   0   9 3878.07 239.587   2
  -3   0 -10 7445.61 393.055   2
  -3   0 -10 9366.14 935.551   6
  -3   0 -11 4142.67 661.277   6
  -3   0 -12-10.7468 117.560   6
  -3   0 -13 4662.85 756.000   6
  -3   0 -14 649.899 316.962   6
  -3   0 -15 1329.42 495.280   6
  -3   0 -16 2186.49 638.166   6
  -3   0 -17 542.448 399.780   6
   3   1 -18 88.7058 113.686   2
   3   1 -17 1930.89 374.006   2
   3   1 -17 1929.44 543.245   6
   3   1 -16 2644.50 613.596   6
   3   1 -16 2432.08 394.569   2
   3   1 -15-15.9801 68.5508   2
   3   1 -15-68.2335 149.767   6
   3   1 -14 1179.21 248.066   2
   3   1 -14 1294.97 400.682   6
   3   1 -13 1545.12 382.904   6
   3   1 -13 1558.00 264.378   2
   3   1 -12 36.5712 67.0189   2
   3   1 -12-87.4502 96.5080   6
   3   1 -11 224.473 135.520   6
   3   1 -11 285.052 107.800   2
   3   1 -10 533.770 191.462   6
   3   1 -10 606.360 148.215   2
   3   1  -9 324.991 94.9288   2
   3   1  -9 214.796 33.5438   5
   3   1  -9 293.284 142.856   6
   3   1  -8 4941.71 223.548   5
   3   1  -8 5581.76 542.445   6
   3   1  -8 5536.14 363.421   2
   3   1  -7 8093.97 418.967   2
   3   1  -7 8219.03 619.735   6
   3   1  -7 6920.44 273.808   5
   3   1  -6 1811.49 272.250   6
   3   1  -6 1717.84 176.349   2
   3   1  -6 1797.39 129.554   5
  -3  -1   5 3367.79 348.805   6
   3   1  -5 4528.09 224.577   5
   3   1  -5 3751.16 253.692   2
   3   1  -5 3561.27 351.430   6
  -3  -1   4 15269.1 683.796   6
   3   1  -4 14644.0 677.157   6
   3   1  -4 13951.9 510.640   2
  -3  -1   3 11520.3 518.057   6
   3   1  -3 11518.2 419.969   2
   3   1  -3 11183.6 537.044   6
  -3  -1   2 8160.92 379.502   6
   3   1  -2 7030.89 419.715   6
   3   1  -2 8259.56 313.806   2
  -3  -1   2 7509.44 344.761   2
  -3  -1   1 10360.9 395.020   2
  -3  -1   1 10253.1 458.449   6
   3   1  -1 10949.5 347.886   2
   3   1   0 824.228 72.7908   2
  -3  -1   0 753.394 82.7215   2
  -3  -1  -1 61042.3 1359.14   2
   3   1   1 64992.0 1304.81   2
   3   1   1 61575.8 1665.16   1
   3   1   1 59987.9 1355.92   4
   3   1   2 11971.4 317.195   2
  -3  -1  -2 13162.1 611.928   6
   3   1   2 12566.9 620.541   1
  -3  -1  -2 12108.2 597.607   1
   3   1   3 14643.5 707.747   1
  -3  -1  -3 15485.2 732.039   6
  -3  -1  -3 15406.0 711.852   1
  -3  -1  -3 12919.4 567.436   4
  -3  -1  -4 4402.73 435.172   4
  -3  -1  -4 8400.00 568.805   6
   3   1   4 8257.34 526.677   1
  -3  -1  -5 22954.2 1032.46   6
  -3  -1  -5 15996.9 953.125   4
   3   1   5 21168.9 914.268   1
   3   1   6 7779.44 231.497   2
   3   1   6 11497.0 375.642   5
   3   1   6 9181.98 636.067   1
  -3  -1  -6 9330.48 709.727   6
  -3  -1  -7 5215.42 552.190   6
   3   1   7 4675.93 215.417   5
   3   1   7 3670.22 162.901   2
  -3  -1  -8 2232.68 396.430   6
   3   1   8 2261.03 147.106   5
   3   1   8 1762.37 128.727   2
   3   1   9 1693.10 123.562   5
   3   1   9 1347.68 128.126   2
  -3  -1  -9 2237.89 426.323   6
  -3  -1 -10 547.232 219.602   6
   3   1  10 264.947 38.7158   5
  -3  -1 -11 2773.53 509.174   6
  -3  -1 -12 4582.26 701.598   6
  -3  -1 -13 20.7202 127.747   6
  -3  -1 -14 3544.04 381.848   3
  -3  -1 -14 3980.78 711.967   6
  -3  -1 -15 4305.20 764.231   6
  -3  -1 -16 1102.88 416.252   6
  -3  -1 -17 272.438 206.473   6
   3   2 -17 835.742 364.170   6
   3   2 -17 671.280 226.545   2
   3   2 -16 468.469 228.083   2
   3   2 -16 220.886 246.633   6
   3   2 -15 2582.45 384.406   2
   3   2 -15 3219.54 649.106   6
   3   2 -14 5053.73 742.547   6
   3   2 -14 4632.34 486.973   2
   3   2 -13 283.814 228.100   6
   3   2 -13 25.9903 68.8259   2
   3   2 -12 1303.77 345.086   6
   3   2 -12 1141.65 211.842   2
   3   2 -11 2129.13 409.809   6
   3   2 -11 1504.52 228.367   2
   3   2 -10 935.927 264.055   6
   3   2 -10 1311.76 202.969   2
   3   2  -9 468.571 169.505   6
   3   2  -9 451.111 110.203   2
   3   2  -9 353.620 64.0038   5
   3   2  -8 1747.49 204.638   2
   3   2  -8 1454.14 114.210   5
   3   2  -8 1957.13 328.947   6
   3   2  -7 27.8930 87.6589   6
   3   2  -7 25.0473 36.1547   2
   3   2  -7 33.8962 27.7227   5
   3   2  -6 5232.02 462.090   6
   3   2  -6 4458.39 223.682   5
   3   2  -6 4996.48 318.685   2
  -3  -2   5 9738.37 595.979   6
   3   2  -5 11066.4 622.807   6
   3   2  -5 10014.7 364.370   5
   3   2  -5 11609.4 477.204   2
  -3  -2   4 2690.29 273.320   6
   3   2  -4 2905.63 212.428   2
   3   2  -4 2391.82 154.984   5
   3   2  -4 2801.64 268.743   6
   3   2  -3 47.5596 35.4274   2
   3   2  -3 37.8944 49.8165   6
  -3  -2   3 36.4795 50.7417   6
   3   2  -3 21.9865 23.7971   5
  -3  -2   2 26736.6 761.606   6
  -3  -2   2 28061.0 832.620   2
   3   2  -2 28308.2 721.708   5
   3   2  -2 24349.0 763.857   2
   3   2  -2 29064.3 797.970   6
   3   2  -1 7904.33 308.099   5
   3   2  -1 7098.96 334.344   2
  -3  -2   1 7255.46 354.364   2
  -3  -2   0 200.319 57.2178   2
   3   2   0 350.951 66.2469   5
   3   2   0 289.049 59.6007   2
   3   2   1 500.264 69.0825   2
   3   2   1 511.652 77.7403   5
  -3  -2  -1 488.231 79.2671   6
   3   2   2 2974.32 275.339   1
   3   2   2 3017.14 184.599   5
  -3  -2  -2 2841.53 221.121   6
   3   2   3 3647.97 327.811   6
   3   2   3 3969.76 342.897   1
  -3  -2  -3 3739.95 315.883   1
  -3  -2  -3 4105.09 327.444   6
   3   2   3 4329.39 217.444   5
  -3  -2  -4 1969.01 254.985   6
  -3  -2  -4 2079.25 245.133   1
   3   2   4 2045.65 144.607   5
   3   2   4 2041.01 249.720   1
   3   2   4 1973.16 260.557   6
   3   2   5 9575.67 352.808   5
  -3  -2  -5 10484.2 668.494   6
   3   2   5 9928.02 596.137   1
   3   2   6 544.351 73.8368   5
  -3  -2  -6 741.710 188.816   6
   3   2   6 576.494 63.0780   2
   3   2   6 734.414 172.324   1
   3   2   7 20443.7 576.782   5
   3   2   7 18149.8 491.580   2
  -3  -2  -7 19905.0 1100.02   6
  -3  -2  -8 1101.70 263.957   6
   3   2   8 936.657 97.4774   5
   3   2   8 856.090 82.3821   2
   3   2   9 81.8010 25.7797   5
  -3  -2  -9 319.840 146.832   6
   3   2   9 189.582 43.7312   2
  -3  -2 -10 1759.74 375.101   6
   3   2  10 1482.03 122.148   5
  -3  -2 -11 3990.09 589.901   6
  -3  -2 -12 521.605 223.944   6
  -3  -2 -13 2218.16 295.917   3
  -3  -2 -13 3054.61 573.422   6
  -3  -2 -14 2591.99 327.780   3
  -3  -2 -14 3135.89 606.829   6
  -3  -2 -15 178.636 151.280   6
  -3  -2 -16 1700.15 496.984   6
  -3  -2 -17 2075.19 558.398   6
   3   3 -17 206.190 266.140   6
   3   3 -17 78.7041 69.0759   2
   3   3 -16 847.749 355.656   6
   3   3 -16 860.351 252.190   2
   3   3 -15 1687.63 488.612   6
   3   3 -15 1105.25 265.565   2
   3   3 -14 420.413 301.948   6
   3   3 -14 156.249 98.1887   2
   3   3 -13 4502.01 680.320   6
   3   3 -13 4832.09 464.532   2
   3   3 -12 2613.29 499.687   6
   3   3 -12 2788.82 336.593   2
   3   3 -11 1132.76 314.082   6
   3   3 -11 848.866 178.677   2
   3   3 -10 3939.00 544.691   6
   3   3 -10 3377.14 326.344   2
   3   3  -9 4000.98 342.280   2
   3   3  -9 4999.30 573.780   6
   3   3  -8 434.475 84.8758   5
   3   3  -8 137.205 51.8816   2
   3   3  -8 122.640 99.7012   6
   3   3  -7 3776.58 212.163   5
   3   3  -7 4441.90 325.045   2
   3   3  -7 5011.94 491.743   6
   3   3  -6 1263.54 117.242   5
   3   3  -6 1503.59 178.888   2
   3   3  -6 1428.37 243.731   6
  -3  -3   5 454.891 147.170   6
   3   3  -5 505.473 95.0976   2
   3   3  -5 298.267 50.4129   5
   3   3  -5 665.831 170.351   6
  -3  -3   4 5194.83 387.588   6
   3   3  -4 5265.63 257.771   5
   3   3  -4 5723.18 344.276   2
   3   3  -4 6303.36 420.807   6
  -3  -3   3 15949.7 446.253   3
   3   3  -3 16829.8 626.392   6
  -3  -3   3 14761.2 609.307   6
   3   3  -3 15108.3 497.333   5
   3   3  -3 15411.5 618.439   2
   3   3  -2 7571.21 327.706   6
  -3  -3   2 9196.52 352.702   5
   3   3  -2 7639.24 397.494   2
   3   3  -2 6745.97 304.543   5
   3   3  -1 4101.92 229.401   5
   3   3  -1 5054.37 298.241   2
  -3  -3   1 6125.52 288.681   5
  -3  -3   0 10651.8 398.535   5
   3   3   0 7735.70 333.178   5
   3   3   0 9201.31 422.073   2
  -3  -3  -1 63.7889 38.1499   5
   3   3   1 16.1008 60.4678   4
   3   3   1 64.5023 42.8884   5
   3   3   2 13172.6 520.947   6
  -3  -3  -2 13984.7 497.392   6
   3   3   2 13211.3 463.248   5
  -3  -3  -2 17114.1 526.152   5
   3   3   2 14071.2 584.376   4
   3   3   3 25523.7 721.785   5
   3   3   3 24291.5 889.040   6
   3   3   3 29686.8 1005.88   1
  -3  -3  -3 26464.8 876.747   6
   3   3   4 15826.7 730.467   1
  -3  -3  -4 14696.3 695.259   6
  -3  -3  -4 18934.9 552.753   5
   3   3   4 15764.0 501.359   5
  -3  -3  -4 15760.9 674.964   1
  -3  -3  -4 11602.1 415.633   4
   3   3   4 14702.4 715.027   6
  -3  -3  -5 1163.68 185.512   1
  -3  -3  -5 1336.92 126.869   5
   3   3   5 1123.08 113.364   5
   3   3   5 1260.01 196.733   1
  -3  -3  -5 1319.87 221.369   6
   3   3   6 21740.4 948.085   1
   3   3   6 21485.4 634.780   5
  -3  -3  -6 23114.4 1051.29   6
   3   3   7 8233.48 339.676   2
   3   3   7 8777.12 606.724   1
   3   3   7 8817.06 351.556   5
  -3  -3  -7 9189.45 692.904   6
  -3  -3  -8 879.809 250.872   6
   3   3   8 606.498 84.5389   2
   3   3   8 484.030 71.4146   5
   3   3   9 3190.12 198.621   5
  -3  -3  -9 3248.93 464.728   6
   3   3  10 1925.87 158.606   5
  -3  -3 -10 1994.83 382.257   6
  -3  -3 -11 265.049 209.703   6
  -3  -3 -11-41.1146 101.297   3
  -3  -3 -12 6343.22 484.613   3
  -3  -3 -12 6283.19 748.437   6
  -3  -3 -13 4465.83 670.271   6
  -3  -3 -13 4698.51 441.308   3
  -3  -3 -14-28.0718 102.839   6
  -3  -3 -14-30.8155 90.0615   3
  -3  -3 -15 2214.55 535.847   6
  -3  -3 -15 2151.08 324.215   3
  -3  -3 -16 2165.38 548.785   6
  -3  -3 -17 251.788 270.456   6
  -3  -3 -18 1014.25 411.052   6
   3   4 -16 307.854 158.681   2
   3   4 -15 268.883 275.122   6
   3   4 -15 364.491 143.186   2
   3   4 -14 854.051 207.470   2
   3   4 -14 647.702 330.808   6
   3   4 -13 1888.87 288.288   2
   3   4 -13 1913.54 459.635   6
   3   4 -12 24.8585 107.747   6
   3   4 -12 40.6423 55.5075   2
   3   4 -11 3917.75 386.046   2
   3   4 -11 4354.44 629.216   6
   3   4 -10 1229.74 204.223   2
   3   4 -10 1379.84 332.104   6
   3   4  -9 141.567 100.115   6
   3   4  -9 26.6360 47.4497   2
   3   4  -8 4033.37 499.721   6
   3   4  -8 3602.53 322.957   2
   3   4  -7 5716.74 385.903   2
   3   4  -7 5676.33 547.122   6
   3   4  -6 23.8198 40.1116   2
   3   4  -6-31.2448 59.1226   6
   3   4  -5 5254.04 373.552   2
   3   4  -5 6067.92 490.305   6
   3   4  -4 5065.96 410.175   6
  -3  -4   4 7645.71 374.633   5
   3   4  -4 5324.38 386.327   2
  -3  -4   3 1638.40 148.293   5
   3   4  -3 1384.35 181.135   6
   3   4  -3 1468.81 189.338   2
   3   4  -2 9892.66 426.683   6
  -3  -4   2 9210.27 373.426   3
  -3  -4   2 9603.92 388.179   5
   3   4  -2 9749.97 501.310   2
  -3  -4   1 16979.3 548.051   5
   3   4  -1 15534.9 480.470   6
  -3  -4   1 16401.9 542.563   3
   3   4  -1 17045.4 673.432   2
   3   4   0 7993.04 445.365   2
  -3  -4   0 8477.98 354.931   5
  -3  -4   0 7991.67 359.292   3
  -3  -4  -1 323.458 68.1292   5
   3   4   1 184.380 140.109   4
   3   4   1 226.118 52.2190   6
  -3  -4  -1 249.877 60.2233   3
   3   4   2 14641.8 541.107   6
  -3  -4  -2 14886.3 510.298   5
  -3  -4  -2 13274.2 784.550   4
   3   4   2 15895.4 797.497   4
  -3  -4  -2 14632.9 531.527   6
  -3  -4  -3 6793.10 320.513   5
   3   4   3 7599.51 447.254   1
  -3  -4  -3 5254.07 430.482   4
   3   4   3 8251.63 374.602   4
   3   4   3 7447.82 424.373   6
  -3  -4  -3 6447.52 371.529   6
  -3  -4  -4 327.522 90.2594   4
   3   4   4 265.451 105.061   1
   3   4   4 260.100 125.839   6
  -3  -4  -4 254.271 60.1569   5
  -3  -4  -4 264.091 108.790   6
  -3  -4  -5 5828.14 310.838   4
  -3  -4  -5 5503.33 382.379   1
  -3  -4  -5 5559.40 282.816   5
  -3  -4  -5 6068.92 447.669   6
   3   4   5 6165.91 438.506   1
  -3  -4  -6 4639.86 380.635   1
  -3  -4  -6 5310.31 459.641   6
  -3  -4  -6 4781.14 288.404   4
   3   4   6 4843.23 400.231   1
  -3  -4  -6 4834.82 262.370   5
  -3  -4  -7 1819.09 273.886   6
  -3  -4  -7 2060.40 169.143   5
   3   4   7 1876.66 259.869   1
  -3  -4  -8 12178.0 454.203   5
  -3  -4  -8 11074.2 589.773   3
  -3  -4  -8 11085.9 783.267   6
  -3  -4  -9 3359.62 451.928   6
  -3  -4  -9 3245.98 315.310   3
  -3  -4 -10 92.8755 118.186   6
  -3  -4 -10 51.5930 82.4225   3
  -3  -4 -11 1399.96 221.375   3
  -3  -4 -11 1563.71 349.033   6
  -3  -4 -12 902.231 277.374   6
  -3  -4 -12 640.980 147.783   3
  -3  -4 -13 28.3837 123.114   6
  -3  -4 -13-62.6962 118.633   3
  -3  -4 -14 1967.02 459.423   6
  -3  -4 -14 2550.11 353.398   3
  -3  -4 -15 1280.51 389.816   6
  -3  -4 -15 1411.95 274.958   3
  -3  -4 -16 94.1333 218.279   6
  -3  -4 -17 1680.42 506.300   6
  -3  -4 -18 1882.03 559.551   6
   3   5 -16 1284.29 304.750   2
   3   5 -15 1441.23 294.008   2
   3   5 -14 313.108 271.502   6
   3   5 -14 269.046 143.145   2
   3   5 -13 0.71887 201.067   6
   3   5 -13 56.3509 82.8902   2
   3   5 -12 2332.52 482.013   6
   3   5 -12 2084.80 298.155   2
   3   5 -11 2731.06 329.471   2
   3   5 -11 2942.16 528.696   6
   3   5 -10 564.358 145.182   2
   3   5 -10 555.164 233.230   6
   3   5  -9 6523.86 474.076   2
   3   5  -9 7132.52 745.858   6
   3   5  -8 12999.0 947.122   6
   3   5  -8 12697.3 649.851   2
   3   5  -7 317.642 160.255   6
   3   5  -7 313.239 98.3338   2
  -3  -5   6 9947.24 435.611   5
   3   5  -6 7787.67 651.807   6
   3   5  -6 6903.33 481.535   2
   3   5  -5 6373.13 535.338   6
  -3  -5   5 6487.63 336.611   5
   3   5  -5 5909.36 444.388   2
   3   5  -4 1087.04 211.074   6
  -3  -5   4 995.352 126.323   5
   3   5  -4 905.195 168.145   2
  -3  -5   3 4479.10 269.744   5
   3   5  -3 5119.49 387.480   2
   3   5  -3 4811.38 376.993   6
   3   5  -2 13385.2 594.481   6
  -3  -5   2 13676.7 519.254   5
   3   5  -2 13975.8 671.135   2
   3   5  -1 945.706 160.181   2
  -3  -5   1 980.890 125.960   5
  -3  -5   0 6369.58 331.486   5
   3   5   0 2920.81 515.092   4
  -3  -5   0 5762.32 334.513   3
  -3  -5  -1 4925.44 290.210   5
  -3  -5  -1 4695.78 306.802   3
  -3  -5  -1 2799.65 478.543   4
   3   5   1 3253.97 481.621   4
   3   5   1 5112.46 276.876   6
  -3  -5  -2 2822.13 211.222   5
  -3  -5  -2 2505.50 226.881   3
   3   5   2 2572.10 377.229   4
  -3  -5  -2 1354.37 313.717   4
   3   5   2 2627.21 217.810   6
  -3  -5  -3 1830.11 173.974   5
  -3  -5  -3 1570.11 187.287   3
  -3  -5  -3 1567.43 200.497   6
   3   5   3 2276.03 272.167   4
  -3  -5  -3 1353.87 279.140   4
   3   5   3 1777.46 208.752   6
  -3  -5  -4 11907.3 481.884   5
  -3  -5  -4 11584.2 719.877   4
   3   5   4 13206.3 626.636   1
  -3  -5  -4 10819.2 535.504   3
  -3  -5  -4 10325.0 565.526   6
   3   5   4 13738.8 551.093   4
   3   5   4 11923.6 632.462   6
  -3  -5  -5 4830.09 356.257   3
   3   5   5 5703.35 412.090   1
  -3  -5  -5 5835.19 314.994   5
  -3  -5  -5 4648.12 395.567   6
  -3  -5  -5 5312.70 398.408   4
  -3  -5  -6 533.644 104.717   4
  -3  -5  -6 511.707 108.482   1
  -3  -5  -6 406.514 105.792   3
  -3  -5  -6 529.558 94.2731   5
   3   5   6 600.265 141.434   1
  -3  -5  -6 630.990 161.385   6
  -3  -5  -7 4627.47 332.511   4
  -3  -5  -7 4444.15 368.802   1
  -3  -5  -7 4432.08 268.869   5
  -3  -5  -7 4561.01 366.977   3
   3   5   7 4512.14 392.273   1
  -3  -5  -7 4313.25 438.481   6
  -3  -5  -8 134.545 110.973   6
  -3  -5  -8 232.219 81.3639   4
  -3  -5  -8 216.364 56.2247   5
  -3  -5  -8 194.868 69.2033   3
  -3  -5  -9 1076.32 248.122   6
  -3  -5  -9 1074.91 125.076   5
  -3  -5  -9 858.376 181.334   3
  -3  -5 -10 1770.99 340.128   6
  -3  -5 -10 1606.43 241.298   3
  -3  -5 -10 2045.12 184.978   5
  -3  -5 -11 1831.90 365.008   6
  -3  -5 -11 2011.60 280.082   3
  -3  -5 -12 283.642 140.969   6
  -3  -5 -12 296.904 122.836   3
  -3  -5 -13 5583.92 508.595   3
  -3  -5 -13 5335.08 680.993   6
  -3  -5 -14 1728.99 299.578   3
  -3  -5 -14 1221.99 368.191   6
  -3  -5 -15 104.947 94.4682   6
  -3  -5 -15 395.966 190.066   3
  -3  -5 -16 1325.94 422.664   6
  -3  -5 -16 2034.08 362.346   3
  -3  -5 -17 2080.79 524.447   6
  -3  -5 -18 248.344 267.137   6
   3   6 -15 329.480 172.717   2
   3   6 -14 656.315 204.766   2
   3   6 -13 2735.03 375.289   2
   3   6 -13 3028.85 615.714   6
   3   6 -12 1138.35 341.866   6
   3   6 -12 966.887 217.227   2
   3   6 -11 723.132 336.312   6
   3   6 -11-8.52082 69.8204   2
   3   6 -10 3654.17 572.114   6
   3   6 -10 3260.66 354.434   2
   3   6  -9 1897.11 263.403   2
   3   6  -9 1744.06 412.219   6
   3   6  -8-4.30529 57.4840   2
   3   6  -8 41.3414 123.295   6
  -3  -6   7 2626.02 229.436   5
   3   6  -7 1587.80 239.201   2
   3   6  -7 2210.85 408.592   6
   3   6  -6 5643.85 581.047   6
  -3  -6   6 5218.27 314.561   5
   3   6  -6 5181.09 447.737   2
   3   6  -5 51.5320 97.5260   6
  -3  -6   5 83.0531 45.3849   5
   3   6  -4 6951.79 544.802   6
   3   6  -4 7174.00 510.172   2
  -3  -6   4 7034.81 375.510   5
   3   6  -3 2138.24 276.848   6
   3   6  -3 2237.56 270.158   2
  -3  -6   3 2342.98 213.720   5
  -3  -6   2 2050.50 205.468   5
   3   6  -2 1770.83 252.482   2
   3   6  -2 1723.93 237.746   6
  -3  -6   1 14659.6 585.923   5
  -3  -6   0 6812.21 382.978   5
  -3  -6  -1-0.95736 41.0644   5
  -3  -6  -1 0.98137 204.635   4
  -3  -6  -1 59.1503 82.8158   3
   3   6   1 58.4841 80.9860   6
   3   6   2 9791.01 832.747   4
  -3  -6  -2 6455.36 802.962   4
  -3  -6  -2 10156.0 523.288   3
  -3  -6  -2 11392.3 494.677   5
   3   6   2 11611.5 548.728   6
  -3  -6  -3 7667.03 556.561   6
  -3  -6  -3 11923.0 578.509   3
   3   6   3 14048.7 856.668   4
  -3  -6  -3 13172.7 535.176   5
  -3  -6  -3 9866.02 887.777   4
   3   6   3 13131.3 617.406   6
   3   6   4 5984.74 461.802   6
  -3  -6  -4 5023.81 412.039   6
  -3  -6  -4 5321.90 387.458   3
   3   6   4 6072.50 402.538   1
  -3  -6  -4 5540.96 581.668   4
   3   6   4 6903.97 470.151   4
  -3  -6  -4 5858.43 343.275   5
   3   6   5 947.940 153.613   4
  -3  -6  -5 889.703 152.260   3
   3   6   5 968.446 159.293   1
  -3  -6  -5 918.884 190.813   6
  -3  -6  -5 994.661 138.434   5
  -3  -6  -5 1123.03 231.357   4
  -3  -6  -6 6016.42 439.060   3
  -3  -6  -6 5400.38 472.449   6
  -3  -6  -6 7370.19 516.438   4
  -3  -6  -6 6802.53 375.753   5
   3   6   6 6803.63 440.597   1
  -3  -6  -7 1489.10 218.606   3
  -3  -6  -7 1545.61 174.743   5
  -3  -6  -7 1370.51 251.494   6
   3   6   7 1343.92 201.372   1
  -3  -6  -7 1632.86 228.048   4
  -3  -6  -8 1614.79 223.071   1
  -3  -6  -8 1609.89 241.987   3
  -3  -6  -8 1869.99 185.240   5
  -3  -6  -8 1747.61 230.871   4
  -3  -6  -8 1801.84 304.055   6
  -3  -6  -9 3299.37 434.425   6
  -3  -6  -9 3598.66 254.383   5
  -3  -6  -9 3409.66 354.484   3
  -3  -6  -9 3263.70 323.251   4
  -3  -6 -10 2281.72 284.424   4
  -3  -6 -10 2711.30 326.389   3
  -3  -6 -10 2503.96 206.355   5
  -3  -6 -10 2364.48 388.848   6
  -3  -6 -11 729.384 166.746   4
  -3  -6 -11 702.934 176.194   3
  -3  -6 -11 869.919 276.900   6
  -3  -6 -11 801.949 117.983   5
  -3  -6 -12 7532.45 594.509   3
  -3  -6 -12 8352.70 401.957   5
  -3  -6 -12 6834.14 746.285   6
  -3  -6 -13 3121.82 400.180   3
  -3  -6 -13 2620.76 479.541   6
  -3  -6 -14 964.334 311.093   6
  -3  -6 -14 1254.77 270.969   3
  -3  -6 -15 4139.49 488.896   3
  -3  -6 -15 3354.87 612.220   6
  -3  -6 -16 1393.32 421.544   6
  -3  -6 -17 40.9479 171.367   6
  -3  -6 -18 1041.62 380.458   6
   3   7 -14 1465.88 290.623   2
   3   7 -13 117.459 106.923   2
   3   7 -12 562.894 171.342   2
   3   7 -11 2038.93 475.165   6
   3   7 -11 2352.96 331.497   2
   3   7 -10 407.661 255.230   6
   3   7 -10 425.283 154.929   2
   3   7  -9 836.701 301.545   6
   3   7  -9 933.289 194.937   2
  -3  -7   8 1151.78 159.797   5
   3   7  -8 1123.13 320.705   6
   3   7  -8 989.751 194.868   2
   3   7  -7 378.239 193.259   6
   3   7  -7 74.9318 70.1209   2
  -3  -7   7 160.419 65.5893   5
  -3  -7   6 1352.39 171.378   5
   3   7  -6 1477.50 325.335   6
   3   7  -6 1754.15 285.554   2
   3   7  -5 6696.12 619.283   6
   3   7  -5 6320.80 524.309   2
  -3  -7   5 6228.51 372.469   5
   3   7  -4 5234.09 512.228   6
   3   7  -4 5500.05 467.773   2
  -3  -7   4 5085.80 339.727   5
   3   7  -3 3333.53 383.648   6
  -3  -7   3 3692.32 293.298   5
   3   7  -3 3627.52 386.209   2
   3   7  -2 11760.8 726.072   2
  -3  -7   2 12084.9 557.490   5
  -3  -7   1 19235.1 733.941   5
  -3  -7   0 2087.00 213.760   5
  -3  -7   0 698.722 329.747   4
  -3  -7  -1 8570.16 452.892   5
  -3  -7  -1 5287.29 840.507   4
   3   7   1 7708.31 565.445   6
   3   7   2 5909.04 452.151   6
  -3  -7  -2 2903.75 607.065   4
  -3  -7  -2 5250.90 341.410   5
  -3  -7  -3 101.569 105.393   3
  -3  -7  -3-52.7510 85.0445   5
  -3  -7  -3-61.6778 118.287   4
   3   7   3 32.9474 82.9582   6
  -3  -7  -4 4823.83 482.584   6
  -3  -7  -4 7456.50 486.037   3
  -3  -7  -4 8043.98 431.781   5
  -3  -7  -4 6574.59 744.239   4
  -3  -7  -5 13418.4 811.134   6
  -3  -7  -5 14582.9 729.614   3
  -3  -7  -5 15101.0 1039.08   4
   3   7   5 19151.9 872.403   4
  -3  -7  -5 16411.6 657.445   5
   3   7   5 17928.4 739.506   1
   3   7   6 824.126 161.153   4
  -3  -7  -6 543.019 153.114   3
   3   7   6 572.659 123.028   1
  -3  -7  -6 417.859 151.376   6
  -3  -7  -6 547.321 105.752   5
  -3  -7  -6 475.200 160.061   4
  -3  -7  -7 7553.52 423.336   5
  -3  -7  -7 8894.44 629.570   4
   3   7   7 6989.90 435.282   1
  -3  -7  -7 6134.54 545.801   6
  -3  -7  -7 7192.57 508.643   3
  -3  -7  -8 6629.56 395.596   5
  -3  -7  -8 6341.16 495.336   3
  -3  -7  -8 5542.61 548.492   6
  -3  -7  -8 5957.63 482.835   4
  -3  -7  -9 98.8926 49.1669   4
  -3  -7  -9 142.863 96.4879   1
  -3  -7  -9 107.978 58.5132   5
  -3  -7  -9 252.696 131.632   3
  -3  -7  -9 46.2322 82.7641   6
  -3  -7 -10 2888.25 437.965   6
  -3  -7 -10 3540.34 276.420   5
  -3  -7 -10 3130.23 350.108   4
  -3  -7 -10 3620.77 388.702   3
  -3  -7 -11 9897.80 671.555   3
  -3  -7 -11 9183.41 449.752   5
  -3  -7 -11 7913.78 588.386   4
  -3  -7 -11 8866.17 813.217   6
  -3  -7 -12 2686.75 351.270   4
  -3  -7 -12 4570.69 469.687   3
  -3  -7 -12 3873.32 271.552   5
  -3  -7 -12 3512.22 537.920   6
  -3  -7 -13 1732.19 387.787   6
  -3  -7 -13 1814.73 299.816   4
  -3  -7 -13 2691.63 376.280   3
  -3  -7 -13 3022.49 256.867   5
  -3  -7 -14 3208.94 408.496   4
  -3  -7 -14 4333.10 492.612   3
  -3  -7 -14 3981.32 626.646   6
  -3  -7 -15 404.388 164.556   4
  -3  -7 -15 565.235 249.854   6
  -3  -7 -16 426.276 225.789   6
  -3  -7 -16 244.812 156.317   4
  -3  -7 -17 3073.79 631.375   6
  -3  -7 -18 1864.15 507.827   6
   3   8 -14-119.011 108.059   2
   3   8 -13 469.500 156.697   2
   3   8 -12 2184.44 353.220   2
   3   8 -11 621.529 181.124   2
   3   8 -10 920.662 354.185   6
   3   8 -10 735.769 185.860   2
   3   8  -9 2656.56 531.944   6
   3   8  -9 2750.30 345.651   2
   3   8  -8 58.3511 166.898   6
   3   8  -8 45.9345 89.6760   2
   3   8  -7 2008.78 403.033   6
  -3  -8   7 1904.33 207.199   5
   3   8  -7 1896.09 309.922   2
  -3  -8   6 3226.12 277.205   5
   3   8  -6 3598.30 504.377   6
   3   8  -6 3242.01 400.315   2
   3   8  -5 3581.02 410.080   2
   3   8  -5 3513.65 478.735   6
  -3  -8   5 3473.01 301.249   5
   3   8  -4 154.720 133.519   6
  -3  -8   4 102.050 69.8932   5
   3   8  -4 188.537 137.765   2
   3   8  -3 3332.01 427.247   6
  -3  -8   3 3532.60 305.759   5
   3   8  -3 4033.45 424.878   2
  -3  -8   2 2278.87 237.352   5
   3   8  -2 2094.12 319.366   2
  -3  -8   1-61.7157 91.6496   5
  -3  -8   0 5513.39 379.016   5
  -3  -8   0 2780.29 699.832   4
  -3  -8  -1 25424.2 874.069   5
   3   8   1 17558.0 1015.28   6
  -3  -8  -2 34.2607 55.3237   5
   3   8   2 125.237 100.100   6
  -3  -8  -2 257.704 265.903   4
  -3  -8  -3 4875.04 348.475   5
  -3  -8  -3 2776.61 612.928   4
  -3  -8  -4 212.757 53.1203   5
  -3  -8  -4 283.260 196.027   4
  -3  -8  -5 982.163 245.148   6
  -3  -8  -5 1854.39 210.078   5
   3   8   5 2317.48 247.519   1
  -3  -8  -5 1955.68 417.155   4
  -3  -8  -6 9137.90 493.421   5
  -3  -8  -6 8284.38 571.079   3
   3   8   6 9137.32 489.631   1
  -3  -8  -6 9034.90 837.775   4
  -3  -8  -6 6979.53 625.595   6
  -3  -8  -7 5821.05 389.666   5
  -3  -8  -7 5376.24 593.462   4
  -3  -8  -7 5200.72 531.864   6
   3   8   7 5707.14 363.210   1
  -3  -8  -7 5748.74 477.634   3
  -3  -8  -8 345.673 95.2304   5
  -3  -8  -8 410.203 171.309   3
  -3  -8  -8 312.010 173.494   6
  -3  -8  -8 482.709 172.500   4
  -3  -8  -9 4103.17 325.103   5
  -3  -8  -9 4027.97 412.446   3
  -3  -8  -9 3687.73 476.691   6
  -3  -8  -9 3804.11 420.670   4
  -3  -8 -10 2178.60 320.006   3
  -3  -8 -10 2221.30 237.601   5
  -3  -8 -10 2062.44 376.076   6
  -3  -8 -10 1955.99 303.951   4
  -3  -8 -11 120.103 78.4158   4
  -3  -8 -11 69.8557 109.766   6
  -3  -8 -11 136.386 54.2176   5
  -3  -8 -11 340.369 185.494   3
  -3  -8 -12 1342.44 291.664   3
  -3  -8 -12 687.256 217.695   6
  -3  -8 -12 737.963 126.897   5
  -3  -8 -12 674.086 186.931   4
  -3  -8 -13 3331.81 425.147   4
  -3  -8 -13 4286.20 314.698   5
  -3  -8 -13 4157.22 611.829   6
  -3  -8 -14 641.669 188.272   4
  -3  -8 -14 112.804 111.663   6
  -3  -8 -15 575.458 211.776   4
  -3  -8 -15 1075.26 338.469   6
  -3  -8 -16 534.955 189.225   4
  -3  -8 -16 1106.09 381.507   6
  -3  -8 -17 1386.64 447.488   6
  -3  -8 -18 412.398 256.122   6
   3   9 -13 1418.18 294.989   2
   3   9 -12 143.203 96.4630   2
   3   9 -11 1750.02 311.332   2
   3   9 -10 3388.20 416.733   2
   3   9  -9 419.268 166.724   2
   3   9  -8 505.731 272.424   6
   3   9  -8 490.361 162.636   2
  -3  -9   7 6634.28 431.862   5
   3   9  -7 6736.93 769.556   6
   3   9  -7 6450.60 612.616   2
   3   9  -6 2228.43 425.547   6
  -3  -9   6 2329.20 255.644   5
   3   9  -6 2271.36 357.069   2
  -3  -9   5 2484.33 266.181   5
   3   9  -5 2785.93 374.727   2
   3   9  -5 2441.83 422.858   6
  -3  -9   4 2729.36 283.760   5
   3   9  -4 2907.41 385.918   2
   3   9  -4 2229.18 389.181   6
   3   9  -3 187.714 174.220   6
  -3  -9   3 116.218 94.8057   5
   3   9  -3 29.4995 75.5061   2
  -3  -9   2 288.794 69.3400   5
   3   9  -2 205.495 93.6046   2
  -3  -9   1 5639.34 403.845   5
  -3  -9   0 13080.7 640.797   5
  -3  -9   0 7574.32 1257.73   4
  -3  -9  -1 186.991 63.7786   5
  -3  -9  -1-133.931 184.145   4
  -3  -9  -2 11909.8 612.025   5
  -3  -9  -2 7429.97 1137.79   4
  -3  -9  -3 7219.50 455.682   5
  -3  -9  -3 4047.23 791.690   4
  -3  -9  -4 1696.79 211.034   5
  -3  -9  -4 1483.40 425.295   4
  -3  -9  -5 3204.90 299.277   5
  -3  -9  -5 2705.74 569.279   4
  -3  -9  -6 8495.90 498.748   5
   3   9   6 8402.83 454.363   1
  -3  -9  -6 7684.99 878.245   4
  -3  -9  -6 3872.82 531.251   6
  -3  -9  -7 371.285 180.393   6
  -3  -9  -7 297.730 44.0227   5
   3   9   7 492.354 99.2108   1
  -3  -9  -7 525.530 223.315   4
  -3  -9  -8 1826.60 363.200   4
  -3  -9  -8 2033.79 218.519   5
  -3  -9  -8 1719.52 345.619   6
  -3  -9  -9 2952.03 290.788   5
  -3  -9  -9 2727.46 436.506   6
  -3  -9  -9 3050.54 453.381   4
  -3  -9 -10 222.658 111.568   4
  -3  -9 -10 201.915 179.296   6
  -3  -9 -10 150.339 78.5965   5
  -3  -9 -11 2166.65 250.615   5
  -3  -9 -11 1947.64 394.889   6
  -3  -9 -11 2052.09 336.725   4
  -3  -9 -12 4558.59 358.565   5
  -3  -9 -12 3364.60 434.976   4
  -3  -9 -12 3851.39 567.809   6
  -3  -9 -13 699.555 199.410   4
  -3  -9 -13 1082.98 175.159   5
  -3  -9 -13 890.869 291.404   6
  -3  -9 -14 954.922 315.103   6
  -3  -9 -14 527.816 182.318   4
  -3  -9 -15 964.425 260.011   4
  -3  -9 -15 1247.91 378.582   6
  -3  -9 -16 14.2342 110.653   6
  -3  -9 -17 415.272 237.882   6
  -3  -9 -18 2187.02 555.920   6
   3  10 -12 1254.30 282.846   2
   3  10 -11 582.969 168.743   2
   3  10 -10 135.643 106.008   2
   3  10  -9 945.187 242.215   2
   3  10  -8 2645.82 422.324   2
   3  10  -7 617.214 207.976   2
  -3 -10   6 3635.73 345.409   5
   3  10  -6 3749.47 483.354   2
   3  10  -6 3707.58 582.239   6
   3  10  -5 14832.0 1132.15   6
  -3 -10   5 15424.1 761.155   5
   3  10  -5 17332.5 1048.89   2
   3  10  -4 294.543 213.763   6
  -3 -10   4 447.252 150.582   5
   3  10  -4 268.223 162.759   2
   3  10  -3 6629.78 687.366   6
  -3 -10   3 5493.59 429.152   5
   3  10  -3 6211.84 615.572   2
  -3 -10   2 1865.37 234.975   5
   3  10  -2 2671.92 393.635   2
  -3 -10   1 864.426 148.988   5
  -3 -10   0 367.595 382.285   4
  -3 -10   0 247.446 52.8429   5
  -3 -10  -1 5133.96 408.103   5
  -3 -10  -1 1614.55 641.928   4
  -3 -10  -2 6143.48 451.589   5
  -3 -10  -2 3395.16 860.986   4
  -3 -10  -3 757.464 152.637   5
  -3 -10  -3 164.161 144.634   4
  -3 -10  -4 8238.47 524.448   5
  -3 -10  -4 5924.98 1011.25   4
  -3 -10  -5 5088.85 406.536   5
  -3 -10  -5 3647.56 733.086   4
   3  10   6 93.7481 55.0866   1
  -3 -10  -6-80.2200 93.4267   5
  -3 -10  -6-8.08118 145.280   4
  -3 -10  -7 4038.56 354.024   5
  -3 -10  -7 3288.21 590.353   4
  -3 -10  -7 1538.24 345.961   6
   3  10   7 3663.35 249.734   1
  -3 -10  -8 5757.59 427.602   5
  -3 -10  -8 5438.09 741.716   4
  -3 -10  -8 3476.13 513.132   6
  -3 -10  -9-128.387 123.695   5
  -3 -10  -9-97.1158 113.180   4
  -3 -10  -9-24.5437 97.8752   6
  -3 -10 -10 1712.60 364.769   4
  -3 -10 -10 2458.56 276.941   5
  -3 -10 -10 2227.48 436.168   6
  -3 -10 -11 1943.73 253.739   5
  -3 -10 -11 1893.30 358.732   4
  -3 -10 -11 1502.45 360.368   6
  -3 -10 -12-4.62895 82.3271   5
  -3 -10 -12 183.952 149.550   4
  -3 -10 -12 252.910 206.558   6
  -3 -10 -13 3774.09 347.026   5
  -3 -10 -13 3381.42 565.634   6
  -3 -10 -13 2747.74 433.617   4
  -3 -10 -14 3216.06 575.938   6
  -3 -10 -14 3611.37 329.722   5
  -3 -10 -14 2570.59 421.958   4
  -3 -10 -15 111.094 109.227   4
  -3 -10 -15 534.465 253.819   6
  -3 -10 -16 1520.92 434.874   6
  -3 -10 -17 1425.69 447.326   6
  -3 -10 -18 603.568 381.510   6
   3  11 -11 95.0226 103.710   2
   3  11 -10 2275.80 386.963   2
   3  11  -9 842.609 252.934   2
   3  11  -8 528.568 207.354   2
   3  11  -7 581.396 202.343   2
  -3 -11   6 4750.51 419.730   5
   3  11  -6 4778.52 570.572   2
   3  11  -5 87.9140 158.860   6
   3  11  -5 325.630 175.754   2
  -3 -11   5 390.092 143.698   5
   3  11  -4 3532.86 486.597   2
  -3 -11   4 3593.42 365.989   5
   3  11  -4 3285.75 533.093   6
   3  11  -3 5531.72 671.432   6
   3  11  -3 5812.06 628.983   2
  -3 -11   3 6177.06 480.741   5
  -3 -11   2-273.298 168.971   5
   3  11  -2-9.02374 106.137   2
  -3 -11   1-212.981 167.746   5
  -3 -11   0 3264.09 331.083   5
  -3 -11   0 1896.18 727.250   4
  -3 -11  -1 857.568 175.522   5
  -3 -11  -1 322.611 447.468   4
  -3 -11  -2 1793.81 243.105   5
  -3 -11  -2 824.187 474.877   4
  -3 -11  -3 3453.62 353.263   5
  -3 -11  -3 2454.31 790.445   4
  -3 -11  -4 1817.53 252.968   5
  -3 -11  -4 1111.44 497.986   4
  -3 -11  -5-33.8573 80.3428   5
  -3 -11  -5 165.415 161.994   4
   3  11   6 5985.02 385.440   1
  -3 -11  -6 6740.25 486.188   5
  -3 -11  -6 4818.80 852.529   4
  -3 -11  -7 982.763 171.569   5
  -3 -11  -7 1015.80 370.081   4
  -3 -11  -8 1427.03 210.405   5
  -3 -11  -8 1135.29 347.252   4
  -3 -11  -9 2109.11 430.007   6
  -3 -11  -9 4530.57 391.013   5
  -3 -11  -9 3713.72 632.157   4
  -3 -11 -10 3372.57 552.821   6
  -3 -11 -10 4823.84 406.565   5
  -3 -11 -10 3473.45 581.207   4
  -3 -11 -11-62.4987 118.930   4
  -3 -11 -11-100.011 69.1360   5
  -3 -11 -11 212.597 194.929   6
  -3 -11 -12 2990.03 327.274   5
  -3 -11 -12 2551.35 458.081   4
  -3 -11 -12 1785.25 433.403   6
  -3 -11 -13 3336.21 597.156   6
  -3 -11 -13 3751.77 537.462   4
  -3 -11 -13 3959.49 376.959   5
  -3 -11 -14 305.960 183.517   4
  -3 -11 -14 405.733 121.791   5
  -3 -11 -14 281.725 195.467   6
  -3 -11 -15 3499.19 634.615   6
  -3 -11 -16 1102.90 392.962   6
  -3 -11 -17 296.096 321.080   6
  -3 -11 -18 664.787 349.304   6
   3  12 -10 1344.70 315.297   2
   3  12  -9 112.398 88.5036   2
   3  12  -8 1211.31 307.406   2
   3  12  -7 824.227 254.356   2
   3  12  -6 187.225 145.052   2
  -3 -12   5 2534.00 331.878   5
   3  12  -5 3022.49 465.254   2
  -3 -12   4 5754.31 493.870   5
   3  12  -4 5876.30 660.160   2
   3  12  -3 287.166 210.014   6
  -3 -12   3 225.031 113.461   5
   3  12  -3 161.843 120.944   2
   3  12  -2 4288.20 562.759   2
  -3 -12   2 4271.12 405.960   5
  -3 -12   1 4807.97 438.648   5
  -3 -12   0-121.368 128.380   5
  -3 -12   0 273.967 434.003   4
  -3 -12  -1 1446.11 225.449   5
  -3 -12  -1 1135.91 620.163   4
  -3 -12  -2 10477.5 653.910   5
  -3 -12  -2 4175.98 1109.30   4
  -3 -12  -3-47.0106 68.4474   5
  -3 -12  -3 544.718 390.643   4
  -3 -12  -4 4754.40 429.812   5
  -3 -12  -4 2925.23 879.933   4
  -3 -12  -5 4944.44 1032.70   4
  -3 -12  -5 7583.30 552.407   5
  -3 -12  -6 3111.86 354.218   5
  -3 -12  -6 3390.77 785.843   4
  -3 -12  -7 2924.13 332.948   5
  -3 -12  -7 2667.04 640.277   4
  -3 -12  -8 9243.68 618.966   5
  -3 -12  -8 6827.82 1010.88   4
  -3 -12  -9 3645.16 374.181   5
  -3 -12  -9 3662.04 705.145   4
  -3 -12 -10-60.2344 135.193   5
  -3 -12 -10-48.8379 132.121   6
  -3 -12 -11 1499.83 424.602   6
  -3 -12 -11 2843.07 325.781   5
  -3 -12 -11 2799.43 577.926   4
  -3 -12 -12 3161.43 357.084   5
  -3 -12 -12 2053.02 464.474   6
  -3 -12 -12 2188.93 469.884   4
  -3 -12 -13 525.169 158.669   5
  -3 -12 -13 206.742 252.417   6
  -3 -12 -13 482.658 265.664   4
  -3 -12 -14 5802.58 492.574   5
  -3 -12 -14 4526.63 649.232   4
  -3 -12 -14 3196.39 602.143   6
  -3 -12 -15 1276.57 447.060   6
  -3 -12 -16 202.573 247.359   6
  -3 -12 -17 2164.43 590.946   6
   3  13  -8 1331.43 371.962   2
   3  13  -7-10.6727 127.603   2
   3  13  -6 3537.78 531.216   2
  -3 -13   5 4556.70 471.376   5
   3  13  -5 4753.61 622.554   2
   3  13  -4 75.7072 117.003   2
  -3 -13   4 91.0406 136.199   5
  -3 -13   3 1383.12 259.229   5
   3  13  -3 1536.97 355.128   2
  -3 -13   2 514.328 129.942   5
   3  13  -2 515.652 146.321   2
  -3 -13   1-269.300 165.478   5
  -3 -13   0 3190.29 372.929   5
  -3 -13   0 1809.43 760.886   4
  -3 -13  -1 12075.2 756.367   5
  -3 -13  -1 10014.0 1764.91   4
  -3 -13  -2 322.772 128.711   5
  -3 -13  -2-16.1166 301.979   4
  -3 -13  -3 2421.76 325.251   5
  -3 -13  -3 977.966 607.700   4
  -3 -13  -4 5017.96 463.326   5
  -3 -13  -4 2322.30 826.344   4
  -3 -13  -5 328.640 118.098   5
  -3 -13  -5 492.060 495.839   4
  -3 -13  -6 95.7668 75.8286   5
  -3 -13  -6 219.349 327.849   4
  -3 -13  -7 4357.70 440.724   5
  -3 -13  -7 2838.78 789.446   4
  -3 -13  -8-85.7669 122.500   5
  -3 -13  -8 156.332 131.494   4
  -3 -13  -9 886.459 175.251   5
  -3 -13  -9 883.052 406.289   4
  -3 -13 -10 1492.96 473.539   4
  -3 -13 -10 1281.07 225.750   5
  -3 -13 -11 838.977 171.983   5
  -3 -13 -11 1033.71 370.199   4
  -3 -13 -12 19.1412 138.102   4
  -3 -13 -12-92.9913 119.594   5
  -3 -13 -12-4.11239 111.889   6
  -3 -13 -13 4597.13 455.702   5
  -3 -13 -13 2935.93 595.251   4
  -3 -13 -13 2406.71 546.648   6
  -3 -13 -14 3097.99 388.471   5
  -3 -13 -14 1310.74 432.786   6
  -3 -13 -15 372.740 399.001   6
  -3 -13 -16 847.255 360.401   6
  -3 -13 -17 730.090 344.300   6
   3  14  -7 2119.59 434.742   2
   3  14  -6 2335.44 500.473   2
   3  14  -5 423.365 247.466   2
  -3 -14   4 4028.15 466.535   5
   3  14  -4 4014.35 583.202   2
  -3 -14   3 1660.78 293.970   5
   3  14  -3 1833.18 416.424   2
  -3 -14   2-242.974 179.564   5
   3  14  -2-96.4552 141.557   2
  -3 -14   1 2209.92 309.854   5
  -3 -14   0 2557.83 341.408   5
  -3 -14   0 2336.14 1056.95   4
  -3 -14  -1 583.209 163.024   5
  -3 -14  -1 456.850 582.634   4
  -3 -14  -2 2213.76 329.124   5
  -3 -14  -2 1003.28 734.626   4
  -3 -14  -3 5272.03 512.365   5
  -3 -14  -3 2962.54 1005.24   4
  -3 -14  -4 72.7312 78.5657   5
  -3 -14  -4 128.956 523.139   4
  -3 -14  -5 2529.81 352.358   5
  -3 -14  -5 1566.25 698.180   4
  -3 -14  -6 4889.53 492.478   5
  -3 -14  -6 3336.62 937.218   4
  -3 -14  -7 1488.79 254.953   5
  -3 -14  -7 1385.07 537.797   4
  -3 -14  -8 711.006 168.791   5
  -3 -14  -8 678.092 406.701   4
  -3 -14  -9 1329.39 233.985   5
  -3 -14  -9 1384.17 519.865   4
  -3 -14 -10-107.700 140.004   5
  -3 -14 -10 385.046 310.872   4
  -3 -14 -11 474.256 359.781   4
  -3 -14 -11 366.343 125.894   5
  -3 -14 -12 2491.42 349.266   5
  -3 -14 -12 2019.48 567.305   4
  -3 -14 -13 1519.02 477.353   4
  -3 -14 -13 1830.15 316.533   5
  -3 -14 -14 1258.30 267.053   5
  -3 -14 -14 528.924 290.466   6
  -3 -14 -15 4254.56 468.528   5
  -3 -14 -15 2442.27 622.635   6
  -3 -14 -16 317.345 240.801   6
  -3 -14 -17 639.650 448.878   6
   3  15  -5 2573.81 496.599   2
  -3 -15   4 274.819 180.852   5
   3  15  -4 143.367 109.151   2
  -3 -15   3 971.162 229.300   5
   3  15  -3 921.883 352.942   2
  -3 -15   2 1931.11 321.365   5
   3  15  -2 1933.26 455.104   2
  -3 -15   1 1060.45 234.472   5
  -3 -15   0-75.1443 136.095   5
  -3 -15   0 406.265 463.196   4
  -3 -15  -1 3341.74 417.330   5
  -3 -15  -1 2880.11 1092.53   4
  -3 -15  -2 3591.61 431.039   5
  -3 -15  -2 1918.87 919.086   4
  -3 -15  -3 1234.02 800.909   4
  -3 -15  -3 904.089 216.477   5
  -3 -15  -4 105.791 96.6881   5
  -3 -15  -4 372.475 422.680   4
  -3 -15  -5 869.023 194.651   5
  -3 -15  -5 666.950 536.423   4
  -3 -15  -6-41.0850 152.161   5
  -3 -15  -6 130.893 416.715   4
  -3 -15  -7 3010.80 392.788   5
  -3 -15  -7 2159.24 780.513   4
  -3 -15  -8 4967.66 514.741   5
  -3 -15  -8 3562.05 958.186   4
  -3 -15  -9-164.707 162.115   5
  -3 -15  -9 208.397 247.307   4
  -3 -15 -10 1401.32 272.012   5
  -3 -15 -10 1187.18 560.798   4
  -3 -15 -11 1782.66 305.139   5
  -3 -15 -11 1479.09 529.002   4
  -3 -15 -12-87.3543 181.684   5
  -3 -15 -12 142.410 231.137   4
  -3 -15 -13-29.8386 141.866   5
  -3 -15 -14 2861.39 394.614   5
  -3 -15 -15 419.261 176.992   5
  -3 -15 -16 743.341 309.419   6
   3  16  -3 2970.07 556.420   2
  -3 -16   3 3291.17 452.465   5
  -3 -16   2 1644.50 299.748   5
   3  16  -2 1879.83 440.166   2
  -3 -16   1-529.010 232.600   5
  -3 -16   0 2975.91 402.368   5
  -3 -16   0 1720.03 980.677   4
  -3 -16  -1 433.968 151.340   5
  -3 -16  -1 805.927 758.168   4
  -3 -16  -2-8.77961 155.908   5
  -3 -16  -2 902.441 812.359   4
  -3 -16  -3 4579.75 508.426   5
  -3 -16  -4 4777.31 533.532   5
  -3 -16  -4 2897.87 1068.79   4
  -3 -16  -5 887.700 225.189   5
  -3 -16  -5 555.628 383.555   4
  -3 -16  -6 1341.63 268.887   5
  -3 -16  -6 1462.45 693.297   4
  -3 -16  -7 1376.17 267.413   5
  -3 -16  -7 1763.64 798.147   4
  -3 -16  -8 48.6793 80.9716   5
  -3 -16  -8 413.469 551.430   4
  -3 -16  -9 6992.32 1350.15   4
  -3 -16  -9 4597.69 513.847   5
  -3 -16 -10 3939.49 468.213   5
  -3 -16 -10 3306.74 879.761   4
  -3 -16 -11-18.0077 124.007   5
  -3 -16 -11 290.952 296.837   4
  -3 -16 -12 1719.07 290.847   5
  -3 -16 -12 2675.92 780.036   4
  -3 -16 -13 2799.35 409.599   5
  -3 -16 -14 829.594 226.242   5
  -3 -16 -15 557.284 190.365   5
  -3 -17   3 390.660 191.700   5
  -3 -17   2 465.478 169.810   5
  -3 -17   1 1428.07 293.093   5
   3  17  -1 1954.38 494.523   2
  -3 -17   0 605.367 130.976   5
  -3 -17  -1-48.2906 163.832   5
  -3 -17  -1 1115.19 822.632   4
  -3 -17  -2 2607.35 390.212   5
  -3 -17  -2 2380.05 1081.34   4
  -3 -17  -3-68.1906 149.492   5
  -3 -17  -3 267.783 627.716   4
  -3 -17  -4-8.20864 158.581   5
  -3 -17  -4 336.652 742.841   4
  -3 -17  -5 2673.13 407.592   5
  -3 -17  -5 1779.76 955.419   4
  -3 -17  -6 485.445 144.266   5
  -3 -17  -6 1029.19 648.230   4
  -3 -17  -7-248.282 197.329   5
  -3 -17  -7 91.4956 401.423   4
  -3 -17  -8 2774.51 397.293   5
  -3 -17  -8 2281.46 894.615   4
  -3 -17  -9 2983.54 425.248   5
  -3 -17  -9 2421.45 840.234   4
  -3 -17 -10 144.724 114.580   5
  -3 -17 -10 841.140 519.054   4
  -3 -17 -11 866.450 192.221   5
  -3 -17 -11 1430.98 638.266   4
  -3 -17 -12 1194.31 232.242   5
  -3 -17 -13-94.1365 180.241   5
  -3 -17 -14 1637.80 321.450   5
  -3 -17 -15 2332.69 384.734   5
  -3 -18   0 1072.12 251.243   5
  -3 -18  -1 2782.38 416.706   5
  -3 -18  -1 2054.16 1085.55   4
  -3 -18  -2 254.295 121.944   5
  -3 -18  -2 1163.62 862.049   4
  -3 -18  -3 303.142 101.282   5
  -3 -18  -3 948.973 753.362   4
  -3 -18  -4 4040.03 517.924   5
  -3 -18  -5 1968.08 373.051   5
  -3 -18  -5 1339.23 887.299   4
  -3 -18  -6-308.703 224.180   5
  -3 -18  -6 918.117 751.664   4
  -3 -18  -7 618.869 179.913   5
  -3 -18  -7 272.766 468.043   4
  -3 -18  -8 54.8228 158.317   5
  -3 -18  -8 2283.91 963.902   4
  -3 -18  -9-254.494 201.204   5
  -3 -18  -9 324.423 545.840   4
  -3 -18 -10 2993.98 456.346   5
  -3 -18 -10 2336.86 854.993   4
  -3 -18 -11 3034.51 453.144   5
  -3 -18 -12-367.013 233.212   5
  -3 -19  -3 1342.16 782.605   4
  -3 -19  -4 341.470 685.257   4
  -3 -19  -5 463.777 785.955   4
  -3 -19  -6 1366.41 886.907   4
  -3 -19  -7 909.929 694.321   4
  -3 -19  -8 852.703 740.148   4
  -3 -19  -9 2088.62 1026.65   4
  -3 -20  -7 799.138 826.231   4
  -3 -20  -8 1297.67 1023.99   4
   4 -16 -10 1649.21 623.544   4
   4 -16  -9 392.504 301.805   4
   4 -16  -8 1685.28 661.389   4
   4 -16  -7 2388.39 853.542   4
   4 -16  -6 644.163 439.781   4
   4 -16  -5 3488.32 1064.14   4
   4 -16  -4 3706.87 1128.96   4
   4 -16  -3 226.725 348.554   4
   4 -16  -2 293.891 456.306   4
   4 -16  -1 905.618 721.427   4
   4 -15 -12 993.639 450.962   4
   4 -15 -11 222.213 297.919   4
   4 -15 -10 308.807 269.923   4
   4 -15  -9 2436.08 742.156   4
   4 -15  -8 629.523 376.610   4
   4 -15  -7 423.433 399.037   4
   4 -15  -6 2816.74 869.456   4
   4 -15  -5 1490.53 639.507   4
   4 -15  -4-98.1198 359.253   4
   4 -15  -3 1275.28 693.873   4
   4 -15  -2 1031.05 747.545   4
   4 -15  -1 590.060 668.679   4
   4 -15   0 3425.82 1368.64   4
   4 -15   1 1808.99 1011.31   4
   4 -15   2-99.7517 397.981   4
   4 -14 -14 993.706 390.772   4
   4 -14 -13 2022.80 549.005   4
   4 -14 -12 172.726 195.249   4
   4 -14 -11 129.390 202.673   4
   4 -14 -10 1135.26 586.347   4
   4 -14  -9 87.3818 161.688   4
   4 -14  -8 702.616 401.047   4
   4 -14  -7 1372.05 578.551   4
   4 -14  -6 497.248 397.976   4
   4 -14  -5 586.693 400.816   4
   4 -14  -4 2591.46 823.323   4
   4 -14  -3 578.543 533.013   4
   4 -14  -2 157.471 251.951   4
   4 -14  -1 1258.81 784.824   4
   4 -14   0 760.494 617.743   4
   4 -14   1 315.418 668.734   4
   4 -14   2 1399.88 1057.95   4
   4 -14   3 651.750 930.382   4
   4 -14   4 1104.63 1074.72   4
   4 -13 -15 405.688 280.634   4
   4 -13 -14 529.827 283.864   4
   4 -13 -13 327.072 249.119   4
   4 -13 -12 2624.95 570.201   4
   4 -13 -11 2614.67 589.009   4
   4 -13 -10 219.319 246.240   4
   4 -13  -9 957.337 414.785   4
   4 -13  -8 2377.71 637.591   4
   4 -13  -7 743.622 378.089   4
   4 -13  -6 283.300 396.162   4
   4 -13  -5 3249.43 850.172   4
   4 -13  -4 755.264 374.441   4
   4 -13  -3 1692.06 720.866   4
   4 -13  -2 2153.36 859.853   4
   4 -13  -1 1038.88 746.273   4
   4 -13   0 793.758 678.654   4
   4 -13   1 348.199 606.818   4
   4 -13   2 2012.58 1064.46   4
   4 -13   3 109.697 400.908   4
   4 -13   4 2860.93 1217.16   4
   4 -13   5 883.242 898.626   4
  -4  13  -7 2145.13 775.323   6
   4 -12 -15 401.729 265.426   4
   4 -12 -14 166.514 194.534   4
   4 -12 -13 1107.93 343.782   4
   4 -12 -12 2216.15 501.418   4
   4 -12 -11 198.801 201.153   4
   4 -12 -10 2568.28 555.849   4
   4 -12  -9 3294.59 665.813   4
   4 -12  -8 198.995 103.172   4
   4 -12  -7 142.168 207.376   4
   4 -12  -6 1576.54 507.203   4
   4 -12  -5 733.040 427.685   4
   4 -12  -4 2306.43 693.068   4
   4 -12  -3 5196.83 1107.89   4
   4 -12  -2 562.626 388.907   4
   4 -12  -1 2434.00 871.507   4
   4 -12   0 3090.35 1059.17   4
   4 -12   1 1546.95 782.768   4
   4 -12   2 383.313 589.624   4
   4 -12   3 2233.54 1162.80   4
   4 -12   4 975.333 807.882   4
   4 -12   5 245.799 734.267   4
   4 -12   6 110.768 403.299   4
  -4  12  -7 2663.56 861.837   6
  -4  12  -8 770.888 494.503   6
   4 -11 -16 901.609 326.493   4
   4 -11 -15 201.096 131.960   4
   4 -11 -14 1205.38 380.816   4
   4 -11 -13 862.915 303.582   4
   4 -11 -12 40.9525 104.222   4
   4 -11 -11 1769.62 425.223   4
   4 -11 -10 2367.20 507.566   4
   4 -11  -9 125.663 191.738   4
   4 -11  -8 3385.69 637.664   4
   4 -11  -7 4806.80 796.090   4
   4 -11  -6 1393.84 454.037   4
   4 -11  -5 925.126 394.526   4
   4 -11  -4 5065.94 979.429   4
   4 -11  -3 41.7470 172.942   4
   4 -11  -2 2418.94 771.843   4
   4 -11  -1 4669.10 1185.80   4
   4 -11   0-41.9523 237.768   4
   4 -11   1 2681.82 999.822   4
   4 -11   2 1965.39 926.379   4
   4 -11   3 2447.07 1050.14   4
   4 -11   4-73.7025 337.663   4
   4 -11   5 1619.78 904.784   4
   4 -11   6 810.555 758.160   4
  -4  11  -7-247.296 256.909   6
  -4  11  -8 1995.03 763.311   6
  -4  11  -9 1497.94 654.242   6
   4 -10 -16 424.040 237.926   4
   4 -10 -15 3546.63 601.192   4
   4 -10 -14 761.522 266.526   4
   4 -10 -13-104.421 114.647   4
   4 -10 -12 1834.14 417.353   4
   4 -10 -11 1117.60 325.886   4
   4 -10 -10 106.953 138.960   4
   4 -10  -9 3072.19 522.442   4
   4 -10  -8 3086.39 540.653   4
   4 -10  -7 104.907 137.638   4
   4 -10  -7 154.487 73.0168   1
   4 -10  -6 918.856 344.019   4
   4 -10  -6 1106.45 172.485   1
   4 -10  -5 2940.03 644.351   4
   4 -10  -5 2524.66 274.075   1
   4 -10  -4 707.553 345.659   4
   4 -10  -4 384.413 143.237   1
   4 -10  -3 2834.34 712.159   4
   4 -10  -2 6543.31 1150.50   4
   4 -10  -1 3791.78 936.128   4
   4 -10   0 351.170 462.168   4
   4 -10   1 1904.60 785.168   4
   4 -10   2 864.874 666.827   4
   4 -10   3 595.459 613.183   4
   4 -10   4 6747.10 1682.01   4
   4 -10   5 841.529 760.375   4
   4 -10   6 470.458 628.136   4
  -4  10  -7 3099.45 827.017   6
  -4  10  -8 1089.07 450.899   6
  -4  10  -9 406.183 433.248   6
  -4  10 -10 2518.98 752.993   6
   4  -9 -17 94.2256 125.118   4
   4  -9 -17 291.386 374.006   6
   4  -9 -16 1613.93 406.486   4
   4  -9 -16 1164.69 445.985   6
   4  -9 -15 576.165 238.274   4
   4  -9 -15 372.113 287.061   6
   4  -9 -14 900.583 285.778   4
   4  -9 -13 1777.29 399.058   4
   4  -9 -12 632.937 228.728   4
   4  -9 -11-33.0698 110.436   4
   4  -9 -10 2667.08 457.019   4
   4  -9  -9 1639.20 360.910   4
   4  -9  -9 1365.13 186.172   1
   4  -9  -8 1321.93 182.774   1
   4  -9  -8 1430.19 353.973   4
   4  -9  -7 3009.55 507.992   4
   4  -9  -7 2812.40 268.807   1
   4  -9  -6 791.066 140.486   1
   4  -9  -6 1106.31 322.571   4
   4  -9  -5 498.053 142.189   1
   4  -9  -5 566.190 272.473   4
   4  -9  -4 3174.96 636.887   4
   4  -9  -4 3046.04 322.396   1
   4  -9  -3 5207.18 887.676   4
   4  -9  -3 4976.09 428.802   1
   4  -9  -2 206.142 284.235   4
   4  -9  -2 69.8530 105.821   1
   4  -9  -1 3676.88 871.856   4
   4  -9   0 7409.57 1341.72   4
   4  -9   1 7.15404 308.978   4
   4  -9   2 2743.34 924.768   4
   4  -9   3 3762.27 1163.19   4
   4  -9   4 775.814 579.089   4
   4  -9   5 3196.20 1119.72   4
  -4   9  -6 3202.40 414.091   2
   4  -9   6 2696.80 1021.25   4
  -4   9  -7 216.246 326.250   6
  -4   9  -8 1730.92 575.006   6
  -4   9  -9 5876.94 1092.25   6
  -4   9 -10 2278.45 751.127   6
  -4   9 -11 981.175 552.456   6
   4  -8 -17 784.566 399.136   6
   4  -8 -17 831.218 302.218   4
   4  -8 -16 173.279 178.062   6
   4  -8 -16 499.450 230.773   4
   4  -8 -15 254.189 154.321   4
   4  -8 -15 577.000 390.373   6
   4  -8 -14 861.997 274.129   4
   4  -8 -14 659.079 340.263   6
   4  -8 -13 965.721 279.948   4
   4  -8 -13 425.398 237.406   6
   4  -8 -12 150.004 140.144   4
   4  -8 -11 214.952 141.497   4
   4  -8 -10 161.136 128.236   4
   4  -8  -9 388.166 166.747   4
   4  -8  -8 6673.90 703.186   4
   4  -8  -8 5950.69 406.598   1
   4  -8  -7 1371.55 193.085   1
   4  -8  -7 1811.41 366.815   4
   4  -8  -6 338.066 166.451   4
   4  -8  -6 135.588 79.4635   1
   4  -8  -5 2488.88 475.490   4
   4  -8  -5 1774.75 225.722   1
   4  -8  -4 2941.88 541.082   4
   4  -8  -4 3084.48 304.802   1
   4  -8  -3-75.6574 103.471   4
   4  -8  -3-15.5411 41.6000   1
   4  -8  -2 3717.11 738.204   4
   4  -8  -2 3131.24 349.365   1
   4  -8  -1 1386.29 250.983   1
   4  -8  -1 1584.11 545.534   4
   4  -8   0 3.37989 169.934   4
   4  -8   1 743.531 405.573   4
   4  -8   2 1664.43 706.923   4
   4  -8   3 297.109 437.553   4
   4  -8   4 3422.89 1116.80   4
   4  -8   5 4149.04 1246.75   4
   4  -8   6 807.127 671.732   4
  -4   8  -6 276.820 106.823   2
  -4   8  -7 3306.81 833.190   6
  -4   8  -7 2295.60 310.477   2
  -4   8  -8 2167.80 624.244   6
  -4   8  -9 281.611 271.665   6
  -4   8 -10 2507.14 721.081   6
  -4   8 -11 2893.03 780.128   6
  -4   8 -12 217.777 410.588   6
   4  -7 -17 309.661 226.596   4
   4  -7 -17 409.042 320.762   6
   4  -7 -16 2106.31 439.713   4
   4  -7 -16 1152.79 464.980   6
   4  -7 -15 1856.33 408.929   4
   4  -7 -15 2157.56 592.867   6
   4  -7 -14 298.363 190.233   4
   4  -7 -14 577.889 347.656   6
   4  -7 -13 904.384 259.479   4
   4  -7 -13 776.103 377.996   6
   4  -7 -12 3608.63 512.549   4
   4  -7 -12 2789.68 588.328   6
   4  -7 -11 1348.54 304.216   4
   4  -7 -11 524.415 230.966   6
   4  -7 -10 1439.13 305.136   4
   4  -7  -9 7178.51 690.543   4
   4  -7  -8 3882.09 503.923   4
   4  -7  -7 843.278 147.395   1
   4  -7  -7 984.317 242.355   4
   4  -7  -6 5000.70 379.529   1
   4  -7  -6 5316.83 595.916   4
   4  -7  -5 2697.26 280.842   1
   4  -7  -5 3178.95 474.623   4
   4  -7  -4 287.665 101.193   1
   4  -7  -4 616.402 237.472   4
   4  -7  -3 6663.69 469.962   1
   4  -7  -3 6735.83 807.780   4
   4  -7  -2 2006.03 483.732   4
   4  -7  -2 1981.78 262.974   1
   4  -7  -1-86.5044 125.081   4
   4  -7  -1 107.329 87.2552   1
   4  -7   0 1869.41 290.804   1
   4  -7   0 2318.83 605.427   4
   4  -7   1 5375.96 1045.39   4
   4  -7   1 4876.73 490.277   1
   4  -7   2 476.591 367.163   4
   4  -7   3 1663.62 688.097   4
   4  -7   4 3066.95 1010.61   4
   4  -7   5 54.7978 353.919   4
   4  -7   6 2035.29 835.379   4
  -4   7  -6 2407.45 309.682   2
  -4   7  -7 6865.44 494.316   2
  -4   7  -7 7062.94 1052.65   6
  -4   7  -8 1353.22 499.428   6
  -4   7  -9 1810.09 600.275   6
  -4   7 -10 2799.63 747.341   6
  -4   7 -11 697.589 381.449   6
  -4   7 -12 858.388 453.939   6
  -4   7 -13 1465.39 582.477   6
   4  -6 -17 952.611 293.645   4
   4  -6 -17 660.308 402.591   6
   4  -6 -16 2562.72 472.989   4
   4  -6 -16 3238.17 703.769   6
   4  -6 -15 189.552 144.023   4
   4  -6 -15 444.870 309.085   6
   4  -6 -14 1487.71 340.482   4
   4  -6 -14 1359.52 427.707   6
   4  -6 -13 1462.76 324.159   4
   4  -6 -13 1672.26 487.580   6
   4  -6 -12 903.851 254.596   4
   4  -6 -12 1007.13 382.978   6
   4  -6 -11 2258.31 504.641   6
   4  -6 -11 2315.47 394.702   4
   4  -6 -10 1616.42 410.528   6
   4  -6 -10 1411.98 294.806   4
   4  -6  -9 371.021 152.993   4
   4  -6  -8 1862.22 326.254   4
   4  -6  -7 9121.68 731.784   4
   4  -6  -6 2642.70 391.784   4
   4  -6  -5 1081.57 253.681   4
   4  -6  -5 907.474 159.856   1
   4  -6  -4 7339.95 485.830   1
   4  -6  -4 8620.88 743.110   4
   4  -6  -3 6366.13 466.199   1
   4  -6  -3 8375.00 786.362   4
   4  -6  -2 105.726 77.1201   1
   4  -6  -2 2.56661 126.067   4
   4  -6  -1 1021.53 193.946   1
   4  -6  -1 1171.58 367.065   4
   4  -6   0 461.237 146.112   1
   4  -6   0 645.994 329.711   4
   4  -6   1 192.852 122.764   1
   4  -6   1 521.954 375.411   4
   4  -6   2 6505.95 1117.55   4
   4  -6   2 6508.73 585.960   1
   4  -6   3 7094.70 1296.08   4
   4  -6   4 415.770 392.285   4
   4  -6   5 1798.65 756.470   4
   4  -6   6 1678.94 694.439   4
  -4   6  -6 2767.35 296.639   2
  -4   6  -7 958.328 158.545   2
  -4   6  -7 1364.31 467.119   6
  -4   6  -8 766.264 372.323   6
  -4   6  -8 869.354 168.875   2
  -4   6  -9 5218.32 923.355   6
  -4   6 -10 593.033 347.884   6
  -4   6 -11 3902.69 823.385   6
  -4   6 -12 2941.36 781.479   6
  -4   6 -13 346.983 297.261   6
   4  -5 -18 617.504 403.877   6
   4  -5 -17 1127.38 490.450   6
   4  -5 -16 283.494 291.857   6
   4  -5 -15 2148.39 565.077   6
   4  -5 -14 1644.40 481.040   6
   4  -5 -13 291.881 169.543   6
   4  -5 -12 1691.39 439.725   6
   4  -5 -11 4608.91 704.958   6
   4  -5 -10 1588.16 304.414   4
   4  -5 -10 1071.33 307.325   6
   4  -5  -9 1019.62 316.833   6
   4  -5  -9 1201.87 259.209   4
   4  -5  -8 1580.39 362.955   6
   4  -5  -8 2338.96 350.838   4
   4  -5  -7 447.471 162.683   4
   4  -5  -6 6977.36 598.422   4
   4  -5  -5 11317.6 782.383   4
   4  -5  -4 5233.73 402.866   1
   4  -5  -4 5924.31 562.416   4
   4  -5  -3 215.747 116.146   4
   4  -5  -3 100.995 52.7286   1
   4  -5  -2 10257.9 606.967   1
   4  -5  -2 9580.41 832.102   4
   4  -5  -1 3286.39 546.393   4
   4  -5  -1 3374.88 347.587   1
   4  -5   0 1975.09 275.383   1
   4  -5   0 2128.04 510.498   4
   4  -5   1 4490.05 793.226   4
   4  -5   1 3593.66 390.470   1
   4  -5   2 2599.11 667.760   4
   4  -5   2 3351.40 403.340   1
   4  -5   3 2.16684 66.0114   1
   4  -5   3-198.433 339.665   4
   4  -5   4 3775.76 981.903   4
   4  -5   5 2976.21 865.233   4
   4  -5   6 818.609 453.435   4
  -4   5  -6 1800.81 207.024   2
  -4   5  -7 8490.11 1059.66   6
  -4   5  -7 8103.99 442.426   2
  -4   5  -8 4868.45 797.029   6
  -4   5  -8 4234.82 296.361   2
  -4   5  -9-39.7682 148.622   6
  -4   5 -10 709.617 368.940   6
  -4   5 -11 4903.12 895.396   6
  -4   5 -12 272.962 327.191   6
  -4   5 -13 3128.75 783.824   6
  -4   5 -14 2912.32 793.427   6
   4  -4 -18 1002.32 432.194   6
   4  -4 -17 411.171 350.877   6
   4  -4 -16 1075.33 429.985   6
   4  -4 -15 1285.14 486.431   6
   4  -4 -14 721.313 356.382   6
   4  -4 -13 2664.06 549.733   6
   4  -4 -12 1647.80 409.043   6
   4  -4 -11 363.332 204.304   6
   4  -4 -10 1915.23 413.743   6
   4  -4  -9 4723.23 635.307   6
   4  -4  -8 1760.21 396.906   6
   4  -4  -7 1572.15 359.190   6
   4  -4  -7 3860.88 420.242   4
   4  -4  -6 5499.23 502.083   4
   4  -4  -5 3251.70 378.037   4
   4  -4  -4 2161.87 319.742   4
   4  -4  -3 692.465 183.983   4
   4  -4  -3 562.404 131.485   1
   4  -4  -2 1158.54 200.442   1
   4  -4  -2 1379.44 268.288   4
   4  -4  -1 2236.79 273.673   1
   4  -4  -1 2414.04 401.499   4
   4  -4   0 15197.1 1177.73   4
   4  -4   0 11948.6 693.356   1
   4  -4   1 862.005 194.116   1
   4  -4   1 1111.96 365.732   4
   4  -4   2 1762.87 497.308   4
   4  -4   2 1737.90 272.936   1
   4  -4   3 2794.89 714.945   4
   4  -4   3 3482.04 411.863   1
   4  -4   4 780.441 396.676   4
   4  -4   4 1632.39 300.722   1
   4  -4   5 3790.99 864.084   4
  -4   4  -6 11468.8 1125.66   6
  -4   4  -6 10913.1 461.031   2
  -4   4  -7 1680.58 472.986   6
  -4   4  -7 1463.88 155.091   2
  -4   4  -8 160.675 57.1522   2
  -4   4  -8 304.757 193.327   6
  -4   4  -9 1071.10 127.724   2
  -4   4  -9 995.767 415.782   6
  -4   4 -10 2287.86 598.345   6
  -4   4 -11 601.544 406.882   6
  -4   4 -12 3135.33 739.100   6
  -4   4 -13 3562.08 817.669   6
  -4   4 -14 285.081 373.375   6
  -4   4 -15 2615.28 885.308   6
   4  -3 -18 297.637 327.130   6
   4  -3 -17 1342.97 704.523   6
   4  -3 -16 2641.64 650.365   6
   4  -3 -15 386.429 384.313   6
   4  -3 -14 3011.37 574.084   6
   4  -3 -13 537.862 167.675   2
   4  -3 -13 1050.65 325.248   6
   4  -3 -12 1228.53 349.798   6
   4  -3 -12 1060.03 216.270   2
   4  -3 -11 3351.86 546.746   6
   4  -3 -11 2826.18 340.335   2
   4  -3 -10 3566.36 364.099   2
   4  -3 -10 3956.93 564.713   6
   4  -3  -9 747.007 158.535   2
   4  -3  -9 526.253 217.975   6
   4  -3  -8 808.137 153.399   2
   4  -3  -8 1026.82 281.161   6
   4  -3  -7 5280.98 636.773   6
   4  -3  -7 6527.42 442.224   2
   4  -3  -6 120.699 63.5682   2
   4  -3  -6 4.40723 109.857   6
   4  -3  -5 2613.94 316.605   4
   4  -3  -4 3451.80 362.125   4
   4  -3  -3 408.215 122.883   4
   4  -3  -2 14657.7 707.198   1
   4  -3  -2 15775.5 831.955   4
   4  -3  -1 11557.8 664.704   1
  -4   3   1 15515.4 576.379   2
   4  -3  -1 14552.0 846.287   4
   4  -3   0 1447.30 232.265   1
   4  -3   0 1532.09 329.872   4
  -4   3   0 1847.47 187.464   2
   4  -3   1 2899.90 513.134   4
   4  -3   1 2182.07 287.589   1
   4  -3   2 16742.2 874.904   1
   4  -3   2 18335.7 1447.19   4
   4  -3   3 527.518 276.056   4
   4  -3   3 1215.71 244.175   1
   4  -3   4 1573.42 553.413   4
   4  -3   4 1509.43 280.138   1
   4  -3   5 8621.56 1209.52   4
   4  -3   5 9587.41 755.856   1
  -4   3  -5 11221.4 418.314   2
  -4   3  -6 1994.74 450.670   6
  -4   3  -6 1856.76 146.227   2
  -4   3  -7 367.409 269.722   6
  -4   3  -7 163.312 43.5398   2
  -4   3  -8 2235.75 154.417   2
  -4   3  -8 2937.64 592.654   6
  -4   3  -9 367.823 64.8537   2
  -4   3  -9 425.180 223.625   6
  -4   3 -10 1238.39 436.001   6
  -4   3 -11 8333.07 1077.52   6
  -4   3 -12 7115.26 1031.12   6
  -4   3 -13-42.3120 286.136   6
  -4   3 -14 1708.80 597.628   6
  -4   3 -15 1987.91 653.199   6
   4  -2 -18 2697.28 737.039   6
   4  -2 -17 513.783 285.374   6
   4  -2 -16 273.054 145.740   2
   4  -2 -16 694.107 299.931   6
   4  -2 -15 2458.53 386.609   2
   4  -2 -15 2484.49 559.292   6
   4  -2 -14 2574.39 535.239   6
   4  -2 -14 2339.62 360.623   2
   4  -2 -13 487.174 187.631   2
   4  -2 -13 1114.89 370.559   6
   4  -2 -12 3706.77 415.991   2
   4  -2 -12 4845.53 665.629   6
   4  -2 -11 1605.33 254.625   2
   4  -2 -11 1788.31 378.180   6
   4  -2 -10 1324.34 213.384   2
   4  -2 -10 1685.54 367.237   6
   4  -2  -9 2108.90 384.703   6
   4  -2  -9 1820.79 234.660   2
   4  -2  -8 1691.02 218.022   2
   4  -2  -8 1769.80 347.822   6
   4  -2  -7 65.3285 29.3853   2
   4  -2  -7 167.372 146.569   6
   4  -2  -6 14143.7 620.914   2
   4  -2  -6 12514.4 925.811   6
   4  -2  -5 5421.08 622.088   6
   4  -2  -5 11821.4 531.352   2
   4  -2  -4 343.770 86.8188   2
   4  -2  -3 5650.27 430.910   4
   4  -2  -3 6370.48 353.334   2
   4  -2  -2 4294.31 370.664   4
   4  -2  -2 4367.75 277.295   2
  -4   2   1 2320.46 261.764   4
   4  -2  -1 2037.21 266.196   4
   4  -2  -1 1843.29 236.785   1
  -4   2   1 2199.74 171.041   2
  -4   2   0 681.516 152.504   4
   4  -2   0 486.745 140.823   1
  -4   2   0 702.003 88.2212   2
   4  -2   0 880.569 211.084   4
  -4   2  -1 4200.82 213.578   2
   4  -2   1 4391.58 532.968   4
   4  -2   1 3819.62 381.491   1
  -4   2  -1 5013.89 431.409   4
   4  -2   2 11246.2 970.686   4
  -4   2  -2 9274.17 330.021   2
  -4   2  -2 9362.68 668.148   4
   4  -2   2 8944.37 606.113   1
   4  -2   3 68.4442 97.2754   1
  -4   2  -3-11.0727 94.3531   4
   4  -2   3 45.2110 119.968   4
   4  -2   4 9862.99 1139.33   4
   4  -2   4 14841.9 861.000   1
   4  -2   5 573.291 197.024   1
   4  -2   5 467.747 319.439   4
  -4   2  -5 920.857 302.067   6
  -4   2  -5 584.942 64.3005   2
  -4   2  -6 6539.35 758.022   6
  -4   2  -6 4975.15 179.249   2
  -4   2  -7 5944.62 740.724   6
  -4   2  -7 4522.66 185.087   2
  -4   2  -8 1796.75 442.460   6
  -4   2  -8 1466.91 110.926   2
  -4   2  -9 121.627 49.7687   2
  -4   2  -9 58.7678 156.708   6
  -4   2 -10 4311.45 256.704   2
  -4   2 -10 5920.93 828.816   6
  -4   2 -11 3114.89 646.175   6
  -4   2 -12 918.706 494.005   6
  -4   2 -13 2775.65 680.473   6
  -4   2 -14 1087.98 430.238   6
  -4   2 -15 136.038 298.363   6
  -4   2 -16 869.211 500.553   6
   4  -1 -18 305.063 318.773   6
   4  -1 -17 390.775 181.641   2
   4  -1 -17 466.620 326.174   6
   4  -1 -16 955.973 244.035   2
   4  -1 -16 994.730 393.222   6
   4  -1 -15 688.505 218.343   2
   4  -1 -15 859.168 336.595   6
   4  -1 -14 142.335 214.208   6
   4  -1 -14 47.3234 86.5720   2
   4  -1 -13 5501.31 520.605   2
   4  -1 -13 5828.02 750.740   6
   4  -1 -12 1597.31 271.555   2
   4  -1 -12 1686.92 393.717   6
   4  -1 -11 2043.36 277.121   2
   4  -1 -11 1900.94 388.872   6
   4  -1 -10 7662.05 519.036   2
   4  -1 -10 7576.22 752.276   6
  -4   1   9 4158.10 271.117   3
   4  -1  -9 3515.57 490.228   6
   4  -1  -9 3626.40 332.276   2
   4  -1  -8-15.4925 38.4613   2
   4  -1  -8 134.064 139.191   6
   4  -1  -7 2297.02 361.452   6
   4  -1  -7 2014.95 223.810   2
   4  -1  -6 5593.16 560.601   6
   4  -1  -6 6537.97 386.648   2
   4  -1  -5 156.380 56.6524   2
   4  -1  -5 105.781 72.2179   6
   4  -1  -4 6402.68 348.453   2
  -4   1   3 12714.0 780.276   6
   4  -1  -3 10979.6 450.943   2
   4  -1  -2 843.966 150.953   4
   4  -1  -2 951.175 119.187   2
   4  -1  -1 108.495 66.9495   4
  -4   1   1 135.201 39.0458   2
   4  -1  -1 118.862 51.0449   2
   4  -1   0 9880.70 590.479   1
  -4   1   0 11781.5 535.317   4
   4  -1   0 9112.08 360.230   2
  -4   1   0 11137.2 356.352   2
   4  -1   0 10680.2 580.293   4
   4  -1   1 2737.64 312.220   1
  -4   1  -1 3018.00 277.009   4
   4  -1   1 2803.59 353.916   4
  -4   1  -1 3088.00 153.983   2
  -4   1  -2 147.031 29.8060   2
  -4   1  -2 213.261 102.962   4
   4  -1   2 131.744 75.8182   1
   4  -1   2 356.480 167.484   4
   4  -1   3 6984.87 541.457   1
   4  -1   3 6172.68 724.322   4
  -4   1  -3 7169.03 581.301   4
  -4   1  -4 3101.37 431.638   4
   4  -1   4 1294.96 385.655   4
   4  -1   4 2989.92 362.098   1
  -4   1  -5 2163.72 391.215   6
  -4   1  -5 1923.65 375.173   4
   4  -1   5 2067.49 325.861   1
  -4   1  -6 10519.7 886.137   6
   4  -1   6 9524.87 742.371   1
  -4   1  -7 65.2532 21.3690   2
  -4   1  -7 180.664 109.737   6
  -4   1  -8 1391.37 366.391   6
  -4   1  -8 954.167 92.2936   2
  -4   1  -9 4597.14 681.178   6
  -4   1  -9 3354.32 201.270   2
  -4   1 -10 1525.81 397.642   6
  -4   1 -11-43.7492 166.703   6
  -4   1 -12 5677.40 866.320   6
  -4   1 -13 1842.55 513.141   6
  -4   1 -14 705.409 411.077   6
  -4   1 -15 1598.10 530.971   6
  -4   1 -16 37.5224 266.917   6
   4   0 -18 1178.59 469.234   6
   4   0 -17 1386.78 332.956   2
   4   0 -17 1379.69 436.615   6
   4   0 -16 170.851 117.117   2
   4   0 -16 18.1417 152.574   6
   4   0 -15 106.288 69.2465   2
   4   0 -15 1129.08 355.258   6
   4   0 -14 1679.91 297.316   2
   4   0 -14 1709.52 428.611   6
   4   0 -13 1084.31 232.692   2
   4   0 -13 1556.83 410.551   6
   4   0 -12 665.762 181.892   2
   4   0 -12 772.942 286.367   6
   4   0 -11 5284.21 454.533   2
   4   0 -11 5334.11 646.608   6
   4   0 -10 1594.19 345.773   6
   4   0 -10 1536.41 231.982   2
   4   0  -9 1498.42 209.775   2
   4   0  -9 1377.09 301.959   6
  -4   0   8 7512.84 321.821   3
   4   0  -8 7953.76 469.744   2
   4   0  -8 7785.64 677.353   6
   4   0  -7 8034.21 447.002   2
   4   0  -7 7798.86 640.028   6
   4   0  -6 587.625 109.807   2
   4   0  -6 671.604 192.349   6
   4   0  -5 13860.7 546.344   2
   4   0  -5 12776.6 778.587   6
   4   0  -4 12947.8 502.231   2
   4   0  -4 11283.5 741.355   6
  -4   0   4 14417.8 725.965   6
   4   0  -3 172.544 49.9038   2
  -4   0   3 191.935 107.688   6
   4   0  -2 6723.27 300.050   2
  -4   0   2 6842.14 515.128   6
   4   0  -1 10548.9 375.088   2
  -4   0   1 11752.5 394.245   2
   4   0   0 806.688 126.539   4
   4   0   0 743.129 76.8155   2
  -4   0   0 943.166 87.1141   2
  -4   0  -1 15088.1 532.771   4
   4   0   1 13179.9 708.630   1
   4   0   1 12316.6 387.478   2
   4   0   1 15230.2 649.329   4
  -4   0  -1 15511.8 407.660   2
   4   0   2 2769.55 321.995   1
  -4   0  -2 3169.34 249.596   4
   4   0   2 2485.35 122.619   2
   4   0   2 3179.89 366.566   4
  -4   0  -2 2794.50 134.359   2
   4   0   3 4600.15 427.979   1
   4   0   3 3277.97 433.268   4
  -4   0  -3 4387.57 357.322   4
  -4   0  -4 1823.26 347.397   6
   4   0   4 1450.14 283.107   1
   4   0   4 1430.23 350.165   4
  -4   0  -4 1414.14 278.942   4
  -4   0  -5 7435.22 680.615   4
   4   0   5 9057.60 658.358   1
  -4   0  -5 10054.1 773.762   6
  -4   0  -6-11.6354 89.9568   6
   4   0   6 36.5591 89.4694   1
  -4   0  -6 58.5510 99.6793   4
  -4   0  -7 14146.5 1029.95   6
   4   0   7 12421.3 871.712   1
  -4   0  -8 7585.20 782.912   6
  -4   0  -9 2625.18 505.233   6
  -4   0 -10-102.112 106.995   6
  -4   0 -11 4945.72 764.444   6
  -4   0 -12 1393.07 408.360   6
  -4   0 -13 1625.44 488.958   6
  -4   0 -14 4641.46 806.970   6
  -4   0 -15 1859.54 558.290   6
  -4   0 -16 464.410 338.582   6
  -4   0 -17 573.972 330.515   6
   4   1 -17 199.810 163.843   2
   4   1 -17 395.475 218.090   6
   4   1 -16 1163.36 279.913   2
   4   1 -16 1442.75 443.503   6
   4   1 -15 996.857 251.973   2
   4   1 -15 1250.77 396.357   6
   4   1 -14 4.43257 50.6242   2
   4   1 -14 386.762 199.464   6
   4   1 -13 236.502 97.9421   2
   4   1 -13 235.990 194.320   6
   4   1 -12 1155.69 223.154   2
   4   1 -12 1035.97 316.730   6
   4   1 -11 70.3107 61.4429   2
   4   1 -11-28.1310 88.0323   6
   4   1 -10 362.781 111.580   2
   4   1 -10 541.439 237.310   6
   4   1  -9 6432.41 441.001   2
   4   1  -9 6277.96 629.724   6
   4   1  -8 3444.85 301.538   2
   4   1  -8 3126.07 415.422   6
  -4  -1   7 2326.17 128.381   3
   4   1  -7 3902.35 298.037   2
   4   1  -7 3673.58 418.947   6
   4   1  -6 16032.7 628.843   2
   4   1  -6 15117.4 840.431   6
   4   1  -5 1698.60 173.019   2
   4   1  -5 1617.57 250.415   6
  -4  -1   4 741.893 150.893   6
   4   1  -4 585.177 93.7218   2
   4   1  -4 597.003 158.238   6
   4   1  -3 8039.32 565.982   6
   4   1  -3 10721.7 427.319   2
  -4  -1   3 11989.1 550.706   6
  -4  -1   2 7269.64 403.222   6
   4   1  -2 5768.90 278.996   2
  -4  -1   1 756.809 107.199   2
   4   1  -1 709.922 83.6538   2
   4   1   0 3476.62 174.900   2
  -4  -1   0 3450.30 213.987   2
   4   1   1 222.482 57.4743   4
   4   1   1 282.653 108.167   1
  -4  -1  -1 252.253 57.0294   2
   4   1   1 333.042 47.8830   2
   4   1   2 7471.33 530.149   1
   4   1   2 7523.52 424.988   4
   4   1   2 7015.95 218.045   2
   4   1   3 8065.13 561.400   1
  -4  -1  -3 8712.53 588.525   6
   4   1   3 4693.42 411.606   4
   4   1   3 5702.81 168.707   2
  -4  -1  -3 7957.63 328.744   4
  -4  -1  -4 6010.64 522.918   6
  -4  -1  -4 4526.44 369.040   4
   4   1   4 5927.40 497.022   1
  -4  -1  -5 4330.47 464.621   6
  -4  -1  -5 3323.11 389.674   4
   4   1   5 4479.63 442.404   1
  -4  -1  -6 7957.31 670.856   6
  -4  -1  -6 3758.58 506.102   4
   4   1   6 7168.61 590.427   1
  -4  -1  -7 2969.56 451.245   6
  -4  -1  -7 1355.03 369.950   4
   4   1   7 2674.70 380.481   1
   4   1   7 1637.46 87.4172   2
  -4  -1  -8 514.228 179.697   6
   4   1   8 392.839 50.3817   2
   4   1   9 1302.21 107.590   2
  -4  -1  -9 2408.26 436.234   6
  -4  -1 -10 5187.68 691.200   6
  -4  -1 -11 2823.23 550.468   6
  -4  -1 -12 1029.95 350.677   6
  -4  -1 -13 6017.47 866.451   6
  -4  -1 -14 827.112 356.875   6
  -4  -1 -15 633.271 359.128   6
  -4  -1 -16 1922.61 546.490   6
  -4  -1 -17 573.257 332.114   6
   4   2 -16 1395.33 337.245   2
   4   2 -16 2509.48 607.360   6
   4   2 -15 197.364 282.445   6
   4   2 -15 231.403 136.663   2
   4   2 -14 1575.05 422.938   6
   4   2 -14 1374.07 274.981   2
   4   2 -13 2808.01 367.581   2
   4   2 -13 3352.86 578.346   6
   4   2 -12 75.3412 146.794   6
   4   2 -12 96.0070 68.1782   2
   4   2 -11 2203.40 290.428   2
   4   2 -11 2224.65 433.251   6
   4   2 -10 2464.53 430.596   6
   4   2 -10 2508.59 289.401   2
   4   2  -9 480.485 119.049   2
   4   2  -9 419.012 174.191   6
   4   2  -8 1243.63 280.756   6
   4   2  -8 1151.13 170.994   2
   4   2  -7 9725.67 503.479   2
   4   2  -7 9394.70 677.649   6
   4   2  -6 4291.71 305.251   2
   4   2  -6 3988.99 403.067   6
  -4  -2   5 3604.48 356.971   6
   4   2  -5 3550.39 349.885   6
   4   2  -5 3759.91 272.703   2
  -4  -2   4 4789.28 363.595   6
   4   2  -4 5124.78 302.177   2
   4   2  -4 4819.72 375.516   6
  -4  -2   3 4300.17 291.970   6
   4   2  -3 4577.00 267.606   2
   4   2  -3 4165.52 332.630   6
  -4  -2   2 1262.59 140.327   6
   4   2  -2 1159.64 123.453   2
  -4  -2   1 16608.8 545.911   6
   4   2  -1 18140.4 568.749   2
   4   2   0 5200.26 263.901   2
  -4  -2   0 6123.13 324.365   2
   4   2   1 3043.05 186.380   2
  -4  -2  -2 13533.8 605.133   6
   4   2   2 15262.7 743.301   1
   4   2   2 12574.2 412.974   2
  -4  -2  -3 6065.13 442.473   6
   4   2   3 6018.83 479.217   1
   4   2   3 5719.30 233.260   2
   4   2   4 1995.08 278.741   1
  -4  -2  -4 2041.52 270.097   6
  -4  -2  -5 12596.3 762.836   6
  -4  -2  -5 8268.46 542.683   4
   4   2   5 12418.0 731.433   1
   4   2   6 7622.37 227.911   2
   4   2   6 10484.6 691.636   1
  -4  -2  -6 11825.9 783.327   6
   4   2   7 95.3496 21.8385   2
  -4  -2  -7 56.1011 84.3393   6
   4   2   7 59.6816 58.7894   1
  -4  -2  -7-0.56890 77.2399   4
  -4  -2  -8 6217.80 659.568   6
  -4  -2  -8 3225.53 541.839   4
   4   2   8 5290.21 545.239   1
   4   2   8 4492.14 172.271   2
   4   2   9 1350.88 97.0106   2
  -4  -2  -9 1391.77 328.981   6
  -4  -2 -10 2215.94 445.142   6
   4   2  10 1364.78 117.727   2
  -4  -2 -11 2912.58 532.957   6
  -4  -2 -12 8782.29 956.034   6
  -4  -2 -13 278.864 279.559   6
  -4  -2 -14 3880.68 687.695   6
  -4  -2 -15 4678.58 488.408   3
  -4  -2 -15 5635.27 870.015   6
  -4  -2 -16 3162.52 686.603   6
  -4  -2 -17 530.687 360.362   6
   4   3 -16 39.7886 66.1359   2
   4   3 -15 1102.18 269.406   2
   4   3 -15 911.817 360.094   6
   4   3 -14 1825.77 458.038   6
   4   3 -14 1938.48 322.858   2
   4   3 -13 140.072 98.9076   2
   4   3 -13 185.917 218.988   6
   4   3 -12 3092.02 535.726   6
   4   3 -12 2754.79 346.239   2
   4   3 -11 722.363 165.893   2
   4   3 -11 704.948 243.997   6
   4   3 -10 696.240 216.481   6
   4   3 -10 461.999 122.838   2
   4   3  -9 703.274 237.202   6
   4   3  -9 621.720 137.420   2
   4   3  -8 2244.32 249.745   2
   4   3  -8 2161.00 348.383   6
   4   3  -7 253.453 127.021   6
   4   3  -7 166.227 64.3703   2
   4   3  -6 3056.34 347.409   6
   4   3  -6 3194.76 271.666   2
  -4  -3   5 8656.26 542.843   6
   4   3  -5 9035.42 545.144   6
   4   3  -5 10172.3 459.608   2
  -4  -3   4 222.578 95.9840   6
   4   3  -4 243.638 65.9611   2
   4   3  -4 230.650 90.8475   6
  -4  -3   3 1204.18 149.913   6
   4   3  -3 1169.19 154.665   6
   4   3  -3 1250.62 156.134   2
  -4  -3   2 14953.5 471.789   6
   4   3  -2 14935.3 583.009   2
   4   3  -2 11478.6 493.242   6
   4   3  -1 12356.0 516.943   2
   4   3   0 690.633 101.736   2
  -4  -3  -1 4376.89 221.947   6
   4   3   1 4572.15 269.845   2
  -4  -3  -2 101.994 49.5604   6
   4   3   2 114.393 47.1556   2
   4   3   2 100.429 72.4449   4
   4   3   3 2960.03 328.626   1
  -4  -3  -3 3092.09 283.060   6
   4   3   4 18239.8 884.608   1
   4   3   4 15238.4 801.769   6
  -4  -3  -4 18107.4 819.232   6
  -4  -3  -5 804.833 215.957   6
   4   3   5 638.498 166.953   1
  -4  -3  -6 1270.99 252.968   6
   4   3   6 1468.76 253.366   1
  -4  -3  -7 11843.9 830.506   6
   4   3   7 10770.4 372.902   2
   4   3   7 11681.1 754.964   1
  -4  -3  -8 6574.39 639.625   6
   4   3   8 5804.56 244.494   2
   4   3   8 5975.21 561.236   1
   4   3   9 81.4290 30.4982   2
  -4  -3  -9 47.0493 115.999   6
   4   3  10 3039.96 176.441   2
  -4  -3 -10 3969.69 549.954   6
  -4  -3 -11 2162.64 421.192   6
  -4  -3 -12 663.958 264.769   6
  -4  -3 -13 2045.93 470.299   6
  -4  -3 -13 1753.14 273.275   3
  -4  -3 -14 896.046 327.237   6
  -4  -3 -14 601.286 159.456   3
  -4  -3 -15 212.290 207.362   6
  -4  -3 -15-202.715 131.757   3
  -4  -3 -16 1973.13 546.737   6
  -4  -3 -17 3479.08 745.948   6
   4   4 -16 802.681 249.186   2
   4   4 -15 387.794 184.890   2
   4   4 -14 161.818 113.697   2
   4   4 -14 136.521 217.002   6
   4   4 -13 2407.18 505.734   6
   4   4 -13 2264.16 335.595   2
   4   4 -12 3783.19 406.685   2
   4   4 -12 3702.23 591.818   6
   4   4 -11 161.839 81.6666   2
   4   4 -11 192.739 234.313   6
   4   4 -10 8855.44 582.289   2
   4   4 -10 8797.64 813.604   6
   4   4  -9 4754.90 401.206   2
   4   4  -9 5793.86 611.610   6
   4   4  -8 1361.03 287.711   6
   4   4  -8 1352.54 204.191   2
   4   4  -7 3835.09 325.825   2
   4   4  -7 3471.31 414.366   6
   4   4  -6 16398.8 865.645   6
   4   4  -6 17485.3 722.009   2
   4   4  -5 4293.16 324.779   2
   4   4  -5 3755.29 357.690   6
   4   4  -4 101.869 92.3544   6
   4   4  -4 39.5376 45.0881   2
   4   4  -3 825.532 127.068   6
  -4  -4   3 755.693 95.1500   3
   4   4  -3 1622.42 240.221   2
  -4  -4   2 4509.35 243.387   3
   4   4  -2 4530.15 334.219   2
   4   4  -2 3527.46 209.034   6
  -4  -4   1 292.597 74.6091   5
   4   4  -1 203.067 75.1450   2
  -4  -4   0 22233.2 682.835   5
   4   4   0 18270.4 697.629   2
  -4  -4  -1 21450.2 660.032   5
   4   4   1 16050.7 641.499   2
   4   4   2 2440.18 202.250   6
  -4  -4  -2 3278.33 235.949   5
   4   4   2 2043.94 281.714   4
  -4  -4  -2 2390.06 181.706   6
  -4  -4  -3 19866.5 649.089   5
  -4  -4  -3 15967.8 629.705   6
   4   4   3 17056.5 798.675   1
   4   4   3 13735.0 481.409   4
   4   4   3 15258.9 664.901   6
   4   4   4 15936.9 798.635   6
   4   4   4 19864.2 919.749   1
  -4  -4  -4 20631.1 674.031   5
  -4  -4  -4 17777.2 768.226   6
  -4  -4  -5 41.7501 78.5193   6
  -4  -4  -5 86.1833 56.6942   5
   4   4   5-7.87033 65.4064   1
  -4  -4  -6 4545.50 247.163   4
   4   4   6 5930.68 494.544   1
  -4  -4  -6 5664.09 483.810   6
   4   4   7 2996.12 369.991   1
  -4  -4  -7 3081.53 384.586   6
  -4  -4  -8 348.339 161.236   6
   4   4   8 318.120 128.310   1
  -4  -4  -9 3713.85 480.443   6
  -4  -4 -10 2826.00 434.968   6
  -4  -4 -11 73.3503 167.107   6
  -4  -4 -12 2844.23 342.237   3
  -4  -4 -12 2805.44 513.555   6
  -4  -4 -13 957.132 198.195   3
  -4  -4 -13 1670.48 407.346   6
  -4  -4 -14 192.499 215.212   6
  -4  -4 -14-58.4317 94.6542   3
  -4  -4 -15 415.665 251.743   6
  -4  -4 -15 629.660 205.435   3
  -4  -4 -16 1953.93 500.207   6
  -4  -4 -16 1969.34 345.334   3
  -4  -4 -17 1034.26 452.412   6
  -4  -4 -18 1226.22 462.352   6
   4   5 -15 414.579 177.214   2
   4   5 -14 3479.04 457.736   2
   4   5 -13 1793.70 303.934   2
   4   5 -12 43.6865 81.8549   2
   4   5 -12 254.198 191.746   6
   4   5 -11 1901.83 285.252   2
   4   5 -11 2329.00 463.136   6
   4   5 -10 4607.22 596.103   6
   4   5 -10 4207.91 405.019   2
   4   5  -9 86.6040 141.740   6
   4   5  -9-55.5310 59.5160   2
   4   5  -8 3581.37 341.705   2
   4   5  -8 3549.10 461.867   6
   4   5  -7 4343.90 468.069   6
   4   5  -7 4501.72 369.992   2
   4   5  -6 53.5987 108.213   6
   4   5  -6-8.26066 58.1843   2
   4   5  -5 7417.58 499.822   2
   4   5  -5 8673.52 570.573   6
  -4  -5   4 2811.89 225.381   5
   4   5  -4 2223.96 265.095   2
   4   5  -4 2447.14 275.277   6
   4   5  -3 124.844 71.8746   6
   4   5  -3 67.2744 80.0622   2
  -4  -5   3 49.8546 53.8551   5
   4   5  -2 232.265 63.6430   6
  -4  -5   2 287.444 78.1636   3
  -4  -5   2 227.796 70.4728   5
   4   5  -2 208.309 82.4735   2
  -4  -5   1 10367.9 457.586   5
  -4  -5   1 9067.18 426.114   3
   4   5  -1 9925.19 542.148   2
  -4  -5   0 1370.44 154.570   5
  -4  -5   0 1158.31 146.006   3
   4   5   0 470.705 249.250   4
   4   5   0 1249.76 181.398   2
  -4  -5  -1 7108.42 357.381   5
  -4  -5  -1 6087.66 353.793   3
   4   5   1 3751.60 539.503   4
   4   5   2 9663.66 403.880   6
  -4  -5  -2 9609.30 431.043   5
  -4  -5  -2 8665.52 448.615   3
   4   5   2 8180.21 669.566   4
  -4  -5  -2 8078.74 406.784   6
   4   5   3 1942.93 212.443   6
  -4  -5  -3 1993.85 189.079   5
   4   5   3 1903.89 238.895   4
  -4  -5  -3 1784.37 193.456   6
  -4  -5  -4 1849.74 178.344   5
   4   5   4 2351.55 289.601   1
  -4  -5  -4 828.479 182.678   4
  -4  -5  -4 1802.34 219.708   6
   4   5   4 1850.43 235.612   6
   4   5   4 1830.06 156.351   4
   4   5   5 4700.19 421.283   1
  -4  -5  -5 4371.39 284.243   5
  -4  -5  -5 4046.54 347.264   4
  -4  -5  -5 4196.32 373.700   6
  -4  -5  -6 882.532 196.846   6
  -4  -5  -6 845.331 137.013   4
  -4  -5  -6 1204.01 153.767   5
   4   5   6 1126.02 225.451   1
  -4  -5  -7 509.058 145.604   6
  -4  -5  -7 392.259 86.5127   4
   4   5   7 517.449 161.878   1
  -4  -5  -7 749.855 132.356   5
  -4  -5  -8 5648.28 323.766   5
  -4  -5  -8 5031.70 409.060   3
   4   5   8 5169.96 489.482   1
  -4  -5  -8 5351.01 541.409   6
  -4  -5  -8 4273.91 307.199   4
  -4  -5  -9 2164.22 270.349   3
  -4  -5  -9 2409.90 378.164   6
   4   5   9 2271.27 341.509   1
  -4  -5 -10-90.6511 122.826   3
  -4  -5 -10 61.8422 106.540   6
  -4  -5 -11 3497.00 376.860   3
  -4  -5 -11 4566.95 584.263   6
  -4  -5 -12 1876.75 277.469   3
  -4  -5 -12 2241.01 434.838   6
  -4  -5 -13 961.435 310.865   6
  -4  -5 -13 1191.68 242.195   3
  -4  -5 -14 2898.51 385.961   3
  -4  -5 -14 3209.26 580.109   6
  -4  -5 -15 413.127 226.340   6
  -4  -5 -15 332.964 146.448   3
  -4  -5 -16 193.612 153.235   3
  -4  -5 -16 231.670 212.584   6
  -4  -5 -17 1940.60 538.341   6
  -4  -5 -18 2614.42 628.263   6
   4   6 -14 344.606 165.032   2
   4   6 -13 756.504 200.875   2
   4   6 -12 1342.27 261.601   2
   4   6 -11 711.701 293.913   6
   4   6 -11 755.122 191.644   2
   4   6 -10 269.352 175.928   6
   4   6 -10 130.116 64.5871   2
   4   6  -9 2945.89 334.047   2
   4   6  -9 3206.12 481.364   6
   4   6  -8 6487.50 489.110   2
   4   6  -8 6410.43 643.432   6
   4   6  -7 436.886 179.567   6
   4   6  -7 566.370 155.758   2
   4   6  -6 4701.64 416.945   2
   4   6  -6 5484.26 515.987   6
  -4  -6   5 3938.70 295.333   5
   4   6  -5 3239.58 361.048   2
   4   6  -5 3108.79 356.748   6
  -4  -6   4 1548.31 187.126   5
   4   6  -4 1273.61 216.699   2
   4   6  -4 1265.40 212.693   6
   4   6  -3 11997.4 591.196   6
  -4  -6   3 12505.3 539.181   5
   4   6  -3 12084.4 676.478   2
   4   6  -2 4445.91 294.780   6
  -4  -6   2 4428.57 299.692   5
   4   6  -2 4674.84 397.954   2
  -4  -6   1 476.443 122.812   3
   4   6  -1 413.287 77.6268   6
  -4  -6   1 374.077 89.9937   5
   4   6  -1 392.132 119.594   2
  -4  -6   0 5804.92 362.327   3
  -4  -6   0 6234.74 355.012   5
   4   6   0 6025.93 456.996   2
   4   6   0 4132.77 219.630   6
   4   6   1 9449.60 934.407   4
   4   6   1 11033.6 432.683   6
  -4  -6  -1 12571.0 570.883   3
  -4  -6  -1 13348.7 541.820   5
   4   6   2 479.338 99.5981   6
  -4  -6  -2 392.338 111.728   3
   4   6   2 566.989 234.774   4
  -4  -6  -2 494.101 101.891   5
   4   6   3 489.849 121.763   6
  -4  -6  -3 433.683 123.611   6
  -4  -6  -3 290.865 70.0679   3
  -4  -6  -3 399.538 91.2822   5
  -4  -6  -3 389.806 183.240   4
   4   6   3 354.404 134.527   4
   4   6   4 10176.2 599.980   6
  -4  -6  -4 11206.3 496.113   5
   4   6   4 12615.6 682.120   1
  -4  -6  -4 10040.0 560.876   6
  -4  -6  -4 10345.5 559.635   3
  -4  -6  -4 6869.46 666.616   4
   4   6   4 13680.5 624.006   4
   4   6   5 6581.93 503.444   1
  -4  -6  -5 5717.99 344.467   5
  -4  -6  -5 5454.50 403.795   3
  -4  -6  -5 4469.18 467.164   4
   4   6   5 7786.91 371.979   4
  -4  -6  -5 4953.98 412.701   6
   4   6   6 4760.39 438.901   1
  -4  -6  -6 4527.70 370.232   3
  -4  -6  -6 4512.95 299.466   5
  -4  -6  -6 5099.09 446.019   4
  -4  -6  -6 3874.38 390.314   6
   4   6   7 4220.31 412.907   1
  -4  -6  -7 4261.53 370.534   3
  -4  -6  -7 4195.41 290.667   5
  -4  -6  -7 5562.83 406.106   4
  -4  -6  -7 3941.02 416.801   6
  -4  -6  -8 1610.74 177.285   5
  -4  -6  -8 1651.11 245.237   3
   4   6   8 1555.25 264.628   1
  -4  -6  -8 1398.92 194.321   4
  -4  -6  -8 1769.78 299.918   6
  -4  -6  -9 1582.04 209.676   4
  -4  -6  -9 2095.71 211.354   5
  -4  -6  -9 1472.01 233.483   3
   4   6   9 1800.23 288.952   1
  -4  -6  -9 1768.14 316.521   6
  -4  -6 -10 7780.56 508.521   4
  -4  -6 -10 9493.71 634.347   3
  -4  -6 -10 10659.0 487.156   5
  -4  -6 -10 9231.76 784.754   6
  -4  -6 -11 9523.66 652.859   3
  -4  -6 -11 9359.43 827.401   6
  -4  -6 -11 8631.00 557.292   4
  -4  -6 -12 748.964 169.304   4
  -4  -6 -12 762.770 171.808   3
  -4  -6 -12 823.483 269.864   6
  -4  -6 -13 10166.5 962.506   6
  -4  -6 -13 10023.0 725.027   3
  -4  -6 -14 3700.21 455.128   3
  -4  -6 -14 3485.80 593.717   6
  -4  -6 -15 156.166 192.898   6
  -4  -6 -15 194.726 160.797   3
  -4  -6 -16 367.802 254.571   6
  -4  -6 -16 598.787 218.999   3
  -4  -6 -17 1190.01 394.586   6
  -4  -6 -18 321.558 285.203   6
   4   7 -14 1080.03 270.920   2
   4   7 -13 2688.55 393.270   2
   4   7 -12 296.835 129.210   2
   4   7 -11-72.1098 95.3828   2
   4   7 -10 736.484 187.429   2
   4   7  -9 618.987 236.508   6
   4   7  -9 692.499 178.431   2
   4   7  -8 469.732 207.215   6
   4   7  -8 281.919 99.7194   2
   4   7  -7 7720.69 577.442   2
   4   7  -7 8238.58 726.630   6
   4   7  -6 3871.98 467.683   6
  -4  -7   6 4932.12 354.578   5
   4   7  -6 3358.08 393.195   2
   4   7  -5 464.177 172.657   6
  -4  -7   5 560.640 109.751   5
   4   7  -5 629.567 172.545   2
   4   7  -4 4592.35 425.588   6
  -4  -7   4 4506.34 319.773   5
   4   7  -4 4428.49 430.773   2
   4   7  -3 2726.23 293.710   6
  -4  -7   3 2491.32 239.211   5
   4   7  -3 3094.56 347.600   2
   4   7  -2 99.0374 64.8015   6
  -4  -7   2 103.907 53.4917   5
   4   7  -2-3.18612 54.9388   2
   4   7  -1 3856.18 397.822   2
   4   7  -1 3714.90 285.437   6
  -4  -7   1 3836.22 294.417   5
  -4  -7   0 6052.62 373.623   5
   4   7   0 4338.59 323.313   6
  -4  -7  -1 566.674 148.245   3
  -4  -7  -1 613.860 112.893   5
   4   7   1 480.961 101.002   6
  -4  -7  -2 5024.54 385.003   3
  -4  -7  -2 5946.70 375.451   5
  -4  -7  -2 3269.87 594.169   4
   4   7   2 5850.49 348.799   6
   4   7   3 2395.69 262.261   6
  -4  -7  -3 1948.73 242.417   3
   4   7   3 2554.71 406.997   4
  -4  -7  -3 814.002 307.080   4
  -4  -7  -3 2454.46 237.198   5
   4   7   4 114.488 97.6362   4
   4   7   4 78.0883 125.186   6
  -4  -7  -4 39.5931 50.6348   3
  -4  -7  -4 25.1892 32.7892   5
  -4  -7  -4 47.6231 126.483   4
  -4  -7  -4 56.9633 87.1330   6
   4   7   5 8671.02 569.569   1
  -4  -7  -5 7627.12 435.461   5
  -4  -7  -5 6142.90 652.462   4
  -4  -7  -5 6955.39 520.779   6
  -4  -7  -5 6858.10 482.749   3
   4   7   5 9480.43 535.687   4
   4   7   6 10685.8 646.620   1
  -4  -7  -6 9285.74 581.507   3
  -4  -7  -6 9903.66 500.955   5
  -4  -7  -6 9253.56 745.262   4
  -4  -7  -6 8608.84 609.412   6
   4   7   7 510.551 135.448   1
  -4  -7  -7 445.763 140.915   3
  -4  -7  -7 380.587 127.734   4
  -4  -7  -7 565.043 108.161   5
  -4  -7  -7 400.067 138.404   6
  -4  -7  -8 2022.01 273.493   3
  -4  -7  -8 2108.59 217.601   5
  -4  -7  -8 2541.23 309.936   4
   4   7   8 2360.89 300.547   1
  -4  -7  -8 1857.85 308.291   6
  -4  -7  -9 4976.11 446.060   3
  -4  -7  -9 5047.90 337.423   5
   4   7   9 4897.53 449.925   1
  -4  -7  -9 4690.06 414.879   4
  -4  -7  -9 4417.32 514.318   6
  -4  -7 -10 2878.80 249.091   5
  -4  -7 -10 2723.50 348.897   3
  -4  -7 -10 2095.78 276.091   4
  -4  -7 -10 2427.73 395.683   6
  -4  -7 -11 388.548 190.354   6
  -4  -7 -11 325.457 98.6544   4
  -4  -7 -11 503.756 145.759   3
  -4  -7 -11 685.245 132.399   5
  -4  -7 -12 6612.73 393.996   5
  -4  -7 -12 5779.31 539.855   3
  -4  -7 -12 4703.25 625.499   6
  -4  -7 -12 4092.87 415.354   4
  -4  -7 -13 1723.77 278.084   4
  -4  -7 -13 2373.79 459.659   6
  -4  -7 -13 2258.66 359.846   3
  -4  -7 -14 490.997 166.711   4
  -4  -7 -14 828.027 252.421   3
  -4  -7 -14 596.978 283.461   6
  -4  -7 -15 2113.34 499.986   6
  -4  -7 -15 2515.19 412.580   3
  -4  -7 -16 721.991 336.596   6
  -4  -7 -16 1125.31 288.489   3
  -4  -7 -17 616.653 333.705   6
  -4  -7 -17 944.840 307.392   3
  -4  -7 -18 1250.37 439.222   6
   4   8 -13 471.147 189.715   2
   4   8 -12 1162.26 253.728   2
   4   8 -11 2570.55 367.883   2
   4   8 -10 863.296 228.104   2
   4   8  -9 62.8627 90.9242   2
   4   8  -8 2899.76 366.616   2
   4   8  -7 3076.01 468.417   6
  -4  -8   7 4053.14 342.533   5
   4   8  -7 2945.38 380.843   2
   4   8  -6 66.0418 120.783   6
   4   8  -6 101.873 89.3141   2
  -4  -8   6 182.872 78.1198   5
   4   8  -5 2448.10 364.445   6
   4   8  -5 2789.54 363.194   2
  -4  -8   5 2533.83 251.126   5
   4   8  -4 2123.50 318.096   6
  -4  -8   4 2170.23 229.775   5
   4   8  -4 2467.07 329.679   2
   4   8  -3 1100.08 214.375   6
  -4  -8   3 1253.36 182.873   5
   4   8  -3 1125.52 228.140   2
   4   8  -2 10824.2 630.261   6
  -4  -8   2 11544.0 579.853   5
   4   8  -2 11577.4 752.800   2
   4   8  -1 16399.8 929.814   2
  -4  -8   1 18430.7 765.045   5
   4   8   0 822.204 182.984   6
  -4  -8   0 1577.38 205.503   5
  -4  -8  -1 4401.32 348.130   5
   4   8   1 4877.15 373.040   6
  -4  -8  -2 6084.57 412.526   5
  -4  -8  -2 4453.70 768.042   4
   4   8   2 6137.94 420.657   6
  -4  -8  -3 1156.15 213.760   3
  -4  -8  -3 1285.03 184.835   5
  -4  -8  -3 344.898 199.988   4
   4   8   3 1463.87 233.330   6
  -4  -8  -4 4138.40 670.499   4
  -4  -8  -4 6794.10 488.766   3
  -4  -8  -4 7530.86 456.689   5
  -4  -8  -5 5481.22 444.926   3
  -4  -8  -5 6292.17 410.054   5
   4   8   5 6572.07 489.152   1
  -4  -8  -5 4118.19 624.461   4
  -4  -8  -5 4481.57 477.041   6
   4   8   6 74.0677 77.6604   4
  -4  -8  -6 0.44860 55.4121   3
  -4  -8  -6 25.7462 49.1622   5
   4   8   6 71.8985 63.2806   1
  -4  -8  -6 144.443 128.318   6
  -4  -8  -6 33.8971 136.126   4
  -4  -8  -7 2256.97 300.824   3
  -4  -8  -7 2523.35 255.440   5
  -4  -8  -7 2358.02 389.088   4
  -4  -8  -7 2112.10 326.288   6
   4   8   7 2514.33 296.853   1
  -4  -8  -8 5730.69 391.841   5
  -4  -8  -8 5355.35 475.325   3
  -4  -8  -8 5171.38 549.383   4
   4   8   8 5719.08 447.280   1
  -4  -8  -8 5037.55 526.219   6
  -4  -8  -9 1297.42 179.772   5
  -4  -8  -9 1387.19 245.584   3
  -4  -8  -9 1368.58 260.864   4
   4   8   9 1190.66 215.708   1
  -4  -8  -9 1076.09 260.479   6
  -4  -8 -10 2303.80 331.430   3
  -4  -8 -10 2316.28 238.742   5
  -4  -8 -10 2385.62 330.413   4
  -4  -8 -10 1938.68 358.395   6
  -4  -8 -11 6193.28 397.442   5
  -4  -8 -11 5621.67 540.832   3
  -4  -8 -11 5248.58 495.915   4
  -4  -8 -11 5343.02 628.568   6
  -4  -8 -12 2474.46 368.896   3
  -4  -8 -12 2641.88 261.219   5
  -4  -8 -12 1760.03 286.828   4
  -4  -8 -12 2078.47 412.488   6
  -4  -8 -13 54.9141 65.6704   4
  -4  -8 -13 420.682 191.872   3
  -4  -8 -13 450.070 121.301   5
  -4  -8 -13 211.731 145.431   6
  -4  -8 -14 854.633 209.485   4
  -4  -8 -14 1220.48 370.302   6
  -4  -8 -14 1544.77 309.481   3
  -4  -8 -15 634.073 303.520   6
  -4  -8 -15 1242.15 303.363   3
  -4  -8 -16 1051.98 481.510   6
  -4  -8 -17 3602.04 674.066   6
  -4  -8 -18 992.775 388.960   6
   4   9 -12 654.411 209.690   2
   4   9 -11 74.6592 128.881   2
   4   9 -10 1374.15 268.766   2
   4   9  -9 3451.98 420.372   2
   4   9  -8 1129.08 247.842   2
   4   9  -7 736.419 222.792   2
  -4  -9   7 806.210 155.888   5
   4   9  -6 8837.45 798.009   6
  -4  -9   6 8321.42 503.156   5
   4   9  -6 8519.14 703.641   2
   4   9  -5 3193.77 448.918   6
  -4  -9   5 2833.69 282.636   5
   4   9  -5 3225.14 421.082   2
   4   9  -4 106.638 96.2173   6
  -4  -9   4 85.7991 51.6808   5
   4   9  -4 201.128 121.454   2
   4   9  -3 1963.36 320.290   6
  -4  -9   3 1743.71 226.606   5
   4   9  -3 2042.71 322.949   2
   4   9  -2 612.798 166.864   6
  -4  -9   2 275.227 93.6966   5
   4   9  -2 375.645 144.404   2
  -4  -9   1 464.646 127.562   5
   4   9  -1 226.136 116.010   2
  -4  -9   0 8561.92 520.604   5
  -4  -9  -1 13447.4 666.126   5
   4   9   1 13754.8 764.724   6
  -4  -9  -2 328.313 124.768   5
  -4  -9  -2 384.182 283.445   4
   4   9   2 283.715 141.234   6
  -4  -9  -3 10993.9 585.198   5
  -4  -9  -3 2589.52 663.084   4
  -4  -9  -4 5025.08 385.891   5
  -4  -9  -4 2942.01 649.176   4
  -4  -9  -5 111.830 117.577   3
  -4  -9  -5 52.7004 97.7857   5
  -4  -9  -5 65.2494 210.155   4
   4   9   6 2651.63 312.388   1
  -4  -9  -6 2312.58 309.400   3
  -4  -9  -6 2460.24 268.698   5
  -4  -9  -6 2115.52 472.778   4
  -4  -9  -6 1424.94 303.402   6
   4   9   7 752.409 153.988   1
  -4  -9  -7 701.919 201.771   3
  -4  -9  -7 624.162 136.671   5
  -4  -9  -7 932.856 300.140   4
  -4  -9  -7 549.003 204.399   6
  -4  -9  -8 268.124 159.796   3
  -4  -9  -8-15.0188 49.6306   5
   4   9   8-9.32253 59.9393   1
  -4  -9  -8 75.7410 124.611   4
  -4  -9  -8 268.908 192.505   6
  -4  -9  -9 3768.73 424.428   3
  -4  -9  -9 4313.23 355.687   5
  -4  -9  -9 3110.84 455.175   4
   4   9   9 3623.76 347.865   1
  -4  -9  -9 3325.95 468.804   6
  -4  -9 -10 7158.02 598.440   3
  -4  -9 -10 8069.60 490.830   5
  -4  -9 -10 6641.64 639.136   4
  -4  -9 -10 6596.91 685.424   6
  -4  -9 -11 291.236 138.106   4
  -4  -9 -11 484.399 198.971   3
  -4  -9 -11 148.905 61.9398   5
  -4  -9 -11 89.4853 110.508   6
  -4  -9 -12 1888.21 323.659   3
  -4  -9 -12 1694.26 221.103   5
  -4  -9 -12 1437.34 285.971   4
  -4  -9 -12 1245.26 327.219   6
  -4  -9 -13 1392.75 366.392   6
  -4  -9 -13 2360.80 390.645   3
  -4  -9 -13 2164.58 239.652   5
  -4  -9 -13 1453.77 290.095   4
  -4  -9 -14 930.326 275.872   3
  -4  -9 -14 786.954 293.714   6
  -4  -9 -15 351.151 252.031   6
  -4  -9 -16 2140.12 502.609   6
  -4  -9 -17 1127.13 419.238   6
  -4  -9 -18 200.186 250.760   6
   4  10 -11 1344.31 278.178   2
   4  10 -10 2624.49 394.972   2
   4  10  -9 835.142 220.140   2
   4  10  -8 400.418 168.664   2
   4  10  -7 2843.66 433.365   2
  -4 -10   6-32.9692 70.9602   5
   4  10  -6 34.7751 140.893   2
  -4 -10   5 3454.21 332.438   5
   4  10  -5 4137.81 496.872   2
   4  10  -4 8832.37 722.727   2
   4  10  -4 7603.15 689.057   6
  -4 -10   4 7717.70 516.016   5
   4  10  -3 4654.95 520.229   6
  -4 -10   3 4344.93 383.319   5
   4  10  -3 4644.51 529.727   2
   4  10  -2 851.613 242.610   6
  -4 -10   2 972.871 184.114   5
   4  10  -2 995.826 231.314   2
  -4 -10   1 126.422 65.8408   5
   4  10  -1 39.1057 120.822   2
  -4 -10   0 1550.84 233.440   5
  -4 -10  -1 593.933 153.109   5
  -4 -10  -1 299.823 282.989   4
  -4 -10  -2 5995.23 450.367   5
  -4 -10  -2 4437.30 930.976   4
  -4 -10  -3 4216.23 376.334   5
  -4 -10  -3 1016.89 464.989   4
  -4 -10  -4 365.147 111.061   5
  -4 -10  -4 493.383 396.241   4
  -4 -10  -5 7827.89 513.610   5
  -4 -10  -5 4581.17 838.703   4
   4  10   6 5054.17 425.692   1
  -4 -10  -6 4877.67 409.340   5
  -4 -10  -6 4067.64 737.170   4
   4  10   7 347.151 111.536   1
  -4 -10  -7 384.859 140.524   5
  -4 -10  -7 215.459 177.852   4
  -4 -10  -7 296.746 168.022   6
  -4 -10  -8 489.694 211.974   6
  -4 -10  -8 725.286 153.394   5
   4  10   8 521.541 127.697   1
  -4 -10  -8 781.744 308.492   4
  -4 -10  -9 2057.08 263.983   5
  -4 -10  -9 1876.18 400.727   4
   4  10   9 1733.86 223.842   1
  -4 -10  -9 1650.89 339.483   6
  -4 -10 -10 112.032 78.2494   5
  -4 -10 -10 67.7109 73.2358   4
  -4 -10 -10 49.8242 128.430   6
  -4 -10 -11 2094.62 265.212   5
  -4 -10 -11 1725.24 372.753   6
  -4 -10 -11 1356.14 321.009   4
  -4 -10 -12 5583.68 424.370   5
  -4 -10 -12 4872.32 653.426   6
  -4 -10 -12 4912.73 564.197   4
  -4 -10 -13 149.277 135.851   4
  -4 -10 -13-10.5472 45.5171   5
  -4 -10 -13 160.054 155.525   6
  -4 -10 -14 2002.56 242.968   5
  -4 -10 -14 1280.76 377.708   6
  -4 -10 -15 1443.38 425.970   6
  -4 -10 -16 359.732 231.084   6
  -4 -10 -17 618.211 297.952   6
  -4 -10 -18 646.478 363.342   6
   4  11 -10 18.8918 86.2395   2
   4  11  -9 2002.03 361.630   2
   4  11  -8 2395.31 420.498   2
   4  11  -7 572.928 238.044   2
  -4 -11   6 1749.38 250.220   5
   4  11  -6 1823.61 367.454   2
   4  11  -5 4750.97 566.377   2
  -4 -11   5 4723.35 413.841   5
  -4 -11   4 952.375 193.213   5
   4  11  -4 863.303 243.718   2
   4  11  -3 994.412 236.211   2
  -4 -11   3 854.620 183.916   5
  -4 -11   2 4913.59 432.188   5
   4  11  -2 4948.09 555.388   6
   4  11  -2 5288.40 596.999   2
  -4 -11   1 119.146 98.5331   5
   4  11  -1-125.703 154.600   2
  -4 -11   0 257.638 105.272   5
  -4 -11  -1 5247.78 448.276   5
  -4 -11  -1 2415.67 773.381   4
  -4 -11  -2 4017.40 389.263   5
  -4 -11  -2 3251.77 874.098   4
  -4 -11  -3 291.689 100.088   5
  -4 -11  -3 17.0021 318.680   4
  -4 -11  -4 4250.90 393.920   5
  -4 -11  -4 2100.61 679.992   4
  -4 -11  -5 4133.81 393.041   5
  -4 -11  -5 2544.44 684.768   4
  -4 -11  -6 1474.31 235.835   5
   4  11   6 1431.21 218.654   1
  -4 -11  -6 941.079 395.403   4
   4  11   7 13687.6 684.715   1
  -4 -11  -7 14718.7 769.067   5
  -4 -11  -7 11143.6 1244.18   4
  -4 -11  -8 7453.01 528.277   5
  -4 -11  -8 6603.72 889.535   4
  -4 -11  -9 608.854 248.440   6
  -4 -11  -9 954.371 198.983   5
  -4 -11  -9 716.723 328.605   4
  -4 -11 -10 816.928 264.722   6
  -4 -11 -10 1010.98 195.643   5
  -4 -11 -10 1341.49 382.463   4
  -4 -11 -11 2450.91 303.053   5
  -4 -11 -11 1823.59 422.196   4
  -4 -11 -11 1500.80 370.643   6
  -4 -11 -12 41.7368 63.5176   5
  -4 -11 -12 62.2046 108.018   4
  -4 -11 -12 235.561 199.846   6
  -4 -11 -13 5346.11 713.145   6
  -4 -11 -13 6637.41 486.186   5
  -4 -11 -14 5727.94 447.350   5
  -4 -11 -14 4378.62 675.792   6
  -4 -11 -15 387.083 247.205   6
  -4 -11 -16 655.216 307.697   6
  -4 -11 -17 1762.52 495.025   6
  -4 -11 -18 724.722 389.694   6
   4  12  -9 1984.19 385.019   2
   4  12  -8-132.173 151.269   2
   4  12  -7 2183.85 426.682   2
   4  12  -6 2484.54 437.554   2
  -4 -12   5 130.235 100.813   5
   4  12  -5 130.053 152.965   2
  -4 -12   4 2227.66 299.880   5
   4  12  -4 2591.50 430.478   2
  -4 -12   3 4529.06 441.726   5
   4  12  -3 5325.79 624.820   2
  -4 -12   2 532.028 178.847   5
   4  12  -2 326.284 154.445   2
   4  12  -1 3528.87 511.001   2
  -4 -12   1 4057.28 416.427   5
  -4 -12   0 6006.81 497.161   5
  -4 -12  -1-17.2169 123.195   5
  -4 -12  -1 76.0618 314.696   4
  -4 -12  -2 854.588 181.415   5
  -4 -12  -2 678.621 498.626   4
  -4 -12  -3 6373.85 511.585   5
  -4 -12  -4 1919.42 266.287   5
  -4 -12  -4 1465.80 658.942   4
  -4 -12  -5 1329.09 223.673   5
  -4 -12  -5 595.504 393.644   4
  -4 -12  -6 10330.5 661.732   5
  -4 -12  -6 7488.30 1203.17   4
  -4 -12  -7 4626.64 438.102   5
  -4 -12  -7 3366.66 749.488   4
  -4 -12  -8 1526.43 244.271   5
  -4 -12  -8 1546.50 478.935   4
  -4 -12  -9 7218.10 551.939   5
  -4 -12  -9 5935.97 899.808   4
  -4 -12 -10 3681.20 396.603   5
  -4 -12 -10 3418.88 674.236   4
  -4 -12 -10 1663.60 411.482   6
  -4 -12 -11 37.9639 139.095   4
  -4 -12 -11 166.508 150.236   5
  -4 -12 -11-12.4615 148.806   6
  -4 -12 -12 2646.48 528.359   4
  -4 -12 -12 3571.64 381.846   5
  -4 -12 -12 2611.55 510.660   6
  -4 -12 -13 5150.57 461.905   5
  -4 -12 -13 3087.35 582.691   6
  -4 -12 -14 81.0652 61.1821   5
  -4 -12 -14 254.146 217.386   6
  -4 -12 -15 1425.02 440.457   6
  -4 -12 -16 1545.94 459.306   6
  -4 -12 -17 499.947 324.556   6
   4  13  -8 2189.97 440.420   2
   4  13  -7 3345.13 537.844   2
   4  13  -6 258.906 208.922   2
  -4 -13   5 1296.43 249.439   5
   4  13  -5 1279.44 325.466   2
  -4 -13   4 1877.44 291.452   5
   4  13  -4 1998.85 409.911   2
  -4 -13   3 321.024 137.705   5
   4  13  -3 350.340 191.014   2
  -4 -13   2 1564.06 269.868   5
   4  13  -2 1428.17 316.718   2
   4  13  -1 3766.65 557.276   2
  -4 -13   1 4545.69 470.923   5
  -4 -13   0 208.611 140.575   5
  -4 -13  -1 1859.66 892.684   4
  -4 -13  -1 2598.40 340.682   5
  -4 -13  -2 4410.29 439.619   5
  -4 -13  -2 3711.94 1050.62   4
  -4 -13  -3-177.344 159.182   5
  -4 -13  -3-6.97471 255.753   4
  -4 -13  -4 992.570 185.498   5
  -4 -13  -4 1068.19 589.531   4
  -4 -13  -5 4798.10 448.175   5
  -4 -13  -5 3546.77 947.619   4
  -4 -13  -6 1052.43 195.276   5
  -4 -13  -6 965.965 495.256   4
  -4 -13  -7-286.863 171.687   5
  -4 -13  -7 506.821 450.209   4
  -4 -13  -8 2206.05 318.341   5
  -4 -13  -8 2142.37 624.230   4
  -4 -13  -9 2128.84 305.039   5
  -4 -13  -9 1950.73 561.293   4
  -4 -13 -10 828.584 206.840   5
  -4 -13 -10 725.863 368.875   4
  -4 -13 -11 2124.13 320.153   5
  -4 -13 -11 2013.57 522.706   4
  -4 -13 -11 1160.94 358.914   6
  -4 -13 -12 414.055 202.532   6
  -4 -13 -12 317.469 120.315   5
  -4 -13 -13 359.158 151.645   5
  -4 -13 -13 325.884 261.669   6
  -4 -13 -14 4765.04 462.675   5
  -4 -13 -14 2815.01 588.225   6
  -4 -13 -15 1683.59 463.171   6
  -4 -13 -16 1.11093 185.002   6
  -4 -13 -17 1435.95 465.885   6
   4  14  -6 3211.82 547.232   2
   4  14  -5 2324.95 460.348   2
  -4 -14   4 1.69495 82.3241   5
   4  14  -4 170.890 176.078   2
  -4 -14   3 1144.48 235.324   5
   4  14  -3 1606.25 376.178   2
  -4 -14   2 2327.69 344.109   5
   4  14  -2 2052.88 428.885   2
   4  14  -1 1076.89 351.949   2
  -4 -14   1 440.364 160.899   5
  -4 -14   0 4332.12 472.202   5
  -4 -14  -1 6718.25 583.355   5
  -4 -14  -1 3444.09 1093.37   4
  -4 -14  -2-33.7887 102.371   5
  -4 -14  -2 146.599 461.854   4
  -4 -14  -3 448.642 118.969   5
  -4 -14  -3 1666.83 685.120   4
  -4 -14  -4 490.707 75.9090   5
  -4 -14  -4 200.867 247.484   4
  -4 -14  -5-133.872 159.293   5
  -4 -14  -5 378.107 456.688   4
  -4 -14  -6-3.76732 149.785   5
  -4 -14  -6 728.617 645.823   4
  -4 -14  -7 1428.15 229.893   5
  -4 -14  -7 1465.43 580.950   4
  -4 -14  -8-73.8540 138.463   5
  -4 -14  -8 371.678 298.391   4
  -4 -14  -9 994.953 218.652   5
  -4 -14  -9 1309.37 497.528   4
  -4 -14 -10 6506.14 579.184   5
  -4 -14 -10 5457.75 992.081   4
  -4 -14 -11 981.990 216.495   5
  -4 -14 -11 1182.10 476.340   4
  -4 -14 -12 258.498 156.531   5
  -4 -14 -13 1848.49 300.247   5
  -4 -14 -13 397.724 233.678   6
  -4 -14 -14 971.777 619.633   6
  -4 -14 -14 1722.78 301.818   5
  -4 -14 -15 545.942 160.237   5
  -4 -14 -15 137.969 176.333   6
  -4 -14 -16 2143.23 584.802   6
  -4 -14 -17 1468.44 548.670   6
   4  15  -5 20.3917 147.069   2
   4  15  -4 3874.05 602.033   2
  -4 -15   4 3791.98 466.357   5
  -4 -15   3 1736.72 325.979   5
   4  15  -3 1749.69 430.940   2
  -4 -15   2 479.453 188.291   5
   4  15  -2 274.956 193.119   2
  -4 -15   1 1789.40 315.829   5
   4  15  -1 1319.60 338.035   2
  -4 -15   0 2650.57 390.140   5
  -4 -15  -1 675.868 194.064   5
  -4 -15  -1 534.465 523.157   4
  -4 -15  -2 1108.93 656.344   4
  -4 -15  -2 2187.30 347.363   5
  -4 -15  -3 2481.22 360.634   5
  -4 -15  -3 2380.46 883.803   4
  -4 -15  -4-54.9266 145.139   5
  -4 -15  -5 2273.67 338.233   5
  -4 -15  -5 1909.30 846.270   4
  -4 -15  -6 3658.20 426.837   5
  -4 -15  -6 2437.71 940.995   4
  -4 -15  -7 34.5606 158.380   5
  -4 -15  -7 293.491 382.500   4
  -4 -15  -8 908.322 197.423   5
  -4 -15  -8 990.395 538.944   4
  -4 -15  -9 4305.56 481.531   5
  -4 -15  -9 3642.62 878.956   4
  -4 -15 -10 1663.16 293.435   5
  -4 -15 -10 1685.72 615.752   4
  -4 -15 -11 619.115 196.835   5
  -4 -15 -12 2488.42 381.760   5
  -4 -15 -13 1801.76 332.818   5
  -4 -15 -14-103.498 114.449   5
  -4 -15 -15 2493.90 362.748   5
  -4 -15 -15 723.197 373.595   6
  -4 -15 -16 1075.59 464.421   6
  -4 -16   3 258.019 148.560   5
   4  16  -3 126.284 143.751   2
   4  16  -2 1732.76 431.725   2
  -4 -16   2 1860.71 344.040   5
  -4 -16   1 2160.79 383.848   5
   4  16  -1 1651.38 417.524   2
  -4 -16   0 55.4477 128.381   5
  -4 -16  -1 4594.73 526.468   5
  -4 -16  -2 1050.32 259.329   5
  -4 -16  -2 927.623 667.374   4
  -4 -16  -3-297.256 191.905   5
  -4 -16  -3 437.977 609.442   4
  -4 -16  -4 1313.35 275.238   5
  -4 -16  -4 864.996 623.753   4
  -4 -16  -5 2905.42 393.530   5
  -4 -16  -5 1667.69 758.828   4
  -4 -16  -6-116.411 114.076   5
  -4 -16  -6 467.415 547.197   4
  -4 -16  -7 6009.06 590.142   5
  -4 -16  -7 3902.53 1309.66   4
  -4 -16  -8 2456.28 383.805   5
  -4 -16  -8 3047.17 942.734   4
  -4 -16  -9-235.987 181.889   5
  -4 -16  -9 556.584 677.677   4
  -4 -16 -10 2174.41 369.671   5
  -4 -16 -11 3836.24 481.429   5
  -4 -16 -12 268.898 153.895   5
  -4 -16 -13 996.049 271.417   5
  -4 -16 -14 2064.05 358.415   5
  -4 -16 -15 70.0585 98.9418   5
  -4 -17   3 2007.42 374.827   5
  -4 -17   2 1912.68 353.233   5
  -4 -17   1 339.046 163.628   5
  -4 -17   0 3516.71 477.039   5
  -4 -17  -1 1507.57 318.478   5
  -4 -17  -2-22.1660 96.4278   5
  -4 -17  -2 944.353 772.366   4
  -4 -17  -3 2411.67 387.098   5
  -4 -17  -3 2187.44 1050.85   4
  -4 -17  -4 1209.53 277.691   5
  -4 -17  -4 1390.82 825.305   4
  -4 -17  -5 230.430 99.1511   5
  -4 -17  -6 915.524 259.206   5
  -4 -17  -6 1107.23 738.709   4
  -4 -17  -7 1858.34 333.555   5
  -4 -17  -7 1166.73 722.802   4
  -4 -17  -8-2.78412 121.365   5
  -4 -17  -8 359.446 532.817   4
  -4 -17  -9 2928.20 435.504   5
  -4 -17  -9 1872.53 770.355   4
  -4 -17 -10 4096.12 511.475   5
  -4 -17 -11 971.103 270.220   5
  -4 -17 -12 1292.51 308.846   5
  -4 -17 -13 2180.27 381.154   5
  -4 -17 -14 167.051 144.347   5
  -4 -17 -15 198.452 163.382   5
  -4 -18  -1 619.987 247.968   5
  -4 -18  -2 2344.21 416.409   5
  -4 -18  -3 639.845 213.270   5
  -4 -18  -3 207.766 535.756   4
  -4 -18  -4 283.221 143.535   5
  -4 -18  -4 703.332 778.857   4
  -4 -18  -5 2057.65 356.474   5
  -4 -18  -5 989.043 869.829   4
  -4 -18  -6 2074.56 390.490   5
  -4 -18  -6 683.173 662.944   4
  -4 -18  -7-201.882 160.172   5
  -4 -18  -7 1669.69 1011.38   4
  -4 -18  -8 2556.26 407.961   5
  -4 -18  -8 1633.99 780.545   4
  -4 -18  -9 2914.30 457.694   5
  -4 -18 -10 477.799 197.775   5
  -4 -18 -11 2821.09 448.902   5
  -4 -19  -3 529.850 702.047   4
  -4 -19  -4 1300.26 860.713   4
  -4 -19  -5 1770.26 1442.19   4
  -4 -19  -7 526.734 594.507   4
  -4 -20  -5 1061.07 848.513   4
   5 -16  -7 871.967 587.134   4
   5 -16  -6 3304.71 1037.45   4
   5 -16  -5 100.989 297.621   4
   5 -16  -4 581.366 431.286   4
   5 -16  -3 859.469 821.716   4
   5 -15 -11 1188.07 529.899   4
   5 -15 -10 565.965 336.210   4
   5 -15  -9 274.880 263.253   4
   5 -15  -8 1076.28 530.511   4
   5 -15  -7 865.021 496.921   4
   5 -15  -6 611.938 562.414   4
   5 -15  -5 3552.70 1031.03   4
   5 -15  -4 1546.13 769.595   4
   5 -15  -3 295.319 490.235   4
   5 -15  -2 534.770 627.727   4
   5 -15  -1 1433.45 930.872   4
   5 -15   0 475.979 617.393   4
   5 -15   1 1190.13 1029.52   4
   5 -14 -12 872.407 423.280   4
   5 -14 -11 438.825 315.655   4
   5 -14 -10 190.382 235.549   4
   5 -14  -9 983.479 493.774   4
   5 -14  -8 235.374 334.630   4
   5 -14  -7 395.988 393.109   4
   5 -14  -6 1315.39 599.245   4
   5 -14  -5 1072.96 565.086   4
   5 -14  -4 473.470 416.621   4
   5 -14  -3 2686.85 964.825   4
   5 -14  -2 1309.21 629.942   4
   5 -14  -1 56.9005 280.836   4
   5 -14   0 611.349 442.940   4
   5 -14   1 570.598 652.928   4
   5 -14   2 106.349 459.215   4
   5 -14   4 2078.81 1125.28   4
   5 -13 -13 2205.37 548.174   4
   5 -13 -12 541.496 315.812   4
   5 -13 -11 893.181 384.426   4
   5 -13 -10 1441.79 480.372   4
   5 -13  -9 260.877 292.773   4
   5 -13  -8 398.899 271.091   4
   5 -13  -7 709.184 389.812   4
   5 -13  -6 727.380 422.499   4
   5 -13  -5 353.719 313.795   4
   5 -13  -4 1830.22 675.059   4
   5 -13  -3 1187.95 639.905   4
   5 -13  -2-127.876 321.093   4
   5 -13  -1 3554.21 1119.41   4
   5 -13   0 1151.38 724.594   4
   5 -13   1 37.8452 236.554   4
   5 -13   2 1656.39 987.888   4
   5 -13   3 2094.54 1115.91   4
   5 -13   4 592.062 722.426   4
   5 -13   5 3325.79 1584.35   4
   5 -13   6 1502.47 1044.10   4
   5 -12 -14 1064.08 358.512   4
   5 -12 -13 212.155 231.603   4
   5 -12 -12 1666.93 439.896   4
   5 -12 -11 3223.45 621.927   4
   5 -12 -10 1172.88 419.305   4
   5 -12  -9 1336.96 435.419   4
   5 -12  -8 2579.54 620.016   4
   5 -12  -7 731.950 365.373   4
   5 -12  -6 361.664 297.808   4
   5 -12  -5 2762.63 753.761   4
   5 -12  -4 1136.37 522.204   4
   5 -12  -3 813.410 503.954   4
   5 -12  -2 2425.38 846.151   4
   5 -12  -1 684.652 508.048   4
   5 -12   0 614.878 565.587   4
   5 -12   1 1234.68 756.474   4
   5 -12   2 1277.17 822.539   4
   5 -12   3 193.801 703.652   4
   5 -12   4 1861.28 1179.37   4
   5 -12   5 1268.61 951.720   4
   5 -12   6 152.010 595.908   4
  -5  12  -7 1608.21 681.692   6
   5 -11 -15 773.235 309.609   4
   5 -11 -14 12.4437 100.104   4
   5 -11 -13 1912.50 462.269   4
   5 -11 -12 2488.93 517.964   4
   5 -11 -11 454.834 249.952   4
   5 -11 -10 505.847 248.669   4
   5 -11  -9 5005.83 758.698   4
   5 -11  -8 285.167 220.262   4
   5 -11  -7 2199.07 556.491   4
   5 -11  -6 1850.69 539.870   4
   5 -11  -5-13.4112 137.481   4
   5 -11  -4 1525.03 551.141   4
   5 -11  -3 3299.71 856.296   4
   5 -11  -2 1558.39 707.507   4
   5 -11  -1 427.441 448.659   4
   5 -11   0 3716.29 1081.29   4
   5 -11   1 1041.41 677.007   4
   5 -11   2 262.986 508.531   4
   5 -11   3 1086.21 839.075   4
   5 -11   4 1288.99 780.317   4
   5 -11   5 513.335 508.555   4
   5 -11   6 1048.10 839.266   4
  -5  11  -7 1259.81 670.442   6
  -5  11  -8 119.544 534.969   6
   5 -10 -15 67.6893 134.199   4
   5 -10 -14 1513.18 405.973   4
   5 -10 -13 1319.65 369.903   4
   5 -10 -12-38.7518 66.3802   4
   5 -10 -11 802.620 274.468   4
   5 -10 -10 1647.48 419.676   4
   5 -10  -9 812.983 304.324   4
   5 -10  -8 2475.63 507.891   4
   5 -10  -7 3897.67 676.132   4
   5 -10  -6 105.211 109.450   1
   5 -10  -6-147.220 193.503   4
   5 -10  -5 1568.36 241.821   1
   5 -10  -5 1565.78 462.200   4
   5 -10  -4 1852.34 276.026   1
   5 -10  -4 2135.35 580.587   4
   5 -10  -3 509.960 153.591   1
   5 -10  -3 541.989 344.957   4
   5 -10  -2 1661.22 626.656   4
   5 -10  -1 5382.60 1127.01   4
   5 -10   0 2052.97 1008.90   4
   5 -10   1 1337.37 718.908   4
   5 -10   2 3945.62 1273.17   4
   5 -10   3 794.353 717.797   4
   5 -10   4 183.032 494.845   4
   5 -10   5 1282.84 823.167   4
   5 -10   6 1561.81 900.388   4
  -5  10  -7 529.928 345.217   6
  -5  10  -8 2715.69 783.460   6
  -5  10  -9 1932.21 730.206   6
   5  -9 -16-19.7065 135.619   4
   5  -9 -15 589.663 255.513   4
   5  -9 -14 179.280 102.809   4
   5  -9 -13 69.8995 77.6910   4
   5  -9 -12 1151.40 314.192   4
   5  -9 -11-14.6236 81.1102   4
   5  -9 -10 67.6288 96.9512   4
   5  -9  -9 1159.08 320.821   4
   5  -9  -8 1769.91 241.154   1
   5  -9  -8 1939.31 413.696   4
   5  -9  -7 0.91687 80.3391   4
   5  -9  -7 31.4457 48.8399   1
   5  -9  -6 3052.04 565.516   4
   5  -9  -6 2305.01 275.375   1
   5  -9  -5 1505.68 230.412   1
   5  -9  -5 956.224 314.109   4
   5  -9  -4 81.6704 102.845   1
   5  -9  -4 85.1476 150.743   4
   5  -9  -3 4454.80 824.669   4
   5  -9  -3 3383.81 384.992   1
   5  -9  -2 7010.36 1105.94   4
   5  -9  -2 5440.05 505.514   1
   5  -9  -1 582.779 187.530   1
   5  -9  -1 799.696 445.206   4
   5  -9   0 1529.87 630.387   4
   5  -9   1 663.577 473.267   4
   5  -9   2 68.7452 393.931   4
   5  -9   3 2119.24 914.915   4
   5  -9   4 3074.79 1116.12   4
   5  -9   5 247.473 420.583   4
   5  -9   6 1611.02 916.113   4
  -5   9  -7 4898.51 1021.47   6
  -5   9  -8 1452.66 585.799   6
  -5   9  -9-284.846 231.735   6
  -5   9 -10 2141.64 733.142   6
   5  -8 -17 164.319 297.800   6
   5  -8 -16 1384.51 384.554   4
   5  -8 -16 715.601 379.570   6
   5  -8 -15 400.751 211.534   4
   5  -8 -14 134.175 137.039   4
   5  -8 -13 1016.32 305.774   4
   5  -8 -12 1407.09 343.884   4
   5  -8 -11 115.487 82.1159   4
   5  -8 -10 1899.14 384.260   4
   5  -8  -9 2483.58 441.152   4
   5  -8  -8 7.30394 69.4498   4
   5  -8  -8 81.6480 75.3153   1
   5  -8  -7 3567.72 350.316   1
   5  -8  -7 3832.24 555.820   4
   5  -8  -6 3074.42 323.530   1
   5  -8  -6 4043.84 584.721   4
   5  -8  -5 595.176 143.422   1
   5  -8  -5 726.979 258.461   4
   5  -8  -4 394.542 139.648   1
   5  -8  -4 288.564 210.186   4
   5  -8  -3 2563.65 576.927   4
   5  -8  -3 2287.98 295.737   1
   5  -8  -2 130.391 151.151   4
   5  -8  -2 270.994 132.259   1
   5  -8  -1 6552.39 1078.22   4
   5  -8  -1 5516.93 524.633   1
   5  -8   0 6977.14 1184.93   4
   5  -8   0 5105.84 521.523   1
   5  -8   1 1057.42 242.707   1
   5  -8   1 600.912 395.627   4
   5  -8   2 1093.72 558.035   4
   5  -8   3 6876.65 1456.23   4
   5  -8   4 861.047 493.261   4
   5  -8   5 888.779 649.852   4
   5  -8   6 1430.65 821.416   4
  -5   8  -7 299.100 356.288   6
  -5   8  -8 463.744 391.244   6
  -5   8  -9 2498.79 723.558   6
  -5   8 -10 2564.99 757.381   6
  -5   8 -11 338.938 427.404   6
   5  -7 -17 1529.13 554.248   6
   5  -7 -16 711.973 279.682   4
   5  -7 -16 488.251 334.728   6
   5  -7 -15 792.818 279.378   4
   5  -7 -15 840.939 398.670   6
   5  -7 -14 1586.99 379.861   4
   5  -7 -14 1108.91 421.063   6
   5  -7 -13 416.683 203.410   4
   5  -7 -12 285.748 182.783   4
   5  -7 -11 2651.31 452.107   4
   5  -7 -10 414.352 175.746   4
   5  -7  -9 652.086 209.785   4
   5  -7  -8 4439.08 562.709   4
   5  -7  -7 1738.93 246.602   1
   5  -7  -7 2060.77 381.695   4
   5  -7  -6 866.476 242.509   4
   5  -7  -6 700.277 159.711   1
   5  -7  -5 4212.10 392.598   1
   5  -7  -5 5251.38 639.246   4
   5  -7  -4 1863.82 410.819   4
   5  -7  -4 1509.65 234.608   1
   5  -7  -3 161.952 92.4199   1
   5  -7  -3 159.659 144.521   4
   5  -7  -2 3219.46 651.740   4
   5  -7  -2 2646.92 325.931   1
   5  -7  -1 4069.75 771.084   4
   5  -7  -1 3336.86 386.003   1
   5  -7   0 33.1221 65.0781   1
   5  -7   0 175.617 382.774   4
   5  -7   1 3154.14 416.107   1
   5  -7   1 3285.01 846.096   4
   5  -7   2 4004.39 492.134   1
   5  -7   2 4348.80 1022.57   4
   5  -7   3 726.117 550.192   4
   5  -7   4 4490.66 1212.72   4
   5  -7   6 287.386 371.288   4
  -5   7  -6-125.769 118.510   2
  -5   7  -7 563.973 331.704   6
  -5   7  -8 2279.11 654.075   6
  -5   7  -9 769.921 397.089   6
  -5   7 -10 682.897 466.426   6
  -5   7 -11 3169.70 844.640   6
  -5   7 -12 902.223 553.763   6
   5  -6 -17 1996.27 626.872   6
   5  -6 -16 752.884 273.628   4
   5  -6 -16 318.279 232.947   6
   5  -6 -15 3321.15 548.077   4
   5  -6 -15 2750.73 664.501   6
   5  -6 -14 449.509 236.231   4
   5  -6 -14 269.622 234.980   6
   5  -6 -13 1541.83 359.129   4
   5  -6 -13 985.091 398.595   6
   5  -6 -12 1996.94 391.402   4
   5  -6 -12 1254.18 422.279   6
   5  -6 -11 1396.15 323.337   4
   5  -6 -10 348.254 162.769   4
   5  -6  -9 3525.29 479.373   4
   5  -6  -8 1811.54 334.889   4
   5  -6  -7 1433.99 295.772   4
   5  -6  -6 6231.25 469.497   1
   5  -6  -6 6740.15 656.320   4
   5  -6  -5 4337.69 532.413   4
   5  -6  -5 4090.76 387.189   1
   5  -6  -4 472.732 201.666   4
   5  -6  -4 137.055 81.4720   1
   5  -6  -3 1585.39 241.866   1
   5  -6  -3 1805.54 381.942   4
   5  -6  -2 1690.10 398.522   4
   5  -6  -2 1718.59 264.495   1
   5  -6  -1 33.8979 61.7503   1
   5  -6  -1 31.8789 95.1187   4
   5  -6   0 2727.48 630.763   4
   5  -6   0 2202.39 320.281   1
   5  -6   1 7559.68 1144.02   4
   5  -6   1 5233.09 519.657   1
   5  -6   2 1338.82 282.849   1
   5  -6   2 896.152 451.564   4
   5  -6   3 1289.66 305.100   1
   5  -6   3 1357.94 617.719   4
   5  -6   4 4236.10 1080.11   4
   5  -6   6 3579.85 1040.46   4
  -5   6  -6 5448.08 411.203   2
  -5   6  -7 5427.42 939.198   6
  -5   6  -8 1176.96 474.478   6
  -5   6  -9 363.265 255.447   6
  -5   6 -10 3229.89 762.102   6
  -5   6 -11 801.629 480.848   6
  -5   6 -12 965.119 467.668   6
  -5   6 -13 1833.73 651.248   6
   5  -5 -17 854.458 380.576   6
   5  -5 -16 996.319 431.729   6
   5  -5 -15 156.077 278.773   6
   5  -5 -14 1462.13 460.711   6
   5  -5 -13 2104.36 502.938   6
   5  -5 -12 31.9916 69.7076   4
   5  -5 -12 78.7976 191.505   6
   5  -5 -11 1342.14 390.398   6
   5  -5 -11 1959.98 357.438   4
   5  -5 -10 3785.65 485.033   4
   5  -5 -10 1423.74 423.143   6
   5  -5  -9 2768.15 406.551   4
   5  -5  -8 1129.86 267.092   4
   5  -5  -7 6582.27 617.074   4
   5  -5  -6 1927.91 328.419   4
   5  -5  -5 1349.13 278.267   4
   5  -5  -4 3982.80 380.621   1
   5  -5  -4 4054.35 486.702   4
   5  -5  -3 1000.62 206.451   1
   5  -5  -3 1378.87 298.718   4
   5  -5  -2-5.35597 53.7772   1
   5  -5  -2 128.613 154.231   4
   5  -5  -1 1781.41 273.168   1
   5  -5  -1 2374.78 483.212   4
   5  -5   0 923.877 350.938   4
   5  -5   0 764.290 186.296   1
   5  -5   1 493.387 169.976   1
   5  -5   1 515.086 309.013   4
   5  -5   2 7173.86 1113.45   4
   5  -5   2 5609.64 554.645   1
   5  -5   3 7311.69 1229.80   4
   5  -5   3 6713.62 632.137   1
   5  -5   4 69.5767 85.2044   1
   5  -5   4-13.9428 301.243   4
   5  -5   6 3594.62 989.736   4
  -5   5  -6 5377.99 346.859   2
  -5   5  -7 788.373 345.377   6
  -5   5  -7 623.822 108.678   2
  -5   5  -8 1213.18 457.866   6
  -5   5  -9 793.657 380.997   6
  -5   5 -10 383.638 359.646   6
  -5   5 -11 2934.44 758.469   6
  -5   5 -12 2735.18 749.246   6
  -5   5 -13 367.681 379.133   6
   5  -4 -17 891.080 461.161   6
   5  -4 -16 281.551 305.345   6
   5  -4 -15 2272.34 577.594   6
   5  -4 -14 2341.37 572.291   6
   5  -4 -13 181.214 225.626   6
   5  -4 -12 1579.45 442.423   6
   5  -4 -11 2900.44 542.193   6
   5  -4 -10 1266.44 363.722   6
   5  -4  -9 272.042 136.137   4
   5  -4  -9 106.786 118.625   6
   5  -4  -8 4136.24 471.312   4
   5  -4  -7 505.857 178.488   4
   5  -4  -6 1108.70 232.284   4
   5  -4  -5 4226.48 455.694   4
   5  -4  -4 1197.24 251.554   4
   5  -4  -3 8553.03 572.800   1
   5  -4  -3 9021.66 695.318   4
   5  -4  -2 15296.1 817.550   1
   5  -4  -2 17074.8 1022.33   4
   5  -4  -1 3000.16 350.230   1
   5  -4  -1 3047.27 461.563   4
   5  -4   0 892.031 192.944   1
   5  -4   0 1067.07 306.938   4
   5  -4   1 8189.79 981.328   4
   5  -4   1 7026.56 577.478   1
   5  -4   2 2729.00 623.776   4
   5  -4   2 2289.07 343.907   1
   5  -4   3 20.0292 194.754   4
   5  -4   3 127.628 88.6043   1
   5  -4   4 3244.92 825.490   4
   5  -4   4 4096.71 498.826   1
   5  -4   5 2922.60 450.530   1
   5  -4   6 1433.09 596.784   4
  -5   4  -6 1695.25 157.351   2
  -5   4  -7 6832.92 929.659   6
  -5   4  -7 5187.70 264.874   2
  -5   4  -8 8438.29 1062.78   6
  -5   4  -9 1204.97 412.404   6
  -5   4 -10 1687.00 505.346   6
  -5   4 -11 5009.25 890.923   6
  -5   4 -12 342.739 267.867   6
  -5   4 -13 2506.62 690.828   6
  -5   4 -14 3826.66 930.710   6
   5  -3 -18 1329.53 537.195   6
   5  -3 -17 738.036 396.406   6
   5  -3 -16 1484.13 485.685   6
   5  -3 -15 671.903 365.542   6
   5  -3 -14 519.832 330.218   6
   5  -3 -13 915.611 232.585   2
   5  -3 -13 1104.88 385.006   6
   5  -3 -12 1313.25 246.917   2
   5  -3 -12 1360.63 382.633   6
   5  -3 -11-29.9964 90.4077   2
   5  -3 -11-15.8814 124.314   6
   5  -3 -10 2190.58 296.387   2
   5  -3 -10 2304.45 468.183   6
   5  -3  -9 2822.47 323.393   2
   5  -3  -9 2406.38 474.279   6
   5  -3  -8 1555.29 232.138   2
   5  -3  -8 1118.68 321.341   6
   5  -3  -7 2665.61 283.305   2
   5  -3  -6 5113.68 482.624   4
   5  -3  -6 4980.28 386.406   2
   5  -3  -5 475.380 153.111   4
   5  -3  -4 2875.66 348.089   4
   5  -3  -3 4164.38 429.019   4
   5  -3  -2 843.331 199.885   4
   5  -3  -2 890.405 178.301   1
   5  -3  -1 15003.8 820.482   1
   5  -3  -1 18453.5 1016.83   4
   5  -3   0 9230.05 808.743   4
   5  -3   0 8566.25 618.635   1
   5  -3   1 1585.63 268.388   1
  -5   3  -1 2063.14 183.782   2
   5  -3   1 2153.72 447.671   4
  -5   3  -2 3038.19 205.180   2
   5  -3   2 3712.63 653.132   4
   5  -3   2 2645.44 349.132   1
   5  -3   3 16835.4 1544.77   4
   5  -3   3 17663.9 993.287   1
   5  -3   4 2468.40 662.361   4
   5  -3   4 2512.44 379.719   1
   5  -3   5 325.383 162.722   1
  -5   3  -5 165.540 44.2723   2
   5  -3   5-135.387 170.402   4
  -5   3  -6 2289.95 511.833   6
   5  -3   6 854.198 439.061   4
   5  -3   6 1613.89 333.955   1
  -5   3  -6 1743.84 119.382   2
  -5   3  -7 123.546 190.383   6
  -5   3  -7 196.618 34.5053   2
  -5   3  -8 102.128 212.013   6
  -5   3  -9 5227.25 835.928   6
  -5   3 -10 8231.35 1065.44   6
  -5   3 -11 435.721 320.320   6
  -5   3 -12 3284.58 741.286   6
  -5   3 -13 2062.97 611.653   6
  -5   3 -14 502.556 376.104   6
  -5   3 -15 1180.04 539.648   6
   5  -2 -18 906.037 451.951   6
   5  -2 -17 2510.57 672.347   6
   5  -2 -16 364.209 156.551   2
   5  -2 -16 1123.92 429.090   6
   5  -2 -15 436.098 183.616   2
   5  -2 -15 1259.83 458.470   6
   5  -2 -14 3707.77 468.938   2
   5  -2 -14 3771.40 665.129   6
   5  -2 -13 5424.09 766.068   6
   5  -2 -13 5083.51 520.197   2
   5  -2 -12-16.0026 78.0135   2
   5  -2 -12 264.655 207.612   6
   5  -2 -11 1254.04 228.120   2
   5  -2 -11 1426.60 374.531   6
   5  -2 -10 3260.05 349.964   2
   5  -2 -10 2861.74 501.167   6
   5  -2  -9 121.824 62.9387   2
   5  -2  -9 263.073 163.158   6
   5  -2  -8 1685.46 230.188   2
   5  -2  -8 1616.28 383.593   6
   5  -2  -7 1793.27 376.162   6
   5  -2  -7 2550.50 272.756   2
   5  -2  -6 99.1562 48.0881   2
   5  -2  -5 3825.88 308.243   2
   5  -2  -4 12839.3 579.475   2
   5  -2  -4 13618.7 734.454   4
   5  -2  -3 1645.62 254.354   4
   5  -2  -3 1845.86 199.408   2
   5  -2  -2 108.077 83.8256   4
   5  -2  -2 68.1193 65.8869   2
   5  -2  -1 5786.16 479.870   1
   5  -2  -1 5835.06 491.393   4
   5  -2   0 3689.86 397.930   1
  -5   2   0 4147.73 236.674   2
   5  -2   0 4397.15 471.743   4
  -5   2  -1 47.2430 44.5964   2
   5  -2   1-25.1169 81.6311   1
   5  -2   1-97.4487 149.693   4
   5  -2   2 8803.93 660.703   1
  -5   2  -2 9525.85 330.066   2
   5  -2   2 10446.8 981.324   4
  -5   2  -3 3888.38 172.941   2
   5  -2   3 3734.67 651.551   4
   5  -2   3 4140.02 452.349   1
  -5   2  -4 1407.63 83.4549   2
   5  -2   4 1378.21 463.005   4
   5  -2   4 2290.17 349.195   1
   5  -2   5 3707.33 743.194   4
   5  -2   5 4986.32 553.444   1
   5  -2   6 38.0566 91.6522   1
  -5   2  -6-90.8278 181.643   6
  -5   2  -7 219.897 184.821   6
   5  -2   7 239.464 164.524   1
  -5   2  -8 1531.26 424.669   6
  -5   2  -9 2492.32 541.941   6
  -5   2 -10-90.0326 117.732   6
  -5   2 -11 2845.79 652.880   6
  -5   2 -12 1743.43 534.490   6
  -5   2 -13 395.819 324.250   6
  -5   2 -14 1270.77 434.992   6
  -5   2 -15 1417.70 538.937   6
   5  -1 -18 1534.82 571.229   6
   5  -1 -17 340.726 153.741   2
   5  -1 -17 1190.08 510.075   6
   5  -1 -16 308.020 161.900   2
   5  -1 -16 720.528 378.796   6
   5  -1 -15 3175.79 448.625   2
   5  -1 -15 2815.61 621.530   6
   5  -1 -14 1024.95 243.120   2
   5  -1 -14 1376.45 396.106   6
   5  -1 -13 77.6688 92.9954   2
   5  -1 -13 496.698 268.678   6
   5  -1 -12 5094.94 491.393   2
   5  -1 -12 5189.40 703.083   6
   5  -1 -11 2970.75 355.247   2
   5  -1 -11 2902.53 511.028   6
   5  -1 -10 414.243 121.136   2
   5  -1 -10 655.265 257.987   6
   5  -1  -9 2987.10 318.901   2
   5  -1  -9 3140.11 482.737   6
   5  -1  -8 3528.61 321.936   2
   5  -1  -8 3217.25 475.340   6
   5  -1  -7-15.9670 50.4119   2
   5  -1  -7-6.89248 121.932   6
   5  -1  -6 1895.39 213.578   2
   5  -1  -6 1144.75 291.852   6
   5  -1  -5 7446.50 416.945   2
   5  -1  -4 1964.70 201.962   2
   5  -1  -3 7095.74 371.504   2
   5  -1  -2 8688.98 398.654   2
   5  -1  -2 8468.59 527.367   4
   5  -1  -1 4656.86 270.069   2
   5  -1  -1 4359.92 375.080   4
   5  -1   0 361.624 123.491   4
  -5   1   0 288.140 58.6264   2
   5  -1   0 262.794 100.236   1
   5  -1   0 239.696 60.4821   2
   5  -1   1 10538.2 694.601   1
  -5   1  -1 12219.9 606.841   4
   5  -1   1 11207.0 760.748   4
  -5   1  -1 11695.1 377.694   2
   5  -1   2 5703.89 523.767   1
  -5   1  -2 6572.48 463.224   4
   5  -1   2 6359.90 671.700   4
  -5   1  -2 5673.46 215.832   2
  -5   1  -3 1857.55 90.8249   2
   5  -1   3 1433.30 361.154   4
  -5   1  -3 2336.21 289.715   4
   5  -1   3 1741.15 292.043   1
   5  -1   4 5651.80 790.383   4
  -5   1  -4 7429.45 629.737   4
   5  -1   4 7927.75 641.916   1
  -5   1  -5 2424.35 435.332   6
  -5   1  -5 2167.37 385.720   4
   5  -1   5 1606.33 441.038   4
   5  -1   5 1874.87 329.926   1
  -5   1  -6 4190.90 588.668   6
   5  -1   6 4073.75 503.605   1
  -5   1  -7 8564.82 876.475   6
   5  -1   7 7071.11 703.991   1
  -5   1  -8 1659.98 410.338   6
  -5   1  -9 354.968 237.791   6
  -5   1 -10 4724.41 750.638   6
  -5   1 -11 1881.95 483.598   6
  -5   1 -12 81.7187 266.066   6
  -5   1 -13 1581.78 528.885   6
  -5   1 -14 1262.76 486.100   6
  -5   1 -15-160.809 168.871   6
  -5   1 -16 813.237 480.065   6
   5   0 -16 2176.33 398.231   2
   5   0 -16 2140.48 576.409   6
   5   0 -15 629.736 200.504   2
   5   0 -15 1150.87 382.832   6
   5   0 -14 230.147 105.745   2
   5   0 -14 851.524 354.422   6
   5   0 -13 915.248 210.309   2
   5   0 -13 1286.59 389.936   6
   5   0 -12 222.240 101.761   2
   5   0 -12 648.433 286.632   6
   5   0 -11 949.862 199.976   2
   5   0 -11 991.649 311.224   6
   5   0 -10 9602.14 609.548   2
   5   0 -10 8990.93 844.342   6
   5   0  -9 8219.72 526.059   2
   5   0  -9 7017.43 700.310   6
   5   0  -8 42.4758 50.1650   2
   5   0  -8 158.449 167.701   6
   5   0  -7 3451.98 301.013   2
   5   0  -7 2763.21 415.728   6
   5   0  -6 733.414 134.471   2
   5   0  -6 636.741 196.425   6
   5   0  -5 1981.97 198.953   2
   5   0  -5 1043.33 237.237   6
   5   0  -4 2055.31 191.488   2
   5   0  -3 9816.55 429.888   2
  -5   0   3 11912.7 709.563   6
  -5   0   2 144.266 112.226   6
   5   0  -2 263.938 73.1897   2
   5   0  -1 8027.00 465.569   4
   5   0  -1 8500.05 346.878   2
   5   0   0 5300.91 461.487   1
   5   0   0 5535.73 261.330   2
  -5   0   0 6616.50 289.732   2
   5   0   0 5030.91 368.858   4
   5   0   1 72.7735 31.9178   2
   5   0   1 110.503 77.9942   4
   5   0   1 31.9924 58.5120   1
  -5   0  -1 29.3083 26.6409   2
  -5   0  -2 9758.54 459.481   4
   5   0   2 8529.71 625.244   1
   5   0   2 7556.89 282.261   2
   5   0   2 10228.3 708.032   4
  -5   0  -2 9124.22 317.301   2
   5   0   3 13461.8 837.408   1
   5   0   3 13202.7 944.601   4
  -5   0  -3 14804.1 641.391   4
  -5   0  -3 13577.1 395.119   2
  -5   0  -4 769.396 164.389   4
   5   0   4 846.327 212.056   1
  -5   0  -4 1026.07 269.823   6
   5   0   4 625.626 219.685   4
  -5   0  -5 1248.81 293.858   6
  -5   0  -5 1298.71 255.367   4
   5   0   5 1429.08 279.531   1
  -5   0  -6 16268.2 1108.22   6
  -5   0  -6 12384.4 917.000   4
   5   0   6 13740.5 921.920   1
  -5   0  -7 2530.73 455.330   6
   5   0   7 2238.46 373.591   1
  -5   0  -8 7017.82 787.767   6
   5   0   8 5459.46 622.319   1
  -5   0  -9 6805.15 830.101   6
  -5   0 -10 662.078 270.459   6
  -5   0 -11 429.301 234.545   6
  -5   0 -12 3468.33 674.776   6
  -5   0 -13 505.114 266.147   6
  -5   0 -14 25.5400 239.104   6
  -5   0 -15 1656.30 548.526   6
  -5   0 -16 1005.10 478.590   6
   5   1 -16 160.751 123.667   2
   5   1 -15 682.342 189.974   2
   5   1 -15 213.905 286.198   6
   5   1 -14 2335.93 361.979   2
   5   1 -14 2669.29 557.531   6
   5   1 -13 1232.01 256.392   2
   5   1 -13 1249.15 344.642   6
   5   1 -12 103.263 84.5250   2
   5   1 -12 231.971 174.676   6
   5   1 -11 2417.07 315.487   2
   5   1 -11 2674.30 464.810   6
   5   1 -10 2634.02 308.505   2
   5   1 -10 2642.62 447.463   6
   5   1  -9 286.605 97.0290   2
   5   1  -9 232.812 143.911   6
   5   1  -8 7159.42 458.811   2
   5   1  -8 7403.62 667.351   6
   5   1  -7 2365.27 244.908   2
   5   1  -7 1936.74 357.776   6
   5   1  -6 3052.25 394.484   6
   5   1  -6 3250.28 270.148   2
   5   1  -5 6961.62 384.442   2
   5   1  -5 6097.20 560.865   6
   5   1  -4 1499.78 161.757   2
  -5  -1   4 1555.93 222.977   6
   5   1  -3 1053.94 127.134   2
  -5  -1   3 1244.94 193.012   6
   5   1  -2 892.210 108.160   2
  -5  -1   2 1166.59 195.432   6
   5   1  -1 6991.94 306.335   2
   5   1   0 1597.11 172.394   4
   5   1   0 1321.53 113.904   2
  -5  -1   0 1594.93 153.607   2
   5   1   1 16111.0 833.613   1
   5   1   1 14948.3 446.039   2
   5   1   1 15796.6 622.519   4
  -5  -1  -1 16263.5 535.786   2
   5   1   2 3949.37 419.994   1
   5   1   2 3629.76 325.058   4
   5   1   2 3996.03 173.711   2
  -5  -1  -2 3929.92 226.308   2
   5   1   3 516.177 159.410   1
  -5  -1  -3 365.662 71.5441   4
  -5  -1  -3 522.746 157.743   6
   5   1   3 388.735 42.2837   2
   5   1   3 295.001 125.491   4
   5   1   4 4410.28 467.029   1
  -5  -1  -4 4512.88 483.422   6
   5   1   4 3171.63 386.679   4
  -5  -1  -4 4819.44 299.231   4
   5   1   5 675.621 191.734   1
  -5  -1  -5 730.807 235.065   6
  -5  -1  -5 755.432 155.708   4
  -5  -1  -6 2217.40 381.676   6
  -5  -1  -6 2400.26 342.749   4
   5   1   6 2254.85 363.722   1
  -5  -1  -7 951.879 248.591   6
   5   1   7 773.998 226.653   1
  -5  -1  -7 567.778 221.477   4
  -5  -1  -8 8538.43 839.528   6
   5   1   8 7027.47 691.375   1
  -5  -1  -9 2494.26 498.740   6
  -5  -1 -10 2356.10 477.327   6
  -5  -1 -11 4516.50 707.801   6
  -5  -1 -12 382.496 271.445   6
  -5  -1 -13 1818.76 515.482   6
  -5  -1 -14 3847.74 769.717   6
  -5  -1 -15 1342.99 454.858   6
  -5  -1 -16 101.228 285.717   6
   5   2 -16 1070.89 283.044   2
   5   2 -15 1710.28 342.035   2
   5   2 -14 98.4193 109.896   2
   5   2 -14 479.628 299.649   6
   5   2 -13 485.658 138.275   2
   5   2 -13 660.582 282.638   6
   5   2 -12 1367.60 250.023   2
   5   2 -12 1261.38 339.742   6
   5   2 -11 89.4826 89.4345   2
   5   2 -11 123.724 169.474   6
   5   2 -10 1328.59 306.424   6
   5   2 -10 1210.49 215.485   2
   5   2  -9 7597.68 503.408   2
   5   2  -9 7058.67 685.123   6
   5   2  -8 2020.82 241.826   2
   5   2  -8 1535.50 305.020   6
   5   2  -7 2625.96 260.667   2
   5   2  -7 2584.86 373.661   6
   5   2  -6 12455.1 574.716   2
   5   2  -6 11475.8 739.109   6
   5   2  -5 1221.72 161.766   2
  -5  -2   5 995.142 199.055   6
   5   2  -5 1445.78 254.334   6
   5   2  -4 2938.75 240.357   2
   5   2  -4 3119.42 354.089   6
  -5  -2   4 3682.78 314.906   6
   5   2  -3 8865.61 415.951   2
  -5  -2   3 9663.39 469.873   6
   5   2  -2 6222.90 319.041   2
  -5  -2   2 6428.67 349.921   6
   5   2  -1 1.79759 23.1180   2
  -5  -2   1 89.1919 71.3343   6
   5   2   0 10078.7 376.278   2
  -5  -2  -1 3709.48 268.680   2
   5   2   1 4358.66 215.268   2
  -5  -2  -2 3022.58 303.388   6
   5   2   2 3335.44 371.112   1
   5   2   2 3066.68 164.650   2
   5   2   2 2705.18 199.922   4
  -5  -2  -3 21743.6 977.083   6
   5   2   3 23163.6 1099.55   1
   5   2   3 22260.7 574.230   2
   5   2   4 5522.19 519.581   1
  -5  -2  -4 5730.00 504.720   6
   5   2   4 4401.20 176.515   2
   5   2   5 64.6476 73.7205   1
   5   2   5 77.5256 22.1098   2
  -5  -2  -5 120.319 54.7155   4
  -5  -2  -5 125.561 101.206   6
  -5  -2  -6 1964.66 342.778   6
  -5  -2  -6 1583.19 227.477   4
   5   2   6 1916.47 322.534   1
  -5  -2  -7 7368.37 696.028   6
  -5  -2  -7 5089.73 523.937   4
   5   2   7 7035.60 638.281   1
  -5  -2  -8 4807.91 590.541   6
  -5  -2  -8 1873.35 384.676   4
   5   2   8 3799.20 489.647   1
  -5  -2  -9 2957.54 496.517   6
   5   2   9 3405.78 495.186   1
  -5  -2 -10 10632.0 998.276   6
  -5  -2 -11 1214.39 337.644   6
  -5  -2 -12 2483.08 541.315   6
  -5  -2 -13 5404.47 810.650   6
  -5  -2 -14 936.097 379.389   6
  -5  -2 -15 795.939 387.713   6
  -5  -2 -16 2595.11 641.648   6
  -5  -2 -17 375.800 321.145   6
   5   3 -15-9.66072 113.551   2
   5   3 -14 2171.21 362.703   2
   5   3 -13 1814.11 446.965   6
   5   3 -13 912.797 225.168   2
   5   3 -12 291.492 124.463   2
   5   3 -12 879.212 301.753   6
   5   3 -11 597.741 161.699   2
   5   3 -11 609.705 230.719   6
   5   3 -10 2998.91 329.780   2
   5   3 -10 3040.39 467.894   6
   5   3  -9 220.020 78.7257   2
   5   3  -9 439.178 164.947   6
   5   3  -8 1507.78 215.095   2
   5   3  -8 1521.17 297.292   6
   5   3  -7 7303.07 460.344   2
   5   3  -7 6737.50 572.283   6
   5   3  -6 4663.70 341.048   2
  -5  -3   6 2734.40 134.431   3
   5   3  -6 4530.58 429.440   6
  -5  -3   5 253.936 96.9036   6
   5   3  -5 360.184 135.187   6
   5   3  -5 370.495 92.0237   2
  -5  -3   4 4176.08 325.756   6
   5   3  -4 4004.21 355.784   6
   5   3  -4 4726.10 310.805   2
  -5  -3   3 113.897 57.2193   6
   5   3  -3 70.6177 42.7702   2
   5   3  -2 1175.52 143.070   2
  -5  -3   2 937.444 114.698   6
   5   3  -1 8624.64 407.177   2
  -5  -3   1 6265.49 269.736   6
   5   3   0 5873.64 333.909   2
  -5  -3  -1 974.930 123.721   6
   5   3   1 819.543 110.729   2
  -5  -3  -2 9346.51 469.187   6
   5   3   2 9020.21 385.257   2
  -5  -3  -3 12923.5 641.646   6
   5   3   3 13912.9 812.087   1
   5   3   3 12510.1 451.120   2
   5   3   4 772.564 197.543   1
  -5  -3  -4 586.188 165.418   6
   5   3   4 620.803 82.8328   2
   5   3   5 16464.4 952.627   1
  -5  -3  -5 17004.1 908.133   6
  -5  -3  -6 2538.81 370.111   6
   5   3   6 2734.20 379.418   1
  -5  -3  -7 1306.76 290.304   6
   5   3   7 739.709 75.2694   2
  -5  -3  -7 654.596 172.148   4
   5   3   7 1049.96 242.089   1
  -5  -3  -8 875.069 283.507   6
   5   3   8 806.088 68.1637   2
  -5  -3  -8 624.091 228.482   4
   5   3   8 896.683 245.024   1
  -5  -3  -9 5202.64 625.877   6
  -5  -3  -9 1779.88 419.201   4
   5   3   9 3746.31 157.147   2
   5   3   9 5198.75 584.991   1
  -5  -3 -10 1474.00 355.778   6
  -5  -3 -11 1913.62 419.978   6
  -5  -3 -12 978.608 304.966   6
  -5  -3 -13 200.178 184.150   6
  -5  -3 -14 1121.34 387.492   6
  -5  -3 -15 3194.49 422.906   3
  -5  -3 -15 3248.38 674.428   6
  -5  -3 -16 830.911 471.168   6
  -5  -3 -17 1039.72 414.834   6
   5   4 -15 962.071 251.671   2
   5   4 -14 1806.44 324.487   2
   5   4 -13 162.070 91.1793   2
   5   4 -12 2998.49 378.272   2
   5   4 -11 3225.17 523.727   6
   5   4 -11 3398.21 378.233   2
   5   4 -10 1344.20 313.171   6
   5   4 -10 1322.28 240.006   2
   5   4  -9 584.954 146.796   2
   5   4  -9 571.857 190.427   6
   5   4  -8 3672.10 347.555   2
   5   4  -8 3945.26 476.616   6
   5   4  -7 141.749 78.9513   2
   5   4  -7 192.324 123.412   6
   5   4  -6 1083.17 167.092   2
   5   4  -6 1122.00 223.176   6
  -5  -4   5 5789.45 259.475   3
  -5  -4   5 5382.23 427.755   6
   5   4  -5 7207.64 425.758   2
   5   4  -5 6373.14 454.507   6
  -5  -4   4 2574.30 174.180   3
  -5  -4   4 2279.07 237.408   6
   5   4  -4 2382.14 242.159   6
   5   4  -4 2966.56 258.370   2
   5   4  -3 23.0367 41.7960   2
   5   4  -3 76.5693 62.0764   6
   5   4  -2 8259.67 469.177   2
   5   4  -1 6422.41 396.706   2
   5   4   0 947.984 142.474   2
   5   4   1 5604.11 598.104   4
   5   4   1 12009.5 512.056   2
  -5  -4  -2 69.6016 60.9416   6
   5   4   2 127.644 53.8784   2
   5   4   2 83.0249 100.199   4
   5   4   3 6248.61 515.219   1
  -5  -4  -3 5016.87 356.057   6
   5   4   3 5298.90 327.783   2
  -5  -4  -4 14639.3 739.364   6
   5   4   4 16770.1 914.770   1
  -5  -4  -5 7779.39 573.700   6
   5   4   5 7662.60 621.569   1
  -5  -4  -6-21.7154 91.4765   6
   5   4   6-27.4682 55.3630   1
  -5  -4  -7 1405.34 280.991   6
  -5  -4  -7 363.773 115.780   4
   5   4   7 1483.10 294.841   1
  -5  -4  -7 815.458 89.7139   4
  -5  -4  -8 371.268 188.590   6
  -5  -4  -8 224.694 141.990   4
   5   4   8 147.213 96.5045   1
   5   4   9 333.659 61.5647   2
   5   4   9 296.329 135.075   1
  -5  -4  -9 537.596 209.362   6
  -5  -4 -10 3820.75 542.360   6
  -5  -4 -11 1315.86 325.504   6
  -5  -4 -12 522.802 245.443   6
  -5  -4 -13 2214.32 481.845   6
  -5  -4 -14 1672.65 450.786   6
  -5  -4 -14 1524.60 272.222   3
  -5  -4 -15 334.365 266.069   6
  -5  -4 -15-45.8791 120.469   3
  -5  -4 -16 2813.97 425.152   3
  -5  -4 -16 3552.90 714.535   6
  -5  -4 -17 3507.03 749.766   6
   5   5 -14 141.249 152.164   2
   5   5 -13 3085.19 408.043   2
   5   5 -12 1846.40 308.020   2
   5   5 -11 358.915 136.841   2
   5   5 -10 1401.17 334.671   6
   5   5 -10 1141.63 219.842   2
   5   5  -9 4118.33 403.468   2
   5   5  -9 4829.13 555.744   6
   5   5  -8 1055.91 248.282   6
   5   5  -8 1036.96 193.432   2
   5   5  -7 2501.80 280.417   2
   5   5  -7 2616.80 349.388   6
   5   5  -6 2762.37 283.898   2
   5   5  -6 2297.32 303.330   6
   5   5  -5 1215.55 198.557   6
   5   5  -5 1508.69 208.500   2
  -5  -5   4 875.800 123.319   3
   5   5  -4 431.809 103.434   2
   5   5  -4 633.305 124.196   6
  -5  -5   3 1345.52 150.632   3
   5   5  -3 1210.85 143.631   6
   5   5  -3 1376.17 211.507   2
  -5  -5   2 475.279 84.7668   3
   5   5  -2 584.293 124.054   2
   5   5  -1 4808.67 366.342   2
  -5  -5   0 43924.8 1193.43   5
   5   5   0 37575.0 1234.28   2
  -5  -5  -1 11754.5 519.461   5
   5   5   1 11130.8 550.198   2
  -5  -5  -2 221.151 76.3956   5
   5   5   2 131.764 54.1622   2
   5   5   2 138.417 113.587   4
  -5  -5  -2 147.422 53.5410   6
  -5  -5  -3 525.983 117.743   6
  -5  -5  -3 612.614 116.729   5
   5   5   3 603.570 142.409   4
   5   5   4 1992.02 266.733   6
  -5  -5  -4 2431.67 220.803   5
   5   5   4 2441.04 333.563   1
  -5  -5  -4 2139.86 236.835   6
   5   5   5 1331.92 251.954   1
  -5  -5  -5 1243.39 212.829   6
   5   5   6 3648.05 431.888   1
  -5  -5  -6 3800.89 404.774   6
  -5  -5  -7 3136.83 234.068   4
   5   5   7 5675.05 542.198   1
  -5  -5  -7 5916.68 529.904   6
  -5  -5  -8 325.452 159.103   6
  -5  -5  -8 135.568 51.6433   4
   5   5   8 407.966 164.833   1
  -5  -5  -9 2274.52 211.277   4
  -5  -5  -9 3196.85 442.483   6
   5   5   9 3110.85 424.412   1
   5   5  10 3434.39 466.268   1
  -5  -5 -10 3684.10 508.864   6
  -5  -5 -11 145.598 180.817   6
  -5  -5 -12 3242.75 382.419   3
  -5  -5 -12 3952.39 598.500   6
  -5  -5 -13 1285.78 358.879   6
  -5  -5 -13 847.586 199.879   3
  -5  -5 -14 274.581 152.784   6
  -5  -5 -14 10.9912 136.081   3
  -5  -5 -15 469.148 283.423   6
  -5  -5 -15 132.216 125.386   3
  -5  -5 -16 1700.04 493.637   6
  -5  -5 -16 1304.56 296.377   3
  -5  -5 -17 944.763 416.470   6
  -5  -5 -18 680.280 403.389   6
   5   6 -14 2675.48 405.573   2
   5   6 -13 1156.49 258.885   2
   5   6 -12 186.917 115.971   2
   5   6 -11 1619.40 279.771   2
   5   6 -10 974.615 206.070   2
   5   6  -9 37.8596 50.5903   2
   5   6  -8 8367.22 567.598   2
   5   6  -8 8020.19 692.329   6
   5   6  -7 4859.23 412.944   2
   5   6  -7 4535.45 486.810   6
   5   6  -6 5100.67 463.927   6
   5   6  -6 5490.63 437.129   2
   5   6  -5 4851.43 424.546   2
   5   6  -5 5532.71 433.082   6
   5   6  -4 3255.11 349.602   2
   5   6  -4 3162.17 280.098   6
   5   6  -3 158.242 61.6504   6
  -5  -6   3 235.444 71.3513   5
   5   6  -3 142.557 77.0998   2
  -5  -6   2 6146.04 374.847   3
  -5  -6   2 8128.17 443.433   5
   5   6  -2 6428.81 476.747   2
  -5  -6   1 10823.5 536.188   3
   5   6  -1 12888.3 676.781   2
  -5  -6   0 1681.59 199.647   5
   5   6   0 1422.56 209.665   2
  -5  -6   0 1313.07 169.920   3
  -5  -6  -1 6327.84 388.367   5
  -5  -6  -1 4854.67 350.224   3
   5   6   1 5417.54 421.044   2
   5   6   2 13197.0 491.801   6
  -5  -6  -2 17650.9 667.408   5
  -5  -6  -2 13320.9 625.991   3
   5   6   2 10872.0 892.473   4
   5   6   3 1423.32 182.056   6
  -5  -6  -3 1768.41 201.265   5
  -5  -6  -3 1394.25 176.164   6
  -5  -6  -3 1258.53 191.472   3
   5   6   3 1811.04 295.907   4
   5   6   4 7335.93 486.414   6
  -5  -6  -4 8273.47 453.888   5
   5   6   4 8487.48 613.801   1
   5   6   4 8091.66 419.663   4
  -5  -6  -4 6942.24 440.297   6
   5   6   5 26751.9 1173.18   1
  -5  -6  -5 28620.8 905.617   5
  -5  -6  -5 21391.8 894.798   6
   5   6   6 6761.95 583.929   1
  -5  -6  -6 9098.41 514.681   5
  -5  -6  -6 6136.87 483.554   6
  -5  -6  -7 461.802 143.647   6
   5   6   7 360.448 137.467   1
  -5  -6  -7 304.495 82.8214   3
  -5  -6  -7 429.042 111.124   5
  -5  -6  -7 400.413 108.444   4
  -5  -6  -8 6941.71 405.724   5
  -5  -6  -8 5829.08 470.544   3
  -5  -6  -8 5391.47 384.343   4
   5   6   8 6430.73 579.059   1
  -5  -6  -8 6467.44 579.717   6
  -5  -6  -9 5683.01 476.037   3
   5   6   9 5638.66 557.651   1
  -5  -6  -9 4698.85 345.974   4
  -5  -6  -9 5907.28 595.780   6
  -5  -6 -10 73.0662 107.088   6
  -5  -6 -10-13.3408 116.614   3
   5   6  10 184.566 133.678   1
  -5  -6 -10 121.684 63.0744   4
  -5  -6 -11 6015.34 519.544   3
  -5  -6 -11 4169.60 356.959   4
  -5  -6 -11 5974.28 668.360   6
  -5  -6 -12 3864.15 364.616   4
  -5  -6 -12 4595.66 475.603   3
  -5  -6 -12 5261.84 689.224   6
  -5  -6 -13 398.669 248.371   6
  -5  -6 -13 87.1041 81.2097   3
  -5  -6 -14 3028.08 415.586   3
  -5  -6 -14 2990.29 561.329   6
  -5  -6 -15 1438.57 406.966   6
  -5  -6 -15 1184.06 265.604   3
  -5  -6 -16 505.640 293.051   6
  -5  -6 -16 156.545 142.840   3
  -5  -6 -17 1268.08 429.535   6
  -5  -6 -17 1645.17 368.185   3
  -5  -6 -18 1582.24 535.475   6
   5   7 -13 515.951 186.022   2
   5   7 -12 1625.73 302.829   2
   5   7 -11 842.980 203.547   2
   5   7 -10 212.882 108.711   2
   5   7  -9 1229.97 231.684   2
   5   7  -8 3288.26 367.815   2
   5   7  -7-49.8112 66.8697   2
   5   7  -6 4640.99 453.042   6
   5   7  -6 4231.82 429.801   2
   5   7  -5 228.558 142.007   6
   5   7  -5 176.515 118.981   2
   5   7  -4 745.120 152.481   6
  -5  -7   4 925.308 157.248   5
   5   7  -4 760.321 175.974   2
  -5  -7   3 5191.58 405.412   5
   5   7  -3 3482.17 379.424   2
   5   7  -3 2929.41 247.255   6
  -5  -7   2 9239.76 489.991   5
   5   7  -2 8317.82 566.136   2
   5   7  -2 5061.21 264.982   6
  -5  -7   1 1020.93 170.693   3
  -5  -7   1 955.954 143.305   5
   5   7  -1 1099.24 201.580   2
  -5  -7   0 3846.49 321.069   3
  -5  -7   0 4151.36 316.346   5
   5   7   0 4028.52 392.328   2
   5   7   1 2413.56 302.628   2
  -5  -7  -1 2459.63 266.284   3
  -5  -7  -1 2831.26 256.452   5
   5   7   2 2012.10 174.819   6
  -5  -7  -2 2155.56 220.449   5
  -5  -7  -2 1877.79 233.183   3
   5   7   3 551.162 129.816   6
  -5  -7  -3 418.817 98.7402   3
  -5  -7  -3 518.275 110.276   5
   5   7   3 528.317 193.550   4
   5   7   4 5980.95 438.992   6
  -5  -7  -4 5997.36 377.949   5
  -5  -7  -4 5423.31 419.882   3
  -5  -7  -4 5354.58 413.868   6
   5   7   4 8201.18 551.140   4
   5   7   5 615.948 115.178   4
  -5  -7  -5 455.721 113.226   3
  -5  -7  -5 479.944 110.730   5
  -5  -7  -5 393.837 127.357   6
   5   7   5 674.230 192.400   1
   5   7   6 7853.28 618.327   1
  -5  -7  -6 7442.46 431.641   5
  -5  -7  -6 6241.03 478.241   3
  -5  -7  -6 3714.34 454.730   4
  -5  -7  -6 6336.47 505.710   6
  -5  -7  -7 6169.05 398.785   5
  -5  -7  -7 4994.67 441.899   3
  -5  -7  -7 5155.33 490.312   4
  -5  -7  -7 5213.74 484.167   6
   5   7   7 6041.53 547.096   1
  -5  -7  -8 1803.07 219.628   5
  -5  -7  -8 1238.89 220.058   3
  -5  -7  -8 1462.17 250.875   4
   5   7   8 1696.27 291.706   1
  -5  -7  -8 1528.28 285.896   6
  -5  -7  -9 573.445 192.393   6
  -5  -7  -9 771.540 148.713   5
  -5  -7  -9 517.952 136.249   3
   5   7   9 616.673 181.685   1
  -5  -7  -9 585.244 148.684   4
  -5  -7 -10 5408.12 369.202   5
  -5  -7 -10 4383.12 441.098   3
   5   7  10 4254.39 491.135   1
  -5  -7 -10 4070.74 371.451   4
  -5  -7 -10 4619.18 543.664   6
  -5  -7 -11 6722.88 571.174   3
  -5  -7 -11 6902.08 712.544   6
  -5  -7 -11 4857.86 416.391   4
  -5  -7 -12 810.642 253.854   6
  -5  -7 -12 519.495 135.647   4
  -5  -7 -12 616.398 170.681   3
  -5  -7 -13 2733.08 488.828   6
  -5  -7 -13 2772.53 390.775   3
  -5  -7 -14 695.751 316.836   6
  -5  -7 -14 731.988 206.977   3
  -5  -7 -15 318.301 167.377   3
  -5  -7 -15 499.284 272.081   6
  -5  -7 -16 2043.97 515.989   6
  -5  -7 -16 2928.14 463.313   3
  -5  -7 -17 1162.90 398.589   6
  -5  -7 -17 1051.68 299.057   3
  -5  -7 -18 92.0082 214.551   6
   5   8 -12 731.847 209.513   2
   5   8 -11-47.2909 95.5736   2
   5   8 -10 1381.66 271.649   2
   5   8  -9 1420.64 258.460   2
   5   8  -8 57.7546 70.6173   2
   5   8  -7 5637.57 526.450   2
   5   8  -6 5085.12 510.180   2
  -5  -8   5-49.1109 44.9557   5
   5   8  -5 217.160 151.708   2
  -5  -8   4 5324.99 406.072   5
   5   8  -4 4244.61 380.461   6
   5   8  -4 4490.59 465.208   2
  -5  -8   3 2418.48 261.974   5
   5   8  -3 2151.74 236.501   6
   5   8  -3 2228.55 319.698   2
   5   8  -2 33.9431 55.3015   6
  -5  -8   2 72.3486 71.9618   5
   5   8  -2 159.429 104.004   2
   5   8  -1 5265.38 280.883   6
  -5  -8   1 6540.22 414.173   5
   5   8  -1 3152.23 248.850   6
   5   8  -1 7068.46 556.315   2
   5   8   0 5154.18 249.811   6
  -5  -8   0 6616.90 409.848   5
   5   8   0 6766.29 554.439   2
   5   8   1 223.482 67.1090   6
  -5  -8  -1 498.187 165.288   3
  -5  -8  -1 392.174 95.7916   5
  -5  -8  -2 3094.54 319.002   3
  -5  -8  -2 3464.09 300.085   5
   5   8   2 3193.95 251.703   6
  -5  -8  -3 8194.61 536.299   3
  -5  -8  -3 9033.16 503.035   5
   5   8   3 8511.05 485.876   6
   5   8   4 2790.42 313.085   6
  -5  -8  -4 2857.43 311.001   3
  -5  -8  -4 3116.28 287.879   5
  -5  -8  -4 1931.03 425.059   4
   5   8   4 3421.57 433.628   4
  -5  -8  -5 3636.08 366.461   3
  -5  -8  -5 4070.78 324.149   5
   5   8   5 4558.83 457.020   1
  -5  -8  -5 1519.07 384.900   4
  -5  -8  -5 3260.42 385.322   6
   5   8   5 4865.28 413.019   4
   5   8   6 5989.61 393.799   4
   5   8   6 6244.10 547.353   1
  -5  -8  -6 5157.43 370.545   5
  -5  -8  -6 4477.83 457.347   6
  -5  -8  -6 3344.38 505.559   4
  -5  -8  -6 4730.40 426.606   3
  -5  -8  -7 360.516 120.953   3
  -5  -8  -7 412.035 110.682   5
  -5  -8  -7 370.311 165.762   6
   5   8   7 531.733 160.979   1
  -5  -8  -7 523.435 205.770   4
   5   8   8 3792.55 415.328   1
  -5  -8  -8 3380.88 377.224   3
  -5  -8  -8 3868.94 323.548   5
  -5  -8  -8 3282.16 433.721   4
  -5  -8  -8 3184.15 416.933   6
  -5  -8  -9 8961.09 653.580   3
  -5  -8  -9 10502.3 544.838   5
  -5  -8  -9 8857.30 695.503   4
   5   8   9 9717.55 688.780   1
  -5  -8  -9 8647.80 726.421   6
  -5  -8 -10 2776.11 435.474   6
  -5  -8 -10 2902.00 381.789   3
  -5  -8 -10 2669.83 353.138   4
   5   8  10 2807.61 375.762   1
  -5  -8 -10 3346.58 308.798   5
  -5  -8 -11 214.742 177.724   6
  -5  -8 -11 58.1445 77.7280   4
  -5  -8 -11 5.85196 87.8296   3
  -5  -8 -11 105.822 84.8865   5
  -5  -8 -12 1381.86 333.145   6
  -5  -8 -12 1552.98 295.771   3
  -5  -8 -13 249.416 185.681   6
  -5  -8 -13 515.714 186.577   3
  -5  -8 -14 780.006 301.837   6
  -5  -8 -14 262.417 167.328   3
  -5  -8 -15 1703.88 334.855   3
  -5  -8 -15 1854.86 463.056   6
  -5  -8 -16 1190.76 410.975   6
  -5  -8 -16 1673.33 361.519   3
  -5  -8 -17 502.361 274.227   6
  -5  -8 -17 1251.30 339.268   3
  -5  -8 -18 2102.56 570.603   6
  -5  -8 -18 3116.00 533.207   3
   5   9 -11 2419.01 390.930   2
   5   9 -10 937.549 232.129   2
   5   9  -9 195.600 117.439   2
   5   9  -8 2868.91 384.575   2
   5   9  -7 1467.14 273.533   2
   5   9  -6 597.980 203.254   2
  -5  -9   6 590.249 143.864   5
  -5  -9   5 2689.25 298.409   5
   5   9  -5 2399.60 370.346   2
  -5  -9   4 3882.69 341.551   5
   5   9  -4 3961.04 458.508   2
  -5  -9   3 61.3140 64.9705   5
   5   9  -3 100.591 87.9789   2
   5   9  -2 7651.46 465.799   6
  -5  -9   2 8153.91 505.592   5
   5   9  -2 8694.83 671.568   2
   5   9  -1 4046.25 308.692   6
  -5  -9   1 4457.87 367.105   5
   5   9  -1 4480.71 482.275   2
  -5  -9   0 13.4149 40.2824   5
   5   9   0 34.3312 82.4415   2
   5   9   0 88.3444 56.2986   6
   5   9   1 5619.48 352.876   6
  -5  -9  -1 6515.87 446.300   5
  -5  -9  -2 3982.64 403.754   3
  -5  -9  -2 4338.87 356.289   5
   5   9   2 3782.99 302.875   6
   5   9   3 393.127 122.877   6
  -5  -9  -3 454.213 152.885   3
  -5  -9  -3 423.407 107.972   5
  -5  -9  -3 583.716 281.483   4
  -5  -9  -4 2488.73 320.353   3
  -5  -9  -4 2526.59 273.214   5
  -5  -9  -4 2434.98 546.554   4
  -5  -9  -5 7211.85 541.852   3
  -5  -9  -5 7625.20 481.355   5
  -5  -9  -5 3742.05 660.646   4
  -5  -9  -6-27.7040 79.0001   3
  -5  -9  -6-29.7847 69.8719   5
  -5  -9  -6 76.4173 94.8284   6
   5   9   6 145.530 102.568   1
  -5  -9  -6 218.410 225.594   4
  -5  -9  -7 740.016 199.680   3
  -5  -9  -7 766.244 144.554   5
  -5  -9  -7 1010.91 243.919   6
   5   9   7 798.342 197.833   1
  -5  -9  -7 579.643 245.134   4
  -5  -9  -8 1891.24 282.875   3
  -5  -9  -8 2471.20 276.007   5
  -5  -9  -8 1941.98 393.881   4
  -5  -9  -8 2183.67 354.154   6
   5   9   8 2333.11 318.203   1
  -5  -9  -9 1083.73 179.418   5
  -5  -9  -9 1153.55 240.046   3
   5   9   9 1137.11 235.139   1
  -5  -9  -9 1279.31 320.618   4
  -5  -9  -9 864.904 236.675   6
  -5  -9 -10 886.906 222.760   3
  -5  -9 -10 870.131 165.435   5
   5   9  10 647.679 190.676   1
  -5  -9 -10 889.696 274.798   4
  -5  -9 -10 805.033 237.354   6
  -5  -9 -11 3856.57 452.472   3
  -5  -9 -11 4142.71 355.115   5
  -5  -9 -11 3203.18 434.658   4
  -5  -9 -11 3540.80 509.701   6
  -5  -9 -12 1015.76 273.262   3
  -5  -9 -12 1139.11 194.578   5
  -5  -9 -12 721.361 262.322   6
  -5  -9 -13 941.572 169.297   5
  -5  -9 -13 703.961 217.802   3
  -5  -9 -13 835.316 284.181   6
  -5  -9 -14 870.329 262.685   3
  -5  -9 -14 743.069 272.923   6
  -5  -9 -15 1062.37 293.707   3
  -5  -9 -15 821.629 314.393   6
  -5  -9 -16 131.855 153.846   6
  -5  -9 -16 652.932 284.996   3
  -5  -9 -17 1482.74 429.960   6
  -5  -9 -18 366.217 252.585   6
   5  10 -10 810.802 229.562   2
   5  10  -9 3165.03 424.519   2
   5  10  -8 717.475 214.529   2
   5  10  -7 685.186 214.895   2
[truncated: 3,380,831 more chars]
